# Supplementary material for: Phylogenomic Analyses of Bradyrhizobium Reveal Uneven Distribution of the Lateral and Subpolar Flagellar Systems, Which Extends to Rhizobiales
Source: MDPI journal article supplement (doi:10.3390/microorganisms7020050), 2019-02-13
Supplement: s1 [file s1]

**Supplementary Table S2.** Subpolar and lateral flagellar systems distribution in sequenced *Bradyrhizobium* genomes used in this study.

| Genome name                                                        | Subpolar flagellum | Lateral flagellum | Subpolar flagellum ascc. No.      | Lateral flagellum ascc. No.       |
|--------------------------------------------------------------------|--------------------|-------------------|-----------------------------------|-----------------------------------|
| <i>Bradyrhizobium liaoningense</i> CCBau 05525                     | +                  | +                 | AJQC01000206.1                    | AJQC01000679.1                    |
| <i>Bradyrhizobium liaoningense</i> CCBau 83689                     | +                  | +                 | AJQD01000348.1                    | AJQD01000052.1                    |
| <i>Bradyrhizobium japonicum</i> USDA 135                           | +                  | -                 | AXAT01000174.1                    | -                                 |
| <i>Bradyrhizobium liaoningense</i> CCNWSX0360                      | +                  | +                 | LUKO01000219.1                    | LUKO01000044.1                    |
| <i>Bradyrhizobium</i> sp. CCBau 43298                              | +                  | +                 | AJQE01000185.1                    | AJQE01000346.1                    |
| <i>Bradyrhizobium</i> sp. CCH5-F6                                  | +                  | +                 | LSIC01000115.1                    | LSIC01000022.1                    |
| <i>Bradyrhizobium japonicum</i> is5                                | +                  | +                 | ATWP01000009.1                    | ATWP01000005.1                    |
| <i>Bradyrhizobium japonicum</i> in8p8                              | +                  | +                 | AUGD01000009.1                    | AUGD01000005.1                    |
| <i>Bradyrhizobium</i> sp. Leaf396                                  | +                  | +                 | LMQJ01000065.1                    | LMQJ01000012.1                    |
| <i>Bradyrhizobium yuanmingense</i> CGMCC 1.3531 <sup>b</sup>       | +                  | +                 | IQ15DRAFT_scaffol d00012.12       | IQ15DRAFT_scaffol d00011.11       |
| <b><i>Bradyrhizobium yuanmingense</i> CCBau 10071<sup>T</sup></b>  | <b>+</b>           | <b>+</b>          | <b>FMAE01000011.1</b>             | <b>FMAE01000001.1</b>             |
| <i>Bradyrhizobium yuanmingense</i> CCBau 25021                     | ±                  | +                 | AJQK01000243.1                    | AJQK01000228.1                    |
| <i>Bradyrhizobium yuanmingense</i> CCBau 35157                     | +                  | +                 | AJQL01000348.1                    | AJQL01000201.1                    |
| <i>Bradyrhizobium yuanmingense</i> BR3267                          | +                  | +                 | LJYF01000050.1                    | LJYF01000042.1                    |
| <i>Bradyrhizobium yuanmingense</i> CCBau 05623                     | +                  | +                 | AJQJ01000382.1                    | AJQJ01000476.1                    |
| <i>Bradyrhizobium</i> sp. DOA9                                     | +                  | +                 | DF820425.1                        | DF820425.1                        |
| <i>Bradyrhizobium</i> sp. WSM1743                                  | +                  | +                 | AXAZ01000061.1                    | AXAZ01000012.1                    |
| <i>Bradyrhizobium</i> sp. DOA1                                     | +                  | +                 | JXJM01000001.1                    | JXJM01000001.1                    |
| <i>Bradyrhizobium</i> sp. CCGE-LA001                               | +                  | +                 | CP013949.1                        | CP013949.1                        |
| <b><i>Bradyrhizobium daqingense</i> CGMCC 1.10947<sup>Tb</sup></b> | <b>+</b>           | <b>+</b>          | <b>IQ17DRAFT_scaffol d00002.2</b> | <b>IQ17DRAFT_scaffol d00009.9</b> |
| <i>Bradyrhizobium</i> sp. Rc2d                                     | +                  | +                 | FNCU01000064.1                    | FNCU01000001.1                    |
| <i>Bradyrhizobium</i> sp. CCBau 15615                              | +                  | +                 | AJQG01000101.1                    | AJQG01000149.1                    |
| <i>Bradyrhizobium japonicum</i> USDA 4                             | +                  | +                 | AXAF01000018.1                    | KI421457.1                        |
| <i>Bradyrhizobium</i> sp. CCBau 15635                              | +                  | +                 | AJQH01000144.1                    | AJQH01000061.1                    |
| <i>Bradyrhizobium</i> sp. CCBau 15544                              | +                  | +                 | AJQF01000166.1                    | AJQF01000373.1                    |
| <i>Bradyrhizobium</i> sp. Rc3b                                     | +                  | +                 | FOUS01000025.1                    | FOUS01000003.1                    |
| <i>Bradyrhizobium</i> sp. WSM2793                                  | +                  | +                 | KB902809.1                        | KB902780.1                        |
| <i>Bradyrhizobium</i> sp. ERR11                                    | +                  | +                 | FMAI01000022.1                    | FMAI01000011.1                    |
| <i>Bradyrhizobium</i> sp. AT1                                      | +                  | +                 | JXDL01000001.1                    | JXDL01000001.1                    |
| <i>Bradyrhizobium japonicum</i> 22                                 | +                  | -                 | KI519399.1                        | -                                 |
| <i>Bradyrhizobium japonicum</i> USDA 124                           | +                  | +                 | KB893818.1                        | KB893805.1                        |
| <i>Bradyrhizobium huanghuaihaiense</i> CGMCC 1.10948 <sup>b</sup>  | +                  | +                 | IQ16DRAFT_scaffol d00014.14       | IQ16DRAFT_scaffol d00006.6        |
| <b><i>Bradyrhizobium stylosanthis</i> BR 446<sup>T</sup></b>       | <b>+</b>           | <b>+</b>          | <b>LVEM01000001.1</b>             | <b>LVEM01000003.1</b>             |
| <i>Bradyrhizobium</i> sp. USDA 3384                                | +                  | +                 | AXAD01000004.1                    | AXAD01000005.1                    |
| <b><i>Bradyrhizobium arachidis</i> LMG 26795<sup>T</sup></b>       | <b>+</b>           | <b>+</b>          | <b>FPBQ01000003.1</b>             | <b>FPBQ01000002.1</b>             |
| <i>Bradyrhizobium japonicum</i> FN1                                | +                  | +                 | JGCL01000027.1                    | JGCL01000003.1                    |
| <i>Bradyrhizobium japonicum</i> E109                               | +                  | +                 | CP010313.1                        | CP010313.1                        |
| <b><i>Bradyrhizobium japonicum</i> USDA 6<sup>T</sup></b>          | <b>+</b>           | <b>+</b>          | <b>AP012206.1</b>                 | <b>AP012206.1</b>                 |
| <i>Bradyrhizobium japonicum</i> CCBau 25435                        | +                  | +                 | AJQA01000196.1                    | AJQA01000242.1                    |
| <i>Bradyrhizobium japonicum</i> SEMIA 5079                         | +                  | +                 | CP007569.1                        | CP007569.1                        |

|                                                                  |   |   |                       |                       |
|------------------------------------------------------------------|---|---|-----------------------|-----------------------|
| <i>Bradyrhizobium japonicum</i> CCBAU 15618                      | + | + | AJPZ01000150.1        | AJPZ01000249.1        |
| <i>Bradyrhizobium japonicum</i> USDA 38                          | + | + | AXAG01000016.1        | KI421458.1            |
| <i>Bradyrhizobium japonicum</i> Is-34                            | + | + | JRPN01000005.1        | JRPN01000001.1        |
| <i>Bradyrhizobium japonicum</i> CCBAU 83623                      | + | + | AJQB01000715.1        | AJQB01000642.1        |
| <i>Bradyrhizobium japonicum</i> CCBAU 15354                      | + | + | AJPX01000310.1        | AJPX01000508.1        |
| <i>Bradyrhizobium japonicum</i> CCBAU 15517                      | + | + | AJPY01000263.1        | AJPY01000027.1        |
| <i>Bradyrhizobium japonicum</i> USDA 123                         | + | + | AXVP01000018.1        | AXVP01000003.1        |
| <i>Bradyrhizobium</i> sp. G22                                    | + | + | LN907826.1            | LN907826.1            |
| <i>Bradyrhizobium japonicum</i> Is-1                             | + | + | LGUJ01000012.1        | LGUJ01000001.1        |
| <i>Bradyrhizobium diazoefficiens</i> USDA 122                    | + | + | CP013127.1            | CP013127.1            |
| <i>Bradyrhizobium diazoefficiens</i> SEMIA 5080                  | + | + | ADOU02000005.1        | ADOU02000005.1        |
| <i>Bradyrhizobium</i> sp. CCBAU 41267                            | + | + | AJQI01000329.1        | AJQI01000093.1        |
| <b><i>Bradyrhizobium diazoefficiens</i> USDA 110<sup>T</sup></b> | + | + | <b>BA000040.2</b>     | <b>BA000040.2</b>     |
| <i>Bradyrhizobium diazoefficiens</i> NK6                         | + | - | AP014685.1            | -                     |
| <i>Bradyrhizobium</i> sp. CF659                                  | + | + | FOQJ01000013.1        | FOQJ01000002.1        |
| <i>Bradyrhizobium</i> sp. WSM2254                                | + | + | KI421444.1            | AXAB01000032.1        |
| <i>Bradyrhizobium</i> sp. YR681                                  | + | + | AKIY01000099.1        | AKIY01000020.1        |
| <i>Bradyrhizobium</i> sp. OK095                                  | + | + | FOBX01000006.1        | FOBX01000014.1        |
| <i>Bradyrhizobium</i> sp. S23321                                 | + | + | AP012279.1            | AP012279.1            |
| <i>Bradyrhizobium</i> sp. WSM471                                 | + | + | CM001442.1            | CM001442.1            |
| <i>Bradyrhizobium</i> sp. BF49                                   | + | + | LN901633.1            | LN901633.1            |
| <i>Bradyrhizobium</i> sp. WSM1253                                | + | + | JH600073.1            | JH600073.1            |
| <i>Bradyrhizobium</i> sp. WSM1417                                | + | + | KI911783.1            | KI911783.1            |
| <i>Bradyrhizobium</i> sp. URHA0013                               | + | + | JADK01000009.1        | KI912427.1            |
| <i>Bradyrhizobium</i> sp. WSM4349                                | + | + | KB890518.1            | KB890499.1            |
| <i>Bradyrhizobium</i> sp. LTSP849                                | + | + | JYMR01000051.1        | JYMR01000052.1        |
| <i>Bradyrhizobium</i> sp. LTSP857                                | + | + | JYMS01000049.1        | JYMS01000047.1        |
| <i>Bradyrhizobium</i> sp. WSM3983                                | + | + | AXAY01000034.1        | KI421489.1            |
| <i>Bradyrhizobium</i> sp. Gha                                    | + | + | FOQM01000005.1        | -                     |
| <i>Bradyrhizobium</i> sp. Ghvi                                   | + | + | FOVU01000004.1        | -                     |
| <b><i>Bradyrhizobium manausense</i> BR3351<sup>T</sup></b>       | + | + | <b>LJYG01000054.1</b> | <b>LJYG01000026.1</b> |
| <i>Bradyrhizobium</i> sp. Cp5.3                                  | + | + | AUFA01000010.1        | KE384515.1            |
| <b><i>Bradyrhizobium neotropicale</i> BR 10247<sup>T</sup></b>   | + | + | <b>LSEF01000057.1</b> | <b>LSEF01000114.1</b> |
| <i>Bradyrhizobium</i> sp. BR 10245                               | + | + | LUUB01000034.1        | LUUB01000096.1        |
| <i>Bradyrhizobium</i> sp. Ec3.3                                  | + | + | AXAS01000048.1        | AXAS01000025.1        |
| <i>Bradyrhizobium elkanii</i> CCBAU 43297                        | + | - | AJPW01000504.1        | -                     |
| <b><i>Bradyrhizobium elkanii</i> USDA 76<sup>T</sup></b>         | + | - | <b>KB900701.1</b>     | -                     |
| <i>Bradyrhizobium elkanii</i> 587                                | + | - | AJJK01002424          | -                     |
| <i>Bradyrhizobium elkanii</i> BLY6-1                             | + | - | LXEM01000041.1        | -                     |
| <i>Bradyrhizobium elkanii</i> BLY3-8                             | + | - | LWUI01000007.1        | -                     |
| <i>Bradyrhizobium elkanii</i> CCBAU 05737                        | + | - | AJPV01000282.1        | -                     |
| <i>Bradyrhizobium elkanii</i> USDA 94                            | + | - | JAF01000011.1         | -                     |
| <i>Bradyrhizobium elkanii</i> USDA 3254                          | + | - | AXAH01000036.1        | -                     |
| <i>Bradyrhizobium elkanii</i> USDA 3259                          | + | - | AXAW01000035.1        | -                     |
| <b><i>Bradyrhizobium pachyrhizi</i> PAC48<sup>T</sup></b>        | + | - | <b>LFIQ01000120.1</b> | -                     |
| <i>Bradyrhizobium</i> sp. R5                                     | + | - | FMZW01000021.1        | -                     |

|                                                                 |   |   |                       |   |
|-----------------------------------------------------------------|---|---|-----------------------|---|
| <i>Bradyrhizobium pachyrhizi</i> BR3262                         | + | - | LJYE01000083.1        | - |
| <i>Bradyrhizobium erythrophlei</i> MT12                         | + | - | <b>FNTH01000001.1</b> | - |
| <b><i>Bradyrhizobium embrapense</i> SEMIA 6208<sup>T</sup></b>  | + | - | <b>LFIP02000003.1</b> | - |
| <b><i>Bradyrhizobium tropiciagri</i> SEMIA 6148<sup>T</sup></b> | + | - | <b>LFIP02000003.1</b> | - |
| <b><i>Bradyrhizobium viridifuturi</i> SEMIA 690<sup>T</sup></b> | + | - | <b>LGTB01000070.1</b> | - |
| <i>Bradyrhizobium</i> sp. 17-4                                  | + | - | BBEX01000323          | - |
| <i>Bradyrhizobium</i> sp. DFCI-1                                | + | - | KE747856.1            | - |
| <i>Bradyrhizobium</i> sp. th.b2                                 | + | - | KE384569.1            | - |
| <i>Bradyrhizobium elkanii</i> UASWS1015                         | + | - | JXOF01000179.1        | - |
| <i>Bradyrhizobium</i> sp. OHSU III                              | + | - | APJD01000008.1        | - |
| <i>Bradyrhizobium</i> sp. LTSP885                               | + | - | JYMT01000040.1        | - |
| <i>Bradyrhizobium</i> sp. LTSPM299                              | + | - | JYMU01000006.1        | - |
| <i>Bradyrhizobium</i> sp. BR 10303                              | + | - | LNCU01000116.1        | - |
| <i>Bradyrhizobium elkanii</i> WSM2783                           | + | - | AXAP01000001.1        | - |
| <i>Bradyrhizobium</i> sp. Ai1a-2                                | + | - | AUEZ01000036.1        | - |
| <i>Bradyrhizobium</i> sp. STM 3809                              | + | - | CAFJ010000695.1       | - |
| <i>Bradyrhizobium</i> sp. ORS 278                               | + | - | CU234118.1            | - |
| <i>Bradyrhizobium</i> sp. ORS 375                               | + | - | CAFI01000219.1        | - |
| <i>Bradyrhizobium</i> sp. ORS 285                               | + | - | LT859959.1            | - |
| <b><i>Bradyrhizobium oligotrophicum</i> S58<sup>T</sup></b>     | + | - | <b>NC_020453.1</b>    | - |
| <i>Bradyrhizobium</i> sp. BTAi1                                 | + | - | CP000494.1            | - |
| <i>Bradyrhizobium</i> sp. STM 3843                              | + | - | CAFK01000334.1        | - |
| <i>Bradyrhizobium</i> sp. Tv2a-2                                | + | - | AXAI01000011.1        | - |
| <i>Bradyrhizobium</i> sp. ARR65                                 | + | - | AWZU01000062.1        | - |
| <i>Bradyrhizobium</i> sp. LMTR 3                                | + | - | MAXC01000053.1        | - |
| <b><i>Bradyrhizobium retamae</i> Ro19<sup>T</sup></b>           | + | - | <b>LLYA01000191.1</b> | - |
| <i>Bradyrhizobium elkanii</i> WSM1741                           | + | - | AXAU01000009.1        | - |
| <b><i>Bradyrhizobium icense</i> LMTR 13<sup>T</sup></b>         | + | - | <b>CP016428</b>       | - |
| <i>Bradyrhizobium valentinum</i> LmjM6                          | + | - | LLXY01000001.1        | - |
| <b><i>Bradyrhizobium valentinum</i> LmjM3<sup>T</sup></b>       | + | - | <b>LLXX01000235.1</b> | - |
| <b><i>Bradyrhizobium paxllaeri</i> LMTR 21<sup>T</sup></b>      | + | - | <b>MAXB01000079.1</b> | - |
| <b><i>Bradyrhizobium jicamae</i> PAC68<sup>T</sup></b>          | + | - | LLXZ01000016.1        | - |
| <i>Bradyrhizobium lablabi</i> GAS522                            | + | - | FNTI01000001.1        | - |
| <i>Bradyrhizobium ottawaense</i> GAS524                         | + | - | LT629693.1            | - |
| <i>Bradyrhizobium</i> sp. URHA0002                              | + | - | AUES01000035.1        | - |
| <i>Bradyrhizobium erythrophlei</i> GAS138                       | + | - | LT670817.1            | - |
| <i>Bradyrhizobium</i> sp. URHD0069                              | + | - | JNIJ01000018.1        | - |
| <i>Bradyrhizobium erythrophlei</i> GAS242                       | + | - | LT670818.1            | - |
| <i>Bradyrhizobium canariense</i> GAS369                         | + | - | LT629750.1            | - |
| <i>Bradyrhizobium erythrophlei</i> GAS401                       | + | - | LT670849.1            | - |
| <i>Bradyrhizobium</i> sp. CCH4-A6                               | + | - | LSIM01000119.1        | - |
| <i>Bradyrhizobium</i> sp. CCH10-C7                              | + | - | LSIN01000025.1        | - |

<sup>b</sup>Genomes downloaded from the JGI IMG.  
Type strains are indicated with <sup>T</sup> and bold.
