# Supplementary material for: Phylogenomic Analyses of Bradyrhizobium Reveal Uneven Distribution of the Lateral and Subpolar Flagellar Systems, Which Extends to Rhizobiales
Source: MDPI journal article supplement (doi:10.3390/microorganisms7020050), 2019-02-13
Supplement: s1 [file s1]

**Supplementary Table S4.** Blastx of 13 lateral flagellum genes of 10 representative Rhizobiales genomes against the nr NCBI protein database excluding *Rhizobiales* order genomes. Only first 3 genera hits are shown. Best blast hit of each gene is indicated in green.

| Gene        | Query                                                      | Subject species                   | % identity | % cover. | e-value  | Subject Accs. No. |
|-------------|------------------------------------------------------------|-----------------------------------|------------|----------|----------|-------------------|
| <i>fliR</i> | <i>Bradyrhizobium diazoefficiens</i> USDA 110 <sup>T</sup> | <i>Labrenzia</i> sp. VG12         | 50%        | 86%      | 4.00E-68 | WP_094070877.1    |
|             |                                                            | <i>Pannonibacter phragmitetus</i> | 44%        | 96%      | 6.00E-62 | WP_050474407.1    |
|             |                                                            | <i>Polymorphum gilvum</i>         | 47%        | 96%      | 7.00E-56 | WP_013654593.1    |
|             | <i>Rhodopseudomonas palustris</i> BisA53                   | <i>Labrenzia alexandrii</i>       | 50%        | 97%      | 6.00E-65 | WP_008194671.1    |
|             |                                                            | <i>Pannonibacter phragmitetus</i> | 47%        | 95%      | 3.00E-61 | WP_050474407.1    |
|             |                                                            | <i>Polymorphum gilvum</i>         | 48%        | 96%      | 1.00E-52 | WP_013654593.1    |
|             | <i>Pleomorphomonas oryzae</i> DSM 16300 <sup>T</sup>       | <i>Pannonibacter phragmitetus</i> | 49%        | 96%      | 2.00E-60 | WP_050474407.1    |
|             |                                                            | <i>Labrenzia alexandrii</i>       | 47%        | 96%      | 2.00E-56 | WP_008194671.1    |
|             |                                                            | <i>Pseudomonas bauzanensis</i>    | 45%        | 96%      | 2.00E-51 | EZQ16437.1        |
|             | <i>Cohaesibacter marisflavi</i> CGMCC 1.9157 <sup>T</sup>  | <i>Labrenzia</i> sp. OB1          | 51%        | 93%      | 2.00E-71 | KZM48079.1        |
|             |                                                            | <i>Pannonibacter phragmitetus</i> | 46%        | 94%      | 3.00E-66 | WP_019963526.1    |
|             |                                                            | <i>Polymorphum gilvum</i>         | 44%        | 94%      | 1.00E-54 | WP_013654593.1    |
|             | <i>Methylobacterium extorquens</i> DM4 <sup>T</sup>        | <i>Labrenzia alexandrii</i>       | 49%        | 97%      | 2.00E-81 | WP_008194671.1    |
|             |                                                            | <i>Pannonibacter phragmitetus</i> | 47%        | 97%      | 5.00E-76 | WP_019963526.1    |
|             |                                                            | <i>Polymorphum gilvum</i>         | 48%        | 96%      | 1.00E-66 | WP_013654593.1    |
|             | <i>Microvirga massiliensis</i> JC119 <sup>T</sup>          | <i>Labrenzia marina</i>           | 51%        | 98%      | 1.00E-71 | WP_103223518.1    |
|             |                                                            | <i>Pannonibacter indicus</i>      | 46%        | 97%      | 4.00E-64 | WP_055457255.1    |
|             |                                                            | <i>Polymorphum gilvum</i>         | 47%        | 97%      | 3.00E-62 | WP_013654593.1    |
|             | <i>Bosea vaviloviae</i> Vaf-18 <sup>T</sup>                | <i>Pannonibacter phragmitetus</i> | 51%        | 97%      | 9.00E-73 | WP_019963526.1    |
|             |                                                            | <i>Labrenzia</i> sp. OB1          | 51%        | 96%      | 3.00E-72 | KZM48079.1        |
|             |                                                            | <i>Polymorphum gilvum</i>         | 52%        | 97%      | 1.00E-69 | WP_013654593.1    |
|             | <i>Methyloferula stellata</i> AR4 <sup>T</sup>             | <i>Labrenzia aggregata</i>        | 53%        | 97%      | 1.00E-76 | WP_006934609.1    |
|             |                                                            | <i>Pannonibacter phragmitetus</i> | 48%        | 99%      | 3.00E-72 | WP_050474407.1    |
|             |                                                            | <i>Pseudomonas bauzanensis</i>    | 49%        | 96%      | 2.00E-61 | EZQ16437.1        |
|             | <i>Methylocella sylvestris</i> BL2 <sup>T</sup>            | <i>Labrenzia</i> sp. OB1          | 46%        | 98%      | 1.00E-54 | KZM48079.1        |

|                                                            |                                    |     |     |          |                |
|------------------------------------------------------------|------------------------------------|-----|-----|----------|----------------|
| <i>Rhizobium etli</i> CFN42 <sup>T</sup>                   | <i>Pseudomonas bauzanensis</i>     | 46% | 96% | 5.00E-51 | EZQ16437.1     |
|                                                            | <i>Pannonibacter phragmitetus</i>  | 42% | 98% | 6.00E-51 | WP_050474407.1 |
|                                                            | <i>Pseudomonas bauzanensis</i>     | 41% | 97% | 2.00E-60 | EZQ16437.1     |
|                                                            | <i>Ahrensia kielensis</i>          | 40% | 98% | 2.00E-55 | WP_018690483.1 |
|                                                            | <i>Pannonibacter phragmitetus</i>  | 37% | 94% | 2.00E-47 | WP_050474407.1 |
| <i>Bradyrhizobium diazoefficiens</i> USDA 110 <sup>T</sup> | <i>Pannonibacter phragmitetus</i>  | 69% | 91% | 0        | WP_019963527.1 |
|                                                            | <i>Labrenzia</i> sp. VG12          | 67% | 99% | 0        | WP_094070878.1 |
|                                                            | <i>Polymorphum gilvum</i>          | 68% | 91% | 0        | WP_013654594.1 |
| <i>Rhodopseudomonas palustris</i> BisA53                   | <i>Labrenzia aggregata</i>         | 68% | 98% | 0        | WP_040439904.1 |
|                                                            | <i>Stappia aggregata</i> IAM 12614 | 68% | 98% | 0        | EAV44093.1     |
|                                                            | <i>Pannonibacter phragmitetus</i>  | 68% | 98% | 0        | WP_019963527.1 |
| <i>Pleomorphomonas oryzae</i> DSM 16300 <sup>T</sup>       | <i>Labrenzia aggregata</i>         | 72% | 99% | 0        | WP_040439904.1 |
|                                                            | <i>Stappia aggregata</i> IAM 12614 | 72% | 99% | 0        | EAV44093.1     |
|                                                            | <i>Pannonibacter phragmitetus</i>  | 72% | 98% | 0        | WP_019963527.1 |
| <i>Cohaesibacter marisflavi</i> CGMCC 1.9157 <sup>T</sup>  | <i>Pannonibacter phragmitetus</i>  | 73% | 99% | 0        | WP_019963527.1 |
|                                                            | <i>Labrenzia marina</i>            | 73% | 99% | 0        | WP_103223519.1 |
|                                                            | <i>Polymorphum gilvum</i>          | 74% | 99% | 0        | WP_013654594.1 |
| <i>Methylobacterium extorquens</i> DM4 <sup>T</sup>        | <i>Pannonibacter phragmitetus</i>  | 73% | 98% | 0        | WP_019963527.1 |
|                                                            | <i>Polymorphum gilvum</i>          | 72% | 98% | 0        | WP_013654594.1 |
|                                                            | <i>Labrenzia alexandrii</i>        | 71% | 98% | 0        | WP_008192641.1 |
| <i>Microvirga massiliensis</i> JC119 <sup>T</sup>          | <i>Labrenzia</i> sp. VG12          | 73% | 98% | 0        | WP_094070878.1 |
|                                                            | <i>Polymorphum gilvum</i>          | 72% | 98% | 0        | WP_013654594.1 |
|                                                            | <i>Pannonibacter phragmitetus</i>  | 72% | 98% | 0        | WP_019963527.1 |
| <i>Bosea vaviloviae</i> Vaf-18 <sup>T</sup>                | <i>Polymorphum gilvum</i>          | 72% | 98% | 0        | WP_013654594.1 |
|                                                            | <i>Labrenzia</i> sp. VG12          | 70% | 99% | 0        | WP_094070878.1 |
|                                                            | <i>Pannonibacter phragmitetus</i>  | 71% | 98% | 0        | WP_019963527.1 |
| <i>Methyloferula stellata</i> AR4 <sup>T</sup>             | <i>Pannonibacter phragmitetus</i>  | 72% | 99% | 0        | WP_050474406.1 |
|                                                            | <i>Labrenzia alexandrii</i>        | 70% | 99% | 0        | WP_008192641.1 |
|                                                            | <i>Polymorphum gilvum</i>          | 72% | 99% | 0        | WP_013654594.1 |

|                                                            |                                    |     |     |          |                |
|------------------------------------------------------------|------------------------------------|-----|-----|----------|----------------|
| <i>Methylocella sylvestris</i> BL2 <sup>T</sup>            | <i>Pannonibacter phragmitetus</i>  | 71% | 99% | 0        | WP_050474406.1 |
|                                                            | <i>Labrenzia</i> sp. VG12          | 69% | 99% | 0        | WP_094070878.1 |
|                                                            | <i>Stappia aggregata</i> IAM 12614 | 70% | 99% | 0        | EAV44093.1     |
|                                                            | <i>Pseudomonas bauzanensis</i>     | 73% | 93% | 0        | EZQ16438.1     |
| <i>Rhizobium etli</i> CFN42 <sup>T</sup>                   | <i>Polymorphum gilvum</i>          | 69% | 93% | 0        | WP_013654594.1 |
|                                                            | <i>Labrenzia marina</i>            | 67% | 93% | 0        | WP_103223519.1 |
| <i>Bradyrhizobium diazoefficiens</i> USDA 110 <sup>T</sup> | <i>Pseudovibrio stylochi</i>       | 67% | 98% | 3.00E-27 | WP_068082022.1 |
|                                                            | <i>Nesiotobacter exalbescens</i>   | 64% | 98% | 3.00E-25 | WP_028482867.1 |
|                                                            | <i>Polymorphum gilvum</i>          | 64% | 98% | 2.00E-23 | WP_013654598.1 |
|                                                            | <i>Pseudovibrio stylochi</i>       | 69% | 98% | 3.00E-39 | WP_068082022.1 |
| <i>Rhodopseudomonas palustris</i> BisA53                   | <i>Nesiotobacter exalbescens</i>   | 69% | 98% | 3.00E-37 | WP_028482867.1 |
|                                                            | <i>Labrenzia</i> sp. VG12          | 65% | 98% | 2.00E-34 | WP_094070879.1 |
|                                                            | <i>Polymorphum gilvum</i>          | 78% | 98% | 1.00E-40 | WP_013654598.1 |
| <i>Pleomorphomonas oryzae</i> DSM 16300 <sup>T</sup>       | <i>Labrenzia aggregata</i>         | 76% | 98% | 5.00E-40 | WP_006934616.1 |
|                                                            | <i>Pannonibacter phragmitetus</i>  | 76% | 98% | 2.00E-39 | WP_050474405.1 |
|                                                            | <i>Pseudovibrio stylochi</i>       | 67% | 98% | 2.00E-35 | WP_068082022.1 |
| <i>Cohaesibacter marisflavi</i> CGMCC 1.9157 <sup>T</sup>  | <i>Labrenzia</i>                   | 61% | 98% | 3.00E-33 | WP_022998516.1 |
|                                                            | <i>Nesiotobacter exalbescens</i>   | 64% | 98% | 3.00E-33 | WP_028482867.1 |
|                                                            | <i>Pseudovibrio stylochi</i>       | 67% | 98% | 2.00E-36 | WP_068082022.1 |
| <i>Methylobacterium extorquens</i> DM4 <sup>T</sup>        | <i>Polymorphum gilvum</i>          | 66% | 98% | 2.00E-35 | WP_013654598.1 |
|                                                            | <i>Nesiotobacter exalbescens</i>   | 66% | 98% | 3.00E-35 | WP_028482867.1 |
|                                                            | <i>Nesiotobacter exalbescens</i>   | 68% | 98% | 3.00E-37 | WP_028482867.1 |
| <i>Microvirga massiliensis</i> JC119 <sup>T</sup>          | <i>Pseudovibrio axinellae</i>      | 68% | 98% | 2.00E-36 | WP_068007089.1 |
|                                                            | <i>Polymorphum gilvum</i>          | 67% | 98% | 1.00E-34 | WP_013654598.1 |
|                                                            | <i>Nesiotobacter exalbescens</i>   | 74% | 98% | 2.00E-29 | WP_028482867.1 |
| <i>Bosea vaviloviae</i> Vaf-18 <sup>T</sup>                | <i>Pseudovibrio hongkongensis</i>  | 68% | 98% | 4.00E-29 | WP_068316686.1 |
|                                                            | <i>Polymorphum gilvum</i>          | 64% | 98% | 1.00E-25 | WP_013654598.1 |
|                                                            | <i>Nesiotobacter exalbescens</i>   | 67% | 98% | 3.00E-38 | WP_028482867.1 |
| <i>Methyloferula stellata</i> AR4 <sup>T</sup>             | <i>Pseudovibrio axinellae</i>      | 63% | 98% | 4.00E-36 | WP_068007089.1 |

|      |                                                            |                                   |     |     |           |                |
|------|------------------------------------------------------------|-----------------------------------|-----|-----|-----------|----------------|
| fliF | <i>Methylocella sylvestris</i> BL2 <sup>T</sup>            | <i>Labrenzia aggregata</i>        | 61% | 98% | 1.00E-34  | WP_006934616.1 |
|      |                                                            | <i>Pseudovibrio axinellae</i>     | 74% | 98% | 1.00E-27  | WP_068007089.1 |
|      |                                                            | <i>Polymorphum gilvum</i>         | 68% | 98% | 7.00E-24  | WP_013654598.1 |
|      |                                                            | <i>Pannonibacter phragmitetus</i> | 65% | 98% | 2.00E-22  | WP_050474405.1 |
|      | <i>Rhizobium etli</i> CFN42 <sup>T</sup>                   | <i>Nesiotobacter exalbescens</i>  | 64% | 98% | 6.00E-34  | WP_028482867.1 |
|      |                                                            | <i>Labrenzia</i> sp. VG12         | 63% | 98% | 4.00E-33  | WP_094070879.1 |
|      |                                                            | <i>Polymorphum gilvum</i>         | 64% | 98% | 5.00E-33  | WP_013654598.1 |
|      | <i>Bradyrhizobium diazoefficiens</i> USDA 110 <sup>T</sup> | <i>Polymorphum gilvum</i>         | 55% | 94% | 0         | WP_013654610.1 |
|      |                                                            | <i>Pannonibacter phragmitetus</i> | 53% | 94% | 0         | WP_019963540.1 |
|      |                                                            | <i>Labrenzia aggregata</i>        | 53% | 94% | 0         | WP_055654459.1 |
|      |                                                            | <i>Polymorphum gilvum</i>         | 54% | 99% | 4.00E-166 | WP_013654610.1 |
|      | <i>Rhodopseudomonas palustris</i> BisA53                   | <i>Pannonibacter phragmitetus</i> | 53% | 99% | 8.00E-164 | WP_058898120.1 |
|      |                                                            | <i>Labrenzia aggregata</i>        | 52% | 99% | 6.00E-163 | WP_055654459.1 |
|      |                                                            | <i>Labrenzia</i> sp. VG12         | 57% | 99% | 0         | WP_094070890.1 |
|      | <i>Pleomorphomonas oryzae</i> DSM 16300 <sup>T</sup>       | <i>Polymorphum gilvum</i>         | 56% | 99% | 3.00E-179 | WP_013654610.1 |
|      |                                                            | <i>Pannonibacter phragmitetus</i> | 56% | 99% | 6.00E-177 | WP_058898120.1 |
|      |                                                            | <i>Pannonibacter phragmitetus</i> | 61% | 99% | 0         | WP_058898120.1 |
|      | <i>Cohaesibacter marisflavi</i> CGMCC 1.9157 <sup>T</sup>  | <i>Polymorphum gilvum</i>         | 60% | 99% | 0         | WP_013654610.1 |
|      |                                                            | <i>Labrenzia</i> sp. VG12         | 59% | 99% | 0         | WP_094070890.1 |
|      |                                                            | <i>Polymorphum gilvum</i>         | 55% | 99% | 2.00E-179 | WP_013654610.1 |
|      | <i>Methylobacterium extorquens</i> DM4 <sup>T</sup>        | <i>Labrenzia aggregata</i>        | 54% | 99% | 8.00E-178 | WP_055654459.1 |
|      |                                                            | <i>Pannonibacter phragmitetus</i> | 52% | 99% | 2.00E-166 | WP_019963540.1 |
|      |                                                            | <i>Polymorphum gilvum</i>         | 57% | 99% | 0         | WP_013654610.1 |
|      | <i>Microvirga massiliensis</i> JC119 <sup>T</sup>          | <i>Pannonibacter phragmitetus</i> | 56% | 99% | 0         | WP_019963540.1 |
|      |                                                            | <i>Labrenzia aggregata</i>        | 56% | 99% | 0         | WP_055654459.1 |
|      |                                                            | <i>Labrenzia aggregata</i>        | 55% | 99% | 0         | WP_055654459.1 |
|      | <i>Bosea vaviloviae</i> Vaf-18 <sup>T</sup>                | <i>Pannonibacter phragmitetus</i> | 56% | 99% | 0         | WP_019963540.1 |
|      |                                                            | <i>Polymorphum gilvum</i>         | 56% | 99% | 0         | WP_013654610.1 |
|      | <i>Methyloferula stellata</i> AR4 <sup>T</sup>             | <i>Labrenzia aggregata</i>        | 55% | 99% | 0         | WP_055654459.1 |

|      |                                                            |                                   |     |     |           |                |
|------|------------------------------------------------------------|-----------------------------------|-----|-----|-----------|----------------|
|      | <i>Methylocella sylvestris</i> BL2 <sup>T</sup>            | <i>Polymorphum gilvum</i>         | 57% | 99% | 2.00E-180 | WP_013654610.1 |
|      |                                                            | <i>Pannonibacter phragmitetus</i> | 54% | 99% | 2.00E-167 | WP_019963540.1 |
|      |                                                            | <i>Labrenzia alexandrii</i>       | 56% | 99% | 0         | WP_055673358.1 |
|      |                                                            | <i>Polymorphum gilvum</i>         | 57% | 99% | 0         | WP_013654610.1 |
|      |                                                            | <i>Pannonibacter phragmitetus</i> | 54% | 99% | 3.00E-176 | WP_019963540.1 |
|      |                                                            | <i>Pseudomonas bauzanensis</i>    | 48% | 97% | 6.00E-159 | EZQ16450.1     |
|      | <i>Rhizobium etli</i> CFN42 <sup>T</sup>                   | <i>Nesiotobacter exalbescens</i>  | 48% | 80% | 2.00E-130 | WP_028482879.1 |
|      |                                                            | <i>Pseudovibrio stylochi</i>      | 43% | 97% | 2.00E-125 | WP_068082061.1 |
|      |                                                            | <i>Labrenzia aggregata</i>        | 74% | 91% | 3.00E-111 | WP_006934633.1 |
|      | <i>Bradyrhizobium diazoefficiens</i> USDA 110 <sup>T</sup> | <i>Polymorphum gilvum</i>         | 73% | 90% | 1.00E-107 | WP_013654612.1 |
|      |                                                            | <i>Nesiotobacter exalbescens</i>  | 72% | 91% | 3.00E-107 | OKL43095.1     |
|      |                                                            | <i>Labrenzia aggregata</i>        | 72% | 98% | 3.00E-115 | WP_006934633.1 |
|      | <i>Rhodopseudomonas palustris</i> BisA53                   | <i>Polymorphum gilvum</i>         | 75% | 91% | 5.00E-112 | WP_013654612.1 |
|      |                                                            | <i>Nesiotobacter exalbescens</i>  | 72% | 93% | 2.00E-110 | OKL43095.1     |
|      |                                                            | <i>Pannonibacter phragmitetus</i> | 78% | 94% | 1.00E-120 | WP_058898122.1 |
|      | <i>Pleomorphomonas oryzae</i> DSM 16300 <sup>T</sup>       | <i>Labrenzia marina</i>           | 77% | 93% | 8.00E-119 | WP_103223635.1 |
|      |                                                            | <i>Polymorphum gilvum</i>         | 78% | 93% | 4.00E-118 | WP_013654612.1 |
|      |                                                            | <i>Labrenzia marina</i>           | 74% | 91% | 1.00E-120 | POF30148.1     |
| fliP | <i>Cohaesibacter marisflavi</i> CGMCC 1.9157 <sup>T</sup>  | <i>Pannonibacter phragmitetus</i> | 74% | 90% | 1.00E-118 | WP_058898122.1 |
|      |                                                            | <i>Polymorphum gilvum</i>         | 72% | 91% | 9.00E-117 | WP_013654612.1 |
|      |                                                            | <i>Labrenzia aggregata</i>        | 74% | 84% | 7.00E-112 | WP_006934633.1 |
|      | <i>Methylobacterium extorquens</i> DM4 <sup>T</sup>        | <i>Pannonibacter phragmitetus</i> | 74% | 84% | 2.00E-111 | WP_094463440.1 |
|      |                                                            | <i>Polymorphum gilvum</i>         | 74% | 84% | 2.00E-110 | WP_013654612.1 |
|      |                                                            | <i>Labrenzia aggregata</i>        | 72% | 90% | 7.00E-107 | WP_006934633.1 |
|      | <i>Microvirga massiliensis</i> JC119 <sup>T</sup>          | <i>Polymorphum gilvum</i>         | 71% | 91% | 2.00E-103 | WP_013654612.1 |
|      |                                                            | <i>Stappia</i> sp. 22II-S9-Z10    | 71% | 90% | 5.00E-103 | ORE95796.1     |
|      |                                                            | <i>Labrenzia aggregata</i>        | 72% | 95% | 1.00E-106 | WP_006934633.1 |
|      | <i>Bosea vaviloviae</i> Vaf-18 <sup>T</sup>                | <i>Pannonibacter phragmitetus</i> | 71% | 94% | 9.00E-103 | WP_019963542.1 |
|      |                                                            | <i>Polymorphum gilvum</i>         | 73% | 84% | 2.00E-102 | WP_013654612.1 |

|      |                                                            |                                   |     |     |           |                |
|------|------------------------------------------------------------|-----------------------------------|-----|-----|-----------|----------------|
|      |                                                            | <i>Labrenzia aggregata</i>        | 71% | 95% | 1.00E-105 | WP_006934633.1 |
|      | <i>Methyloferula stellata</i> AR4 <sup>T</sup>             | <i>Polymorphum gilvum</i>         | 74% | 91% | 4.00E-102 | WP_013654612.1 |
|      |                                                            | <i>Pannonibacter phragmitetus</i> | 69% | 93% | 8.00E-99  | WP_058898122.1 |
|      |                                                            | <i>Labrenzia</i> sp. VG12         | 71% | 91% | 3.00E-96  | WP_094074561.1 |
|      | <i>Methylocella sylvestris</i> BL2 <sup>T</sup>            | <i>Polymorphum gilvum</i>         | 73% | 83% | 3.00E-94  | WP_013654612.1 |
|      |                                                            | <i>Pannonibacter phragmitetus</i> | 73% | 83% | 4.00E-94  | WP_094463440.1 |
|      |                                                            | <i>Pseudomonas bauzanensis</i>    | 72% | 92% | 7.00E-112 | EZQ16453.1     |
|      | <i>Rhizobium etli</i> CFN42 <sup>T</sup>                   | <i>Ahrensia marina</i>            | 68% | 97% | 7.00E-110 | WP_053999577.1 |
|      |                                                            | <i>Labrenzia marina</i>           | 65% | 99% | 2.00E-101 | POF30148.1     |
|      |                                                            | <i>Pannonibacter phragmitetus</i> | 49% | 93% | 2.00E-64  | WP_026355489.1 |
|      | <i>Bradyrhizobium diazoefficiens</i> USDA 110 <sup>T</sup> | <i>Pseudovibrio</i> sp. Ab134     | 52% | 88% | 5.00E-64  | WP_075698969.1 |
|      |                                                            | <i>Labrenzia alexandrii</i>       | 50% | 93% | 3.00E-62  | WP_008192303.1 |
|      |                                                            | <i>Labrenzia marina</i>           | 55% | 89% | 3.00E-64  | WP_103223535.1 |
|      | <i>Rhodopseudomonas palustris</i> BisA53                   | <i>Nesiotobacter exalbescens</i>  | 50% | 89% | 3.00E-63  | WP_036490176.1 |
|      |                                                            | <i>Pannonibacter phragmitetus</i> | 53% | 89% | 3.00E-62  | WP_026355489.1 |
|      |                                                            | <i>Nesiotobacter exalbescens</i>  | 50% | 93% | 4.00E-63  | WP_036490176.1 |
|      | <i>Pleomorphomonas oryzae</i> DSM 16300 <sup>T</sup>       | <i>Pannonibacter phragmitetus</i> | 52% | 93% | 1.00E-58  | WP_050474389.1 |
|      |                                                            | <i>Labrenzia marina</i>           | 53% | 93% | 4.00E-58  | WP_103223535.1 |
| flgH |                                                            | <i>Pannonibacter phragmitetus</i> | 55% | 97% | 3.00E-77  | WP_050474389.1 |
|      | <i>Cohaesibacter marisflavi</i> CGMCC 1.9157 <sup>T</sup>  | <i>Nesiotobacter exalbescens</i>  | 55% | 93% | 2.00E-75  | WP_036490176.1 |
|      |                                                            | <i>Labrenzia</i> sp. VG12         | 54% | 97% | 2.00E-74  | WP_094070893.1 |
|      |                                                            | <i>Pseudovibrio stylochi</i>      | 52% | 93% | 1.00E-61  | WP_068082075.1 |
|      | <i>Methylobacterium extorquens</i> DM4 <sup>T</sup>        | <i>Nesiotobacter exalbescens</i>  | 52% | 92% | 1.00E-60  | WP_036490176.1 |
|      |                                                            | <i>Pannonibacter phragmitetus</i> | 52% | 92% | 1.00E-57  | WP_026355489.1 |
|      |                                                            | <i>Pseudomonas bauzanensis</i>    | 52% | 99% | 2.00E-73  | EZQ16455.1     |
|      | <i>Microvirga massiliensis</i> JC119 <sup>T</sup>          | <i>Labrenzia marina</i>           | 57% | 88% | 2.00E-70  | WP_103223535.1 |
|      |                                                            | <i>Nesiotobacter exalbescens</i>  | 53% | 90% | 6.00E-69  | WP_036490176.1 |
|      |                                                            | <i>Polymorphum gilvum</i>         | 55% | 99% | 5.00E-71  | WP_013654614.1 |
|      | <i>Bosea vaviloviae</i> Vaf-18 <sup>T</sup>                | <i>Nesiotobacter exalbescens</i>  | 53% | 95% | 1.00E-70  | WP_036490176.1 |

|                                                            |                                    |     |     |           |                |
|------------------------------------------------------------|------------------------------------|-----|-----|-----------|----------------|
| <i>Methyloferula stellata</i> AR4 <sup>T</sup>             | <i>Labrenzia marina</i>            | 53% | 99% | 1.00E-67  | WP_103223535.1 |
|                                                            | <i>Pannonibacter phragmitetus</i>  | 50% | 99% | 3.00E-73  | WP_026355489.1 |
|                                                            | <i>Labrenzia aggregata</i>         | 53% | 99% | 1.00E-72  | WP_040439910.1 |
|                                                            | <i>Stappia aggregata</i> IAM 12614 | 54% | 96% | 3.00E-71  | EAV44111.1     |
| <i>Methylocella sylvestris</i> BL2 <sup>T</sup>            | <i>Polymorphum gilvum</i>          | 56% | 93% | 1.00E-76  | WP_013654614.1 |
|                                                            | <i>Pannonibacter phragmitetus</i>  | 53% | 97% | 1.00E-75  | WP_050474389.1 |
|                                                            | <i>Labrenzia marina</i>            | 51% | 99% | 7.00E-75  | WP_103223535.1 |
| <i>Rhizobium etli</i> CFN42 <sup>T</sup>                   | <i>Pseudomonas bauzanensis</i>     | 50% | 92% | 2.00E-66  | EZQ16455.1     |
|                                                            | <i>Pseudovibrio hongkongensis</i>  | 47% | 89% | 4.00E-62  | WP_068317312.1 |
|                                                            | <i>Polymorphum gilvum</i>          | 50% | 89% | 5.00E-60  | WP_013654614.1 |
| <i>Bradyrhizobium diazoefficiens</i> USDA 110 <sup>T</sup> | <i>Polymorphum gilvum</i>          | 64% | 94% | 7.00E-152 | WP_013654616.1 |
|                                                            | <i>Pannonibacter indicus</i>       | 65% | 94% | 8.00E-152 | WP_055454342.1 |
|                                                            | <i>Labrenzia marina</i>            | 62% | 94% | 2.00E-149 | WP_103223537.1 |
| <i>Rhodopseudomonas palustris</i> BisA53                   | <i>Polymorphum gilvum</i>          | 70% | 93% | 1.00E-139 | WP_013654616.1 |
|                                                            | <i>Labrenzia alexandrii</i>        | 68% | 99% | 3.00E-136 | CTQ75041.1     |
|                                                            | <i>Pannonibacter indicus</i>       | 71% | 93% | 4.00E-134 | WP_055454342.1 |
| <i>Pleomorphomonas oryzae</i> DSM 16300 <sup>T</sup>       | <i>Labrenzia aggregata</i>         | 68% | 89% | 1.00E-157 | WP_006934650.1 |
|                                                            | <i>Pannonibacter indicus</i>       | 69% | 89% | 2.00E-154 | WP_055454342.1 |
|                                                            | <i>Polymorphum gilvum</i>          | 67% | 89% | 5.00E-152 | WP_013654616.1 |
|                                                            | <i>Polymorphum gilvum</i>          | 68% | 93% | 2.00E-144 | WP_013654616.1 |
| <i>Cohaesibacter marisflavi</i> CGMCC 1.9157 <sup>T</sup>  | <i>Labrenzia aggregata</i>         | 66% | 94% | 2.00E-143 | WP_006934650.1 |
|                                                            | <i>Pannonibacter phragmitetus</i>  | 69% | 93% | 2.00E-142 | WP_050474388.1 |
|                                                            | <i>Pannonibacter phragmitetus</i>  | 68% | 91% | 5.00E-153 | WP_050474388.1 |
| <i>Methylobacterium extorquens</i> DM4 <sup>T</sup>        | <i>Labrenzia alexandrii</i>        | 65% | 94% | 3.00E-151 | CTQ75041.1     |
|                                                            | <i>Polymorphum gilvum</i>          | 66% | 93% | 2.00E-150 | WP_013654616.1 |
|                                                            | <i>Labrenzia alexandrii</i>        | 63% | 99% | 6.00E-152 | CTQ75041.1     |
| <i>Microvirga massiliensis</i> JC119 <sup>T</sup>          | <i>Stappia</i> sp. 22II-S9-Z10     | 65% | 95% | 1.00E-146 | WP_083548138.1 |
|                                                            | <i>Polymorphum gilvum</i>          | 67% | 93% | 2.00E-146 | WP_013654616.1 |
| <i>Bosea vaviloviae</i> Vaf-18 <sup>T</sup>                | <i>Pannonibacter phragmitetus</i>  | 66% | 97% | 9.00E-148 | WP_019963546.1 |

|      |                                                            |                                    |     |     |           |                |
|------|------------------------------------------------------------|------------------------------------|-----|-----|-----------|----------------|
| flgG | <i>Methyloferula stellata</i> AR4 <sup>T</sup>             | <i>Labrenzia alexandrii</i> DFL-11 | 66% | 97% | 6.00E-146 | EEE44706.1     |
|      |                                                            | <i>Polymorphum gilvum</i>          | 66% | 93% | 1.00E-147 | WP_013654616.1 |
|      |                                                            | <i>Labrenzia alexandrii</i>        | 64% | 99% | 8.00E-148 | WP_040451985.1 |
|      |                                                            | <i>Polymorphum gilvum</i>          | 67% | 95% | 1.00E-143 | WP_013654616.1 |
|      |                                                            | <i>Pannonibacter phragmitetus</i>  | 64% | 99% | 2.00E-143 | WP_019963546.1 |
|      | <i>Methylocella sylvestris</i> BL2 <sup>T</sup>            | <i>Labrenzia alexandrii</i> DFL-11 | 62% | 98% | 1.00E-130 | EEE44706.1     |
|      |                                                            | <i>Polymorphum gilvum</i>          | 64% | 94% | 6.00E-126 | WP_013654616.1 |
|      |                                                            | <i>Pannonibacter phragmitetus</i>  | 64% | 93% | 7.00E-126 | WP_050474388.1 |
|      |                                                            | <i>Pseudomonas bauzanensis</i>     | 64% | 93% | 1.00E-151 | EZQ16457.1     |
|      | <i>Rhizobium etli</i> CFN42 <sup>T</sup>                   | <i>Acuticoccus yangtzensis</i>     | 57% | 93% | 1.00E-129 | WP_075221725.1 |
|      |                                                            | <i>Stappia</i> sp. 22II-S9-Z10     | 57% | 93% | 2.00E-129 | WP_083548138.1 |
|      |                                                            | <i>Labrenzia alexandrii</i>        | 66% | 99% | 9.00E-122 | WP_055673361.1 |
|      | <i>Bradyrhizobium diazoefficiens</i> USDA 110 <sup>T</sup> | <i>Polymorphum gilvum</i>          | 68% | 99% | 6.00E-116 | WP_013654618.1 |
|      |                                                            | <i>Pannonibacter phragmitetus</i>  | 67% | 99% | 9.00E-116 | WP_050474386.1 |
|      |                                                            | <i>Labrenzia</i> sp. OB1           | 71% | 99% | 2.00E-130 | WP_068417949.1 |
|      | <i>Rhodopseudomonas palustris</i> BisA53                   | <i>Pannonibacter phragmitetus</i>  | 68% | 99% | 1.00E-122 | WP_050474386.1 |
|      |                                                            | <i>Polymorphum gilvum</i>          | 68% | 99% | 4.00E-122 | WP_013654618.1 |
|      |                                                            | <i>Labrenzia</i> sp. OB1           | 71% | 99% | 2.00E-129 | WP_068417949.1 |
|      | <i>Pleomorphomonas oryzae</i> DSM 16300 <sup>T</sup>       | <i>Pannonibacter phragmitetus</i>  | 72% | 99% | 2.00E-127 | WP_050474386.1 |
|      |                                                            | <i>Polymorphum gilvum</i>          | 71% | 99% | 6.00E-125 | WP_013654618.1 |
|      |                                                            | <i>Labrenzia aggregata</i>         | 71% | 99% | 6.00E-135 | WP_006934654.1 |
|      | <i>Cohaesibacter marisflavi</i> CGMCC 1.9157 <sup>T</sup>  | <i>Pannonibacter phragmitetus</i>  | 73% | 99% | 1.00E-132 | WP_019963548.1 |
|      |                                                            | <i>Polymorphum gilvum</i>          | 74% | 99% | 4.00E-132 | WP_013654618.1 |
|      | <i>Methylobacterium extorquens</i> DM4 <sup>T</sup>        | <i>Labrenzia</i> sp. VG12          | 70% | 99% | 2.00E-133 | WP_094070897.1 |
|      |                                                            | <i>Pannonibacter phragmitetus</i>  | 68% | 99% | 2.00E-127 | WP_050474386.1 |
|      |                                                            | <i>Polymorphum gilvum</i>          | 69% | 99% | 2.00E-127 | WP_013654618.1 |
|      |                                                            | <i>Labrenzia alexandrii</i>        | 68% | 99% | 2.00E-118 | WP_055673361.1 |
|      | <i>Microvirga massiliensis</i> JC119 <sup>T</sup>          | <i>Polymorphum gilvum</i>          | 69% | 99% | 2.00E-116 | WP_013654618.1 |
|      |                                                            | <i>Pannonibacter phragmitetus</i>  | 67% | 99% | 2.00E-111 | WP_050474386.1 |



|                                                            |                                   |     |     |           |                |
|------------------------------------------------------------|-----------------------------------|-----|-----|-----------|----------------|
| <i>Bosea vaviloviae</i> Vaf-18 <sup>T</sup>                | <i>Labrenzia</i> sp. VG12         | 68% | 99% | 4.00E-131 | WP_094070897.1 |
|                                                            | <i>Pannonibacter phragmitetus</i> | 69% | 99% | 1.00E-130 | WP_050474386.1 |
|                                                            | <i>Polymorphum gilvum</i>         | 70% | 99% | 3.00E-130 | WP_013654618.1 |
| <i>Methyloferula stellata</i> AR4 <sup>T</sup>             | <i>Labrenzia marina</i>           | 68% | 98% | 8.00E-114 | WP_103223539.1 |
|                                                            | <i>Polymorphum gilvum</i>         | 66% | 98% | 2.00E-108 | WP_013654618.1 |
|                                                            | <i>Pannonibacter phragmitetus</i> | 66% | 98% | 7.00E-108 | WP_050474386.1 |
| <i>Methylocella sylvestris</i> BL2 <sup>T</sup>            | <i>Labrenzia marina</i>           | 65% | 99% | 2.00E-115 | WP_103223539.1 |
|                                                            | <i>Pannonibacter phragmitetus</i> | 65% | 99% | 9.00E-112 | WP_050474386.1 |
|                                                            | <i>Polymorphum gilvum</i>         | 64% | 99% | 4.00E-111 | WP_013654618.1 |
| <i>Rhizobium etli</i> CFN42 <sup>T</sup>                   | <i>Pseudomonas bauzanensis</i>    | 68% | 99% | 2.00E-120 | EZQ16459.1     |
|                                                            | <i>Ahrensia marina</i>            | 67% | 99% | 5.00E-113 | WP_053999582.1 |
|                                                            | <i>Labrenzia alexandrii</i>       | 62% | 99% | 2.00E-107 | WP_055673361.1 |
| <i>Bradyrhizobium diazoefficiens</i> USDA 110 <sup>T</sup> | <i>Labrenzia aggregata</i>        | 58% | 66% | 7.00E-20  | WP_006934656.1 |
|                                                            | <i>Polymorphum gilvum</i>         | 57% | 62% | 6.00E-17  | WP_013654619.1 |
|                                                            | <i>Pannonibacter phragmitetus</i> | 57% | 65% | 7.00E-17  | KND17501.1     |
| <i>Rhodopseudomonas palustris</i> BisA53                   | <i>Labrenzia aggregata</i>        | 48% | 99% | 1.00E-23  | WP_077292789.1 |
|                                                            | <i>Polymorphum gilvum</i>         | 52% | 99% | 2.00E-23  | WP_013654619.1 |
|                                                            | <i>Pannonibacter phragmitetus</i> | 46% | 99% | 1.00E-19  | ALV26355.1     |
| <i>Pleomorphomonas oryzae</i> DSM 16300 <sup>T</sup>       | <i>Labrenzia aggregata</i>        | 66% | 57% | 3.00E-20  | WP_006934656.1 |
|                                                            | <i>Polymorphum gilvum</i>         | 68% | 57% | 1.00E-19  | WP_013654619.1 |
|                                                            | <i>Pannonibacter phragmitetus</i> | 66% | 57% | 6.00E-19  | KND17501.1     |
| <i>fliE</i>                                                | <i>Polymorphum gilvum</i>         | 50% | 99% | 2.00E-24  | WP_013654619.1 |
| <i>Cohaesibacter marisflavi</i> CGMCC 1.9157 <sup>T</sup>  | <i>Labrenzia alexandrii</i>       | 47% | 95% | 4.00E-23  | WP_008190823.1 |
|                                                            | <i>Pannonibacter phragmitetus</i> | 47% | 99% | 6.00E-22  | ALV26355.1     |
|                                                            | <i>Labrenzia aggregata</i>        | 54% | 67% | 2.00E-21  | WP_077292789.1 |
| <i>Methylobacterium extorquens</i> DM4 <sup>T</sup>        | <i>Polymorphum gilvum</i>         | 45% | 99% | 2.00E-20  | WP_013654619.1 |
|                                                            | <i>Nesiotobacter exalbescens</i>  | 46% | 98% | 5.00E-20  | WP_028482887.1 |
| <i>Microvirga massiliensis</i> JC119 <sup>T</sup>          | <i>Labrenzia aggregata</i>        | 74% | 60% | 3.00E-26  | WP_006934656.1 |
|                                                            | <i>Polymorphum gilvum</i>         | 70% | 60% | 7.00E-24  | WP_013654619.1 |

|      |                                                            |                                   |     |     |          |                |
|------|------------------------------------------------------------|-----------------------------------|-----|-----|----------|----------------|
| flgC |                                                            | <i>Pannonibacter phragmitetus</i> | 71% | 60% | 9.00E-24 | KND17501.1     |
|      |                                                            | <i>Labrenzia</i> sp. VG12         | 45% | 99% | 3.00E-06 | WP_094070898.1 |
|      | <i>Bosea vaviloviae</i> Vaf-18 <sup>T</sup>                | <i>Pannonibacter phragmitetus</i> | 55% | 64% | 3.00E-04 | KND17501.1     |
|      |                                                            | <i>Polymorphum gilvum</i>         | 47% | 99% | 0.003    | WP_013654619.1 |
|      |                                                            | <i>Labrenzia</i> sp. OB1          | 59% | 64% | 1.00E-20 | WP_068417941.1 |
|      | <i>Methyloferula stellata</i> AR4 <sup>T</sup>             | <i>Polymorphum gilvum</i>         | 61% | 64% | 2.00E-19 | WP_013654619.1 |
|      |                                                            | <i>Pannonibacter phragmitetus</i> | 51% | 72% | 6.00E-18 | KND17501.1     |
|      |                                                            | <i>Labrenzia aggregata</i>        | 62% | 69% | 5.00E-23 | WP_077292789.1 |
|      | <i>Methylocella sylvestris</i> BL2 <sup>T</sup>            | <i>Polymorphum gilvum</i>         | 62% | 70% | 8.00E-20 | WP_013654619.1 |
|      |                                                            | <i>Pannonibacter phragmitetus</i> | 58% | 68% | 3.00E-19 | KND17501.1     |
|      |                                                            | <i>Pseudomonas bauzanensis</i>    | 53% | 59% | 1.00E-15 | EZQ16460.1     |
|      | <i>Rhizobium etli</i> CFN42 <sup>T</sup>                   | <i>Ahrensia marina</i>            | 46% | 60% | 4.00E-15 | WP_053999583.1 |
|      |                                                            | <i>Labrenzia aggregata</i>        | 47% | 61% | 8.00E-15 | WP_077292789.1 |
|      |                                                            | <i>Pannonibacter phragmitetus</i> | 66% | 98% | 5.00E-64 | WP_050474385.1 |
|      | <i>Bradyrhizobium diazoefficiens</i> USDA 110 <sup>T</sup> | <i>Polymorphum gilvum</i>         | 64% | 98% | 1.00E-63 | WP_013654620.1 |
|      |                                                            | <i>Labrenzia</i> sp. OB1          | 64% | 99% | 3.00E-60 | WP_068417937.1 |
|      |                                                            | <i>Pannonibacter phragmitetus</i> | 66% | 98% | 4.00E-58 | WP_019963550.1 |
|      | <i>Rhodopseudomonas palustris</i> BisA53                   | <i>Polymorphum gilvum</i>         | 67% | 98% | 2.00E-57 | WP_013654620.1 |
|      |                                                            | <i>Labrenzia</i> sp. OB1          | 67% | 98% | 4.00E-56 | WP_068417937.1 |
|      |                                                            | <i>Pannonibacter indicus</i>      | 64% | 98% | 4.00E-61 | WP_055454345.1 |
|      | <i>Pleomorphomonas oryzae</i> DSM 16300 <sup>T</sup>       | <i>Labrenzia</i> sp. OB1          | 64% | 97% | 6.00E-58 | WP_068417937.1 |
|      |                                                            | <i>Polymorphum gilvum</i>         | 61% | 98% | 1.00E-57 | WP_013654620.1 |
|      |                                                            | <i>Pannonibacter phragmitetus</i> | 74% | 98% | 2.00E-72 | WP_019963550.1 |
|      | <i>Cohaesibacter marisflavi</i> CGMCC 1.9157 <sup>T</sup>  | <i>Polymorphum gilvum</i>         | 69% | 98% | 2.00E-69 | WP_013654620.1 |
|      |                                                            | <i>Labrenzia</i> sp. VG12         | 71% | 99% | 3.00E-67 | WP_094070899.1 |
|      |                                                            | <i>Polymorphum gilvum</i>         | 64% | 98% | 2.00E-52 | WP_013654620.1 |
|      | <i>Methylobacterium extorquens</i> DM4 <sup>T</sup>        | <i>Pannonibacter indicus</i>      | 63% | 98% | 4.00E-51 | WP_055454345.1 |
|      |                                                            | <i>Stappia</i> sp. 22II-S9-Z10    | 67% | 97% | 2.00E-50 | WP_083548139.1 |
|      | <i>Microvirga massiliensis</i> JC119 <sup>T</sup>          | <i>Pannonibacter phragmitetus</i> | 74% | 98% | 2.00E-69 | WP_019963550.1 |

|             |                                                            |                                   |     |     |          |                |
|-------------|------------------------------------------------------------|-----------------------------------|-----|-----|----------|----------------|
|             | <i>Bosea vaviloviae</i> Vaf-18 <sup>T</sup>                | <i>Polymorphum gilvum</i>         | 70% | 98% | 3.00E-68 | WP_013654620.1 |
|             |                                                            | <i>Pseudovibrio axinellae</i>     | 69% | 98% | 2.00E-63 | WP_068010184.1 |
|             |                                                            | <i>Pannonibacter indicus</i>      | 69% | 98% | 3.00E-67 | WP_055454345.1 |
|             |                                                            | <i>Nesiotobacter exalbescens</i>  | 67% | 98% | 2.00E-64 | WP_028482888.1 |
|             |                                                            | <i>Polymorphum gilvum</i>         | 66% | 98% | 4.00E-64 | WP_013654620.1 |
|             |                                                            | <i>Pannonibacter indicus</i>      | 63% | 97% | 4.00E-59 | WP_055454345.1 |
|             | <i>Methyloferula stellata</i> AR4 <sup>T</sup>             | <i>Pseudovibrio stylochi</i>      | 61% | 98% | 1.00E-58 | WP_068082084.1 |
|             |                                                            | <i>Polymorphum gilvum</i>         | 60% | 97% | 5.00E-57 | WP_013654620.1 |
|             |                                                            | <i>Pannonibacter indicus</i>      | 71% | 97% | 2.00E-67 | WP_055454345.1 |
|             | <i>Methylocella sylvestris</i> BL2 <sup>T</sup>            | <i>Polymorphum gilvum</i>         | 67% | 97% | 8.00E-65 | WP_013654620.1 |
|             |                                                            | <i>Pseudovibrio stylochi</i>      | 65% | 97% | 1.00E-63 | WP_068082084.1 |
|             |                                                            | <i>Pseudovibrio stylochi</i>      | 62% | 99% | 4.00E-59 | WP_068082084.1 |
| <i>flgB</i> | <i>Rhizobium etli</i> CFN42 <sup>T</sup>                   | <i>Inquilinus limosus</i>         | 60% | 97% | 8.00E-57 | WP_026869949.1 |
|             |                                                            | <i>Pannonibacter indicus</i>      | 62% | 97% | 1.00E-56 | WP_055454345.1 |
|             |                                                            | <i>Pannonibacter phragmitetus</i> | 48% | 91% | 2.00E-37 | WP_050474384.1 |
|             | <i>Bradyrhizobium diazoefficiens</i> USDA 110 <sup>T</sup> | <i>Labrenzia</i> sp. VG12         | 47% | 92% | 1.00E-35 | WP_094070900.1 |
|             |                                                            | <i>Polymorphum gilvum</i>         | 47% | 91% | 2.00E-35 | WP_013654621.1 |
|             |                                                            | <i>Pannonibacter phragmitetus</i> | 54% | 91% | 3.00E-41 | WP_050474384.1 |
|             | <i>Rhodopseudomonas palustris</i> BisA53                   | <i>Labrenzia aggregata</i>        | 48% | 92% | 2.00E-38 | WP_006934660.1 |
|             |                                                            | <i>Polymorphum gilvum</i>         | 48% | 91% | 1.00E-37 | WP_013654621.1 |
|             |                                                            | <i>Pseudovibrio hongkongensis</i> | 60% | 99% | 1.00E-44 | WP_068316793.1 |
|             | <i>Pleomorphomonas oryzae</i> DSM 16300 <sup>T</sup>       | <i>Pannonibacter phragmitetus</i> | 52% | 99% | 1.00E-40 | WP_050474384.1 |
|             |                                                            | <i>Polymorphum gilvum</i>         | 50% | 99% | 2.00E-40 | WP_013654621.1 |
|             |                                                            | <i>Labrenzia aggregata</i>        | 57% | 98% | 4.00E-46 | WP_006934660.1 |
|             | <i>Cohaesibacter marisflavi</i> CGMCC 1.9157 <sup>T</sup>  | <i>Pannonibacter indicus</i>      | 56% | 98% | 7.00E-45 | WP_055454346.1 |
|             |                                                            | <i>Polymorphum gilvum</i>         | 54% | 98% | 2.00E-43 | WP_013654621.1 |
|             |                                                            | <i>Polymorphum gilvum</i>         | 53% | 94% | 8.00E-39 | WP_013654621.1 |
|             | <i>Methylobacterium extorquens</i> DM4 <sup>T</sup>        | <i>Pannonibacter phragmitetus</i> | 50% | 94% | 2.00E-36 | WP_050474384.1 |
|             |                                                            | <i>Labrenzia</i> sp. VG12         | 48% | 94% | 4.00E-35 | WP_094070900.1 |

|                                                                  |                                        |     |     |           |                |
|------------------------------------------------------------------|----------------------------------------|-----|-----|-----------|----------------|
| <i>Microvirga massiliensis</i> JC119 <sup>T</sup>                | <i>Pannonibacter phragmitetus</i>      | 62% | 95% | 1.00E-49  | WP_050474384.1 |
|                                                                  | <i>Polymorphum gilvum</i>              | 59% | 95% | 1.00E-48  | WP_013654621.1 |
|                                                                  | <i>Pseudovibrio</i> sp. Tun.PSC04-5.I4 | 60% | 94% | 8.00E-46  | WP_093179797.1 |
|                                                                  | <i>Pannonibacter indicus</i>           | 50% | 98% | 2.00E-31  | WP_055454346.1 |
| <i>Bosea vaviloviae</i> Vaf-18 <sup>T</sup>                      | <i>Polymorphum gilvum</i>              | 46% | 98% | 2.00E-29  | WP_013654621.1 |
|                                                                  | <i>Labrenzia alexandrii</i>            | 46% | 98% | 3.00E-29  | WP_040451983.1 |
|                                                                  | <i>Pannonibacter phragmitetus</i>      | 50% | 94% | 8.00E-39  | WP_050474384.1 |
| <i>Methyloferula stellata</i> AR4 <sup>T</sup>                   | <i>Polymorphum gilvum</i>              | 52% | 94% | 9.00E-39  | WP_013654621.1 |
|                                                                  | <i>Nesiotobacter exalbescens</i>       | 52% | 93% | 3.00E-37  | WP_028482889.1 |
|                                                                  | <i>Polymorphum gilvum</i>              | 50% | 99% | 7.00E-38  | WP_013654621.1 |
| <i>Methylocella sylvestris</i> BL2 <sup>T</sup>                  | <i>Pseudovibrio</i> sp. Tun.PSC04-5.I4 | 51% | 97% | 5.00E-36  | WP_093179797.1 |
|                                                                  | <i>Pannonibacter phragmitetus</i>      | 47% | 99% | 8.00E-35  | WP_050474384.1 |
|                                                                  | <i>Pseudomonas bauzanensis</i>         | 41% | 95% | 2.00E-28  | EZQ16462.1     |
|                                                                  | <i>Polymorphum gilvum</i>              | 40% | 98% | 6.00E-28  | WP_013654621.1 |
| <i>Rhizobium etli</i> CFN42 <sup>T</sup>                         | <i>Nesiotobacter exalbescens</i>       | 42% | 99% | 7.00E-28  | WP_028482889.1 |
| <hr/>                                                            |                                        |     |     |           |                |
| <i>Bradyrhizobium diazoefficiens</i> USDA 110 <sup>T</sup>       | <i>Pannonibacter phragmitetus</i>      | 55% | 98% | 2.00E-127 | WP_019963519.1 |
|                                                                  | <i>Labrenzia</i> sp. OB1               | 56% | 97% | 8.00E-127 | WP_068418034.1 |
|                                                                  | <i>Polymorphum gilvum</i>              | 58% | 97% | 2.00E-119 | WP_013654587.1 |
|                                                                  | <i>Pannonibacter phragmitetus</i>      | 59% | 93% | 3.00E-141 | WP_019963519.1 |
| <i>Rhodopseudomonas palustris</i> BisA53                         | <i>Labrenzia</i> sp. OB1               | 55% | 94% | 1.00E-132 | WP_068418034.1 |
|                                                                  | <i>Brevundimonas diminuta</i>          | 56% | 93% | 4.00E-128 | OYX21155.1     |
|                                                                  | <i>Pannonibacter phragmitetus</i>      | 58% | 96% | 4.00E-151 | WP_050474412.1 |
| <i>flhB</i> <i>Pleomorphomonas oryzae</i> DSM 16300 <sup>T</sup> | <i>Labrenzia</i> sp. OB1               | 55% | 96% | 6.00E-137 | WP_068418034.1 |
|                                                                  | <i>Polymorphum gilvum</i>              | 57% | 95% | 6.00E-133 | WP_013654587.1 |
|                                                                  | <i>Pannonibacter phragmitetus</i>      | 56% | 98% | 2.00E-134 | WP_050474412.1 |
|                                                                  | <i>Labrenzia</i> sp. OB1               | 57% | 96% | 1.00E-133 | WP_068418034.1 |
| <i>Cohaesibacter marisflavi</i> CGMCC 1.9157 <sup>T</sup>        | <i>Polymorphum gilvum</i>              | 57% | 96% | 2.00E-122 | WP_013654587.1 |
|                                                                  | <i>Brevundimonas diminuta</i>          | 55% | 98% | 3.00E-115 | OYX21155.1     |
|                                                                  | <i>Labrenzia alexandrii</i>            | 53% | 98% | 1.00E-111 | WP_055670191.1 |

|                                                            |                                                      |     |     |           |                |
|------------------------------------------------------------|------------------------------------------------------|-----|-----|-----------|----------------|
|                                                            | <i>Nesiotobacter exalbescens</i>                     | 54% | 99% | 3.00E-109 | WP_028482890.1 |
| <i>Microvirga massiliensis</i> JC119 <sup>T</sup>          | <i>Brevundimonas diminuta</i>                        | 60% | 99% | 5.00E-142 | OYX21155.1     |
|                                                            | <i>Pannonibacter phragmitetus</i>                    | 57% | 98% | 4.00E-141 | WP_050474412.1 |
|                                                            | <i>Labrenzia marina</i>                              | 55% | 98% | 1.00E-133 | WP_103223513.1 |
|                                                            | <i>Pannonibacter phragmitetus</i>                    | 55% | 98% | 7.00E-119 | WP_019963519.1 |
| <i>Bosea vaviloviae</i> Vaf-18 <sup>T</sup>                | <i>Labrenzia aggregata</i>                           | 51% | 99% | 1.00E-116 | WP_055654437.1 |
|                                                            | <i>Polymorphum gilvum</i>                            | 55% | 99% | 1.00E-108 | WP_013654587.1 |
|                                                            | <i>Labrenzia</i> sp. OB1                             | 52% | 99% | 1.00E-112 | WP_068418034.1 |
|                                                            | <i>Pannonibacter indicus</i>                         | 55% | 99% | 8.00E-112 | WP_055457260.1 |
| <i>Methyloferula stellata</i> AR4 <sup>T</sup>             | <i>Polymorphum gilvum</i>                            | 53% | 99% | 5.00E-105 | WP_013654587.1 |
|                                                            | <i>Pannonibacter phragmitetus</i>                    | 51% | 91% | 7.00E-111 | WP_019963519.1 |
|                                                            | <i>Labrenzia</i> sp. VG12                            | 54% | 91% | 6.00E-110 | WP_094070869.1 |
|                                                            | <i>Brevundimonas diminuta</i>                        | 51% | 91% | 2.00E-106 | OYX21155.1     |
| <i>Methylocella sylvestris</i> BL2 <sup>T</sup>            | <i>Pannonibacter indicus</i>                         | 49% | 97% | 2.00E-88  | WP_055457260.1 |
|                                                            | <i>Rhizobium etli</i> CFN42 <sup>T</sup>             | 50% | 98% | 5.00E-86  | EZQ16471.1     |
|                                                            | <i>Brevundimonas diminuta</i>                        | 45% | 98% | 4.00E-82  | OYX21155.1     |
|                                                            | <i>Pannonibacter phragmitetus</i>                    | 60% | 95% | 3.00E-125 | WP_050474413.1 |
| <i>Bradyrhizobium diazoefficiens</i> USDA 110 <sup>T</sup> | <i>Polymorphum gilvum</i>                            | 59% | 95% | 6.00E-123 | WP_013654586.1 |
|                                                            | <i>Labrenzia marina</i>                              | 55% | 94% | 1.00E-111 | WP_103223512.1 |
|                                                            | <i>Pannonibacter phragmitetus</i>                    | 60% | 95% | 1.00E-146 | WP_050474413.1 |
|                                                            | <i>Rhodopseudomonas palustris</i> BisA53             | 60% | 95% | 7.00E-146 | WP_013654586.1 |
| <i>fliG</i>                                                | <i>Labrenzia</i> sp. VG12                            | 56% | 95% | 6.00E-136 | WP_094070868.1 |
|                                                            | <i>Pannonibacter phragmitetus</i>                    | 60% | 99% | 6.00E-144 | WP_019963518.1 |
|                                                            | <i>Pleomorphomonas oryzae</i> DSM 16300 <sup>T</sup> | 61% | 95% | 2.00E-142 | WP_013654586.1 |
|                                                            | <i>Labrenzia marina</i>                              | 59% | 95% | 2.00E-136 | WP_103223512.1 |
| <i>Cohaesibacter marisflavi</i> CGMCC 1.9157 <sup>T</sup>  | <i>Pannonibacter indicus</i>                         | 65% | 94% | 1.00E-160 | WP_055457261.1 |
|                                                            | <i>Polymorphum gilvum</i>                            | 63% | 97% | 1.00E-157 | WP_013654586.1 |
|                                                            | <i>Labrenzia</i> sp. OB1                             | 62% | 96% | 3.00E-155 | WP_068418037.1 |
|                                                            | <i>Methylobacterium extorquens</i> DM4 <sup>T</sup>  | 61% | 91% | 4.00E-148 | WP_013654586.1 |

|                                                   |                                   |     |     |           |                |
|---------------------------------------------------|-----------------------------------|-----|-----|-----------|----------------|
| <i>Microvirga massiliensis</i> JC119 <sup>T</sup> | <i>Pannonibacter phragmitetus</i> | 58% | 92% | 2.00E-142 | WP_050474413.1 |
|                                                   | <i>Labrenzia alexandrii</i>       | 57% | 91% | 1.00E-137 | WP_050775945.1 |
|                                                   | <i>Pannonibacter phragmitetus</i> | 57% | 97% | 4.00E-138 | WP_050474413.1 |
|                                                   | <i>Polymorphum gilvum</i>         | 58% | 97% | 2.00E-136 | WP_013654586.1 |
|                                                   | <i>Labrenzia</i> sp. VG12         | 56% | 96% | 3.00E-134 | WP_094070868.1 |
| <i>Bosea vaviloviae</i> Vaf-18 <sup>T</sup>       | <i>Polymorphum gilvum</i>         | 56% | 96% | 5.00E-124 | WP_013654586.1 |
|                                                   | <i>Pannonibacter phragmitetus</i> | 54% | 92% | 2.00E-121 | WP_050474413.1 |
|                                                   | <i>Labrenzia</i> sp. OB1          | 53% | 92% | 1.00E-117 | WP_068418037.1 |
| <i>Methyloferula stellata</i> AR4 <sup>T</sup>    | <i>Pannonibacter indicus</i>      | 53% | 98% | 2.00E-118 | WP_055457261.1 |
|                                                   | <i>Polymorphum gilvum</i>         | 54% | 98% | 5.00E-117 | WP_013654586.1 |
|                                                   | <i>Labrenzia</i> sp. VG12         | 54% | 94% | 2.00E-114 | WP_094070868.1 |
| <i>Methylocella sylvestris</i> BL2 <sup>T</sup>   | <i>Pannonibacter phragmitetus</i> | 55% | 94% | 2.00E-109 | WP_050474413.1 |
|                                                   | <i>Polymorphum gilvum</i>         | 55% | 95% | 1.00E-107 | WP_013654586.1 |
|                                                   | <i>Labrenzia aggregata</i>        | 53% | 98% | 8.00E-107 | WP_006934600.1 |
| <i>Rhizobium etli</i> CFN42 <sup>T</sup>          | <i>Pseudomonas bauzanensis</i>    | 42% | 92% | 1.00E-78  | EZQ16470.1     |
|                                                   | <i>Pseudovibrio axinellae</i>     | 32% | 92% | 9.00E-49  | WP_068010189.1 |
|                                                   | <i>Ahrensia marina</i>            | 33% | 93% | 1.00E-46  | WP_082376687.1 |

---
