# Supplementary material for: Phylogenomic Analyses of Bradyrhizobium Reveal Uneven Distribution of the Lateral and Subpolar Flagellar Systems, Which Extends to Rhizobiales
Source: MDPI journal article supplement (doi:10.3390/microorganisms7020050), 2019-02-13
Supplement: s1 [file s1]

**Supplementary Data S3.** Subpolar and lateral flagellar systems distribution in sequenced representative *Rhizobiales* order species

| Family            | Genus         | Species/Genome <sup>a</sup>                         | No. of sequenced genomes <sup>b</sup> | Subpolar flagellum | Lateral flagellum | Subpolar flagellum ascc. No | Lateral flagellum ascc. No. | Reference                                   |
|-------------------|---------------|-----------------------------------------------------|---------------------------------------|--------------------|-------------------|-----------------------------|-----------------------------|---------------------------------------------|
| Aurantimonadaceae | Aurantimonas  | <i>A. corallicida</i> DSM 14790 <sup>T</sup>        | 2                                     | -                  | +                 |                             | BBWN01000012.1              |                                             |
|                   |               | <i>A. endophytica</i> KCTC 52296 <sup>T</sup>       | 0                                     |                    |                   |                             |                             |                                             |
|                   |               | <i>A. litoralis</i> KCTC 12094 <sup>T</sup>         | 0                                     |                    |                   |                             |                             |                                             |
|                   |               | <i>A. manganoxydans</i> DSM 21871 <sup>T</sup>      | 2                                     | -                  | +                 |                             | CH672387.1                  |                                             |
|                   | Aureimonas    | <i>A. altamirensis</i> DSM 21988 <sup>T</sup>       | 3                                     |                    | n.m/n.d.          |                             |                             | Jurado et al., 2006 (10.1099/ijs.0.64397-0) |
|                   |               | <i>A. endophytica</i> KCTC 52217 <sup>T</sup>       | 0                                     |                    |                   |                             |                             |                                             |
|                   |               | <i>A. ferruginea</i> JCM 18444 <sup>T</sup>         | 0                                     |                    |                   |                             |                             |                                             |
|                   |               | <i>A. frigidaquae</i> JCM 14755 <sup>T</sup>        | 1                                     |                    | n.d.              |                             |                             |                                             |
|                   |               | <i>A. glaciei</i> KCTC 52359 <sup>T</sup>           | 0                                     |                    |                   |                             |                             |                                             |
|                   |               | <i>A. glaciistagni</i> JCM 30183 <sup>T</sup>       | 0                                     |                    |                   |                             |                             |                                             |
|                   |               | <i>A. rubiginis</i> JCM 18445 <sup>T</sup>          | 0                                     |                    |                   |                             |                             |                                             |
|                   |               | <i>A. ureilytica</i> DSM 18598 <sup>T</sup>         | 4                                     | -                  | +                 |                             | ARQE01000005.1              |                                             |
|                   |               | <i>A. jatrophae</i> DSM 25025 <sup>T</sup>          | 1                                     | -                  | +                 |                             | FNIT01000006.1              |                                             |
|                   |               | <i>A. phyllosphaerae</i> DSM 25026 <sup>T</sup>     | 1                                     | -                  | +                 |                             | FOOA01000003.1              |                                             |
|                   | Fulvimarina   | <i>F. manganoxydans</i> CGMCC 1.10972 <sup>T</sup>  | 1                                     | -                  | +                 |                             | FWXR01000006.1              |                                             |
|                   |               | <i>F. pelagi</i> DSM 15513 <sup>T</sup>             | 2                                     | -                  | +                 |                             | BBWO01000012.1              |                                             |
|                   | <i>Jiella</i> | <i>J. aquimaris</i> JCM 30119 <sup>T</sup>          | 0                                     |                    |                   |                             |                             |                                             |
|                   | Martellella   | <i>M. endophytica</i> YC6887 <sup>T</sup>           | 1                                     |                    | n.m/n.d.          |                             |                             | Bibi et al., 2013 (10.1099/ijs.0.048785-0)  |
|                   |               | <i>M. mangrovi</i> DSM 28102 <sup>T</sup>           | 0                                     |                    |                   |                             |                             |                                             |
|                   |               | <i>M. mediterranea</i> DSM 17316 <sup>T</sup>       | 2                                     |                    | n.m/n.d.          |                             |                             | Rivas et al., 2005 (10.1099/ijs.0.63438-0)  |
|                   |               | <i>M. radialis</i> DSM 28101 <sup>T</sup>           | 0                                     |                    |                   |                             |                             |                                             |
| Bartonellaceae    | Bartonella    | <i>B. acomydis</i> KCTC 23907 <sup>T</sup>          | 0                                     |                    |                   |                             |                             |                                             |
|                   |               | <i>B. alsatica</i> IBS 382 <sup>T</sup>             | 1                                     |                    | n.d.              |                             |                             |                                             |
|                   |               | <i>B. ancashensis</i> 20.00 <sup>T</sup>            | 1                                     | -                  | +                 |                             | CP010401.1                  |                                             |
|                   |               | <i>B. apis</i> PEB0122 <sup>T</sup>                 | 6                                     | -                  | +                 |                             | LXYU01000002.1              |                                             |
|                   |               | <i>B. australis</i> Aust/NH1 <sup>T</sup>           | 1                                     |                    | n.d.              |                             |                             |                                             |
|                   |               | <i>B. bacilliformis</i> ATCC 35685 <sup>T</sup>     | 16                                    | -                  | +                 |                             | CP000524.1                  |                                             |
|                   |               | <i>B. birtlesii</i> IBS 325 <sup>T</sup>            | 6                                     |                    | n.d.              |                             |                             |                                             |
|                   |               | <i>B. bovis</i> 91-4 <sup>T</sup>                   | 2                                     | -                  | +                 |                             | CM001844.1                  |                                             |
|                   |               | <i>B. callosciuri</i> KCTC 23909 <sup>T</sup>       | 0                                     |                    |                   |                             |                             |                                             |
|                   |               | <i>B. capreoli</i> DSM 21569 <sup>T</sup>           | 0                                     |                    |                   |                             |                             |                                             |
|                   |               | <i>B. chomelii</i> DSM 21431 <sup>T</sup>           | 0                                     |                    |                   |                             |                             |                                             |
|                   |               | <i>B. clarridgeiae</i> ATCC 51734 <sup>T</sup>      | 2                                     | -                  | +                 |                             | KI912398.1                  |                                             |
|                   |               | <i>B. coopersplainsensis</i> DSM 23499 <sup>T</sup> | 0                                     |                    |                   |                             |                             |                                             |
|                   |               | <i>B. doshae</i> ATCC 700133 <sup>T</sup>           | 3                                     |                    | n.d.              |                             |                             |                                             |
|                   |               | <i>B. durdenii</i>                                  | 0                                     |                    |                   |                             |                             |                                             |
|                   |               | <i>B. elizabethae</i> ATCC 49927 <sup>T</sup>       | 4                                     |                    | n.d.              |                             |                             |                                             |
|                   |               | <i>B. florencae</i> R4 <sup>T</sup>                 | 1                                     |                    | n.d.              |                             |                             |                                             |
|                   |               | <i>B. fuyuanensis</i> DSM 100694 <sup>T</sup>       | 0                                     |                    |                   |                             |                             |                                             |
|                   |               | <i>B. grahamii</i> ATCC 700132 <sup>T</sup>         | 2                                     |                    | n.d.              |                             |                             |                                             |
|                   |               | <i>B. heixiaziensis</i> DSM 100695 <sup>T</sup>     | 0                                     |                    |                   |                             |                             |                                             |
|                   |               | <i>B. henselae</i> Houston-1 <sup>T</sup>           | 23                                    |                    | n.d.              |                             |                             |                                             |
|                   |               | <i>B. jaculi</i> KCTC 23655 <sup>T</sup>            | 0                                     |                    |                   |                             |                             |                                             |
|                   |               | <i>B. japonica</i> DSM 23650 <sup>T</sup>           | 0                                     |                    |                   |                             |                             |                                             |
|                   |               | <i>B. koehlerae</i> C-29 <sup>T</sup>               | 1                                     |                    | n.d.              |                             |                             |                                             |
|                   |               | <i>B. massiliensis</i>                              | 0                                     |                    |                   |                             |                             |                                             |
|                   |               | <i>B. melophagi</i> K-2C                            | 1                                     | -                  | +                 |                             | JH725084.1                  |                                             |
|                   |               | <i>B. pachyuromydis</i>                             | 0                                     |                    |                   |                             |                             |                                             |

|                          |                            |                                                  |    |   |           |                |                                                      |
|--------------------------|----------------------------|--------------------------------------------------|----|---|-----------|----------------|------------------------------------------------------|
|                          |                            | <i>B. peromysci</i> KCTC 23657 <sup>T</sup>      | 0  |   |           |                |                                                      |
|                          |                            | <i>B. phoceensis</i> CIP 107707 <sup>T</sup>     | 0  |   |           |                |                                                      |
|                          |                            | <i>B. queenslandensis</i> Aust/NH15              | 1  |   | n.m./n.d. |                | Gundi et al., 2009 (10.1099/ijms.0.002865-0)         |
|                          |                            | <i>B. quintana</i> RM-11                         | 14 |   | n.d.      |                |                                                      |
|                          |                            | <i>B. rattaaustraliani</i> Aust/NH4 <sup>T</sup> | 1  |   | n.m./n.d. |                | Gundi et al., 2009 (10.1099/ijms.0.002865-0)         |
|                          |                            | <i>B. rattimassiliensis</i> 15908                | 2  |   | n.m./n.d. |                | Gundi et al., 2004 (10.1128/JCM.42.8.3816-3818.2004) |
|                          |                            | <i>B. rochalimae</i> ATCC BAA-1498 <sup>T</sup>  | 1  | - | +         | FN645457.1     |                                                      |
|                          |                            | <i>B. schoenbuchensis</i> R1 <sup>T</sup>        | 2  | - | +         | CP019789.1     |                                                      |
|                          |                            | <i>B. senegalensis</i> OS02 <sup>T</sup>         | 1  |   | n.m./n.d. |                | Mediannikov et al., 2013 (10.4056/sigs.3807472)      |
|                          |                            | <i>B. silvatica</i> DSM 23649 <sup>T</sup>       | 0  |   |           |                |                                                      |
|                          |                            | <i>B. silvicola</i>                              | 0  |   |           |                |                                                      |
|                          |                            | <i>B. talpae</i>                                 | 0  |   |           |                |                                                      |
|                          |                            | <i>B. tamiae</i> Th307                           | 2  |   | n.d.      |                |                                                      |
|                          |                            | <i>B. taylorii</i> 8TBB                          | 2  |   | n.d.      |                |                                                      |
|                          |                            | <i>B. tribocorum</i> CIP 105476 <sup>T</sup>     | 2  |   | n.d.      |                |                                                      |
|                          |                            | <i>B. vinsonii</i> Winnie                        | 5  |   | n.d.      |                |                                                      |
|                          |                            | <i>B. volans</i>                                 | 0  |   |           |                |                                                      |
|                          |                            | <i>B. washoensis</i> Sb944nv                     | 2  |   | n.d.      |                |                                                      |
|                          |                            | <i>B. weisii</i>                                 | 0  |   |           |                |                                                      |
| <i>Beijerinckiaceae</i>  | <i>Beijerinckia</i>        | <i>B. derxii</i> DSM 2328 <sup>T</sup>           | 0  |   |           |                |                                                      |
|                          |                            | <i>B. doebereineriae</i> LMG 2819 <sup>T</sup>   | 0  |   |           |                |                                                      |
|                          |                            | <i>B. fluminensis</i> CIP 106281 <sup>T</sup>    | 0  |   |           |                |                                                      |
|                          |                            | <i>B. indica</i> ATCC 9039 <sup>T</sup>          | 1  | - | +         | CP001016.1     |                                                      |
|                          |                            | <i>B. mobilis</i> UQM 1969 <sup>T</sup>          | 1  | - | +         | JQJH01000002.1 |                                                      |
|                          | <i>Camelimonas</i>         | <i>C. abortus</i> DSM 24741 <sup>T</sup>         | 0  |   |           |                |                                                      |
|                          |                            | <i>C. fluminis</i> KCTC 42282 <sup>T</sup>       | 0  |   |           |                |                                                      |
|                          |                            | <i>C. lactis</i> CCUG 58638 <sup>T</sup>         | 0  |   |           |                |                                                      |
|                          |                            |                                                  |    |   |           |                |                                                      |
|                          | <i>Chelatococcus</i>       | <i>C. csaccharovorans</i> DSM 6462 <sup>T</sup>  | 0  |   |           |                |                                                      |
|                          |                            | <i>C. caeni</i> KCTC 32487 <sup>T</sup>          | 0  |   |           |                |                                                      |
|                          |                            | <i>C. daeguensis</i> TAD1                        | 2  | - | +         | CP018095.1     |                                                      |
|                          |                            | <i>C. reniformis</i> JCM 30308 <sup>T</sup>      | 0  |   |           |                |                                                      |
|                          |                            | <i>C. sambhunathii</i> DSM 18167 <sup>T</sup>    | 2  | - | +         | LIOL01000001.1 |                                                      |
|                          | <i>Methylocapsa</i>        | <i>M. acidiphila</i> B2 <sup>T</sup>             | 1  |   | n.m./n.d. |                | Dedysch et al., 2002 (10.1099/00207713-52-1-251)     |
|                          |                            | <i>M. aurea</i> KYG <sup>T</sup>                 | 1  | - | +         | JQKO01000014.1 |                                                      |
|                          |                            | <i>M. palsarum</i> NE2 <sup>T</sup>              | 1  | - | +         | FOSN01000001.1 |                                                      |
|                          | <i>Methylocella</i>        | <i>M. palustris</i> ATCC 700799 <sup>T</sup>     | 0  |   |           |                |                                                      |
|                          |                            | <i>M. silvestris</i> BL2 <sup>T</sup>            | 1  | - | +         | NC_011666.1    |                                                      |
|                          |                            | <i>M. tundrae</i> DSM 15673 <sup>T</sup>         | 0  |   |           |                |                                                      |
|                          | <i>Methyloferula</i>       | <i>M. stellata</i> AR4 <sup>T</sup>              | 1  | - | +         | ARWA01000001.1 |                                                      |
|                          | <i>Methyloporosula</i>     | <i>M. polaris</i> DSM 22001 <sup>T</sup>         | 0  |   |           |                |                                                      |
|                          | <i>Methylovirgula</i>      | <i>M. ligni</i> DSM 19998 <sup>T</sup>           | 0  |   |           |                |                                                      |
|                          | <i>Pseudochelatococcus</i> | <i>P. contaminans</i> LMG 28285 <sup>T</sup>     | 0  |   |           |                |                                                      |
|                          |                            | <i>P. lubricantis</i> LMG 28286 <sup>T</sup>     | 0  |   |           |                |                                                      |
| <i>Bradyrhizobiaceae</i> | <i>Afipia</i>              | <i>A. birgiae</i> 34632 <sup>T</sup>             | 1  | + | -         | HG326654.1     |                                                      |
|                          |                            | <i>A. broomeae</i> ATCC 49717 <sup>T</sup>       | 1  | + | -         | AGWX01000004.1 |                                                      |
|                          |                            | <i>A. clevelandensis</i> ATCC 49720 <sup>T</sup> | 1  | + | -         | AGWY01000007.1 |                                                      |
|                          |                            | <i>A. felis</i> ATCC 53690 <sup>T</sup>          | 2  | + | -         | AGWZ01000001.1 |                                                      |
|                          |                            | <i>A. lausannensis</i>                           | 0  |   |           |                |                                                      |
|                          |                            | <i>A. massiliensis</i> LC387 <sup>T</sup>        | 1  | + | -         | LBIA01000001.1 |                                                      |
|                          |                            |                                                  |    |   |           |                |                                                      |
|                          | <i>Blastobacter</i>        | <i>B. henricii</i>                               | 0  |   |           |                |                                                      |
|                          | <i>Bossea</i>              | <i>B. eneae</i> CIP 106338 <sup>T</sup>          | 0  |   |           |                |                                                      |
|                          |                            | <i>B. lathyri</i> LMG 26379 <sup>T</sup>         | 0  |   |           |                |                                                      |
|                          |                            | <i>B. lupini</i> LMG 26383 <sup>T</sup>          | 1  | + | -         | FOAN01000010.1 |                                                      |
|                          |                            | <i>B. massiliensis</i> CIP 106336 <sup>T</sup>   | 0  |   |           |                |                                                      |
|                          |                            |                                                  |    |   |           |                |                                                      |

|                  |                                                    |    |   |   |                |                   |
|------------------|----------------------------------------------------|----|---|---|----------------|-------------------|
|                  | <i>B. manatitlanensis</i> ATCC 700918 <sup>T</sup> | 0  |   |   |                |                   |
|                  | <i>B. robiniae</i> DSM 26672 <sup>T</sup>          | 1  | + | - | FNBZ01000002.1 |                   |
|                  | <i>B. thiooxidans</i> DSM 9653 <sup>T</sup>        | 2  | + | - | FUYX01000001.1 |                   |
|                  | <i>B. vaviloviae</i> Vaf-18 <sup>T</sup>           | 2  | + | + | CP017147.1     | CP017147.1        |
|                  | <i>B. vestrisii</i> CIP 106340 <sup>T</sup>        | 0  |   |   |                |                   |
| Bradyrhizobium   | <i>B. americanum</i> LMG 29514 <sup>T</sup>        | 0  |   |   |                |                   |
|                  | <i>B. arachidis</i> LMG 26795 <sup>T</sup>         | 1  | + | + | FPBQ01000003.1 | FPBQ01000002.1    |
|                  | <i>B. betae</i> IMG 21987 <sup>T</sup>             | 0  |   |   |                |                   |
|                  | <i>B. canariense</i> GAS369                        | 15 | + | - | LT629750.1     |                   |
|                  | <i>B. centrosemantis</i> LMG 29515 <sup>T</sup>    | 0  |   |   |                |                   |
|                  | <i>B. cytisi</i> LMG 25866 <sup>T</sup>            | 0  |   |   |                |                   |
|                  | <i>B. daqingense</i> CGMCC 1.10947 <sup>Tc</sup>   | 1  | + | + |                |                   |
|                  | <i>B. denitrificans</i> ATCC 43295 <sup>T</sup>    | 0  |   |   |                |                   |
|                  | <i>B. diazoefficiens</i> USDA 110 <sup>T</sup>     | 5  | + | + | BA000040.2     | BA000040.2        |
|                  | <i>B. elkanii</i> USDA 76 <sup>T</sup>             | 13 | + | - | KB900701.1     |                   |
|                  | <i>B. embrapense</i> SEMIA 6208 <sup>T</sup>       | 1  | + | - | LFIP02000003.1 |                   |
|                  | <i>B. erythrophlei</i> MT12                        | 5  | + | - | FNTH01000001.1 |                   |
|                  | <i>B. ferriligni</i> CCBAU 51502 <sup>T</sup>      | 0  |   |   |                |                   |
|                  | <i>B. ganzhouense</i> CCAU 101088 <sup>T</sup>     | 0  |   |   |                |                   |
|                  | <i>B. guangdongense</i> LMG 28620 <sup>T</sup>     | 0  |   |   |                |                   |
|                  | <i>B. guangxiense</i> LMG 28621 <sup>T</sup>       | 0  |   |   |                |                   |
|                  | <i>B. icense</i> LMTR 13 <sup>T</sup>              | 1  | + | - | CP016428       |                   |
|                  | <i>B. ingae</i> HAMBI 3600 <sup>T</sup>            | 0  |   |   |                |                   |
|                  | <i>B. iriomotense</i> LMG 24129 <sup>T</sup>       | 0  |   |   |                |                   |
|                  | <i>B. japonicum</i> USDA 6 <sup>T</sup>            | 23 | + | + | AP012206.1     | AP012206.1        |
|                  | <i>B. jicamae</i> PAC68 <sup>T</sup>               | 1  | + | - | LLXZ01000016.1 |                   |
|                  | <i>B. kavangense</i> DSM 100299 <sup>T</sup>       | 0  |   |   |                |                   |
|                  | <i>B. lablabi</i> CCBAU 23086 <sup>T</sup>         | 4  | + | - | LLYB01000082.1 |                   |
|                  | <i>B. liaoningense</i> CCNWSX0360                  | 3  | + | + | LUKO01000219.1 | LUKO01000044.1    |
|                  | <i>B. manausense</i> BR3351 <sup>T</sup>           | 1  | + | + | LJYG01000054.1 | LJYG01000026.1    |
|                  | <i>B. mercantei</i> SEMIA 6399 <sup>T</sup>        | 1  | + | - | MKFI01000001.1 |                   |
|                  | <i>B. neotropicale</i> BR 10247 <sup>T</sup>       | 1  | + | + | LSEF01000057.1 | LSEF01000114.1    |
|                  | <i>B. oligotrophicum</i> S58 <sup>T</sup>          | 1  | + | - | NC_020453.1    |                   |
|                  | <i>B. ottawaense</i> GAS524                        | 2  | + | - | LT629693.1     |                   |
|                  | <i>B. pachyrhizi</i> PAC48 <sup>T</sup>            | 2  | + | - | LFIQ01000120.1 |                   |
|                  | <i>B. paxllaeri</i> LMTR 21 <sup>T</sup>           | 1  | + | - | MAXB01000079.1 |                   |
|                  | <i>B. retamae</i> Ro19 <sup>T</sup>                | 1  | + | - | LLYA01000191.1 |                   |
|                  | <i>B. rifense</i> LMG 26781 <sup>T</sup>           | 0  |   |   |                |                   |
|                  | <i>B. stylosanthis</i> BR 446 <sup>T</sup>         | 1  | + | - | LVEM01000001.1 |                   |
|                  | <i>B. subterraneum</i> DSM 100298 <sup>T</sup>     | 0  |   |   |                |                   |
|                  | <i>B. tropiciagri</i> SEMIA 6148 <sup>T</sup>      | 1  | + | - | LFIP02000003.1 |                   |
|                  | <i>B. valentinum</i> LmjM3 <sup>T</sup>            | 2  | + | - | LLXX01000235.1 |                   |
|                  | <i>B. vignae</i> DSM 100297 <sup>T</sup>           | 0  |   |   |                |                   |
|                  | <i>B. viridifuturi</i> SEMIA 690 <sup>T</sup>      | 1  | + | - | LGTB01000070.1 |                   |
|                  | <i>B. yuanmingense</i> CCBAU 10071 <sup>T</sup>    | 5  | + | + | FMAE01000011.1 | FMAE01000001.1    |
| Nitrobacter      | <i>N. alkalicus</i> LMD 97.163 <sup>T</sup>        | 0  |   |   |                |                   |
|                  | <i>N. hamburgensis</i> X14 <sup>T</sup>            | 1  | + | - | NC_007964      |                   |
|                  | <i>N. vulgaris</i> Ab1                             | 1  | + | - | MWPQ01000026.1 |                   |
|                  | <i>N. winogradskyi</i> Nb-255 <sup>T</sup>         | 1  | + | - | NC_007406      |                   |
| Oligotroph       | <i>O. carboxidovorans</i> ATCC 49405 <sup>T</sup>  | 3  | + | - | CP001196.1     |                   |
| Photorhizobium   | <i>P. thompsonianum</i>                            | 0  |   |   |                |                   |
| Rhodoblastus     | <i>R. acidophilus</i> DSM 137 <sup>T</sup>         | 1  | - | + |                | NZ_FYDG01000006.1 |
|                  | <i>R. sphagnicola</i> DSM 16996 <sup>T</sup>       | 0  |   |   |                |                   |
| Rhodopseudomonas | <i>R. boonkerdii</i> NBRC 106595 <sup>T</sup>      | 0  |   |   |                |                   |

|                         |                                                      |           |   |           |                       |                                              |
|-------------------------|------------------------------------------------------|-----------|---|-----------|-----------------------|----------------------------------------------|
|                         | <i>R. faecalis</i> JCM 11668 <sup>T</sup>            | 0         |   |           |                       |                                              |
|                         | <i>R. harwoodiae</i> NBRC 107575 <sup>T</sup>        | 0         |   |           |                       |                                              |
|                         | <i>R. julia</i> DSM 11549 <sup>T</sup>               | 0         |   |           |                       |                                              |
|                         | <i>R. lichen</i>                                     | 0         |   |           |                       |                                              |
|                         | <i>R. oryzae</i>                                     | 0         |   |           |                       |                                              |
|                         | <b><i>R. palustris</i> BisA53</b>                    | <b>11</b> | + | +         | <b>CP000463.1</b>     | <b>CP000463.1</b>                            |
|                         | <i>R. parapalustris</i> NBRC 106083 <sup>T</sup>     | 0         |   |           |                       |                                              |
|                         | <i>R. pentothentaxigens</i> NBRC 108862 <sup>T</sup> | 0         |   |           |                       |                                              |
|                         | <i>R. pseudopalustris</i> DSM 123 <sup>T</sup>       | 1         | + | -         | FODT01000007.1        |                                              |
|                         | <i>R. rhénobacensis</i> DSM 12706 <sup>T</sup>       | 0         |   |           |                       |                                              |
|                         | <i>R. telluris</i> NBRC 107609 <sup>T</sup>          | 0         |   |           |                       |                                              |
|                         | <i>R. thermotolerans</i> NBRC 108863 <sup>T</sup>    | 0         |   |           |                       |                                              |
| <i>Salinarimonas</i>    | <i>S. ramus</i> DSM 22962 <sup>T</sup>               | 0         |   |           |                       |                                              |
|                         | <b><i>S. rosea</i> DSM 21201<sup>T</sup></b>         | <b>1</b>  | + | +         | <b>AUBC01000001.1</b> | <b>AUBC01000006.1</b>                        |
| <i>Tardiphaga</i>       | <b><i>T. robiniae</i> Vaf-07</b>                     | <b>1</b>  | + | +         | <b>LVYV01000034.1</b> | <b>LVYV01000001.1</b>                        |
| <i>Variibacter</i>      | <i>V. gotjawalensis</i> LMG 28093 <sup>T</sup>       | 0         |   |           |                       |                                              |
| <i>Brucellaceae</i>     | <i>Brucella</i>                                      |           |   |           |                       |                                              |
|                         | <i>B. abortus</i> 544 <sup>T</sup>                   | 197       | - | +         |                       | AQIS01000009.1                               |
|                         | <i>B. canis</i> RM6/66 <sup>T</sup>                  | 20        | - | +         |                       | CP007759.1                                   |
|                         | <i>B. ceti</i> TE28753-12                            | 9         | - | +         |                       | CP006899.1                                   |
|                         | <i>B. inopinata</i> BO1 <sup>T</sup>                 | 2         | - | +         |                       | ADEZ01000028.1                               |
|                         | <i>B. melitensis</i> 16M <sup>T</sup>                | 155       | - | +         |                       | AE008918.1                                   |
|                         | <i>B. microti</i> CCM 4915 <sup>T</sup>              | 1         | - | +         |                       | CP001579.1                                   |
|                         | <i>B. neotomae</i> 5K33 <sup>T</sup>                 | 3         | - | +         |                       | JMSC01000004.1                               |
|                         | <i>B. ovis</i> ATCC 25840 <sup>T</sup>               | 16        | - | +         |                       | CP000709.1                                   |
|                         | <i>B. papionis</i> NCTC 13660 <sup>T</sup>           | 0         |   |           |                       |                                              |
|                         | <i>B. pinnipedialis</i> B2/94                        | 5         | - | +         |                       | CP002079.1                                   |
|                         | <i>B. suis</i> 1330 <sup>T</sup>                     | 58        | - | +         |                       | AE014292.2                                   |
|                         | <i>B. vulpis</i> F60 <sup>T</sup>                    | 2         | - | +         |                       | LN997864.1                                   |
|                         | <i>Daeguia</i>                                       |           |   |           |                       |                                              |
|                         | <i>D. caeni</i> KCTC 12981 <sup>T</sup>              | 0         |   |           |                       |                                              |
|                         | <i>Falsochrobactrum</i>                              |           |   |           |                       |                                              |
|                         | <i>F. ovis</i> LMG 27356 <sup>T</sup>                | 0         |   |           |                       |                                              |
|                         | <i>Mycoplana</i>                                     |           |   |           |                       |                                              |
|                         | <i>M. dimorpha</i> ATCC 4279 <sup>T</sup>            | 0         |   |           |                       |                                              |
|                         | <i>M. peli</i>                                       | 0         |   |           |                       |                                              |
|                         | <i>M. ramosa</i> ATCC 49678 <sup>T</sup>             | 0         |   |           |                       |                                              |
| <i>Ochrobactrum</i>     | <i>O. anthropi</i> ATCC 49188 <sup>T</sup>           | 15        | - | +         |                       | CP000759.1                                   |
|                         | <i>O. ciceri</i> DSM 22292 <sup>T</sup>              | 0         |   |           |                       |                                              |
|                         | <i>O. cytisi</i> IPA7.2                              | 1         | - | +         |                       | MOEC01000003.1                               |
|                         | <i>O. daejeonense</i> KCTC 22458 <sup>T</sup>        | 0         |   |           |                       |                                              |
|                         | <i>O. endophyticum</i> DSM 29930 <sup>T</sup>        | 0         |   |           |                       |                                              |
|                         | <i>O. gallinifaecis</i> DSM 15295 <sup>T</sup>       | 0         |   |           |                       |                                              |
|                         | <i>O. grignonense</i> OgA9a <sup>T</sup>             | 1         | - | +         |                       | NNRL01000162.1                               |
|                         | <i>O. guangzhouense</i>                              | 0         |   |           |                       |                                              |
|                         | <i>O. haematophilum</i> CIP 109452 <sup>T</sup>      | 0         |   |           |                       |                                              |
|                         | <i>O. intermedium</i> LMG 3301 <sup>T</sup>          | 8         | - | +         |                       | ACQA01000002.1                               |
|                         | <i>O. lupini</i> LUP21 <sup>T</sup>                  | 1         | - | +         |                       | NNRN01000065.1                               |
|                         | <i>O. oryzae</i> DSM 17471 <sup>T</sup>              | 0         |   |           |                       |                                              |
|                         | <i>O. pecoris</i> DSM 23868 <sup>T</sup>             | 0         |   |           |                       |                                              |
|                         | <i>O. pituitosum</i> AA22                            | 1         | - | +         |                       | CP018782.1                                   |
|                         | <i>O. pseudointermedium</i> DSM 17490 <sup>T</sup>   | 0         |   |           |                       |                                              |
|                         | <i>O. pseudogrignonense</i> CCUG 30717 <sup>T</sup>  | 2         | - | +         |                       | NNRM01000020.1                               |
|                         | <i>O. rhizosphaerae</i> PR17 <sup>T</sup>            | 2         | - | +         |                       | NNRK01000035.1                               |
|                         | <i>O. shirianus</i>                                  | 0         |   |           |                       |                                              |
|                         | <i>O. thiophenivorans</i> DSM 7216 <sup>T</sup>      | 1         |   | n.m./n.d. |                       | Kämpfer et al., 2008 (10.1099/ijs.0.65407-0) |
|                         | <i>O. tritici</i> DSM 13340 <sup>T</sup>             | 0         |   |           |                       |                                              |
| <i>Paenochrobactrum</i> | <i>P. gallinarii</i> CCUG 57736 <sup>T</sup>         | 0         |   |           |                       |                                              |

|                           |                                                   |                                                       |   |   |   |                |                |
|---------------------------|---------------------------------------------------|-------------------------------------------------------|---|---|---|----------------|----------------|
|                           | <i>P. glaciei</i> JCM 15115 <sup>T</sup>          | 0                                                     |   |   |   |                |                |
|                           | <i>P. pullorum</i> LMG 28095 <sup>T</sup>         | 0                                                     |   |   |   |                |                |
| <i>Pseudochrobactrum</i>  | <i>P. asaccharolytium</i> CIP 108977 <sup>T</sup> | 0                                                     |   |   |   |                |                |
|                           | <i>P. kiredjianiae</i> CIP 109227 <sup>T</sup>    | 0                                                     |   |   |   |                |                |
|                           | <i>P. lubricantis</i> CCUG 56963 <sup>T</sup>     | 0                                                     |   |   |   |                |                |
|                           | <i>P. saccharolyticum</i> CIP 108976 <sup>T</sup> | 0                                                     |   |   |   |                |                |
| <i>Cohaesibacteraceae</i> | <i>Breoghania</i>                                 | <i>B. corrubedonensis</i> DSM 23382 <sup>T</sup>      | 0 |   |   |                |                |
|                           | <i>Cohaesibacter</i>                              | <i>C. gelatinilyticus</i> DSM 18289 <sup>T</sup>      | 0 |   |   |                |                |
|                           |                                                   | <i>C. haloalkalitolerans</i> NBRC 109022 <sup>T</sup> | 0 |   |   |                |                |
|                           |                                                   | <i>C. marisflavi</i> CGMCC 1.9157 <sup>T</sup>        | 1 | + | + | FOVR01000010.1 | FOVR01000002.1 |
| <i>Hyphomicrobiaceae</i>  | <i>Ancalomicrobium</i>                            | <i>A. adetum</i> DSM 4722 <sup>T</sup>                | 0 |   |   |                |                |
|                           | <i>Angulomicrobium</i>                            | <i>A. amanitifforme</i> DSM 15561 <sup>T</sup>        | 0 |   |   |                |                |
|                           |                                                   | <i>A. tetradrale</i> DSM 5895 <sup>T</sup>            | 0 |   |   |                |                |
|                           | <i>Aquabacter</i>                                 | <i>A. spiritensis</i> DSM 9035 <sup>T</sup>           | 0 |   |   |                |                |
|                           | <i>Arsenicitalea</i>                              | <i>A. aurantica</i> KCTC 42835 <sup>T</sup>           | 0 |   |   |                |                |
|                           | <i>Blastochloris</i>                              | <i>B. gulmargensis</i> DSM 19786 <sup>T</sup>         | 0 |   |   |                |                |
|                           |                                                   | <i>B. sulfovirdis</i> DSM 729 <sup>T</sup>            | 0 |   |   |                |                |
|                           |                                                   | <i>B. viridis</i> DSM 133 <sup>T</sup>                | 3 | + | - | AP014854.2     |                |
|                           | <i>Cucumibacter</i>                               | <i>C. marinus</i> DSM 18995 <sup>T</sup>              | 1 | + | - | AUCR01000009.1 |                |
|                           | <i>Devosia</i>                                    | <i>D. albogilva</i> MTCC 8594 <sup>T</sup>            | 0 |   |   |                |                |
|                           |                                                   | <i>D. chinhatensis</i> IPL18 <sup>T</sup>             | 1 | + | - | JZEY01000054.1 |                |
|                           |                                                   | <i>D. confluentis</i> NBRC 112271 <sup>T</sup>        | 0 |   |   |                |                |
|                           |                                                   | <i>D. crocina</i> IPL20 <sup>T</sup>                  | 1 | + | - | FPCK01000001.1 |                |
|                           |                                                   | <i>D. enhydra</i> ATCC 23634 <sup>T</sup>             | 1 | + | - | FPKU01000001.1 |                |
|                           |                                                   | <i>D. epidermidihirudinis</i> E84 <sup>T</sup>        | 1 | + | - | LANJ01000045.1 |                |
|                           |                                                   | <i>D. geojensis</i> BD-c194 <sup>T</sup>              | 1 | + | - | JZEX01000147.1 |                |
|                           |                                                   | <i>D. ginsengisoli</i>                                | 0 |   |   |                |                |
|                           |                                                   | <i>D. glacialis</i> LMG 26051 <sup>T</sup>            | 0 |   |   |                |                |
|                           |                                                   | <i>D. honganensis</i> ATCC 19737 <sup>T</sup>         | 0 |   |   |                |                |
|                           |                                                   | <i>D. humi</i> KACC 18281 <sup>T</sup>                | 0 |   |   |                |                |
|                           |                                                   | <i>D. hwasunensis</i>                                 | 0 |   |   |                |                |
|                           |                                                   | <i>D. insulae</i> DS-56 <sup>T</sup>                  | 1 | + | - | LAJE02000291.1 |                |
|                           |                                                   | <i>D. limi</i> DSM 17137 <sup>T</sup>                 | 2 | + | - | FQVC01000004.1 |                |
|                           |                                                   | <i>D. lucknowensis</i> L15 <sup>T</sup>               | 1 | + | - | FXWK01000001.1 |                |
|                           |                                                   | <i>D. mishustinii</i> CCM 7569 <sup>T</sup>           | 0 |   |   |                |                |
|                           |                                                   | <i>D. nanyangense</i>                                 | 0 |   |   |                |                |
|                           |                                                   | <i>D. neptuniae</i> LMG 21357 <sup>T</sup>            | 0 |   |   |                |                |
|                           |                                                   | <i>D. pacifica</i> KCTC 32437 <sup>T</sup>            | 0 |   |   |                |                |
|                           |                                                   | <i>D. psychrophila</i> Cr7-05 <sup>T</sup>            | 2 | + | - | LAPV01000086.1 |                |
|                           |                                                   | <i>D. riboflavina</i> IFO13584 <sup>T</sup>           | 1 | + | - | JQGC01000035.1 |                |
|                           |                                                   | <i>D. soli</i> GH2-10 <sup>T</sup>                    | 1 | + | - | LAJG01000014.1 |                |
|                           |                                                   | <i>D. subaequois</i> KCTC 12772 <sup>T</sup>          | 0 |   |   |                |                |
|                           |                                                   | <i>D. submarina</i> NRIC 0884 <sup>T</sup>            | 0 |   |   |                |                |
|                           |                                                   | <i>D. terrae</i>                                      | 0 |   |   |                |                |
|                           |                                                   | <i>D. yakushimensis</i> LMG 24299 <sup>T</sup>        | 0 |   |   |                |                |
|                           | <i>Dichotomicrobium</i>                           | <i>D. thermohalophilum</i> DSM 5002 <sup>T</sup>      | 0 |   |   |                |                |
|                           | <i>Filomicrobium</i>                              | <i>F. fusiforme</i> DSM 5304 <sup>T</sup>             | 0 |   |   |                |                |
|                           |                                                   | <i>F. insigne</i> CGMCC 1.6497 <sup>T</sup>           | 1 | - | + | FNJC01000002.1 |                |
| <i>Hyphomicrobium</i>     |                                                   | <i>H. aestuarii</i> ATCC 27483 <sup>T</sup>           | 0 |   |   |                |                |
|                           |                                                   | <i>H. chloromethanicum</i> NCIMB 13687 <sup>T</sup>   | 0 |   |   |                |                |
|                           |                                                   | <i>H. denitrificans</i> ATCC 51888 <sup>T</sup>       | 2 | - | + | CP002083.1     |                |
|                           |                                                   | <i>H. facile</i> DSM 1565 <sup>T</sup>                | 1 | - | + | FPCH01000003.1 |                |
|                           |                                                   | <i>H. hollandicum</i> ATCC 27498 <sup>T</sup>         | 0 |   |   |                |                |
|                           |                                                   | <i>H. methylovorum</i> DSM 5458 <sup>T</sup>          | 0 |   |   |                |                |

|                              |                                                 |   |           |   |                                                  |                |
|------------------------------|-------------------------------------------------|---|-----------|---|--------------------------------------------------|----------------|
|                              | <i>H. nitratorans</i> NL23 <sup>T</sup>         | 1 | -         | + |                                                  | NC_022997.1    |
|                              | <i>H. sulfonivorans</i> WDL6                    | 1 | -         | + |                                                  | LMTR01000065.1 |
|                              | <i>H. vulgare</i> ATCC 33404 <sup>T</sup>       | 0 |           |   |                                                  |                |
|                              | <i>H. zavarzinii</i> ATCC 27496 <sup>T</sup>    | 1 | -         | + |                                                  | KB911255.1     |
| <i>Maritalea</i>             | <i>M. mobilis</i> JCM 15144 <sup>T</sup>        | 0 |           |   |                                                  |                |
|                              | <i>M. myrionectae</i> DSM 19524 <sup>T</sup>    | 1 | +         | - | AUHV01000003.1                                   |                |
|                              | <i>M. porphyrae</i> LMG 25872 <sup>T</sup>      | 0 |           |   |                                                  |                |
| <i>Methylobacterium</i>      | <i>M. multivorans</i> ATCC 51890 <sup>T</sup>   | 0 |           |   |                                                  |                |
| <i>Methylobacterium</i>      | <i>M. soli</i> JCM 30821 <sup>T</sup>           | 0 |           |   |                                                  |                |
| <i>Paradevosi</i>            | <i>P. shaoguanensis</i> LMG 27409 <sup>T</sup>  | 0 |           |   |                                                  |                |
| <i>Pedomicrobium</i>         | <i>P. americanum</i> ATCC 43612 <sup>T</sup>    | 0 |           |   |                                                  |                |
|                              | <i>P. australicum</i> ATCC 43611 <sup>T</sup>   | 0 |           |   |                                                  |                |
|                              | <i>P. ferrugineum</i> ATCC 33119 <sup>T</sup>   | 0 |           |   |                                                  |                |
|                              | <i>P. manganicum</i> ATCC 33121 <sup>T</sup>    | 0 |           |   |                                                  |                |
| <i>Pelagibacterium</i>       | <i>P. halotolerans</i> B2 <sup>T</sup>          | 1 | +         | - | NC_016078.1                                      |                |
|                              | <i>P. lentulum</i> KCTC 52551 <sup>T</sup>      | 0 |           |   |                                                  |                |
|                              | <i>P. luteolum</i> CGMCC 1.10267 <sup>T</sup>   | 1 | +         | - | FNCS01000013.1                                   |                |
|                              | <i>P. nitratreducens</i> JCM 17767 <sup>T</sup> | 0 |           |   |                                                  |                |
|                              | <i>P. rhizosphaerae</i> KACC 18791 <sup>T</sup> | 0 |           |   |                                                  |                |
| <i>Polyprothecobacterium</i> | <i>P. yinchuanense</i>                          | 0 |           |   |                                                  |                |
| <i>Prothecobacterium</i>     | <i>P. hirschii</i> 16                           | 1 | +         | - | LJYW01000001.1                                   |                |
|                              | <i>P. pneumaticum</i> DSM 8972 <sup>T</sup>     | 0 |           |   |                                                  |                |
| <i>Rhodomicrobium</i>        | <i>R. udaipurensis</i> JA643 <sup>T</sup>       | 1 | -         | + | JFZJ01000032.1                                   |                |
|                              | <i>R. vannielii</i> ATCC 17100 <sup>T</sup>     | 2 | -         | + | CP002292.1                                       |                |
| <i>Rhodoplanes</i>           | <i>R. elegans</i> DSM 11907 <sup>T</sup>        | 0 |           |   |                                                  |                |
|                              | <i>R. oryzae</i> NBRC 109406 <sup>T</sup>       | 0 |           |   |                                                  |                |
|                              | <i>R. piscinae</i> KCTC 5627 <sup>T</sup>       | 0 |           |   |                                                  |                |
|                              | <i>R. pokkaliisoli</i> NBRC 104972 <sup>T</sup> | 0 |           |   |                                                  |                |
|                              | <i>R. roseus</i> DSM 5909 <sup>T</sup>          | 0 |           |   |                                                  |                |
|                              | <i>R. serenus</i> DSM 18633 <sup>T</sup>        | 0 |           |   |                                                  |                |
|                              | <i>R. tepidamans</i> DSM 9987 <sup>T</sup>      | 0 |           |   |                                                  |                |
| <i>Robiginosimarina</i>      | <i>R. monoshimaensis</i>                        | 0 |           |   |                                                  |                |
| <i>Seliberia</i>             | <i>S. tellata</i> JCM 21594 <sup>T</sup>        | 0 |           |   |                                                  |                |
| <i>Youhaiella</i>            | <i>Y. tibetensis</i> JCM 19854 <sup>T</sup>     | 0 |           |   |                                                  |                |
| <i>Meganema</i>              | <i>M. perideroedes</i> DSM 15528 <sup>T</sup>   | 1 | n.m./n.d. |   | McIlroy et al., 2015 (10.1186/s40793-015-0013-1) |                |
| <i>Methylobacteriaceae</i>   | <i>E. rhinocerotis</i> DSM 25903 <sup>T</sup>   | 0 |           |   |                                                  |                |
| <i>Methylobacterium</i>      | <i>M. adhaesivum</i> CECT 7069 <sup>T</sup>     | 0 |           |   |                                                  |                |
|                              | <i>M. aerolatum</i> DSM 19013 <sup>T</sup>      | 0 |           |   |                                                  |                |
|                              | <i>M. aminovorans</i> ATCC 51358 <sup>T</sup>   | 0 |           |   |                                                  |                |
|                              | <i>M. aquaticum</i> DSM 16371 <sup>T</sup>      | 5 | +         | + | LABX01000173.1                                   | LABX01000132.1 |
|                              | <i>M. branchiatum</i> 111MFTsu3.1M4             | 1 | +         | + | FOQW01000013.1                                   | FOQW01000020.1 |
|                              | <i>M. brachythecii</i> DSM 24105 <sup>T</sup>   | 0 |           |   |                                                  |                |
|                              | <i>M. bullatum</i> DSM 21893 <sup>T</sup>       | 0 |           |   |                                                  |                |
|                              | <i>M. cerastii</i> DSM 23679 <sup>T</sup>       | 0 |           |   |                                                  |                |
|                              | <i>M. dankookense</i> DSM 22415 <sup>T</sup>    | 0 |           |   |                                                  |                |
|                              | <i>M. extorquens</i> DM4 <sup>T</sup>           | 7 | +         | + | NC_012988.1                                      | NC_012988.1    |
|                              | <i>M. fujisawaense</i> DSM 5686 <sup>T</sup>    | 0 |           |   |                                                  |                |
|                              | <i>M. gnaphalii</i> DSM 24027 <sup>T</sup>      | 0 |           |   |                                                  |                |
|                              | <i>M. goesingense</i> DSM 21331 <sup>T</sup>    | 0 |           |   |                                                  |                |
|                              | <i>M. gossipicola</i> Gh-105 <sup>T</sup>       | 1 | +         | - | FOPM01000007.1                                   |                |
|                              | <i>M. gregans</i> DSM 19564 <sup>T</sup>        | 0 |           |   |                                                  |                |
|                              | <i>M. haplocladii</i> DSM 24195 <sup>T</sup>    | 0 |           |   |                                                  |                |
|                              | <i>M. hispanicum</i> DSM 16372 <sup>T</sup>     | 0 |           |   |                                                  |                |
|                              | <i>M. indicum</i> SE2.11 <sup>T</sup>           | 2 | +         | + | JTHF01000313.1                                   | JTHF01000098.1 |

|                  |                                                  |   |   |          |                |                |                                           |
|------------------|--------------------------------------------------|---|---|----------|----------------|----------------|-------------------------------------------|
|                  | <i>M. iners</i> DSM 19015 <sup>T</sup>           | 0 |   |          |                |                |                                           |
|                  | <i>M. isbiliense</i> CECT 7068 <sup>T</sup>      | 0 |   |          |                |                |                                           |
|                  | <i>M. jeotgali</i> LMG 23639 <sup>T</sup>        | 0 |   |          |                |                |                                           |
|                  | <i>M. komagatae</i> DSM 19563 <sup>T</sup>       | 0 |   |          |                |                |                                           |
|                  | <i>M. longum</i> DSM 23933 <sup>T</sup>          | 0 |   |          |                |                |                                           |
|                  | <i>M. marchantiae</i> DSM 21328 <sup>T</sup>     | 0 |   |          |                |                |                                           |
|                  | <i>M. mesophilicum</i> SR1.6/6                   | 1 | + | -        | ANPA01000018.1 |                |                                           |
|                  | <i>M. nodulans</i> ORS 2060 <sup>T</sup>         | 1 | + | -        | NC_011894.1    |                |                                           |
|                  | <i>M. organophilum</i> DSM 760 <sup>T</sup>      | 0 |   |          |                |                |                                           |
|                  | <i>M. oryzae</i> CBMB20 <sup>T</sup>             | 1 | + | +        | CP003811.1     | CP003811.1     |                                           |
|                  | <i>M. oxalidis</i> DSM 24028 <sup>T</sup>        | 0 |   |          |                |                |                                           |
|                  | <i>M. persicinum</i> DSM 19562 <sup>T</sup>      | 0 |   |          |                |                |                                           |
|                  | <i>M. phyllosphaerae</i> CBMB27 <sup>T</sup>     | 3 | + | -        | CP015367.1     |                |                                           |
|                  | <i>M. phyllostachyos</i> BL47 <sup>T</sup>       | 1 | + | +        | FNHS01000014.1 | FNHS01000008.1 |                                           |
|                  | <i>M. platani</i> PMB02 <sup>T</sup>             | 3 | + | +        | LWHQ01000006.1 | LWHQ01000004.1 |                                           |
|                  | <i>M. podarium</i> DSM 15083 <sup>T</sup>        | 0 |   |          |                |                |                                           |
|                  | <i>M. populi</i> BJ001 <sup>T</sup>              | 3 | + | +        | CP001029.1     | CP001029.1     |                                           |
|                  | <i>M. pseudosasa</i> NBRC 105205 <sup>T</sup>    | 0 |   |          |                |                |                                           |
|                  | <i>M. pseudosasicola</i> BL36 <sup>T</sup>       | 1 | + | -        | FOTK01000006.1 |                |                                           |
|                  | <i>M. radiotolerans</i> JMC 2831 <sup>T</sup>    | 7 | + | +        | CP001001.1     | CP001001.1     |                                           |
|                  | <i>M. lusitanum</i> DSM 14457 <sup>T</sup>       | 0 |   |          |                |                |                                           |
|                  | <i>M. rhodesianum</i> DSM 5687 <sup>T</sup>      | 0 |   |          |                |                |                                           |
|                  | <i>M. rhodinum</i> JCM 2811 <sup>T</sup>         | 1 |   | n.d.     |                |                |                                           |
|                  | <i>M. salsuginis</i> CGMCC 1.6474 <sup>T</sup>   | 1 | + | +        | FOSV01000002.1 | FOSV01000017.1 |                                           |
|                  | <i>M. soli</i> KCTC 22810 <sup>T</sup>           | 0 |   |          |                |                |                                           |
|                  | <i>M. specialis</i>                              | 0 |   |          |                |                |                                           |
|                  | <i>M. suomiense</i> DSM 14458 <sup>T</sup>       | 0 |   |          |                |                |                                           |
|                  | <i>M. tardum</i> DSM 19566 <sup>T</sup>          | 0 |   |          |                |                |                                           |
|                  | <i>M. tarhaniae</i> DSM 25844 <sup>T</sup>       | 1 | + | +        | LABZ01000200.1 | LABZ01000071.1 |                                           |
|                  | <i>M. thiocyanatum</i> JCM 10893 <sup>T</sup>    | 1 |   | n.d.     |                |                |                                           |
|                  | <i>M. thuringiense</i> LMG 25777 <sup>T</sup>    | 0 |   |          |                |                |                                           |
|                  | <i>M. trifolii</i> LMG 25778 <sup>T</sup>        | 0 |   |          |                |                |                                           |
|                  | <i>M. variabile</i> DSM 16961 <sup>T</sup>       | 1 | + | +        | LABY01000037.1 | LABY01000026.1 |                                           |
|                  | <i>M. zatmanii</i> PSBB041                       | 1 | + | +        |                | CP021054..1    |                                           |
| Microvirga       | <i>M. aerilata</i> NBRC 106137 <sup>T</sup>      | 0 |   |          |                |                |                                           |
|                  | <i>M. aerophila</i> NBRC 106136 <sup>T</sup>     | 0 |   |          |                |                |                                           |
|                  | <i>M. arabica</i> DSM 25393 <sup>T</sup>         | 0 |   |          |                |                |                                           |
|                  | <i>M. flocculans</i> ATCC BAA-817 <sup>T</sup>   | 1 | - | +        |                | JAEA01000009.1 |                                           |
|                  | <i>M. guangxiensis</i> CGMCC 1.7666 <sup>T</sup> | 1 | - | +        |                | FMVJ01000002.1 |                                           |
|                  | <i>M. indica</i> KACC 18792 <sup>T</sup>         | 0 |   |          |                |                |                                           |
|                  | <i>M. lotononidis</i> WSM3557 <sup>T</sup>       | 1 | - | +        |                | JH660647.1     |                                           |
|                  | <i>M. lupini</i> Lut6 <sup>T</sup>               | 1 |   | n.m/n.d. |                |                | Reeve et al., 2014 (10.4056/sigs.5249382) |
|                  | <i>M. makkahensis</i> DSM 25394 <sup>T</sup>     | 0 |   |          |                |                |                                           |
|                  | <i>M. massiliensis</i> JC119 <sup>T</sup>        | 2 | + | +        | CAHM01000265.1 | CAHM01000317.1 |                                           |
|                  | <i>M. oossetica</i> LMG 29787 <sup>T</sup>       | 0 |   |          |                |                |                                           |
|                  | <i>M. soli</i> NBRC 112417 <sup>T</sup>          | 0 |   |          |                |                |                                           |
|                  | <i>M. subterranea</i> DSM 14364 <sup>T</sup>     | 0 |   |          |                |                |                                           |
|                  | <i>M. vignae</i> BR3299 <sup>T</sup>             | 1 | - | +        |                | LCYG01000014.1 |                                           |
|                  | <i>M. zambiensis</i> LMG 26454 <sup>T</sup>      | 0 |   |          |                |                |                                           |
| Neomegalonema    | <i>N. perideroedes</i> DSM 15528 <sup>T</sup>    | 1 |   | n.d.     |                |                |                                           |
|                  | <i>P. arctica</i> KACC 17684 <sup>T</sup>        | 0 |   |          |                |                |                                           |
| Methylocystaceae | <i>Albibacter</i>                                |   |   |          |                |                |                                           |
|                  | <i>A. helveticus</i> CIP 106788 <sup>T</sup>     | 0 |   |          |                |                |                                           |
|                  | <i>A. methylovorans</i> DSM 22840 <sup>T</sup>   | 0 |   |          |                |                |                                           |
|                  | <i>Chthonobacter</i>                             |   |   |          |                |                |                                           |
|                  | <i>C. albigriseus</i> JCM 30603 <sup>T</sup>     | 0 |   |          |                |                |                                           |

|                           |                                                  |          |  |           |          |                                                 |
|---------------------------|--------------------------------------------------|----------|--|-----------|----------|-------------------------------------------------|
| <i>Hansschlegelia</i>     | <i>H. beijingsensis</i> DSM 25481 <sup>T</sup>   | 0        |  |           |          |                                                 |
|                           | <i>H. plantiphila</i> NCIMB 14035 <sup>T</sup>   | 0        |  |           |          |                                                 |
|                           | <i>H. zhuhuaiae</i> DSM 18984 <sup>T</sup>       | 0        |  |           |          |                                                 |
| <i>Methylocystis</i>      | <i>M. bryophila</i> S285                         | 1        |  | n.m./n.d. |          | Belova et al., 2013 (10.1099/ijs.0.043505-0)    |
|                           | <i>M. echinoides</i> IMET 10491 <sup>T</sup>     | 0        |  |           |          |                                                 |
|                           | <i>M. heyeri</i> DSM16984 <sup>T</sup>           | 0        |  |           |          |                                                 |
|                           | <i>M. hirsuta</i> DSM 18500 <sup>T</sup>         | 0        |  |           |          |                                                 |
|                           | <i>M. methanolicus</i>                           | 0        |  |           |          |                                                 |
|                           | <i>M. minimus</i>                                | 0        |  |           |          |                                                 |
|                           | <i>M. parvus</i> OBBP <sup>T</sup>               | 1        |  | -         | +        | AJTV01000013.1                                  |
|                           | <i>M. pyriformis</i>                             | 0        |  |           |          |                                                 |
|                           | <i>M. rosea</i> SV97 <sup>T</sup>                | 1        |  | n.m./n.d. |          | Wartiainen et al., 2006 (10.1099/ijs.0.63912-0) |
| <i>Methylophila</i>       | <i>M. capsulata</i> DSM 6130 <sup>T</sup>        | 0        |  |           |          |                                                 |
|                           | <i>M. henanensis</i> LMG 25959 <sup>T</sup>      | 0        |  |           |          |                                                 |
|                           | <i>M. jiangsuensis</i> DSM 22718 <sup>T</sup>    | 0        |  |           |          |                                                 |
|                           | <i>M. musalis</i> DSM 24986 <sup>T</sup>         | 0        |  |           |          |                                                 |
|                           | <i>M. oligotrophica</i> CCUG 63805 <sup>T</sup>  | 0        |  |           |          |                                                 |
|                           | <i>M. turkensis</i> DSM 27566 <sup>T</sup>       | 0        |  |           |          |                                                 |
| <i>Methylosinus</i>       | <i>M. acidophilus</i>                            | 0        |  |           |          |                                                 |
|                           | <i>M. pucelana</i>                               | 0        |  |           |          |                                                 |
|                           | <i>M. sporium</i> ATCC 35069 <sup>T</sup>        | 0        |  |           |          |                                                 |
|                           | <i>M. trichosporium</i> OB3b <sup>T</sup>        | 1        |  | -         | +        | ADVE02000001.1                                  |
| <i>Methylosporovibrio</i> | <i>M. methanica</i>                              | 0        |  |           |          |                                                 |
| <i>Oharaebacter</i>       | <i>O. diazotrophicus</i> DSM 102969 <sup>T</sup> | 0        |  |           |          |                                                 |
| <i>Pleomorphomonas</i>    | <i>P. diazotrophica</i> DSM 25022 <sup>T</sup>   | 0        |  |           |          |                                                 |
|                           | <i>P. koreensis</i> DSM 23070 <sup>T</sup>       | 1        |  | +         | -        | AULH01000007.1                                  |
|                           | <b><i>P. oryzae</i> DSM 16300<sup>T</sup></b>    | <b>1</b> |  | <b>+</b>  | <b>+</b> | <b>AUHB01000012.1</b> <b>AUHB01000003.1</b>     |
| <i>Terasakiella</i>       | <i>T. brassicae</i> KCTC 42652 <sup>T</sup>      | 0        |  |           |          |                                                 |
|                           | <i>T. pusilla</i> DSM 6293 <sup>T</sup>          | 1        |  | +         | -        | JHYO01000010.1                                  |
| Phyllobacteriaceae        | <i>Aliihoeflea</i>                               | 0        |  |           |          |                                                 |
|                           | <i>A. aestuarii</i> DSM 19536 <sup>T</sup>       | 0        |  |           |          |                                                 |
|                           | <i>A. aganoensis</i> DSM 7051 <sup>T</sup>       | 0        |  |           |          |                                                 |
|                           | <i>A. aminovorans</i> KCTC 2477                  | 1        |  | -         | +        | CP015005.1                                      |
|                           | <i>A. anthyllidis</i> LMG 26462 <sup>T</sup>     | 0        |  |           |          |                                                 |
|                           | <i>A. ciceronei</i> ATCC 202197 <sup>T</sup>     | 0        |  |           |          |                                                 |
|                           | <i>A. lissarensis</i> NCIMB 13789 <sup>T</sup>   | 0        |  |           |          |                                                 |
|                           | <i>A. niigataensis</i> DSM 7050 <sup>T</sup>     | 0        |  |           |          |                                                 |
|                           | <i>A. aerolatum</i> DSM 21857 <sup>T</sup>       | 1        |  | n.d.      |          |                                                 |
|                           | <i>A. aestuarii</i> JCM 16876 <sup>T</sup>       | 0        |  |           |          |                                                 |
|                           | <i>A. ahrensii</i> DSM 19730 <sup>T</sup>        | 0        |  |           |          |                                                 |
|                           | <i>A. defluvii</i> W13Z1                         | 1        |  | -         | +        | JENY01000006.1                                  |
|                           | <i>A. lusatiense</i> DSM 11099 <sup>T</sup>      | 0        |  |           |          |                                                 |
|                           | <i>A. segne</i> DSM 18714 <sup>T</sup>           | 0        |  |           |          |                                                 |
|                           | <i>A. soli</i> KCTC 52165 <sup>T</sup>           | 0        |  |           |          |                                                 |
|                           | <i>A. terrae</i> DSM 27865 <sup>T</sup>          | 0        |  |           |          |                                                 |
|                           | <i>Chelativorans</i>                             | 0        |  |           |          |                                                 |
|                           | <i>C. composti</i> JCM 17863 <sup>T</sup>        | 0        |  |           |          |                                                 |
|                           | <i>C. intermedius</i> DSM 29391 <sup>T</sup>     | 0        |  |           |          |                                                 |
|                           | <i>C. multitrophicus</i> DSM 9103 <sup>T</sup>   | 0        |  |           |          |                                                 |
|                           | <i>C. oligotrophicus</i> DSM 19276 <sup>T</sup>  | 0        |  |           |          |                                                 |
| <i>Corticibacterium</i>   | <i>C. populi</i> KCTC 42249 <sup>T</sup>         | 0        |  |           |          |                                                 |
| <i>Hoeflea</i>            | <i>H. alexandrii</i> DSM 16655 <sup>T</sup>      | 0        |  |           |          |                                                 |
|                           | <i>H. anabaenae</i> CCUG 56626 <sup>T</sup>      | 0        |  |           |          |                                                 |
|                           | <i>H. halophila</i> JCM 16715 <sup>T</sup>       | 0        |  |           |          |                                                 |
|                           | <i>H. marina</i> ATCC 25654 <sup>T</sup>         | 0        |  |           |          |                                                 |
|                           | <i>H. olei</i> JC234 <sup>T</sup>                | 1        |  | -         | +        | LQZT01000042.1                                  |



|                          |                                                  |    |   |      |                |
|--------------------------|--------------------------------------------------|----|---|------|----------------|
|                          | <i>H. phototrophica</i> DFL-43 <sup>T</sup>      | 1  | - | +    | CM002917.1     |
|                          | <i>H. siderophila</i>                            | 0  |   |      |                |
| <i>Lentilitoribacter</i> | <i>L. donghaensis</i> KCTC 32082 <sup>T</sup>    | 0  |   |      |                |
| <i>Mesorhizobium</i>     | <i>M. abyssinicae</i> LMG 26967 <sup>T</sup>     | 0  |   |      |                |
|                          | <i>M. acaciae</i> JCM 30534 <sup>T</sup>         | 0  |   |      |                |
|                          | <i>M. albiziae</i> DSM 21822 <sup>T</sup>        | 0  |   |      |                |
|                          | <i>M. alhagi</i> CCNWXJ12-2 <sup>T</sup>         | 1  | - | +    | AHAM01000061.1 |
|                          | <i>M. amorphae</i> CCNWGS0123                    | 3  | - | +    | CP015318.1     |
|                          | <i>M. australicum</i> WSM2073 <sup>T</sup>       | 2  | - | +    | CP003358.1     |
|                          | <i>M. calcicola</i> LMG 28224 <sup>T</sup>       | 0  |   |      |                |
|                          | <i>M. cameltorni</i> ATCC 14549 <sup>T</sup>     | 0  |   |      |                |
|                          | <i>M. cantuariense</i> LMG 28225 <sup>T</sup>    | 0  |   |      |                |
|                          | <i>M. caraganae</i> LMG 24397 <sup>T</sup>       | 0  |   |      |                |
|                          | <i>M. chacoense</i> DSM 17287 <sup>T</sup>       | 0  |   |      |                |
|                          | <i>M. ciceri</i> WSM1271                         | 6  | - | +    | CP002447.1     |
|                          | <i>M. delmonti</i> LMG 29640 <sup>T</sup>        | 0  |   |      |                |
|                          | <i>M. erdmanii</i> USDA 3471 <sup>T</sup>        | 1  | - | +    | KI421455.1     |
|                          | <i>M. gobiense</i> LMG 23949 <sup>T</sup>        | 0  |   |      |                |
|                          | <i>M. hawassense</i> LMG 26968 <sup>T</sup>      | 0  |   |      |                |
|                          | <i>M. hemanticense</i> LMG 29734 <sup>T</sup>    | 0  |   |      |                |
|                          | <i>M. huakuii</i> 7653R                          | 1  | - | +    | CP006581.1     |
|                          | <i>M. japonicum</i> MAFF303099                   | 2  | - | +    | BA000012.4     |
|                          | <i>M. jarvisii</i> ATCC 33669 <sup>T</sup>       | 0  |   |      |                |
|                          | <i>M. kowhaii</i> LMG 28222 <sup>T</sup>         | 0  |   |      |                |
|                          | <i>M. loti</i> NZP2037                           | 20 | - | +    | CP016079.1     |
|                          | <i>M. mediterraneum</i> USDA 3392                | 1  |   | n.d. |                |
|                          | <i>M. metallidurans</i> STM 2683 <sup>T</sup>    | 1  |   | n.d. |                |
|                          | <i>M. muleiense</i> CGMCC 1.11022 <sup>T</sup>   | 1  |   | n.d. |                |
|                          | <i>M. newzealandense</i> LMG 28226 <sup>T</sup>  | 0  |   |      |                |
|                          | <i>M. olivaresii</i> LMG 29295 <sup>T</sup>      | 0  |   |      |                |
|                          | <i>M. opportunistum</i> WSM2075 <sup>T</sup>     | 1  | - | +    | NC_015675.1    |
|                          | <i>M. parafortuitum</i>                          | 0  |   |      |                |
|                          | <i>M. plurifarum</i> ORS 1032 <sup>T</sup>       | 4  | - | +    | CCND01000017.1 |
|                          | <i>M. prunaredense</i> 1                         | 1  |   | n.d. |                |
|                          | <i>M. qingshengii</i> CGMCC 1.12097 <sup>T</sup> | 1  | - | +    | FMXM01000006.1 |
|                          | <i>M. robinae</i> ACCC 14543 <sup>T</sup>        | 0  |   |      |                |
|                          | <i>M. sangaii</i> ACCC 13218 <sup>T</sup>        | 0  |   |      |                |
|                          | <i>M. sediminum</i> KCTC 42205 <sup>T</sup>      | 0  |   |      |                |
|                          | <i>M. septentrionale</i> LMG 23930 <sup>T</sup>  | 0  |   |      |                |
|                          | <i>M. shangrilense</i> LMG 24762 <sup>T</sup>    | 0  |   |      |                |
|                          | <i>M. shonense</i> LMG 26966 <sup>T</sup>        | 0  |   |      |                |
|                          | <i>M. silamurunense</i> LMG 24822 <sup>T</sup>   | 0  |   |      |                |
|                          | <i>M. soli</i> JCM 19897 <sup>T</sup>            | 0  |   |      |                |
|                          | <i>M. sophorae</i> ICMP 19535 <sup>T</sup>       | 1  | - | +    | NNRI01000008.1 |
|                          | <i>M. tamadayense</i> LMG 26736 <sup>T</sup>     | 0  |   |      |                |
|                          | <i>M. tarimense</i> LMG 24338 <sup>T</sup>       | 0  |   |      |                |
|                          | <i>M. temperatum</i> SDW018 <sup>T</sup>         | 1  |   | n.d. |                |
|                          | <i>M. thiogangeticum</i> LMG 22697 <sup>T</sup>  | 0  |   |      |                |
|                          | <i>M. tianshaense</i> DSM 11417 <sup>T</sup>     | 0  |   |      |                |
|                          | <i>M. waimense</i> LMG 28228 <sup>T</sup>        | 0  |   |      |                |
|                          | <i>M. waitaakense</i> LMG 28227 <sup>T</sup>     | 0  |   |      |                |
| <i>Nitrateductor</i>     | <i>N. aestuarii</i> LMG 29090 <sup>T</sup>       | 0  |   |      |                |
|                          | <i>N. aquibiodomus</i> JCM 21793 <sup>T</sup>    | 3  | - | +    | BAMP01000001.1 |
|                          | <i>N. aquimarinus</i> JCM 17288 <sup>T</sup>     | 0  |   |      |                |

|                                  |                                                  |    |           |   |                                             |
|----------------------------------|--------------------------------------------------|----|-----------|---|---------------------------------------------|
|                                  | <i>N. basaltis</i> RR3-28                        | 1  | -         | + | CP019044.1                                  |
|                                  | <i>N. indicus</i> C115 <sup>T</sup>              | 2  | -         | + | AMSI01000010.1                              |
|                                  | <i>N. kimnyeongensis</i> JCM 14851 <sup>T</sup>  | 0  |           |   |                                             |
|                                  | <i>N. lacus</i> KCTC 52186 <sup>T</sup>          | 0  |           |   |                                             |
|                                  | <i>N. lucknowense</i> DSM 24322 <sup>T</sup>     | 0  |           |   |                                             |
|                                  | <i>N. pacificus</i> pht-3B <sup>T</sup>          | 1  | -         | + | AMRM01000029.1                              |
|                                  | <i>N. shengliensis</i> LMG 27405 <sup>T</sup>    | 0  |           |   |                                             |
|                                  | <i>N. soli</i> ZZ-1 <sup>T</sup>                 | 1  | -         | + | LFVY01000010.1                              |
| <i>Oricola</i>                   | <i>O. cellulositytica</i> JCM 19534 <sup>T</sup> | 0  |           |   |                                             |
| <i>Paramesorhizobium</i>         | <i>P. deserti</i> A-3-E <sup>T</sup>             | 1  | -         | + | LNTU01000034.1                              |
| <i>Phyllobacterium</i>           | <i>P. bourgognense</i> LMG 22837 <sup>T</sup>    | 0  |           |   |                                             |
|                                  | <i>P. brassicacearum</i> LMG 22836 <sup>T</sup>  | 0  |           |   |                                             |
|                                  | <i>P. catacumbae</i> LMG 22520 <sup>T</sup>      | 0  |           |   |                                             |
|                                  | <i>P. endophyticum</i> LMG 26470 <sup>T</sup>    | 0  |           |   |                                             |
|                                  | <i>P. ifriqiyense</i> LMG 22831 <sup>T</sup>     | 0  |           |   |                                             |
|                                  | <i>P. laguminum</i> LMG 22833 <sup>T</sup>       | 0  |           |   |                                             |
|                                  | <i>P. loti</i> LMG 27289 <sup>T</sup>            | 0  |           |   |                                             |
|                                  | <i>P. myrsinacearum</i> DSM 5892 <sup>T</sup>    | 0  |           |   |                                             |
|                                  | <i>P. sophorae</i> LMG 27899 <sup>T</sup>        | 0  |           |   |                                             |
|                                  | <i>P. trifolii</i> LMG 22712 <sup>T</sup>        | 0  |           |   |                                             |
| <i>Pseudahrensia</i>             | <i>P. aquimaris</i> KCTC 23345 <sup>T</sup>      | 0  |           |   |                                             |
|                                  | <i>P. todarodis</i> JCM 30419 <sup>T</sup>       | 0  |           |   |                                             |
| <i>Pseudaminobacter</i>          | <i>P. defluvii</i> NBRC 14570 <sup>T</sup>       | 0  |           |   |                                             |
|                                  | <i>P. manganicus</i> JH-7 <sup>T</sup>           | 1  | -         | + | MDET01000003.1                              |
|                                  | <i>P. salicylatoxidans</i> KCT001                | 1  | -         | + | CAIU01000025.1                              |
| <i>Pseudohoeftia</i>             | <i>P. suedae</i> NBRC 107700 <sup>T</sup>        | 0  |           |   |                                             |
| <i>Roseitalea</i>                | <i>R. porphyridii</i> JCM 31538 <sup>T</sup>     | 0  |           |   |                                             |
| <i>Thalassocella</i>             | <i>T. subtropicalis</i>                          | 0  |           |   |                                             |
| <i>Thalassocola</i>              | <i>T. ureilytica</i> JCM 30682 <sup>T</sup>      | 0  |           |   |                                             |
| <i>Tianweitan</i>                | <i>T. sediminis</i> JCM 30358 <sup>T</sup>       | 0  |           |   |                                             |
| <i>Rhizobiaceae</i>              | <i>Amorphomonas</i>                              | 0  |           |   |                                             |
|                                  | <i>A. oryzae</i>                                 | 0  |           |   |                                             |
|                                  | <i>Carbophilus</i>                               | 0  |           |   |                                             |
|                                  | <i>Ciceribacter</i>                              | 0  |           |   |                                             |
|                                  | <i>C. thiooxidans</i> KCTC 5223 <sup>T</sup>     | 0  |           |   |                                             |
| <i>Kaistia</i>                   | <i>K. adipata</i> DSM 17808 <sup>T</sup>         | 1  | n.m./n.d. |   | Im et al., 2004 (10.2323/jgam.50.249)       |
|                                  | <i>K. dalseonensis</i> DSM 18800 <sup>T</sup>    | 0  |           |   |                                             |
|                                  | <i>K. defluvii</i> JCM 18034 <sup>T</sup>        | 0  |           |   |                                             |
|                                  | <i>K. geumhonensis</i> DSM 18799 <sup>T</sup>    | 0  |           |   |                                             |
|                                  | <i>K. granuli</i> DSM 23481 <sup>T</sup>         | 1  | n.m./n.d. |   | Lee et al., 2007 (10.1099/ij.s.0.65023-0)   |
|                                  | <i>K. hirudinis</i> LMG 26925 <sup>T</sup>       | 0  |           |   |                                             |
|                                  | <i>K. soli</i> DSM 19436 <sup>T</sup>            | 1  | n.m./n.d. |   | Weon et al., 20088 (10.1099/ij.s.0.65366-0) |
|                                  | <i>K. terrae</i> DSM 21341 <sup>T</sup>          | 0  |           |   |                                             |
| <i>Liberibacter</i> <sup>d</sup> | <i>L. africanus</i> PTSAPSY                      | 1  | -         | + | CP004021.1                                  |
|                                  | <i>L. americanus</i> Sao Paulo                   | 2  | -         | + | CP006604.1                                  |
|                                  | <i>L. asiaticus</i> psy62                        | 10 | -         | + | CP001677.5                                  |
|                                  | <i>L. crescens</i> BT-1 <sup>T</sup>             | 2  | -         | + | CP003789.1                                  |
|                                  | <i>L. europaeus</i>                              | 0  |           |   |                                             |
|                                  | <i>L. psyllaorus</i>                             | 0  |           |   |                                             |
|                                  | <i>L. solanacearum</i> CLso-ZC1                  | 7  | -         | + | CP002371.1                                  |
| <i>Agrobacterium</i>             | <i>A. agile</i>                                  | 0  |           |   |                                             |
|                                  | <i>A. albertimagni</i> AOL15                     | 1  | -         | + | ALJF01000010.1                              |
|                                  | <i>A. arsenijevicii</i> KFB 330 <sup>T</sup>     | 1  | -         | + | JWIT01000016.1                              |
|                                  | <i>A. aurantiacum</i>                            | 0  |           |   |                                             |
|                                  | <i>A. fabrum</i> C58 <sup>T</sup>                | 2  | -         | + | AE007869.2                                  |

|                        |                                                   |    |   |      |                |
|------------------------|---------------------------------------------------|----|---|------|----------------|
|                        | <i>A. larrymoorei</i> ATCC 51759 <sup>T</sup>     | 1  |   | n.d. |                |
|                        | <i>A. rhizogenes</i> K599                         | 9  | - | +    | CP019701.1     |
|                        | <i>A. rubi</i> NBRC 13261 <sup>T</sup>            | 2  |   | n.d. |                |
|                        | <i>A. salinitolerans</i> YIC 5082 <sup>T</sup>    | 1  | - | +    | MRDH01000013.1 |
|                        | <i>A. tumefaciens</i> Ach5                        | 38 | - | +    | CP011246.1     |
|                        | <i>A. viscosum</i>                                | 0  |   |      |                |
|                        | <i>A. vitis</i> S4                                | 13 | - | +    | CP000633.1     |
| <i>Neorhizobium</i>    | <i>N. alkalisoli</i> LMG 24763 <sup>T</sup>       | 0  |   |      |                |
|                        | <i>N. galegae</i> HAMBI 540 <sup>T</sup>          | 10 | - | +    | HG938353.1     |
|                        | <i>N. huautlense</i> LMG 18254 <sup>T</sup>       | 0  |   |      |                |
| <i>Pararhizobium</i>   | <i>P. antarcticum</i> 59                          | 1  | - | +    | LSRP01000094.1 |
|                        | <i>P. capsulatum</i> DSM 1112 <sup>T</sup>        | 0  |   |      |                |
|                        | <i>P. polonicum</i> F5.1 <sup>T</sup>             | 1  | - | +    | LGLV01000018.1 |
| <i>Pseudorhizobium</i> | <i>P. pelagicum</i> R1-200B4 <sup>T</sup>         | 2  | - | +    | JOKI01000001.1 |
| <i>Rhizobium</i>       | <i>R. acidisoli</i> FH23                          | 1  | - | +    | LJSR01000011.1 |
|                        | <i>R. aegyptiacum</i> 950                         | 1  |   | n.d. |                |
|                        | <i>R. aethiopicum</i> HBR26 <sup>T</sup>          | 1  | - | +    | FMAJ01000014.1 |
|                        | <i>R. aggregatum</i> DSM 1111 <sup>T</sup>        | 0  |   |      |                |
|                        | <i>R. alamii</i> YR540                            | 2  | - | +    | JQMB01000017.1 |
|                        | <i>R. alvei</i> LMG 26895 <sup>T</sup>            | 0  |   |      |                |
|                        | <i>R. anhuiense</i> WYCCWR10015                   | 1  | - | +    | LWMO01000062.1 |
|                        | <i>R. arachis</i>                                 | 0  |   |      |                |
|                        | <i>R. arenae</i> MIM27 <sup>T</sup>               | 1  | - | +    | MOOY01000008.1 |
|                        | <i>R. azibense</i> CCBAU 10108 <sup>T</sup>       | 0  |   |      |                |
|                        | <i>R. azooxidifex</i> DSM 100211 <sup>T</sup>     | 0  |   |      |                |
|                        | <i>R. bangladeshense</i> 1017                     | 3  | - | +    | LYPK01000011.1 |
|                        | <i>R. binae</i> DSM 29288 <sup>T</sup>            | 0  |   |      |                |
|                        | <i>R. borbori</i> LMG 23925 <sup>T</sup>          | 0  |   |      |                |
|                        | <i>R. calliandrae</i> CIP 110456 <sup>T</sup>     | 0  |   |      |                |
|                        | <i>R. capsici</i> JCM 19535 <sup>T</sup>          | 0  |   |      |                |
|                        | <i>R. cauense</i> LMG 26832 <sup>T</sup>          | 0  |   |      |                |
|                        | <i>R. cellulosityticum</i> DSM 18291 <sup>T</sup> | 0  |   |      |                |
|                        | <i>R. cnuense</i>                                 | 0  |   |      |                |
|                        | <i>R. daejeonense</i> NBRC 102495 <sup>T</sup>    | 0  |   |      |                |
|                        | <i>R. ecuadorensense</i> CNPSO 671 <sup>T</sup>   | 1  | - | +    | LFIO01000958.1 |
|                        | <i>R. endolithicum</i> KCTC 32077 <sup>T</sup>    | 0  |   |      |                |
|                        | <i>R. endophyticum</i> LMG 26002 <sup>T</sup>     | 0  |   |      |                |
|                        | <i>R. esperanzae</i> CNPSO 668 <sup>T</sup>       | 1  | - | +    | MXPU01000010.1 |
|                        | <i>R. etli</i> CFN 42 <sup>T</sup>                | 11 | - | +    | CP000133.1     |
|                        | <i>R. fabae</i> LMG 23997 <sup>T</sup>            | 0  |   |      |                |
|                        | <i>R. favelukesii</i> LPU83 <sup>T</sup>          | 2  | - | +    | HG916852.1     |
|                        | <i>R. flavum</i> YW14 <sup>T</sup>                | 1  | - | +    | MUXO01000046.1 |
|                        | <i>R. freirei</i> PRF 81 <sup>T</sup>             | 1  | - | +    | AQHN01000053.1 |
|                        | <i>R. gallicum</i> R602 <sup>T</sup>              | 3  | - | +    | CP006877.1     |
|                        | <i>R. gei</i> LMG 27603 <sup>T</sup>              | 0  |   |      |                |
|                        | <i>R. giardinii</i> H152 <sup>T</sup>             | 1  | - | +    | KB902578.1     |
|                        | <i>R. grahamii</i> CCGE 502 <sup>T</sup>          | 1  | - | +    | AEYE02000004.1 |
|                        | <i>R. hainanense</i> CCBAU 57015 <sup>T</sup>     | 1  | - | +    | FMAC01000008.1 |
|                        | <i>R. halophytocola</i> DSM 21600 <sup>T</sup>    | 0  |   |      |                |
|                        | <i>R. halotolerans</i> JCM 17536 <sup>T</sup>     | 0  |   |      |                |
|                        | <i>R. helanshanense</i> HAMBI 3083 <sup>T</sup>   | 0  |   |      |                |
|                        | <i>R. helianthi</i> KCTC 23879 <sup>T</sup>       | 0  |   |      |                |
|                        | <i>R. herbae</i> LMG 25718 <sup>T</sup>           | 0  |   |      |                |
|                        | <i>R. indigoferae</i> NBRC 100398 <sup>T</sup>    | 0  |   |      |                |

|                                                       |    |   |   |  |                |
|-------------------------------------------------------|----|---|---|--|----------------|
| <i>R. ipomoeae</i> LMG 27163 <sup>T</sup>             | 0  |   |   |  |                |
| <i>R. jaguaris</i> CIP 110453 <sup>T</sup>            | 0  |   |   |  |                |
| <i>R. kunmingense</i> KCTC 22609 <sup>T</sup>         | 0  |   |   |  |                |
| <i>R. laguerreae</i> FB206 <sup>T</sup>               | 1  | - | + |  | MRDM01000010.1 |
| <i>R. leguminosarum</i> WSM1689                       | 42 | - | + |  | CP007045.1     |
| <i>R. lemnae</i> NBRC 109339 <sup>T</sup>             | 0  |   |   |  |                |
| <i>R. lentis</i> DSM 29286 <sup>T</sup>               | 0  |   |   |  |                |
| <i>R. leucaenae</i> USDA 9039 <sup>T</sup>            | 2  | - | + |  | AUFB01000003.1 |
| <i>R. loessense</i> CGMCC 1.3401                      | 1  | - | + |  | FMTM01000001.1 |
| <i>R. lusitanum</i> P1-7 <sup>T</sup>                 | 1  | - | + |  | FMAF01000013.1 |
| <i>R. marinum</i> MGL06 <sup>T</sup>                  | 1  | - | + |  | JMQK01000002.1 |
| <i>R. mayense</i> CIP 110454 <sup>T</sup>             | 0  |   |   |  |                |
| <i>R. mesoamericanum</i> STM3625                      | 2  | - | + |  | HF536772.1     |
| <i>R. mesosinicum</i> LMG 24135 <sup>T</sup>          | 0  |   |   |  |                |
| <i>R. metallidurans</i> DSM 26575 <sup>T</sup>        | 0  |   |   |  |                |
| <i>R. miluonense</i> HAMB1 2971 <sup>T</sup>          | 1  | - | + |  | FMAH01000020.1 |
| <i>R. mongolense</i> USDA 1844 <sup>T</sup>           | 1  | - | + |  | ATTQ01000014.1 |
| <i>R. multihospitium</i> HAMB1 2975 <sup>T</sup>      | 1  | - | + |  | FMAG01000002.1 |
| <i>R. naphthalenivorans</i> NBRC 107585 <sup>T</sup>  | 0  |   |   |  |                |
| <i>R. nepotum</i> 37/9 <sup>T</sup>                   | 1  | - | + |  | JWJH01000014.1 |
| <i>R. oryzae</i> CGMCC 1.7048 <sup>T</sup>            | 3  | - | + |  | FOAM01000013.1 |
| <i>R. oryzicola</i> KCTC 32088 <sup>T</sup>           | 0  |   |   |  |                |
| <i>R. oryzae</i> N19 <sup>T</sup>                     | 1  | - | + |  | MKIM01000024.1 |
| <i>R. pakistanense</i> LMG 27895 <sup>T</sup>         | 0  |   |   |  |                |
| <i>R. paknamense</i> NBRC 109338 <sup>T</sup>         | 0  |   |   |  |                |
| <i>R. paranaense</i> LMG 27577 <sup>T</sup>           | 0  |   |   |  |                |
| <i>R. petrolearium</i> DSM 21882 <sup>T</sup>         | 0  |   |   |  |                |
| <i>R. phaseoli</i> N261                               | 16 | - | + |  | CP013580.1     |
| <i>R. pisi</i> DSM 30132 <sup>T</sup>                 | 0  |   |   |  |                |
| <i>R. pongamiae</i>                                   | 0  |   |   |  |                |
| <i>R. populi</i> JCM 19159 <sup>T</sup>               | 0  |   |   |  |                |
| <i>R. pseudoryzae</i> KCTC 23294 <sup>T</sup>         | 0  |   |   |  |                |
| <i>R. puerariae</i> NBRC 110722 <sup>T</sup>          | 0  |   |   |  |                |
| <i>R. pusense</i> LMG 25623 <sup>T</sup>              | 4  | - | + |  | FNBB01000001.1 |
| <i>R. qilianshanense</i> JCM 18337 <sup>T</sup>       | 0  |   |   |  |                |
| <i>R. rhizoryzae</i> KCTC 23652 <sup>T</sup>          | 0  |   |   |  |                |
| <i>R. rhizosphaerae</i> MH17 <sup>T</sup>             | 2  | - | + |  | MKIO01000030.1 |
| <i>R. rosettiformans</i> MTCC 9454 <sup>T</sup>       | 0  |   |   |  |                |
| <i>R. selenitireducens</i> ATCC BAA-1503 <sup>T</sup> | 1  | - | + |  | KI912495.1     |
| <i>R. skierniewicense</i> LMG 26191 <sup>T</sup>      | 0  |   |   |  |                |
| <i>R. smilacinae</i> LMG 27604 <sup>T</sup>           | 0  |   |   |  |                |
| <i>R. soli</i> JCM 14591 <sup>T</sup>                 | 0  |   |   |  |                |
| <i>R. sophorae</i> CCBau 03386 <sup>T</sup>           | 1  | - | + |  | MRDK01000043.1 |
| <i>R. sophoriradicis</i> LMG 27898 <sup>T</sup>       | 0  |   |   |  |                |
| <i>R. sphaerophysae</i> ACCC 17498 <sup>T</sup>       | 0  |   |   |  |                |
| <i>R. straminoryzae</i> JCM 19536 <sup>T</sup>        | 0  |   |   |  |                |
| <i>R. subbaraonis</i> DSM 24765 <sup>T</sup>          | 0  |   |   |  |                |
| <i>R. sullae</i> WSM1592 <sup>T</sup>                 | 2  | - | + |  | ATZB01000008.1 |
| <i>R. taeianense</i>                                  | 0  |   |   |  |                |
| <i>R. taibaishanense</i> ACCC 14971 <sup>T</sup>      | 1  | - | + |  | MKIN01000016.1 |
| <i>R. tarimense</i> CCTCC AB 2011011 <sup>T</sup>     | 0  |   |   |  |                |
| <i>R. tibeticum</i> CGMCC 1.7071 <sup>T</sup>         | 2  | - | + |  | FOCV01000001.1 |
| <i>R. tropici</i> CIAT 899 <sup>T</sup>               | 5  | - | + |  | CP004015.1     |
| <i>R. tubonense</i> LMG 25225 <sup>T</sup>            | 0  |   |   |  |                |

|                          |                                                     |    |   |   |                 |
|--------------------------|-----------------------------------------------------|----|---|---|-----------------|
|                          | <i>R. undicola</i> ATCC 700741 <sup>T</sup>         | 1  | - | + | JHXQ01000003.1  |
|                          | <i>R. vallis</i> LMG 25295 <sup>T</sup>             | 0  |   |   |                 |
|                          | <i>R. vignae</i> CCBAU 05176 <sup>T</sup>           | 1  | - | + | JNNU01000014.1  |
|                          | <i>R. viscosum</i> DSM 7307 <sup>T</sup>            | 0  |   |   |                 |
|                          | <i>R. wenxiniae</i> DSM 100734 <sup>T</sup>         | 0  |   |   |                 |
|                          | <i>R. yanglingense</i> CCBAU 01603                  | 1  | - | + | JHUO01000002.1  |
|                          | <i>R. yantingense</i> LMG 28229 <sup>T</sup>        | 0  |   |   |                 |
|                          | <i>R. zeae</i> LMG 29735 <sup>T</sup>               | 0  |   |   |                 |
| <i>Shinella</i>          | <i>S. daejeonensis</i> JCM 16236 <sup>T</sup>       | 0  |   |   |                 |
|                          | <i>S. fusca</i> LMG 24714 <sup>T</sup>              | 0  |   |   |                 |
|                          | <i>S. granuli</i> JCM 13254 <sup>T</sup>            | 0  |   |   |                 |
|                          | <i>S. kummerowiae</i> LMG 24136 <sup>T</sup>        | 0  |   |   |                 |
|                          | <i>S. yambaruensis</i> DSM 18801 <sup>T</sup>       | 0  |   |   |                 |
|                          | <i>S. zoogloeoides</i> ATCC 19623 <sup>T</sup>      | 0  |   |   |                 |
| <i>Ensifer</i>           | <i>E. adhaerens</i> OV14                            | 6  | - | + | CP007236.1      |
|                          | <i>E. aridi</i> TW10                                | 6  | - | + | AZNX01000001.1  |
|                          | <i>E. garamanticus</i> LMG 24692 <sup>T</sup>       | 0  |   |   |                 |
|                          | <i>E. glycinis</i> CCBAU 23380 <sup>T</sup>         | 1  | - | + | LPUX01000053.1  |
|                          | <i>E. maghrebium</i>                                | 0  |   |   |                 |
|                          | <i>E. mexicanus</i> DSM 18446 <sup>T</sup>          | 0  |   |   |                 |
|                          | <i>E. numidicus</i> LMG 24690 <sup>T</sup>          | 0  |   |   |                 |
|                          | <i>E. psoraleae</i> LMG 26835 <sup>T</sup>          | 0  |   |   |                 |
|                          | <i>E. sesbaniae</i> LMG 26833 <sup>T</sup>          | 0  |   |   |                 |
|                          | <i>E. shofinae</i> CCBAU 251167 <sup>T</sup>        | 1  | - | + | MBFK01000100.1  |
|                          | <i>E. sojae</i> CCBAU 05684 <sup>T</sup>            | 2  | - | + | CP023067.1      |
|                          | <i>E. xericitae</i>                                 | 0  |   |   |                 |
| <i>Sinorhizobium</i>     | <i>S. abri</i>                                      | 0  |   |   |                 |
|                          | <i>S. americanum</i> CCGM7                          | 3  | - | + | CP013051.1      |
|                          | <i>S. arboris</i> LMG 14919 <sup>T</sup>            | 1  | - | + | ATYB01000014.1  |
|                          | <i>S. chiapanecum</i> ITTG S70 <sup>T</sup>         | 0  |   |   |                 |
|                          | <i>S. fredii</i> CCBAU 83666 <sup>T</sup>           | 13 | - | + | CP023070.1      |
|                          | <i>S. idiaense</i>                                  | 0  |   |   |                 |
|                          | <i>S. kostiense</i> DSM 13372 <sup>T</sup>          | 0  |   |   |                 |
|                          | <i>S. kummerowiae</i> NBRC 100799 <sup>T</sup>      | 0  |   |   |                 |
|                          | <i>S. medicae</i> WSM419                            | 5  | - | + | CP000738.1      |
|                          | <i>S. meliloti</i> 1021                             | 46 | - | + | AL591688.1      |
|                          | <i>S. saheli</i> LMG 7837 <sup>T</sup>              | 1  | - | + | LNQB01000073.1  |
|                          | <i>S. terrangae</i> DSM 11282 <sup>T</sup>          | 0  |   |   |                 |
|                          | <i>S. xinjiangense</i> DSM 5852 <sup>T</sup>        | 0  |   |   |                 |
| <i>Roseiarcaceae</i>     | <i>Roseiarcus</i>                                   |    |   |   |                 |
|                          | <i>R. fermentans</i> DSM 24875 <sup>T</sup>         | 0  |   |   |                 |
| <i>Xanthobacteraceae</i> | <i>Ancylobacter</i>                                 |    |   |   |                 |
|                          | <i>A. abiegnus</i> Z-0056 <sup>T</sup>              | 0  |   |   |                 |
|                          | <i>A. aquaticus</i> DSM 101 <sup>T</sup>            | 0  |   |   |                 |
|                          | <i>A. defluvii</i> CCUG 63806 <sup>T</sup>          | 0  |   |   |                 |
|                          | <i>A. dichloromethanicus</i> DSM 21507 <sup>T</sup> | 0  |   |   |                 |
|                          | <i>A. oerskovii</i> DSM 18746 <sup>T</sup>          | 0  |   |   |                 |
|                          | <i>A. polymorphus</i> DSM 2457 <sup>T</sup>         | 0  |   |   |                 |
|                          | <i>A. pratisalsi</i> DSM 102029 <sup>T</sup>        | 0  |   |   |                 |
|                          | <i>A. rudongensis</i> CGMCC 1.1761                  | 1  | - | + | FMTTP01000009.1 |
|                          | <i>A. sunchi</i> JCM 32039 <sup>T</sup>             | 0  |   |   |                 |
|                          | <i>A. vacuolatus</i> DSM 1277 <sup>T</sup>          | 0  |   |   |                 |
| <i>Azorhizobium</i>      | <i>A. caulinodans</i> ORS 571 <sup>T</sup>          | 1  | - | + | NC_009937.1     |
|                          | <i>A. deobereineriae</i> UFLA1-100 <sup>T</sup>     | 1  | - | + | AXBA01000031.1  |
|                          | <i>A. oxalatophilum</i> DSM 18749 <sup>T</sup>      | 0  |   |   |                 |
| <i>Labrys</i>            | <i>L. gingengisoli</i>                              | 0  |   |   |                 |

|                                 |                                                                        |   |   |           |                                                     |
|---------------------------------|------------------------------------------------------------------------|---|---|-----------|-----------------------------------------------------|
|                                 | <i>L. methylaminiphilus</i> DSM 16812 <sup>T</sup>                     | 0 |   |           |                                                     |
|                                 | <i>L. miyagiensis</i> NBRC 101365 <sup>T</sup>                         | 0 |   |           |                                                     |
|                                 | <i>L. monachus</i> DSM 5896 <sup>T</sup>                               | 0 |   |           |                                                     |
|                                 | <i>L. neptuniae</i> LMG 23578 <sup>T</sup>                             | 0 |   |           |                                                     |
|                                 | <i>L. okinaawensis</i> DSM 18385 <sup>T</sup>                          | 0 |   |           |                                                     |
|                                 | <i>L. oportucalensis</i> DSM 17916 <sup>T</sup>                        | 0 |   |           |                                                     |
|                                 | <i>L. soli</i> JCM 19895 <sup>T</sup>                                  | 0 |   |           |                                                     |
|                                 | <i>L. wisconsinensis</i> DSM 19619 <sup>T</sup>                        | 0 |   |           |                                                     |
| <i>Pseudolabrys</i>             | <i>P. taiwanensis</i> CIP 108932 <sup>T</sup>                          | 0 |   |           |                                                     |
| <i>Pseudoxanthobacter</i>       | <i>P. liyangensis</i> KACC 16601 <sup>T</sup>                          | 0 |   |           |                                                     |
|                                 | <i>P. soli</i> DSM 19599 <sup>T</sup>                                  | 1 | - | +         | FRX001000002.1                                      |
| <i>Starkeya</i>                 | <i>S. koreensis</i> JCM 21669 <sup>T</sup>                             | 0 |   |           |                                                     |
|                                 | <i>S. novella</i> DSM 506 <sup>T</sup>                                 | 1 |   | n.m./n.d. | Kappler et al., 2012 (10.4056/sigs.3006378)         |
| <i>Xanthobacter</i>             | <i>X. agilis</i> DSM 3770 <sup>T</sup>                                 | 0 |   |           |                                                     |
|                                 | <i>X. aminoxidans</i> DSM 15009 <sup>T</sup>                           | 0 |   |           |                                                     |
|                                 | <i>X. autotrophicus</i> Py2 <sup>T</sup>                               | 1 |   | n.d.      |                                                     |
|                                 | <i>X. flavus</i> DSM 338 <sup>T</sup>                                  | 0 |   |           |                                                     |
|                                 | <i>X. polyaromaticivorans</i> 127W <sup>T</sup>                        | 0 |   |           |                                                     |
|                                 | <i>X. tagetidis</i> DSM 11105 <sup>T</sup>                             | 0 |   |           |                                                     |
|                                 | <i>X. viscosus</i> ATCC BAA-298 <sup>T</sup>                           | 0 |   |           |                                                     |
|                                 | <i>X. xylophilus</i>                                                   | 0 |   |           |                                                     |
| unclassified <i>Rhizobiales</i> | <i>Alsobacter</i> <i>A. metallidurans</i> NBRC 107718 <sup>T</sup>     | 0 |   |           |                                                     |
|                                 | <i>Bauldia</i> <i>B. consociata</i> CCM 7594 <sup>T</sup>              | 0 |   |           |                                                     |
|                                 | <i>B. litoralis</i> ATCC 35022 <sup>T</sup>                            | 1 |   | n.d.      |                                                     |
|                                 | <i>Endowatersipora</i> <sup>d</sup> <i>E. palomitas</i>                | 0 |   |           |                                                     |
|                                 | <i>E. rubus</i>                                                        | 0 |   |           |                                                     |
|                                 | <i>Hodgkinia</i> <sup>d</sup> <i>E. cicadicola</i> Dsem                | 5 |   | n.d.      |                                                     |
|                                 | <i>Tokpelaia</i> <sup>d</sup> <i>T. hoelldoblerii</i> Hsal             | 1 | - | +         | CP017315                                            |
|                                 | <i>Hartmannibacter</i> <i>H. diazotrophicus</i> LMG 27460 <sup>T</sup> | 0 |   |           |                                                     |
|                                 | <i>Methylobrevis</i> <i>M. pamukkalensis</i> PK2 <sup>T</sup>          | 1 | + | -         | MCRJ01000144.1                                      |
| <i>Methyloceanibacter</i>       | <i>M. caenitepidi</i> Gela4 <sup>T</sup>                               | 1 |   | n.m./n.d. | Takeuchi et al., 2014 (10.1099/ij.s.0.053397-0)     |
|                                 | <i>M. marginalis</i> R-67177 <sup>T</sup>                              | 1 |   | n.d.      |                                                     |
|                                 | <i>M. methanicus</i> R-67174 <sup>T</sup>                              | 1 |   | n.d.      |                                                     |
|                                 | <i>M. stevinii</i> R-67176 <sup>T</sup>                                | 1 |   | n.d.      |                                                     |
|                                 | <i>M. superfactus</i> R-67175 <sup>T</sup>                             | 1 |   | n.d.      |                                                     |
| <i>Methyloligella</i>           | <i>M. halotolerans</i> VKM B-2706 <sup>T</sup>                         | 1 |   | n.m./n.d. | Doroniva et al., 2013 (10.1016/j.syapm.2012.12.001) |
|                                 | <i>M. solikamskensis</i> DSM 25212 <sup>T</sup>                        | 0 |   |           |                                                     |
|                                 | <i>Methylosulfonomonas</i> <i>M. methylovora</i>                       | 0 |   |           |                                                     |
|                                 | <i>Nordella</i> <i>N. oligomobilis</i> CIP 106862 <sup>T</sup>         | 0 |   |           |                                                     |
|                                 | <i>Pseudorhodoplanes</i> <i>P. sinuspersici</i> RIPI 110 <sup>T</sup>  | 1 | + | -         | CP021112                                            |
|                                 | <i>Qingshengfania</i> <i>Q. soli</i> KCTC 42463 <sup>T</sup>           | 0 |   |           |                                                     |
| <i>Reichenowia</i>              | <i>R. ornatae</i>                                                      | 0 |   |           |                                                     |
|                                 | <i>R. parasiticae</i>                                                  | 0 |   |           |                                                     |
|                                 | <i>R. pictae</i>                                                       | 0 |   |           |                                                     |
| <i>Solomonas</i>                | <i>S. fluorantheni</i>                                                 | 0 |   |           |                                                     |

Taxonomy according to NCBI taxonomy database, accessed in October 2017. Species with no sequenced genome are highlighted in red typing. Genomes harboring both, the subpolar and lateral flagellar systems are highlighted in bold. <sup>T</sup> indicates type strain.

<sup>a</sup>Only sequenced genomes of type strains and/or high-quality genomes are considered. Unclassified isolates and candidatus species are not considered.

<sup>b</sup>Reviewed in October, 2017 from the NCBI genome database

<sup>c</sup>Genome downloaded from the JGI IMG.

<sup>d</sup>*Candidatus* genera.

n.d. Genes for flagellar systems not detected in genome annotations.

n.m. Non-motile bacteria.
