# Supplementary material for: Phylogenomic Analyses of Bradyrhizobium Reveal Uneven Distribution of the Lateral and Subpolar Flagellar Systems, Which Extends to Rhizobiales
Source: MDPI journal article supplement (doi:10.3390/microorganisms7020050), 2019-02-13
Supplement: s1 [file s1]

**Supplementary Table S1.** General genomic features of genomes used in this study.

| Name                                                      | Assembly NCBI<br>ID<br>/ IMG Genome ID | RefSeq<br>Ascc. No.            | Scaffolds | Size<br>(Mb) | GC<br>(%) | Genes | Proteins |
|-----------------------------------------------------------|----------------------------------------|--------------------------------|-----------|--------------|-----------|-------|----------|
| <i>Afipia birgiae</i> 34632 <sup>T</sup>                  | GCA_000308295.2                        | CAJQ02                         | 65        | 5.33         | 60.8      | 5166  | 4871     |
| <i>Afipia broomeae</i> ATCC 49717 <sup>T</sup>            | GCA_000314675.2                        | AGWX01                         | 4         | 5.26         | 61.3      | 5086  | 4953     |
| <i>Afipia clevelandensis</i> ATCC 49720 <sup>T</sup>      | GCA_000336555.1                        | AGWY01                         | 19        | 4.4          | 61.7      | 4248  | 4151     |
| <i>Agrobacterium fabrum</i> C58 <sup>T</sup>              | GCA_000092025.1                        | NC_003062.2<br>NC_003063.2     | -         | 5.67         | 59.1      | 5459  | 5355     |
| <i>Agrobacterium</i> sp. H13-3                            | GCA_000192635.1                        | NC_015183.1<br>NC_015508.1     | -         | 5.57         | 58.5      | 5365  | 5154     |
| <i>Agrobacterium tumefaciens</i> Ach5                     | GCA_000971565.1                        | NZ_CP011246.1<br>NZ_CP011247.1 | -         | 5.67         | 58.5      | 5404  | 5184     |
| <i>Agrobacterium tumefaciens</i> ATCC 31700               | GCA_001975795.1                        | MTKI01                         | 117       | 5.94         | 58.4      | 5709  | 5462     |
| <i>Aminobacter aminovorans</i> KCTC 2477                  | GCA_001605015.1                        | NZ_CP015005.1                  | -         | 5.62         | 63.4      | 5542  | 5362     |
| <i>Aquamicrobium aerolatum</i> DSM 21857 <sup>T</sup>     | GCA_900113935.1                        | FORF01                         | 50        | 3.64         | 60.1      | 3573  | 3513     |
| <i>Aquamicrobium defluvii</i> W13Z1                       | GCA_000585625.1                        | JENY01                         | 65        | 4.77         | 63.1      | 4703  | 4455     |
| <i>Aurantimonas coralicida</i> DSM 14790 <sup>T</sup>     | GCA_000421645.1                        | ATXK01                         | 38        | 4.62         | 66.7      | 4359  | 4198     |
| <i>Aurantimonas manganooxydans</i> DSM 21871 <sup>T</sup> | GCA_001463865.1                        | BBWP01                         | 94        | 4.25         | 66.8      | 3944  | 3821     |
| <i>Aureimonas altamirensis</i> DSM 21988 <sup>T</sup>     | GCA_900141975.1                        | FQZC01                         | 11        | 4.19         | 64.8      | 3983  | 3894     |
| <i>Aureimonas frigidaquae</i> JCM 14755 <sup>T</sup>      | GCA_001463905.1                        | BBWR01                         | 30        | 4.10         | 66.1      | 3864  | 3774     |
| <i>Aureimonas jatrophae</i> DSM 25025 <sup>T</sup>        | GCA_900104035.1                        | FNIT01                         | 27        | 4.59         | 67.8      | 4360  | 4304     |
| <i>Aureimonas phyllosphaerae</i> DSM 25026 <sup>T</sup>   | GCA_900113065.1                        | FOOA01                         | 62        | 4.72         | 67.5      | 4538  | 4479     |
| <i>Aureimonas ureilytica</i> DSM 18598 <sup>T</sup>       | GCA_000382705.1                        | ARQE01                         | 44        | 5.09         | 67.3      | 4792  | 4637     |
| <i>Bartonella ancashensis</i> 20.00 <sup>T</sup>          | GCA_001281405.1                        | NZ_CP010401.1                  | -         | 1.47         | 38.4      | 1317  | 1203     |
| <i>Bartonella bacilliformis</i> ATCC 35685 <sup>T</sup>   | GCA_001559035.1                        | NZ_CP014012.1                  | -         | 1.44         | 38.2      | 1284  | 1183     |
| <i>Bartonella bovis</i> 91-4 <sup>T</sup>                 | GCA_000384965.1                        | NZ_CM001844.1                  | 1         | 1.63         | 37.4      | 2809  | 2627     |
| <i>Bartonella clarridgeiae</i> ATCC 51734 <sup>T</sup>    | GCA_000518185.1                        | JADC01                         | 17        | 1.49         | 35.7      | 1275  | 1170     |
| <i>Bartonella schoenbuchensis</i> R1 <sup>T</sup>         | GCA_002022685.1                        | NZ_CP019789.1                  | 2         | 1.73         | 37.8      | 1587  | 1330     |
| <i>Beijerinckia indica</i> ATCC 9039 <sup>T</sup>         | GCA_000019845.1                        | NC_010581.1                    | -         | 4.17         | 57.1      | 3767  | 3619     |
| <i>Beijerinckia mobilis</i> UQM 1969 <sup>T</sup>         | GCA_000745425.1                        | JQJH01                         | 58        | 4.32         | 57.2      | -     | 3680     |
| <i>Blastochloris viridis</i> ATCC 19567                   | GCA_001402875.1                        | NZ_CP012946.1                  | -         | 3.72         | 67.9      | 3265  | 3157     |
| <i>Blastochloris viridis</i> DSM 133 <sup>T</sup>         | GCA_001548155.2                        | NZ_AP014854.2                  | -         | 3.73         | 67.9      | 3260  | 3149     |
| <i>Bosea robiniae</i> DSM 26672 <sup>T</sup>              | GCA_900102525.1                        | FNBZ01                         | 21        | 5.28         | 66.3      | 5067  | 5006     |
| <i>Bosea vaviloviae</i> Vaf-18 <sup>T</sup>               | GCA_001741865.1                        | NZ_CP017147.1                  | -         | 6.71         | 65.4      | 6271  | 6105     |
| <i>Bradyrhizobium arachidis</i> LMG 26795                 | GCA_900116675.1                        | FPBQ01                         | 98        | 9.79         | 63.6      | 9374  | 9312     |

|                                                                   |                 |            |      |      |      |       |      |
|-------------------------------------------------------------------|-----------------|------------|------|------|------|-------|------|
| <i>Bradyrhizobium canariense</i> GAS369                           | GCA_900105125.1 | LT629750.1 | -    | 7.84 | 60.9 | 7549  | 7291 |
| <i>Bradyrhizobium daqingense</i> CGMCC 1.10947 <sup>a</sup>       | 2596583556      | -          | 107  | 7.89 | 63.7 | 7559  | 7480 |
| <i>Bradyrhizobium diazoefficiens</i> NK6                          | GCA_001549695.1 | AP014685.1 | -    | 10.5 | 63.6 | 10249 | 8598 |
| <i>Bradyrhizobium diazoefficiens</i> SEMIA 5080                   | GCA_000648595.2 | ADOU02     | 13   | 9.09 | 64.0 | 8726  | 8252 |
| <i>Bradyrhizobium diazoefficiens</i> USDA 110                     | GCA_000011365.1 | BA000040.2 | -    | 9.11 | 64.1 | 8373  | 8317 |
| <i>Bradyrhizobium diazoefficiens</i> USDA 122                     | GCA_000473025.1 | AXAX01     | 101  | 8.98 | 64.0 | 8673  | 8184 |
| <i>Bradyrhizobium elkanii</i> 587                                 | GCA_000257685.2 | AJJK01     | 2430 | 8.67 | 63.6 | -     | -    |
| <i>Bradyrhizobium elkanii</i> BLY3-8                              | GCA_001718205.1 | LWUI01     | 90   | 9.20 | 63.8 | 8553  | 8143 |
| <i>Bradyrhizobium elkanii</i> BLY6-1                              | GCA_001718185.1 | LXEM01     | 79   | 9.20 | 63.8 | 8549  | 8148 |
| <i>Bradyrhizobium elkanii</i> CCBAU 05737                         | GCA_000261505.1 | AJPV01     | 751  | 9.77 | 63.5 | 9578  | 8527 |
| <i>Bradyrhizobium elkanii</i> CCBAU 43297                         | GCA_000261525.1 | AJPW01     | 654  | 9.35 | 63.7 | 9092  | 8193 |
| <i>Bradyrhizobium elkanii</i> UASWS1015                           | GCA_000878305.1 | JXOF01     | 187  | 7.82 | 64.6 | 7306  | 7077 |
| <i>Bradyrhizobium elkanii</i> USDA 3254                           | GCA_000472765.1 | AXAH01     | 85   | 8.98 | 63.8 | 8497  | 7977 |
| <i>Bradyrhizobium elkanii</i> USDA 3259                           | GCA_000473005.1 | AXAW01     | 101  | 8.72 | 63.9 | 8264  | 7782 |
| <i>Bradyrhizobium elkanii</i> USDA 76                             | GCA_000379145.1 | ARAG01     | 2    | 9.49 | 63.7 | 8969  | 8534 |
| <i>Bradyrhizobium elkanii</i> USDA 94                             | GCA_000519225.1 | JAF01      | 164  | 9.56 | 63.7 | 9038  | 8504 |
| <i>Bradyrhizobium elkanii</i> WSM1741                             | GCA_000472965.1 | AXAU01     | 69   | 7.95 | 62.1 | 7520  | 7116 |
| <i>Bradyrhizobium elkanii</i> WSM2783                             | GCA_000472865.1 | AXAP01     | 217  | 9.90 | 62.4 | 9510  | 8824 |
| <i>Bradyrhizobium embrapense</i> SEMIA 6208                       | GCA_001189235.2 | LFIP02     | 36   | 8.27 | 64.0 | 7729  | 7404 |
| <i>Bradyrhizobium erythrophlei</i> GAS138                         | GCA_900129425.1 | LT670817.1 | -    | 9.09 | 61.4 | 8638  | 8280 |
| <i>Bradyrhizobium erythrophlei</i> GAS242                         | GCA_900129505.1 | LT670818.1 | -    | 9.19 | 61.9 | 8690  | 8320 |
| <i>Bradyrhizobium erythrophlei</i> GAS401                         | GCA_900142985.1 | LT670849.1 | -    | 7.53 | 61.2 | 7214  | 7027 |
| <i>Bradyrhizobium erythrophlei</i> MT12                           | GCA_900105845.1 | FNTH01     | 2    | 8.97 | 63.8 | 8417  | 8054 |
| <i>Bradyrhizobium huanghuaihaiense</i> CGMCC 1.10948 <sup>a</sup> | 2596583587      | -          | 101  | 9.23 | 63.9 | 8760  | 8654 |
| <i>Bradyrhizobium icense</i> LMTR 13                              | GCA_001693385.1 | CP016428.1 | -    | 8.32 | 62.0 | 7868  | 7456 |
| <i>Bradyrhizobium japonicum</i> 22                                | GCA_000482425.1 | AXVG01     | 4    | 7.51 | 64.5 | 7121  | 6860 |
| <i>Bradyrhizobium japonicum</i> CCBAU 15354                       | GCA_000261545.1 | AJPX01     | 951  | 10.1 | 63.3 | 10250 | 8898 |
| <i>Bradyrhizobium japonicum</i> CCBAU 15517                       | GCA_000261565.1 | AJPY01     | 1129 | 9.92 | 63.4 | 10050 | 8694 |
| <i>Bradyrhizobium japonicum</i> CCBAU 15618                       | GCA_000261585.1 | AJPZ01     | 691  | 9.82 | 63.4 | 9846  | 8828 |
| <i>Bradyrhizobium japonicum</i> CCBAU 25435                       | GCA_000261605.1 | AJQA01     | 520  | 9.46 | 63.5 | 9292  | 8475 |
| <i>Bradyrhizobium japonicum</i> CCBAU 83623                       | GCA_000261625.1 | AJQB01     | 1212 | 10.1 | 63.3 | 10277 | 8854 |
| <i>Bradyrhizobium japonicum</i> E109                              | GCA_000807315.1 | CP010313.1 | -    | 9.22 | 63.7 | 8741  | 8404 |
| <i>Bradyrhizobium japonicum</i> FN1                               | GCA_001038185.1 | JGCL01     | 87   | 9.14 | 63.7 | 8664  | 8320 |
| <i>Bradyrhizobium japonicum</i> in8p8                             | GCA_000426845.1 | AUGD01     | 52   | 7.59 | 63.8 | 7270  | 6947 |
| <i>Bradyrhizobium japonicum</i> Is-1                              | GCA_001280585.1 | LGUJ01     | 104  | 8.98 | 64.0 | 8656  | 8201 |
| <i>Bradyrhizobium japonicum</i> Is-34                             | GCA_000773865.1 | JRPN01     | 248  | 10.3 | 63.0 | 9921  | 9376 |
| <i>Bradyrhizobium japonicum</i> is5                               | GCA_000421305.1 | ATWP01     | 60   | 7.59 | 63.8 | 7257  | 6929 |
| <i>Bradyrhizobium japonicum</i> SEMIA 5079                        | GCA_000661935.1 | CP007569.1 | -    | 9.58 | 63.5 | 9143  | 8675 |

|                                                |                 |            |      |      |      |       |      |
|------------------------------------------------|-----------------|------------|------|------|------|-------|------|
| <i>Bradyrhizobium japonicum</i> USDA 123       | GCA_000482525.1 | AXVP01     | 517  | 10.6 | 63.3 | 10272 | 9181 |
| <i>Bradyrhizobium japonicum</i> USDA 124       | GCA_000374205.1 | ARFJ01     | 123  | 9.00 | 64.0 | 8593  | 8182 |
| <i>Bradyrhizobium japonicum</i> USDA 135       | GCA_000472945.1 | AXAT01     | 547  | 7.70 | 64.0 | 7662  | 6704 |
| <i>Bradyrhizobium japonicum</i> USDA 38        | GCA_000472745.1 | AXAG01     | 107  | 9.61 | 63.5 | 9225  | 8760 |
| <i>Bradyrhizobium japonicum</i> USDA 4         | GCA_000472725.1 | AXAF01     | 97   | 8.74 | 63.7 | 8235  | 7778 |
| <i>Bradyrhizobium japonicum</i> USDA 6         | GCA_000472985.1 | AXAV01     | 87   | 9.13 | 63.7 | 8715  | 8321 |
| <i>Bradyrhizobium jicamae</i> PAC68            | GCA_001440395.1 | LLXZ01     | 235  | 8.74 | 62.2 | 8277  | 7745 |
| <i>Bradyrhizobium lablabi</i> GAS522           | GCA_900104755.1 | FNTI01     | 2    | 8.27 | 62.3 | 7822  | 7504 |
| <i>Bradyrhizobium liaoningense</i> CCBAU 05525 | GCA_000261645.1 | AJQC01     | 1040 | 8.16 | 63.8 | 8111  | 6957 |
| <i>Bradyrhizobium liaoningense</i> CCBAU 83689 | GCA_000261665.1 | AJQD01     | 1133 | 8.01 | 63.8 | 7966  | 6843 |
| <i>Bradyrhizobium liaoningense</i> CCNWSX0360  | GCA_001595995.1 | LUKO01     | 242  | 8.59 | 63.7 | 8155  | 7651 |
| <i>Bradyrhizobium manausense</i> BR3351        | GCA_001440035.1 | LJYG01     | 127  | 9.15 | 62.8 | 8404  | 7794 |
| <i>Bradyrhizobium neotropale</i> BR 10247      | GCA_001641695.1 | LSEF01     | 125  | 8.68 | 63.6 | 7989  | 7682 |
| <i>Bradyrhizobium oligotrophicum</i> S58       | GCA_000344805.1 | AP012603.1 | -    | 8.26 | 65.1 | 7291  | 7061 |
| <i>Bradyrhizobium ottawaense</i> GAS524        | GCA_900099825.1 | LT629693.1 | -    | 8.34 | 62.3 | 7956  | 7624 |
| <i>Bradyrhizobium pachyrhizi</i> BR3262        | GCA_001440015.1 | LJYE01     | 116  | 8.97 | 63.7 | 8290  | 7621 |
| <i>Bradyrhizobium pachyrhizi</i> PAC 48        | GCA_001189245.1 | LFIQ019.09 | 124  | 8.71 | 63.8 | 8096  | 7479 |
| <i>Bradyrhizobium paxllaeri</i> LMTR 21        | GCA_001693515.1 | MAXB01     | 146  | 8.29 | 62.5 | 7713  | 7430 |
| <i>Bradyrhizobium retamae</i> Ro19             | GCA_001440415.1 | LLYA01     | 235  | 8.47 | 61.9 | 7995  | 7481 |
| <i>Bradyrhizobium</i> sp. 17-4                 | GCA_001312945.1 | BBEX01     | 2463 | 7.11 | 64.5 | -     | -    |
| <i>Bradyrhizobium</i> sp. Ai1a-2               | GCA_000426245.1 | AUEZ01     | 246  | 9.03 | 62.6 | 8411  | 7810 |
| <i>Bradyrhizobium</i> sp. ARR65                | GCA_000472385.1 | AWZU01     | 139  | 8.61 | 62.0 | 8126  | 7603 |
| <i>Bradyrhizobium</i> sp. AT1                  | GCA_001590795.1 | JXDL01     | 8    | 7.54 | 64.2 | 7029  | 6673 |
| <i>Bradyrhizobium</i> sp. BF49 <sup>a</sup>    | 2751185896      | -          | 1    | 7.55 | 63.8 | 7398  | 7328 |
| <i>Bradyrhizobium</i> sp. BR 10245             | GCA_001641635.1 | LUUB01     | 133  | 10.1 | 63.2 | 9486  | 8827 |
| <i>Bradyrhizobium</i> sp. BR 10303             | GCA_001542415.1 | LNCU01     | 137  | 8.72 | 63.2 | 8162  | 7593 |
| <i>Bradyrhizobium</i> sp. BTAi1                | GCA_000015165.1 | CP000494.1 | -    | 8.49 | 64.8 | 7716  | 7496 |
| <i>Bradyrhizobium</i> sp. CCBAU 15544          | GCA_000261705.1 | AJQF01     | 612  | 8.48 | 63.7 | 8340  | 7529 |
| <i>Bradyrhizobium</i> sp. CCBAU 15615          | GCA_000261725.1 | AJQG01     | 453  | 8.85 | 63.7 | 8600  | 7815 |
| <i>Bradyrhizobium</i> sp. CCBAU 15635          | GCA_000261745.1 | AJQH01     | 456  | 8.29 | 63.8 | 8091  | 7410 |
| <i>Bradyrhizobium</i> sp. CCBAU 41267          | GCA_000261765.1 | AJQI01     | 563  | 9.12 | 64.0 | 9076  | 8388 |
| <i>Bradyrhizobium</i> sp. CCBAU 43298          | GCA_000261685.1 | AJQE01     | 508  | 7.92 | 63.9 | 7836  | 7123 |
| <i>Bradyrhizobium</i> sp. CCGE-LA001           | GCA_000296215.2 | CP013949.1 | -    | 7.83 | 63.6 | 7234  | 6988 |
| <i>Bradyrhizobium</i> sp. CCH10-C7             | GCA_001556255.1 | LSIN01     | 366  | 5.59 | 60.7 | 5487  | 5116 |
| <i>Bradyrhizobium</i> sp. CCH4-A6              | GCA_001556245.1 | LSIM01     | 249  | 5.30 | 60.9 | 5151  | 4852 |
| <i>Bradyrhizobium</i> sp. CCH5-F6              | GCA_001556045.1 | LSIC01     | 222  | 8.16 | 64.1 | 7720  | 7383 |
| <i>Bradyrhizobium</i> sp. CF659                | GCA_900113725.1 | FOQJ01     | 25   | 8.47 | 64.5 | 7968  | 7608 |
| <i>Bradyrhizobium</i> sp. Cp5.3                | GCA_000426265.1 | AUFA01     | 148  | 8.92 | 63.4 | 8486  | 8000 |

|                                     |                 |            |     |      |      |      |      |
|-------------------------------------|-----------------|------------|-----|------|------|------|------|
| <i>Bradyrhizobium</i> sp. DFCI-1    | GCA_000465325.1 | AMFB01     | 89  | 7.65 | 64.4 | 7164 | 7112 |
| <i>Bradyrhizobium</i> sp. DOA1      | GCA_001593325.1 | JXJM01     | 4   | 7.54 | 63.6 | 7085 | 6648 |
| <i>Bradyrhizobium</i> sp. DOA9      | GCA_000617845.2 | BAWE01     | 2   | 7.85 | 64.5 | 7364 | 7109 |
| <i>Bradyrhizobium</i> sp. Ec3.3     | GCA_000472925.1 | AXAS01     | 154 | 10.0 | 62.6 | 9477 | 8845 |
| <i>Bradyrhizobium</i> sp. ERR11     | GCA_900094605.1 | FMAI01     | 102 | 9.16 | 63.2 | 8688 | 8037 |
| <i>Bradyrhizobium</i> sp. G22       | GCA_900011265.1 | CZWJ01     | 20  | 9.09 | 63.7 | 8606 | 8188 |
| <i>Bradyrhizobium</i> sp. Gha       | GCA_900113735.1 | FOQM01     | 95  | 8.25 | 62.9 | 7934 | 7318 |
| <i>Bradyrhizobium</i> sp. Ghvi      | GCA_900115265.1 | FOVU01     | 41  | 7.93 | 63.0 | 7536 | 7137 |
| <i>Bradyrhizobium</i> sp. Leaf396   | GCA_001424605.1 | LMQJ01     | 66  | 7.71 | 63.8 | 7324 | 7020 |
| <i>Bradyrhizobium</i> sp. LMTR 3    | GCA_001693485.1 | MAXC01     | 55  | 7.84 | 62.3 | 7328 | 7024 |
| <i>Bradyrhizobium</i> sp. LTSP849   | GCA_000938255.1 | JYMR01     | 57  | 8.57 | 63.2 | 8063 | 7841 |
| <i>Bradyrhizobium</i> sp. LTSP857   | GCA_000938285.1 | JYMS01     | 50  | 8.43 | 63.3 | 7947 | 7719 |
| <i>Bradyrhizobium</i> sp. LTSP885   | GCA_000938305.1 | JYMT01     | 43  | 7.85 | 63.4 | 7295 | 7143 |
| <i>Bradyrhizobium</i> sp. LTSPM299  | GCA_000938235.1 | JYMU01     | 100 | 9.09 | 62.8 | 8488 | 8171 |
| <i>Bradyrhizobium</i> sp. OHSU III  | GCA_000497675.1 | APJD01     | 82  | 7.94 | 64.7 | 7417 | 7217 |
| <i>Bradyrhizobium</i> sp. OK095     | GCA_900109945.1 | FOBX01     | 51  | 7.85 | 63.9 | 7417 | 7204 |
| <i>Bradyrhizobium</i> sp. ORS 278   | GCA_000026145.1 | CU234118.1 | -   | 7.46 | 65.5 | 6788 | 6589 |
| <i>Bradyrhizobium</i> sp. ORS 285   | GCA_900176205.1 | LT859959.1 | -   | 7.80 | 65.2 | 7015 | 6749 |
| <i>Bradyrhizobium</i> sp. ORS 375   | GCA_000239775.2 | CAFI01     | 497 | 7.86 | 65.5 | 7230 | 6821 |
| <i>Bradyrhizobium</i> sp. R5        | GCA_900101405.1 | FMZW01     | 124 | 9.45 | 63.6 | 8887 | 8309 |
| <i>Bradyrhizobium</i> sp. Rc2d      | GCA_900099855.1 | FNCU01     | 117 | 9.58 | 62.8 | 9149 | 8477 |
| <i>Bradyrhizobium</i> sp. Rc3b      | GCA_900114915.1 | FOUS01     | 49  | 8.38 | 63.7 | 7874 | 7487 |
| <i>Bradyrhizobium</i> sp. S23321    | GCA_000284275.1 | AP012279.1 | -   | 7.23 | 64.3 | 6849 | 6733 |
| <i>Bradyrhizobium</i> sp. STM 3809  | GCA_000239795.2 | CAFJ01     | 803 | 7.31 | 66.2 | 6897 | 6413 |
| <i>Bradyrhizobium</i> sp. STM 3843  | GCA_000239815.2 | CAFK01     | 350 | 8.44 | 63.6 | 7822 | 7470 |
| <i>Bradyrhizobium</i> sp. th.b2     | GCA_000426785.1 | AUGA01     | 266 | 10.1 | 63.3 | 9677 | 8877 |
| <i>Bradyrhizobium</i> sp. Tv2a-2    | GCA_000472425.1 | AXAI01     | 87  | 8.50 | 62.2 | 7955 | 7609 |
| <i>Bradyrhizobium</i> sp. URHA0002  | GCA_000426105.1 | AUES01     | 144 | 6.97 | 62.2 | 6757 | 6390 |
| <i>Bradyrhizobium</i> sp. URHA0013  | GCA_000518345.1 | JADK01     | 23  | 7.19 | 63.8 | 6856 | 6620 |
| <i>Bradyrhizobium</i> sp. URHD0069  | GCA_000701345.1 | JNIJ01     | 129 | 6.79 | 60.7 | 6595 | 6156 |
| <i>Bradyrhizobium</i> sp. USDA 3384 | GCA_000472685.1 | AXAD01     | 51  | 9.80 | 63.6 | 9242 | 8791 |
| <i>Bradyrhizobium</i> sp. WSM1253   | GCA_000244935.1 | AHMB01     | 2   | 8.72 | 63.1 | 8346 | 7851 |
| <i>Bradyrhizobium</i> sp. WSM1417   | GCA_000515415.1 | AZXU01     | 1   | 8.05 | 63.2 | 7628 | 7292 |
| <i>Bradyrhizobium</i> sp. WSM1743   | GCA_000473065.1 | AXAZ01     | 163 | 8.34 | 63.4 | 7858 | 7222 |
| <i>Bradyrhizobium</i> sp. WSM2254   | GCA_000472645.1 | AXAB01     | 100 | 9.09 | 63.9 | 8586 | 8130 |
| <i>Bradyrhizobium</i> sp. WSM2793   | GCA_000379585.1 | ARBF01     | 84  | 8.87 | 63.5 | 8409 | 7865 |
| <i>Bradyrhizobium</i> sp. WSM3983   | GCA_000473045.1 | AXAY01     | 70  | 8.79 | 63.0 | 8416 | 7942 |
| <i>Bradyrhizobium</i> sp. WSM4349   | GCA_000373125.1 | ARDH01     | 104 | 8.29 | 63.1 | 8029 | 7404 |

|                                                              |                 |                                |     |      |      |      |      |
|--------------------------------------------------------------|-----------------|--------------------------------|-----|------|------|------|------|
| <i>Bradyrhizobium</i> sp. WSM471                             | GCA_000244915.1 | CM001442.1                     | -   | 7.78 | 63.4 | 7336 | 6996 |
| <i>Bradyrhizobium</i> sp. YR681                              | GCA_000282615.1 | AKIY01                         | 351 | 7.83 | 64.7 | 7575 | 7139 |
| <i>Bradyrhizobium stylosanthis</i> BR 446                    | GCA_001641335.1 | LVEM01                         | 22  | 8.80 | 64.6 | 8195 | 7957 |
| <i>Bradyrhizobium tropiciagri</i> SEMIA 6148                 | GCA_001189845.1 | LFLZ01                         | 189 | 9.77 | 63.5 | -    | -    |
| <i>Bradyrhizobium valentinum</i> LmjM3                       | GCA_001440405.1 | LLXX01                         | 242 | 8.85 | 61.9 | 8566 | 7796 |
| <i>Bradyrhizobium valentinum</i> LmjM6                       | GCA_001440385.1 | LLXY01                         | 242 | 9.15 | 61.9 | 8718 | 8034 |
| <i>Bradyrhizobium viridifuturi</i> SEMIA 690                 | GCA_001238275.1 | LGTB01                         | 152 | 8.81 | 64.0 | 8372 | 7130 |
| <i>Bradyrhizobium yuanmingense</i> BR3267                    | GCA_001439885.1 | LJYF01                         | 55  | 7.90 | 63.9 | 7318 | 6847 |
| <i>Bradyrhizobium yuanmingense</i> CCBAU 05623               | GCA_000261785.1 | AJQJ01                         | 570 | 8.25 | 63.8 | 8077 | 7249 |
| <i>Bradyrhizobium yuanmingense</i> CCBAU 10071               | GCA_900094575.1 | FMAE01                         | 108 | 8.20 | 63.8 | 7826 | 7334 |
| <i>Bradyrhizobium yuanmingense</i> CCBAU 25021               | GCA_000261805.1 | AJQK01                         | 490 | 7.99 | 63.8 | 7810 | 7021 |
| <i>Bradyrhizobium yuanmingense</i> CCBAU 35157               | GCA_000261825.1 | AJQL01                         | 457 | 7.85 | 63.9 | 7612 | 6906 |
| <i>Bradyrhizobium yuanmingense</i> CGMCC 1.3531 <sup>a</sup> | 2596583575      | -                              | 111 | 8.20 | 63.8 | 7860 | 7777 |
| <i>Brucella abortus</i> 544 <sup>T</sup>                     | GCA_000369945.1 | AQIS01                         | 3   | 3.30 | 57.2 | 3386 | 3155 |
| <i>Brucella abortus</i> NCTC 10505                           | GCA_000740175.1 | NZ_CP007700.1<br>NZ_CP007701.1 | -   | 3.29 | 57.2 | 3371 | 3140 |
| <i>Brucella canis</i> RM6/66 <sup>T</sup>                    | GCA_000740335.1 | NZ_CP007758.1<br>NZ_CP007759.1 | -   | 3.31 | 57.2 | 3361 | 3152 |
| <i>Brucella melitensis</i> 16M <sup>T</sup>                  | GCA_000007125.1 | NC_003317.1<br>NC_003318.1     | -   | 3.31 | 57.2 | 3369 | 3099 |
| <i>Brucella melitensis</i> 20236                             | GCA_001431745.1 | NZ_CP008750.1<br>NZ_CP008751.1 | -   | 3.31 | 57.2 | 3381 | 3140 |
| <i>Brucella microti</i> CCM 4915 <sup>T</sup>                | GCA_000022745.1 | NC_013119.1<br>NC_013118.1     | -   | 3.34 | 57.2 | 3366 | 3198 |
| <i>Brucella ovis</i> ATCC 25840 <sup>T</sup>                 | GCA_000016845.1 | NC_009505.1<br>NC_009504.1     | -   | 3.28 | 57.2 | 3395 | 3043 |
| <i>Chelatococcus daeguensis</i> TAD1                         | GCA_001887265.1 | NZ_CP018095.1                  | -   | 4.10 | 67.9 | 3848 | 3724 |
| <i>Chelatococcus sambhunathii</i> DSM 18167 <sup>T</sup>     | GCA_001418005.1 | LIOL01                         | 35  | 4.37 | 67.8 | 4173 | 4018 |
| <i>Cohaesibacter marisflavi</i> CGMCC 1.9157 <sup>T</sup>    | GCA_900115225.1 | FOVR01                         | 44  | 5.34 | 53.8 | 4868 | 4804 |
| <i>Cucumibacter marinus</i> DSM 18995 <sup>T</sup>           | GCA_000429865.1 | AUCR01                         | 27  | 3.71 | 62.2 | 3586 | 3499 |
| <i>Devosia chinhatensis</i> IPL18 <sup>T</sup>               | GCA_000969445.1 | JZEY01                         | 98  | 3.50 | 62.4 | 3398 | 3257 |
| <i>Devosia enhydra</i> ATCC 23634 <sup>T</sup>               | GCA_900119845.1 | FPKU01                         | 11  | 4.22 | 65.6 | 4080 | 3975 |
| <i>Devosia lucknowensis</i> L15 <sup>T</sup>                 | GCA_900177655.1 | FXWK01                         | 3   | 3.72 | 62.8 | 3665 | 3584 |
| <i>Devosia soli</i> GH2-10 <sup>T</sup>                      | GCA_000970455.1 | LJAG01                         | 48  | 4.14 | 61.0 | 4062 | 3709 |
| <i>Ensifer sojae</i> CCBAU 05684 <sup>T</sup>                | GCA_002288525.1 | NZ_CP023067.1                  | -   | 6.09 | 62.0 | 5887 | 5474 |
| <i>Filomicrobium insigne</i> CGMCC 1.6497 <sup>T</sup>       | GCA_900104305.1 | FNJC01                         | 11  | 3.85 | 57.4 | 3676 | 3562 |
| <i>Fulvimarina manganoxydans</i> CGMCC 1.10972 <sup>T</sup>  | GCA_900176465.1 | FWXR01                         | 55  | 4.83 | 62.9 | 4528 | 4469 |
| <i>Fulvimarina pelagi</i> DSM 15513 <sup>T</sup>             | GCA_001463845.1 | BBWO01                         | 61  | 3.77 | 61.3 | 3523 | 3419 |

|                                                             |                  |               |     |      |      |      |      |
|-------------------------------------------------------------|------------------|---------------|-----|------|------|------|------|
| <i>Hoeflea olei</i> JC234 <sup>†</sup>                      | GCA_001703635.1  | LQZT01        | 74  | 4.72 | 65.5 | 4357 | 4181 |
| <i>Hoeflea phototrophica</i> DFL-43 <sup>†</sup>            | GCA_000154705.2  | NZ_CM002917.1 | -   | 4.47 | 59.8 | 4227 | 4118 |
| <i>Hyphomicrobium denitrificans</i> ATCC 51888 <sup>†</sup> | GCA_000143145.1  | NC_014313.1   | -   | 3.64 | 60.8 | 3542 | 3473 |
| <i>Hyphomicrobium nitrivorans</i> NL23 <sup>†</sup>         | GCA_000503895.1  | NC_022997.1   | -   | 3.65 | 63.9 | 3400 | 3279 |
| <i>Hyphomicrobium zavarzinii</i> ATCC 27496 <sup>†</sup>    | GCA_000383415.1  | ARTG01        | 20  | 4.65 | 63.7 | 4276 | 4175 |
| <i>Kaistia adipata</i> DSM 17808 <sup>†</sup>               | GCA_000423225.1  | AUHO01        | 14  | 4.84 | 67.1 | 4545 | 4423 |
| <i>Kaistia soli</i> DSM 19436 <sup>†</sup>                  | GCA_900129325.1  | FQUP01        | 18  | 5.24 | 64.5 | 4892 | 4851 |
| <i>Liberibacter crescens</i> BT-0                           | GCA_001543305.1  | NZ_CP010522.1 | -   | 1.52 | 35.4 | 1372 | 1299 |
| <i>Liberibacter crescens</i> BT-1 <sup>†</sup>              | GCA_000325745.1  | NC_019907.1   | -   | 1.51 | 35.4 | 1363 | 1245 |
| <i>Maritalea myrionectae</i> DSM 19524 <sup>†</sup>         | GCA_000423365.1  | AUHV01        | 12  | 3.54 | 52.6 | 3472 | 3416 |
| <i>Martellella endophytica</i> YC6887 <sup>†</sup>          | GCA_000960975.1  | NZ_CP010803.1 | -   | 4.82 | 62.1 | 4526 | 4393 |
| <i>Martellella mediterranea</i> DSM 17316 <sup>†</sup>      | GCA_000376125.1  | AQWH01        | 75  | 5.64 | 62.4 | 5301 | 5068 |
| <i>Mesorhizobium australicum</i> WSM2073 <sup>†</sup>       | GCA_000230995.3  | NC_019973.1   | -   | 6.20 | 62.8 | 6068 | 5795 |
| <i>Mesorhizobium ciceri</i> CC1192                          | GCA_001618825.1  | NZ_CP015062.1 | -   | 6.94 | 62.5 | 6826 | 6551 |
| <i>Mesorhizobium ciceri</i> WSM1271                         | GCA_000185905.1  | NC_014923.1   | -   | 6.69 | 62.6 | 6532 | 6264 |
| <i>Mesorhizobium huakuii</i> 7653R                          | GCA_000709395.1  | NZ_CP006581.1 | -   | 6.36 | 63.3 | 6288 | 5885 |
| <i>Mesorhizobium japonicum</i> MAFF303099                   | GCA_000009625.1  | NC_002678.2   | -   | 7.04 | 62.5 | 7487 | 7114 |
| <i>Mesorhizobium opportunistum</i> WSM2075 <sup>†</sup>     | GCA_000176035.2  | NC_015675.1   | -   | 6.88 | 62.9 | 6779 | 6514 |
| <i>Mesorhizobium sophorae</i> ICMP 19535 <sup>†</sup>       | GCA_002270415.1  | NNRI01        | 24  | 8.05 | 62.2 | 7780 | 7205 |
| <i>Mesorhizobium</i> sp. WSM1497                            | GCA_001672455.2  | NZ_CP021070.1 | -   | 7.20 | 62.4 | 7008 | 6654 |
| <i>Methylobacterium extorquens</i> DM4 <sup>†</sup>         | GCA_000083545.1  | NC_012988.1   | -   | 6.12 | 68.0 | 5763 | 5503 |
| <i>Methylobacterium nodulans</i> ORS 2060 <sup>†</sup>      | GCA_000022085.1  | NC_011894.1   | -   | 8.84 | 68.5 | 7471 | 7020 |
| <i>Methylobacterium oryzae</i> CBMB20 <sup>†</sup>          | GCA_000757795.1  | NZ_CP003811.1 | -   | 6.29 | 69.8 | 5771 | 5530 |
| <i>Methylobacterium phyllosphaerae</i> CBMB27 <sup>†</sup>  | GCA_001936175.1  | NZ_CP015367.1 | -   | 6.32 | 69.6 | 5722 | 5506 |
| <i>Methylobacterium populi</i> BJ001 <sup>†</sup>           | GCA_000019945.1  | NC_010725.1   | -   | 5.85 | 69.4 | 5480 | 5289 |
| <i>Methylocapsa aurea</i> KYG <sup>†</sup>                  | GCA_000746085.1  | JQKO01        | 37  | 3.97 | 61.3 | 3703 | 3551 |
| <i>Methylocapsa palsarum</i> NE2 <sup>†</sup>               | GCA_900114285.1  | FOSN01        | 78  | 4.11 | 61.7 | 3885 | 3820 |
| <i>Methylocella silvestris</i> BL2 <sup>†</sup>             | GCA_000021745.1  | NC_011666.1   | -   | 4.31 | 63.1 | 4011 | 3873 |
| <i>Methylocystis bryophila</i> S285                         | GCA_002117405.1  | NZ_CP019948.1 | -   | 4.53 | 63.2 | 4286 | 4150 |
| <i>Methylocystis rosea</i> SV97 <sup>†</sup>                | GCA_000372845.1  | ARCT01        | 2   | 3.91 | 62.5 | 3895 | 3709 |
| <i>Methyloferula stellata</i> AR4 <sup>†</sup>              | GCA_000385335.1  | ARWA01        | 1   | 4.24 | 59.6 | 3961 | 3877 |
| <i>Methylosinus trichosporium</i> OB3b <sup>†</sup>         | GCA_0002752655.1 | CP023737.1    | -   | 5.18 | 65.8 | 4806 | 4565 |
| <i>Microvirga lotononidis</i> WSM3557 <sup>†</sup>          | GCA_000262405.1  | AJUA01        | 104 | 7.08 | 63.1 | 6915 | 6524 |
| <i>Microvirga massiliensis</i> JC119 <sup>†</sup>           | GCA_001006805.1  | CDSD01        | 50  | 9.17 | 62.8 | 8575 | 8045 |
| <i>Neomegalonema perideroedes</i> DSM 15528 <sup>†</sup>    | GCA_000374145.1  | ARFG01        | 22  | 3.41 | 67.2 | 3121 | 3023 |
| <i>Neorhizobium galegae</i> HAMBI 540 <sup>†</sup>          | GCA_000731315.1  | NZ_HG938353.1 | -   | 6.46 | 61.3 | 6271 | 6033 |
| <i>Nitratireductor basaltis</i> RR3-28                      | GCA_001953055.1  | NZ_CP019044.1 | -   | 3.36 | 58.6 | 3237 | 3082 |
| <i>Nitratireductor soli</i> ZZ-1 <sup>†</sup>               | GCA_001050155.1  | LFVY01        | 60  | 5.13 | 64.1 | 5000 | 4839 |

|                                                              |                 |                            |     |      |      |      |      |
|--------------------------------------------------------------|-----------------|----------------------------|-----|------|------|------|------|
| <i>Nitrobacter hamburgensis</i> X14 <sup>†</sup>             | GCA_000013885.1 | NC_007964.1                | -   | 4.41 | 61.7 | 4240 | 396  |
| <i>Nitrobacter vulgaris</i> Ab1                              | GCA_002028545.1 | MWPQ01                     | 96  | 3.90 | 59.8 | 3739 | 3501 |
| <i>Nitrobacter winogradskyi</i> Nb-255 <sup>†</sup>          | GCA_000012725.1 | NC_007406.1                | -   | 3.40 | 62.0 | 3224 | 2984 |
| <i>Ochrobactrum anthropi</i> ATCC 49188 <sup>†</sup>         | GCA_000017405.1 | NC_009667.1<br>NC_009668.1 | -   | 5.21 | 56.2 | 5087 | 4870 |
| <i>Ochrobactrum intermedium</i> LMG 3301 <sup>†</sup>        | GCA_000182645.1 | ACQA01                     | 4   | 4.73 | 57.7 | 4571 | 4269 |
| <i>Oligotropha carboxidovorans</i> ATCC 49405 <sup>†</sup>   | GCA_000021365.1 | NC_011386.1                | -   | 3.75 | 62.4 | 3616 | 3518 |
| <i>Paramesorhizobium deserti</i> A-3-E <sup>†</sup>          | GCA_001558695.1 | LNTU011                    | 41  | 5.48 | 60.9 | 5149 | 4946 |
| <i>Pararhizobium polonicum</i> F5.1 <sup>†</sup>             | GCA_001687365.1 | LGLV01                     | 31  | 5.90 | 61.2 | 5591 | 5430 |
| <i>Pelagibacterium halotolerans</i> B2 <sup>†</sup>          | GCA_000230555.1 | NC_016078.1                | -   | 3.94 | 61.4 | 3858 | 3755 |
| <i>Pelagibacterium luteolum</i> CGMCC 1.10267 <sup>†</sup>   | GCA_900100665.1 | FNCS01                     | 51  | 4.30 | 60.4 | 4327 | 4266 |
| <i>Pleomorphomonas koreensis</i> DSM 23070 <sup>†</sup>      | GCA_000425185.1 | AULH01                     | 76  | 4.62 | 67.2 | 4318 | 4230 |
| <i>Pleomorphomonas oryzae</i> DSM 16300 <sup>†</sup>         | GCA_000422965.1 | AUHB01                     | 39  | 5.23 | 63.0 | 4857 | 4733 |
| <i>Prosthecomicrobium hirschii</i> 16                        | GCA_001305515.1 | LJYW01                     | 52  | 6.48 | 68.8 | 5710 | 5502 |
| <i>Pseudaminobacter manganicus</i> JH-7 <sup>†</sup>         | GCA_002075885.1 | MEDT01                     | 60  | 4.84 | 61.2 | 4685 | 4504 |
| <i>Pseudaminobacter salicylatoxidans</i> KCT001              | GCA_000304395.1 | CAIU01                     | 53  | 4.61 | 62.8 | 4456 | 3981 |
| <i>Pseudorhizobium pelagicum</i> R1-200B4                    | GCA_000722615.1 | JAKI01                     | 62  | 5.14 | 62.8 | 4998 | 4791 |
| <i>Rhizobium etli</i> CFN 42 <sup>†</sup>                    | GCA_000092045.1 | NC_007761.1                | -   | 6.53 | 61.1 | 6435 | 5992 |
| <i>Rhizobium favelukesii</i> LPU83 <sup>†</sup>              | GCA_000577275.1 | NZ_HG916852.1              | -   | 7.04 | 59.6 | 8202 | 7513 |
| <i>Rhizobium gallicum</i> R602 <sup>†</sup>                  | GCA_000816845.1 | NZ_CP006877.1              | -   | 7.31 | 59.6 | 7138 | 6674 |
| <i>Rhizobium grahamii</i> CCGE 502 <sup>†</sup>              | GCA_000298315.2 | AEYE02                     | 80  | 7.15 | 59.4 | 6898 | 6844 |
| <i>Rhizobium leguminosarum</i> WSM1689                       | GCA_000517605.1 | NZ_CP007045.1              | -   | 6.90 | 60.9 | 6760 | 6429 |
| <i>Rhizobium tropici</i> CIAT 899 <sup>†</sup>               | GCA_000330885.1 | NC_020059.1                | -   | 6.69 | 59.5 | 6419 | 6208 |
| <i>Rhodoblastus acidophilus</i> DSM 137 <sup>†</sup>         | GCA_900187365.1 | FYDG01                     | 74  | 4.71 | 65.3 | 4490 | 4422 |
| <i>Rhodomicrobium vannielii</i> ATCC 17100 <sup>†</sup>      | GCA_000166055.1 | NC_014664.1                | -   | 4.02 | 62.2 | 3724 | 3600 |
| <i>Rhodopseudomonas palustris</i> BisA53                     | GCA_000014825.1 | NC_008435.1                | -   | 5.51 | 64.4 | 4959 | 4834 |
| <i>Rhodopseudomonas palustris</i> BisB18                     | GCA_000013745.1 | NC_007925.1                | -   | 5.51 | 65.0 | 5000 | 4858 |
| <i>Rhodopseudomonas palustris</i> CGA009                     | GCA_000195775.1 | NC_005296.1                | -   | 5.47 | 65.0 | 4996 | 4874 |
| <i>Rhodopseudomonas palustris</i> HaA2                       | GCA_000013365.1 | NC_007778.1                | -   | 5.33 | 66.0 | 4785 | 4673 |
| <i>Rhodopseudomonas pseudopalustris</i> DSM 123 <sup>†</sup> | GCA_900110435.1 | FODT01                     | 29  | 5.27 | 64.6 | 4883 | 4821 |
| <i>Salinarimonas rosea</i> DSM 21201 <sup>†</sup>            | GCA_000429045.1 | AUBC01                     | 62  | 5.25 | 71.8 | 4903 | 4735 |
| <i>Sinorhizobium fredii</i> NGR234                           | GCA_000018545.1 | NC_012587.1                | -   | 6.89 | 62.4 | 6472 | 6362 |
| <i>Sinorhizobium fredii</i> USDA 205T                        | GCA_001461695.1 | AUTC01                     | 209 | 6.58 | 62.3 | 6377 | 5774 |
| <i>Sinorhizobium meliloti</i> 1021                           | GCA_000006965.1 | NC_003047.1                | -   | 6.69 | 62.2 | 6292 | 6218 |
| <i>Tardiphaga robiniae</i> Vaf-07                            | GCA_001618955.1 | LVYV01                     | 56  | 6.36 | 61.5 | 5883 | 5722 |
| <i>Tardiphaga</i> sp. OK246                                  | GCA_900188215.1 | FZOX01                     | 19  | 6.75 | 61.4 | 6346 | 6165 |
| <i>Terasakiella pusilla</i> DSM 6293 <sup>†</sup>            | GCA_000688235.1 | JHYO01                     | 85  | 4.05 | 50.0 | 3967 | 3783 |

<sup>†</sup>Genomes downloaded from the JGI IMG server instead of the NCBI ftp server.
