# Supplementary material for: Phylogenomic Analyses of Bradyrhizobium Reveal Uneven Distribution of the Lateral and Subpolar Flagellar Systems, Which Extends to Rhizobiales
Source: MDPI journal article supplement (doi:10.3390/microorganisms7020050), 2019-02-13
Supplement: s1 [file s1]

**Supplementary Table S3.** First 10 closest relatives of 31 *Bradyrhizobium diazoefficiens* USDA 110<sup>T</sup> protein sequences of the lateral flagellar system based on blastp against the nr NCBI protein database. *Rhodopseudomonas* and *Tardiphaga* are highlighted in green and orange respectively.

| Query ID | Closest relative                          | Subject ID     | Identity % | Align. length | Mismatches | Gap opens | Q. start | Q. end | S. start | S. end | evalue   | bit score | Cover . % |
|----------|-------------------------------------------|----------------|------------|---------------|------------|-----------|----------|--------|----------|--------|----------|-----------|-----------|
| LafR     | <i>Rhodopseudomonas palustris</i> BisA53  | WP_011662623.1 | 62.34      | 231           | 83         | 1         | 9        | 235    | 1        | 231    | 2.00E-97 | 298       | 86        |
|          | <i>Tardiphaga</i> sp. OK245               | SEH75824.1     | 60.18      | 221           | 88         | 0         | 9        | 229    | 1        | 221    | 9.00E-94 | 288       | 84        |
|          | <i>Tardiphaga</i> sp. Vaf0                | WP_068729849.1 | 60.18      | 221           | 88         | 0         | 9        | 229    | 1        | 221    | 1.00E-93 | 288       | 84        |
|          | <i>Rhodopseudomonas palustris</i> BisB18  | WP_011471593.1 | 60.18      | 221           | 88         | 0         | 9        | 229    | 1        | 221    | 2.00E-91 | 282       | 84        |
|          | <i>Microvirga massiliensis</i>            | WP_046868826.1 | 56.42      | 218           | 95         | 0         | 9        | 226    | 1        | 218    | 1.00E-80 | 254       | 83        |
|          | <i>Pseudaminobacter salicylatoxidans</i>  | WP_019173192.1 | 54.09      | 220           | 101        | 0         | 9        | 228    | 1        | 220    | 9.00E-79 | 249       | 83        |
|          | <i>Fulvimarina pelagi</i> HTCC2506        | WP_007067687.1 | 52.7       | 222           | 105        | 0         | 9        | 230    | 1        | 222    | 9.00E-79 | 249       | 84        |
|          | <i>Aquamicrobium defluvii</i>             | WP_035024249.1 | 55.66      | 221           | 96         | 2         | 9        | 228    | 1        | 220    | 1.00E-78 | 249       | 83        |
|          | <i>Mesorhizobium</i> sp. WSM1293          | WP_027161427.1 | 54.55      | 220           | 100        | 0         | 9        | 228    | 1        | 220    | 1.00E-78 | 249       | 83        |
|          | <i>Beijerinckia indica</i> ATCC 9039      | WP_012386292.1 | 54.59      | 218           | 99         | 0         | 9        | 226    | 1        | 218    | 2.00E-78 | 249       | 83        |
| FlgN     | <i>Pleomorphomonas oryzae</i>             | WP_051228408.1 | 37.91      | 153           | 81         | 4         | 12       | 161    | 1        | 142    | 7.00E-20 | 92.4      | 88        |
|          | <i>Rhodopseudomonas palustris</i> BisA53  | WP_011662621.1 | 45.1       | 102           | 56         | 0         | 61       | 162    | 52       | 153    | 4.00E-19 | 90.5      | 60        |
|          | <i>Tardiphaga</i> sp. Vaf07               | WP_068729853.1 | 43.14      | 102           | 58         | 0         | 61       | 162    | 54       | 155    | 1.00E-18 | 89.4      | 60        |
|          | <i>Afifella marina</i> DSM 2698           | SCZ28776.1     | 43.81      | 105           | 59         | 0         | 58       | 162    | 14       | 118    | 2.00E-18 | 87.8      | 62        |
|          | <i>Tardiphaga</i> sp. OK245               | SEH75855.1     | 42.16      | 102           | 59         | 0         | 61       | 162    | 54       | 155    | 3.00E-18 | 88.2      | 60        |
|          | <i>Methylobacterium nodulans</i> ORS 2060 | WP_015933062.1 | 43.27      | 104           | 59         | 0         | 60       | 163    | 2        | 105    | 4.00E-18 | 86.7      | 61        |
|          | <i>Hyphomicrobium</i> sp. CS1GBMeth3      | WP_072397425.1 | 46         | 100           | 54         | 0         | 63       | 162    | 2        | 101    | 6.00E-18 | 85.9      | 59        |
|          | <i>Hyphomicrobium nitratorans</i> NL23    | WP_023786207.1 | 34.84      | 155           | 86         | 3         | 11       | 162    | 1        | 143    | 1.00E-17 | 86.3      | 89        |
|          | <i>Afifella pfennigii</i>                 | WP_051630254.1 | 43.81      | 105           | 59         | 0         | 60       | 164    | 17       | 121    | 1.00E-17 | 85.5      | 62        |
|          | <i>Aurantimonas</i> sp. Leaf443           | WP_055852416.1 | 38.83      | 103           | 63         | 0         | 60       | 162    | 5        | 107    | 2.00E-17 | 84.7      | 61        |
| FlgJ     | <i>Rhodopseudomonas palustris</i> BisB18  | WP_011471590.1 | 52.32      | 151           | 63         | 4         | 12       | 156    | 1        | 148    | 4.00E-39 | 142       | 85        |
|          | <i>Tardiphaga</i> sp. OK245               | SEH75870.1     | 50.35      | 143           | 65         | 3         | 19       | 160    | 9        | 146    | 2.00E-38 | 140       | 84        |
|          | <i>Tardiphaga</i> sp. Vaf07               | WP_068729855.1 | 50.35      | 143           | 65         | 3         | 19       | 160    | 9        | 146    | 2.00E-38 | 140       | 84        |
|          | <i>Rhodopseudomonas palustris</i> BisA53  | WP_011662620.1 | 52.63      | 152           | 60         | 5         | 12       | 155    | 1        | 148    | 3.00E-35 | 132       | 85        |
|          | <i>Sinorhizobium americanum</i> CCGM7     | WP_037378661.1 | 49.67      | 151           | 67         | 4         | 12       | 161    | 1        | 143    | 4.00E-32 | 125       | 88        |
|          | <i>Sinorhizobium saheli</i>               | WP_066875342.1 | 49.33      | 150           | 69         | 3         | 12       | 161    | 1        | 143    | 8.00E-32 | 124       | 88        |
|          | <i>Sinorhizobium</i> sp. CCBAU 05631      | WP_037423965.1 | 49.67      | 151           | 67         | 4         | 12       | 161    | 1        | 143    | 1.00E-31 | 124       | 88        |
|          | <i>Rhizobium</i> sp. 2MFCol3.1            | WP_026282998.1 | 47.22      | 144           | 70         | 2         | 12       | 155    | 1        | 138    | 1.00E-31 | 124       | 85        |
|          | <i>Rhizobium grahamii</i> CCGE 502        | WP_016552788.1 | 47.22      | 144           | 70         | 3         | 12       | 155    | 1        | 138    | 2.00E-31 | 123       | 85        |
|          | <i>Rhizobium favelukesii</i>              | CDM56506.1     | 44.67      | 150           | 77         | 2         | 6        | 155    | 28       | 171    | 2.00E-31 | 124       | 88        |

|      |                                          |                |       |     |     |   |    |     |    |     |          |      |     |
|------|------------------------------------------|----------------|-------|-----|-----|---|----|-----|----|-----|----------|------|-----|
| FliR | <i>Rhodopseudomonas palustris</i> BisA53 | WP_011662618.1 | 59.04 | 249 | 100 | 2 | 1  | 249 | 1  | 247 | 2.00E-84 | 264  | 99  |
|      | <i>Rhodopseudomonas palustris</i> BisB18 | WP_011471588.1 | 57.43 | 249 | 104 | 2 | 1  | 249 | 1  | 247 | 2.00E-80 | 254  | 99  |
|      | <i>Tardiphaga</i> sp. OK245              | SEH75895.1     | 56.22 | 249 | 107 | 2 | 1  | 249 | 1  | 247 | 7.00E-80 | 253  | 99  |
|      | <i>Tardiphaga</i> sp. Vaf07              | WP_068729859.1 | 55.82 | 249 | 108 | 2 | 1  | 249 | 1  | 247 | 1.00E-79 | 253  | 99  |
|      | <i>Microvirga ossetica</i>               | ANY79453.1     | 50.4  | 250 | 124 | 0 | 1  | 250 | 1  | 250 | 4.00E-79 | 251  | 100 |
|      | <i>Labrenzia alexandrii</i>              | WP_050776216.1 | 48.96 | 241 | 123 | 0 | 9  | 249 | 11 | 251 | 1.00E-73 | 237  | 96  |
|      | <i>Methylobacterium</i> sp. 174MFSHa1.1  | SFV13187.1     | 45.45 | 242 | 132 | 0 | 7  | 248 | 7  | 248 | 2.00E-72 | 234  | 97  |
|      | <i>Methylobacterium</i> sp. WSM2598      | WP_018263278.1 | 50    | 244 | 122 | 0 | 7  | 250 | 12 | 255 | 5.00E-72 | 233  | 98  |
|      | <i>Methylobacterium</i> sp. 4-46         | WP_012336149.1 | 50    | 244 | 122 | 0 | 7  | 250 | 12 | 255 | 6.00E-72 | 233  | 98  |
|      | <i>Labrenzia</i> sp. OB1                 | KZM48079.1     | 48.98 | 245 | 123 | 2 | 6  | 249 | 8  | 251 | 6.00E-72 | 233  | 98  |
| FliA | <i>Rhodopseudomonas palustris</i> BisB18 | WP_011471587.1 | 76.69 | 695 | 160 | 1 | 1  | 693 | 1  | 695 | 0        | 1065 | 100 |
|      | <i>Tardiphaga</i> sp. OK245              | SEH75910.1     | 76.55 | 695 | 161 | 1 | 1  | 693 | 1  | 695 | 0        | 1036 | 100 |
|      | <i>Rhodopseudomonas palustris</i> BisA53 | WP_011662617.1 | 76.83 | 695 | 159 | 1 | 1  | 693 | 1  | 695 | 0        | 1036 | 100 |
|      | <i>Tardiphaga</i> sp. Vaf07              | WP_068729860.1 | 76.26 | 695 | 163 | 1 | 1  | 693 | 1  | 695 | 0        | 1034 | 100 |
|      | <i>Methylocella silvestris</i> BL2       | WP_012589102.1 | 70.4  | 696 | 203 | 2 | 1  | 693 | 1  | 696 | 0        | 996  | 100 |
|      | <i>Methylocapsa palsarum</i>             | SFK04492.1     | 69.81 | 699 | 202 | 3 | 1  | 693 | 1  | 696 | 0        | 991  | 100 |
|      | <i>Chelatococcus sambhunathii</i>        | WP_055457833.1 | 71.22 | 695 | 198 | 1 | 1  | 693 | 1  | 695 | 0        | 991  | 100 |
|      | <i>Pseudoxanthobacter soli</i> DSM 19599 | WP_073626723.1 | 69.67 | 699 | 206 | 3 | 1  | 693 | 1  | 699 | 0        | 989  | 100 |
|      | <i>Ochrobactrum rhizosphaerae</i>        | WP_024895880.1 | 69.54 | 696 | 201 | 3 | 6  | 693 | 4  | 696 | 0        | 989  | 99  |
|      | <i>Ochrobactrum</i> sp. CDB2             | WP_007877012.1 | 69.7  | 693 | 205 | 2 | 6  | 693 | 4  | 696 | 0        | 988  | 99  |
| FliQ | <i>Rhodopseudomonas palustris</i> BisB18 | WP_011471586.1 | 76.14 | 88  | 21  | 0 | 1  | 88  | 1  | 88  | 1.00E-40 | 140  | 100 |
|      | <i>Rhodopseudomonas palustris</i> BisA53 | WP_011662616.1 | 73.86 | 88  | 23  | 0 | 1  | 88  | 1  | 88  | 5.00E-40 | 139  | 100 |
|      | <i>Rhizobium</i> sp. Root482             | WP_056329526.1 | 70.45 | 88  | 26  | 0 | 1  | 88  | 1  | 88  | 8.00E-37 | 131  | 100 |
|      | <i>Azorhizobium doebereineriae</i>       | WP_029005600.1 | 70.45 | 88  | 26  | 0 | 1  | 88  | 1  | 88  | 1.00E-36 | 130  | 100 |
|      | <i>Methylocapsa aurea</i>                | WP_036261320.1 | 71.59 | 88  | 25  | 0 | 1  | 88  | 1  | 88  | 1.00E-36 | 130  | 100 |
|      | <i>Rhizobium arenae</i>                  | WP_075292506.1 | 69.32 | 88  | 27  | 0 | 1  | 88  | 1  | 88  | 2.00E-36 | 130  | 100 |
|      | <i>Rhizobium</i> sp. Root1204            | WP_060504651.1 | 69.32 | 88  | 27  | 0 | 1  | 88  | 1  | 88  | 2.00E-36 | 129  | 100 |
|      | <i>Rhizobium giardinii</i>               | WP_018324196.1 | 69.32 | 88  | 27  | 0 | 1  | 88  | 1  | 88  | 3.00E-36 | 129  | 100 |
|      | <i>Pararhizobium polonicum</i>           | WP_068957982.1 | 69.32 | 88  | 27  | 0 | 1  | 88  | 1  | 88  | 3.00E-36 | 129  | 100 |
|      | <i>Sinorhizobium</i> sp. A49             | WP_077504318.1 | 70.45 | 88  | 26  | 0 | 1  | 88  | 1  | 88  | 6.00E-36 | 129  | 100 |
| FliG | <i>Tardiphaga</i> sp. OK245              | SEH75945.1     | 63.48 | 115 | 42  | 0 | 24 | 138 | 22 | 136 | 3.00E-47 | 161  | 82  |
|      | <i>Tardiphaga</i> sp. Vaf07              | WP_068729864.1 | 63.96 | 111 | 40  | 0 | 28 | 138 | 25 | 135 | 2.00E-46 | 159  | 79  |
|      | <i>Rhodopseudomonas palustris</i> BisA53 | WP_011662615.1 | 65.18 | 112 | 39  | 0 | 27 | 138 | 24 | 135 | 8.00E-46 | 157  | 80  |
|      | <i>Rhodopseudomonas palustris</i> BisB18 | WP_011471585.1 | 63.96 | 111 | 40  | 0 | 28 | 138 | 25 | 135 | 6.00E-44 | 153  | 79  |
|      | <i>Mesorhizobium</i> sp. YR577           | SFU06062.1     | 59.65 | 114 | 43  | 1 | 27 | 140 | 24 | 134 | 1.00E-40 | 144  | 81  |
|      | <i>Chelatococcus sambhunathii</i>        | WP_055457835.1 | 52.17 | 138 | 61  | 2 | 1  | 138 | 1  | 133 | 4.00E-39 | 140  | 99  |

|      |                                          |                |       |     |     |   |    |     |    |     |           |     |     |
|------|------------------------------------------|----------------|-------|-----|-----|---|----|-----|----|-----|-----------|-----|-----|
|      | <i>Hyphomicrobium sulfonivorans</i>      | WP_068462040.1 | 49.63 | 135 | 65  | 1 | 4  | 138 | 6  | 137 | 7.00E-39  | 140 | 96  |
|      | <i>Hyphomicrobium sulfonivorans</i>      | KWT67430.1     | 49.63 | 135 | 65  | 1 | 4  | 138 | 11 | 142 | 8.00E-39  | 140 | 96  |
|      | <i>Mesorhizobium</i> sp. SCN 65-12       | ODT17668.1     | 57.14 | 119 | 48  | 2 | 19 | 137 | 12 | 127 | 3.00E-38  | 138 | 85  |
|      | <i>Mesorhizobium</i> sp. 65-26           | OJX71690.1     | 57.14 | 119 | 48  | 2 | 19 | 137 | 17 | 132 | 4.00E-38  | 137 | 85  |
| FlbT | <i>Rhodopseudomonas palustris</i>        | WP_041802495.1 | 62.2  | 127 | 48  | 0 | 1  | 127 | 1  | 127 | 6.00E-52  | 173 | 93  |
|      | <i>Rhodopseudomonas palustris</i> BisB18 | ABD86679.1     | 62.2  | 127 | 48  | 0 | 1  | 127 | 5  | 131 | 8.00E-52  | 173 | 93  |
|      | <i>Tardiphaga</i> sp. OK245              | SEH75959.1     | 62.12 | 132 | 50  | 0 | 1  | 132 | 5  | 136 | 2.00E-51  | 172 | 97  |
|      | <i>Tardiphaga</i> sp. Vaf07              | WP_068730432.1 | 59.85 | 132 | 53  | 0 | 1  | 132 | 1  | 132 | 2.00E-50  | 169 | 97  |
|      | <i>Rhodopseudomonas palustris</i> BisA53 | ABJ05128.1     | 58.91 | 129 | 53  | 0 | 1  | 129 | 5  | 133 | 2.00E-47  | 161 | 95  |
|      | <i>Aurantimonas coralicida</i>           | WP_024350343.1 | 53.97 | 126 | 58  | 0 | 1  | 126 | 4  | 129 | 1.00E-43  | 152 | 93  |
|      | <i>Aurantimonas manganooxydans</i>       | WP_009210322.1 | 53.97 | 126 | 58  | 0 | 1  | 126 | 4  | 129 | 3.00E-43  | 151 | 93  |
|      | <i>Aurantimonas</i> sp. USBA 369         | WP_078707276.1 | 52.38 | 126 | 60  | 0 | 1  | 126 | 4  | 129 | 5.00E-43  | 151 | 93  |
|      | <i>Methylocapsa aurea</i>                | WP_036261316.1 | 55.88 | 136 | 60  | 0 | 1  | 136 | 1  | 136 | 1.00E-42  | 149 | 100 |
|      | <i>Beijerinckia mobilis</i>              | WP_034991350.1 | 52.21 | 136 | 65  | 0 | 1  | 136 | 1  | 136 | 4.00E-41  | 145 | 100 |
| FlaF | <i>Rhodopseudomonas palustris</i> BisB18 | WP_011471583.1 | 58.77 | 114 | 47  | 0 | 4  | 117 | 1  | 114 | 2.00E-40  | 142 | 97  |
|      | <i>Rhodopseudomonas palustris</i> BisA53 | WP_011662613.1 | 52.63 | 114 | 54  | 0 | 4  | 117 | 1  | 114 | 2.00E-36  | 132 | 97  |
|      | <i>Tardiphaga</i> sp. OK245              | SEH75973.1     | 55.26 | 114 | 51  | 0 | 4  | 117 | 1  | 114 | 3.00E-36  | 132 | 97  |
|      | <i>Tardiphaga</i> sp. Vaf07              | WP_068729866.1 | 54.39 | 114 | 52  | 0 | 4  | 117 | 1  | 114 | 2.00E-35  | 129 | 97  |
|      | <i>Pseudovibrio</i> sp. W64              | WP_063303770.1 | 46.36 | 110 | 59  | 0 | 8  | 117 | 5  | 114 | 1.00E-26  | 107 | 94  |
|      | <i>Pseudovibrio</i> sp. JE062            | WP_008551915.1 | 47.27 | 110 | 58  | 0 | 8  | 117 | 5  | 114 | 2.00E-26  | 106 | 94  |
|      | <i>Pseudovibrio stylochi</i>             | WP_068082031.1 | 48.65 | 111 | 55  | 2 | 8  | 117 | 5  | 114 | 1.00E-25  | 104 | 94  |
|      | <i>Pseudovibrio</i> sp. W74              | WP_063288346.1 | 45.45 | 110 | 60  | 0 | 8  | 117 | 5  | 114 | 2.00E-25  | 103 | 94  |
|      | <i>Pseudovibrio</i> sp. POLY-S9          | WP_057466032.1 | 46.36 | 110 | 59  | 0 | 8  | 117 | 5  | 114 | 3.00E-25  | 103 | 94  |
|      | <i>Pseudovibrio</i> sp. FO-BEG1          | WP_014285252.1 | 46.36 | 110 | 59  | 0 | 8  | 117 | 5  | 114 | 4.00E-25  | 103 | 94  |
| FlgL | <i>Tardiphaga</i> sp. Vaf07              | WP_068729868.1 | 55.84 | 351 | 151 | 1 | 2  | 352 | 1  | 347 | 2.00E-128 | 385 | 99  |
|      | <i>Rhodopseudomonas palustris</i> BisB18 | WP_011471582.1 | 57.26 | 351 | 146 | 1 | 2  | 352 | 1  | 347 | 7.00E-128 | 383 | 99  |
|      | <i>Rhodopseudomonas palustris</i> BisA53 | WP_011662612.1 | 54.99 | 351 | 154 | 1 | 2  | 352 | 1  | 347 | 4.00E-124 | 374 | 99  |
|      | <i>Tardiphaga</i> sp. OK245              | SEH75988.1     | 51.85 | 351 | 165 | 1 | 2  | 352 | 1  | 347 | 8.00E-111 | 340 | 99  |
|      | <i>Salinarimonas rosea</i>               | WP_029030043.1 | 43.91 | 353 | 192 | 2 | 2  | 352 | 1  | 349 | 3.00E-92  | 292 | 99  |
|      | <i>Cohaesibacter marisflavi</i>          | SFN83554.1     | 43.97 | 348 | 191 | 1 | 5  | 352 | 3  | 346 | 4.00E-89  | 284 | 99  |
|      | <i>Beijerinckia mobilis</i>              | WP_034991347.1 | 44.44 | 351 | 191 | 1 | 2  | 352 | 1  | 347 | 3.00E-88  | 281 | 99  |
|      | <i>Labrenzia</i> sp. CP4                 | WP_062488688.1 | 44.44 | 351 | 192 | 2 | 2  | 352 | 1  | 348 | 6.00E-88  | 281 | 99  |
|      | <i>Bosea vaviloviae</i>                  | WP_069688505.1 | 45.99 | 337 | 180 | 1 | 16 | 352 | 15 | 349 | 1.00E-86  | 278 | 96  |
|      | <i>Bosea</i> sp. RAC05                   | WP_069053035.1 | 43.63 | 353 | 193 | 2 | 2  | 352 | 1  | 349 | 1.00E-85  | 275 | 99  |
| FlgK | <i>Rhodopseudomonas palustris</i> BisA53 | WP_011662611.1 | 67.89 | 489 | 157 | 0 | 1  | 489 | 1  | 489 | 0         | 668 | 99  |
|      | <i>Tardiphaga</i> sp. OK245              | SEH76002.1     | 66.33 | 490 | 164 | 1 | 1  | 490 | 1  | 489 | 0         | 652 | 99  |

|      |                                          |                |       |     |     |    |     |     |     |     |           |      |     |
|------|------------------------------------------|----------------|-------|-----|-----|----|-----|-----|-----|-----|-----------|------|-----|
|      | <i>Tardiphaga</i> sp. Vaf07              | WP_068729871.1 | 64.49 | 490 | 173 | 1  | 1   | 490 | 1   | 489 | 0         | 637  | 99  |
|      | <i>Rhodopseudomonas palustris</i> BisB18 | WP_011471581.1 | 65.92 | 490 | 167 | 0  | 1   | 490 | 1   | 490 | 0         | 636  | 99  |
|      | <i>Bosea vaviloviae</i>                  | WP_069688504.1 | 52.03 | 492 | 232 | 3  | 1   | 489 | 1   | 491 | 1.00E-163 | 485  | 99  |
|      | <i>Pleomorphomonas oryzae</i>            | WP_026790439.1 | 52.76 | 489 | 223 | 4  | 1   | 489 | 1   | 481 | 1.00E-161 | 480  | 99  |
|      | <i>Hyphomicrobium</i> sp. NDB2Meth4      | WP_072370935.1 | 51.12 | 491 | 237 | 3  | 1   | 490 | 1   | 489 | 5.00E-160 | 476  | 99  |
|      | <i>Polymorphum gilvum</i> SL003B-26A1    | WP_013654603.1 | 52.12 | 495 | 229 | 3  | 1   | 488 | 1   | 494 | 1.00E-158 | 473  | 99  |
|      | <i>Microvirga ossetica</i>               | ANY79446.1     | 52.32 | 495 | 223 | 6  | 1   | 490 | 1   | 487 | 3.00E-158 | 471  | 99  |
|      | <i>Pannonibacter phragmitetus</i>        | WP_019963533.1 | 50.71 | 495 | 236 | 4  | 1   | 489 | 1   | 493 | 1.00E-156 | 467  | 99  |
| FlgE | <i>Tardiphaga</i> sp. Vaf07              | WP_068729872.1 | 60.85 | 424 | 144 | 5  | 1   | 410 | 1   | 416 | 3.00E-166 | 486  | 100 |
|      | <i>Tardiphaga</i> sp. OK245              | SEH76016.1     | 60.38 | 424 | 146 | 5  | 1   | 410 | 1   | 416 | 2.00E-165 | 484  | 100 |
|      | <i>Rhodopseudomonas palustris</i> BisA53 | WP_011662610.1 | 62.62 | 420 | 138 | 6  | 1   | 410 | 1   | 411 | 5.00E-160 | 470  | 100 |
|      | <i>Rhodopseudomonas palustris</i> BisB18 | WP_011471580.1 | 60.24 | 420 | 148 | 6  | 1   | 410 | 1   | 411 | 5.00E-147 | 436  | 100 |
|      | <i>Phyllobacterium</i> sp. OV277         | SDP79438.1     | 52.07 | 434 | 178 | 9  | 1   | 410 | 1   | 428 | 3.00E-128 | 389  | 100 |
|      | <i>Mesorhizobium</i> sp. F7              | WP_047565792.1 | 51.72 | 435 | 171 | 10 | 1   | 410 | 1   | 421 | 6.00E-128 | 388  | 100 |
|      | <i>Bosea</i> sp. Root381                 | WP_056798292.1 | 51.64 | 428 | 179 | 10 | 1   | 410 | 1   | 418 | 3.00E-124 | 379  | 100 |
|      | <i>Chelatococcus sambhunathii</i>        | WP_055457839.1 | 51.8  | 417 | 179 | 8  | 1   | 410 | 1   | 402 | 4.00E-124 | 378  | 100 |
|      | <i>Chelatococcus daeguensis</i>          | WP_063187178.1 | 51.8  | 417 | 179 | 8  | 1   | 410 | 1   | 402 | 4.00E-124 | 378  | 100 |
|      | <i>Mesorhizobium opportunistum</i>       | WP_013893199.1 | 52.19 | 433 | 169 | 11 | 1   | 410 | 1   | 418 | 1.00E-123 | 377  | 100 |
| FliK | <i>Rhodopseudomonas palustris</i> BisB18 | WP_011471578.1 | 44.37 | 142 | 77  | 2  | 232 | 371 | 146 | 287 | 1.00E-23  | 110  | 32  |
|      | <i>Tardiphaga</i> sp. OK245              | SEH76046.1     | 37.74 | 212 | 120 | 6  | 234 | 435 | 198 | 407 | 1.00E-21  | 106  | 46  |
|      | <i>Tardiphaga</i> sp. Vaf07              | WP_068729874.1 | 39.57 | 139 | 80  | 3  | 225 | 360 | 189 | 326 | 7.00E-21  | 103  | 31  |
|      | <i>Rhodopseudomonas palustris</i> BisA53 | WP_011662608.1 | 37.44 | 219 | 120 | 7  | 228 | 435 | 113 | 325 | 5.00E-20  | 100  | 48  |
|      | <i>Bosea vaviloviae</i>                  | WP_069688529.1 | 29.84 | 258 | 148 | 8  | 185 | 426 | 143 | 383 | 2.00E-16  | 91.3 | 56  |
|      | <i>Labrenzia</i> sp. C1B10               | WP_022998508.1 | 34.45 | 209 | 123 | 6  | 228 | 431 | 213 | 412 | 2.00E-14  | 85.9 | 47  |
|      | <i>Labrenzia aggregata</i>               | WP_075282140.1 | 33.97 | 209 | 124 | 6  | 228 | 431 | 213 | 412 | 1.00E-13  | 83.2 | 47  |
|      | <i>Labrenzia</i> sp. CP4                 | WP_062488686.1 | 34.45 | 209 | 121 | 7  | 228 | 431 | 213 | 410 | 3.00E-13  | 82   | 47  |
|      | <i>Pleomorphomonas oryzae</i>            | WP_026790470.1 | 33.77 | 151 | 83  | 5  | 215 | 355 | 192 | 335 | 4.00E-13  | 81.3 | 32  |
|      | <i>Bosea</i> sp. PAMC 26642              | WP_066617408.1 | 32.72 | 162 | 92  | 5  | 240 | 392 | 185 | 338 | 1.00E-12  | 79.7 | 35  |
| MotC | <i>Tardiphaga</i> sp. Vaf07              | WP_068729875.1 | 49.01 | 355 | 177 | 2  | 24  | 374 | 29  | 383 | 1.00E-100 | 316  | 91  |
|      | <i>Tardiphaga</i> sp. OK245              | SEH76064.1     | 48.73 | 355 | 178 | 2  | 24  | 374 | 29  | 383 | 5.00E-100 | 315  | 91  |
|      | <i>Rhodopseudomonas palustris</i> BisB18 | WP_011471577.1 | 48.18 | 357 | 180 | 4  | 25  | 376 | 30  | 386 | 4.00E-98  | 310  | 91  |
|      | <i>Rhodopseudomonas palustris</i> BisA53 | WP_011662607.1 | 44.2  | 371 | 203 | 2  | 19  | 385 | 24  | 394 | 4.00E-95  | 302  | 95  |
|      | <i>Chelatococcus sambhunathii</i>        | WP_055457858.1 | 47.29 | 332 | 171 | 3  | 24  | 351 | 29  | 360 | 2.00E-86  | 282  | 85  |
|      | <i>Chelatococcus daeguensis</i>          | WP_063187161.1 | 47.29 | 332 | 171 | 3  | 24  | 351 | 29  | 360 | 2.00E-86  | 282  | 85  |
|      | <i>Methylocapsa aurea</i>                | WP_051953209.1 | 41.37 | 336 | 193 | 2  | 7   | 338 | 18  | 353 | 2.00E-77  | 257  | 86  |
|      | <i>Azorhizobium caulinodans</i> ORS 571  | WP_012169155.1 | 43.93 | 321 | 177 | 2  | 20  | 337 | 390 | 710 | 5.00E-75  | 261  | 82  |

|      |                                           |                |       |     |     |    |    |     |     |     |           |     |    |
|------|-------------------------------------------|----------------|-------|-----|-----|----|----|-----|-----|-----|-----------|-----|----|
|      | <i>Methyloferula stellata</i>             | WP_020176989.1 | 38.73 | 346 | 207 | 3  | 25 | 365 | 50  | 395 | 9.00E-73  | 245 | 88 |
|      | <i>Azorhizobium doebereineriae</i>        | WP_051357059.1 | 43.91 | 312 | 172 | 2  | 25 | 333 | 430 | 741 | 1.00E-71  | 252 | 80 |
| MotB | <i>Rhodopseudomonas palustris</i> BisB18  | WP_011471576.1 | 46.43 | 448 | 209 | 12 | 2  | 445 | 3   | 423 | 5.00E-106 | 333 | 99 |
|      | <i>Tardiphaga</i> sp. OK245               | SEH76075.1     | 45.55 | 461 | 198 | 14 | 7  | 441 | 8   | 441 | 6.00E-106 | 334 | 98 |
|      | <i>Tardiphaga</i> sp. Vaf07               | WP_068729876.1 | 44.54 | 458 | 207 | 11 | 7  | 441 | 8   | 441 | 5.00E-105 | 332 | 98 |
|      | <i>Methylobacterium aquaticum</i>         | WP_060848203.1 | 42.92 | 445 | 238 | 6  | 1  | 441 | 1   | 433 | 1.00E-98  | 315 | 99 |
|      | <i>Methylobacterium</i> sp. ap11          | SEP39975.1     | 43.15 | 445 | 241 | 6  | 1  | 441 | 1   | 437 | 3.00E-98  | 314 | 99 |
|      | <i>Polymorphum gilvum</i> SL003B-26A1     | WP_013654608.1 | 43.65 | 449 | 214 | 10 | 7  | 442 | 9   | 431 | 4.00E-98  | 313 | 98 |
|      | <i>Methylobacterium variabile</i>         | WP_048442237.1 | 42.83 | 453 | 222 | 12 | 6  | 441 | 7   | 439 | 2.00E-97  | 312 | 98 |
|      | <i>Methylobacterium aquaticum</i>         | WP_048463748.1 | 42.76 | 449 | 239 | 9  | 1  | 441 | 1   | 439 | 2.00E-97  | 312 | 99 |
|      | <i>Microvirga massiliensis</i>            | WP_046866642.1 | 42.99 | 442 | 221 | 9  | 6  | 442 | 7   | 422 | 2.00E-97  | 311 | 98 |
|      | <i>Phyllobacterium</i> sp. YR531          | WP_008121293.1 | 40.62 | 453 | 204 | 10 | 3  | 441 | 6   | 407 | 3.00E-97  | 310 | 99 |
| FliF | <i>Rhodopseudomonas palustris</i> BisB18  | WP_011471574.1 | 65.99 | 544 | 182 | 1  | 13 | 553 | 1   | 544 | 0         | 719 | 98 |
|      | <i>Tardiphaga</i> sp. OK245               | SEH76103.1     | 64.84 | 546 | 186 | 3  | 13 | 552 | 1   | 546 | 0         | 713 | 98 |
|      | <i>Tardiphaga</i> sp. Vaf07               | WP_068729879.1 | 64.84 | 546 | 186 | 3  | 13 | 552 | 1   | 546 | 0         | 712 | 98 |
|      | <i>Rhodopseudomonas palustris</i> BisA53  | WP_011662604.1 | 65.51 | 548 | 174 | 2  | 13 | 551 | 1   | 542 | 0         | 708 | 97 |
|      | <i>Chelatococcus</i> sp. CO-6             | WP_019404749.1 | 57.46 | 543 | 229 | 1  | 13 | 553 | 1   | 543 | 0         | 616 | 98 |
|      | <i>Chelatococcus daeguensis</i>           | WP_063187202.1 | 57.27 | 543 | 230 | 1  | 13 | 553 | 1   | 543 | 0         | 610 | 98 |
|      | <i>Chelatococcus sambhunathii</i>         | WP_055457861.1 | 57.27 | 543 | 230 | 1  | 13 | 553 | 1   | 543 | 0         | 610 | 98 |
|      | <i>Microvirga guangxiensis</i>            | SCY06191.1     | 56.15 | 545 | 231 | 2  | 16 | 552 | 4   | 548 | 0         | 602 | 97 |
|      | <i>Methylobacterium brachiatum</i>        | SFJ50956.1     | 56.41 | 546 | 226 | 5  | 16 | 553 | 4   | 545 | 0         | 595 | 97 |
|      | <i>Methylobacterium</i> sp. Leaf108       | WP_056283382.1 | 55.3  | 557 | 233 | 3  | 13 | 553 | 1   | 557 | 0         | 593 | 98 |
| FliP | <i>Rhodopseudomonas palustris</i> BisA53  | WP_011662602.1 | 78.99 | 238 | 50  | 0  | 8  | 245 | 6   | 243 | 5.00E-126 | 370 | 97 |
|      | <i>Tardiphaga</i> sp. Vaf07               | WP_068729883.1 | 79.3  | 227 | 47  | 0  | 19 | 245 | 17  | 243 | 1.00E-123 | 364 | 92 |
|      | <i>Tardiphaga</i> sp. OK245               | SEH76131.1     | 79.3  | 227 | 47  | 0  | 19 | 245 | 18  | 244 | 8.00E-123 | 362 | 92 |
|      | <i>Rhodopseudomonas palustris</i> BisB18  | WP_011471572.1 | 79.46 | 224 | 46  | 0  | 22 | 245 | 24  | 247 | 6.00E-122 | 360 | 91 |
|      | <i>Methylobacterium platani</i> JCM 14648 | WP_048437206.1 | 77.13 | 223 | 51  | 0  | 23 | 245 | 34  | 256 | 5.00E-120 | 355 | 91 |
|      | <i>Methylobacterium extorquens</i> DM4    | WP_015821058.1 | 77.13 | 223 | 51  | 0  | 23 | 245 | 37  | 259 | 5.00E-120 | 355 | 91 |
|      | <i>Methylobacterium</i> sp. 174MFSHa1.1   | SFV15311.1     | 77.13 | 223 | 51  | 0  | 23 | 245 | 38  | 260 | 6.00E-120 | 355 | 91 |
|      | <i>Methylobacterium</i> sp. Leaf123       | WP_056194052.1 | 76.68 | 223 | 52  | 0  | 23 | 245 | 37  | 259 | 2.00E-119 | 354 | 91 |
|      | <i>Methylobacterium extorquens</i> CM4    | WP_012605699.1 | 76.68 | 223 | 52  | 0  | 23 | 245 | 37  | 259 | 3.00E-119 | 353 | 91 |
|      | <i>Methylobacterium extorquens</i> PA1    | WP_012252383.1 | 76.68 | 223 | 52  | 0  | 23 | 245 | 37  | 259 | 3.00E-119 | 353 | 91 |
| FliL | <i>Rhodopseudomonas palustris</i>         | WP_041800380.1 | 57.82 | 147 | 62  | 0  | 2  | 148 | 1   | 147 | 4.00E-54  | 179 | 99 |
|      | <i>Rhodopseudomonas palustris</i> BisA53  | ABJ05115.1     | 57.14 | 147 | 63  | 0  | 2  | 148 | 17  | 163 | 2.00E-53  | 178 | 99 |
|      | <i>Rhodopseudomonas palustris</i> BisB18  | WP_011471571.1 | 53.74 | 147 | 68  | 0  | 2  | 148 | 1   | 147 | 3.00E-51  | 172 | 99 |
|      | <i>Tardiphaga</i> sp. Vaf07               | WP_068730434.1 | 53.06 | 147 | 69  | 0  | 2  | 148 | 1   | 147 | 2.00E-50  | 170 | 99 |

|      |                                          |                |       |     |     |   |    |     |    |     |           |     |     |
|------|------------------------------------------|----------------|-------|-----|-----|---|----|-----|----|-----|-----------|-----|-----|
|      | <i>Tardiphaga</i> sp. OK245              | SEH76144.1     | 52.03 | 148 | 71  | 0 | 1  | 148 | 14 | 161 | 3.00E-49  | 167 | 100 |
|      | <i>Chelatococcus sambhunathii</i>        | WP_055457849.1 | 44.3  | 149 | 78  | 2 | 3  | 148 | 13 | 159 | 8.00E-39  | 140 | 99  |
|      | <i>Chelatococcus daeguensis</i>          | WP_063187171.1 | 43.62 | 149 | 79  | 2 | 3  | 148 | 13 | 159 | 1.00E-38  | 140 | 99  |
|      | <i>Polymorphum gilvum</i>                | WP_041376329.1 | 54.55 | 143 | 57  | 2 | 11 | 148 | 5  | 144 | 1.00E-36  | 134 | 93  |
|      | <i>Polymorphum gilvum</i> SL003B-26A1    | ADZ72304.1     | 52    | 150 | 64  | 2 | 4  | 148 | 23 | 169 | 2.00E-36  | 135 | 98  |
|      | <i>Chelatococcus</i> sp. CO-6            | WP_019402933.1 | 42.76 | 145 | 78  | 2 | 7  | 148 | 17 | 159 | 8.00E-36  | 133 | 96  |
| FlgH | <i>Rhodopseudomonas palustris</i> BisA53 | ABJ05114.1     | 55.95 | 227 | 100 | 0 | 5  | 231 | 8  | 234 | 1.00E-86  | 269 | 98  |
|      | <i>Tardiphaga</i> sp. Vaf07              | WP_068730435.1 | 53.25 | 231 | 108 | 0 | 1  | 231 | 1  | 231 | 3.00E-82  | 258 | 100 |
|      | <i>Tardiphaga</i> sp. OK245              | SEH76157.1     | 52.81 | 231 | 109 | 0 | 1  | 231 | 4  | 234 | 1.00E-81  | 256 | 100 |
|      | <i>Tardiphaga</i> sp. Vaf07              | AMH39574.1     | 53.74 | 227 | 105 | 0 | 5  | 231 | 8  | 234 | 2.00E-81  | 256 | 98  |
|      | <i>Bosea</i> sp. PAMC 26642              | WP_066617509.1 | 53.85 | 234 | 105 | 2 | 1  | 231 | 1  | 234 | 8.00E-78  | 246 | 100 |
|      | <i>Microvirga lotononidis</i>            | WP_009493113.1 | 51.29 | 232 | 112 | 1 | 1  | 231 | 1  | 232 | 2.00E-76  | 243 | 100 |
|      | <i>Methylobacterium brachiatum</i>       | SFJ51057.1     | 52.59 | 232 | 109 | 1 | 1  | 231 | 1  | 232 | 8.00E-75  | 239 | 100 |
|      | <i>Microvirga lupini</i>                 | WP_051454790.1 | 51.29 | 232 | 112 | 1 | 1  | 231 | 1  | 232 | 1.00E-74  | 238 | 100 |
|      | <i>Bosea vaviloviae</i>                  | WP_069688494.1 | 53.85 | 234 | 105 | 2 | 1  | 231 | 1  | 234 | 2.00E-74  | 238 | 100 |
|      | <i>Bosea</i> sp. Root381                 | WP_056798268.1 | 51.71 | 234 | 110 | 2 | 1  | 231 | 1  | 234 | 5.00E-74  | 236 | 100 |
| FlgI | <i>Tardiphaga</i> sp. Vaf07              | WP_068730436.1 | 72.85 | 361 | 87  | 1 | 16 | 376 | 16 | 365 | 0         | 530 | 96  |
|      | <i>Tardiphaga</i> sp. OK245              | SEH76185.1     | 72.93 | 362 | 86  | 2 | 16 | 376 | 17 | 367 | 0         | 530 | 96  |
|      | <i>Rhodopseudomonas palustris</i> BisA53 | ABJ05112.1     | 70.29 | 377 | 100 | 2 | 1  | 376 | 2  | 367 | 1.00E-179 | 516 | 100 |
|      | <i>Rhodopseudomonas palustris</i> BisB18 | ABD86663.1     | 71.35 | 377 | 96  | 2 | 1  | 376 | 2  | 367 | 8.00E-178 | 512 | 100 |
|      | <i>Methylobacterium</i> sp. Leaf117      | WP_056484894.1 | 65.42 | 373 | 118 | 2 | 4  | 376 | 7  | 368 | 4.00E-161 | 469 | 99  |
|      | <i>Methylobacterium</i> sp. Leaf113      | WP_056181387.1 | 65.15 | 373 | 119 | 2 | 4  | 376 | 7  | 368 | 1.00E-160 | 469 | 99  |
|      | <i>Rhizobiales bacterium</i> GAS113      | SDR61185.1     | 65.55 | 357 | 122 | 1 | 21 | 376 | 75 | 431 | 5.00E-160 | 469 | 95  |
|      | <i>Rhizobiales bacterium</i> GAS188      | SED39458.1     | 65.55 | 357 | 122 | 1 | 21 | 376 | 75 | 431 | 7.00E-160 | 469 | 95  |
|      | <i>Methyloferula stellata</i>            | WP_020176999.1 | 62.5  | 376 | 130 | 1 | 1  | 376 | 1  | 365 | 7.00E-160 | 466 | 100 |
|      | <i>Microvirga flocculans</i>             | WP_027316337.1 | 62.23 | 376 | 131 | 1 | 1  | 376 | 1  | 365 | 3.00E-159 | 464 | 100 |
| FlgA | <i>Rhodopseudomonas palustris</i> BisA53 | ABJ05111.1     | 57.53 | 146 | 61  | 1 | 30 | 174 | 16 | 161 | 5.00E-46  | 160 | 83  |
|      | <i>Rhodopseudomonas palustris</i>        | WP_041800376.1 | 59.85 | 132 | 53  | 0 | 43 | 174 | 12 | 143 | 6.00E-46  | 159 | 75  |
|      | <i>Tardiphaga</i> sp. Vaf07              | WP_068729887.1 | 52.9  | 155 | 71  | 1 | 22 | 174 | 4  | 158 | 3.00E-44  | 155 | 87  |
|      | <i>Tardiphaga</i> sp. OK245              | SEH76198.1     | 55.64 | 133 | 59  | 0 | 42 | 174 | 26 | 158 | 3.00E-42  | 150 | 76  |
|      | <i>Microvirga lotononidis</i>            | WP_009493116.1 | 45.95 | 148 | 80  | 0 | 24 | 171 | 4  | 151 | 6.00E-35  | 132 | 85  |
|      | <i>Methylosinus</i> sp. 3S-1             | WP_003613354.1 | 48.99 | 149 | 73  | 2 | 27 | 174 | 3  | 149 | 8.00E-35  | 131 | 85  |
|      | <i>Microvirga lupini</i>                 | WP_036353842.1 | 45.77 | 142 | 77  | 0 | 30 | 171 | 10 | 151 | 2.00E-34  | 130 | 81  |
|      | <i>Microvirga</i> sp. BSC39              | WP_036358817.1 | 46.15 | 143 | 77  | 0 | 29 | 171 | 9  | 151 | 5.00E-33  | 126 | 82  |
|      | <i>Microvirga guangxiensis</i>           | SCY06422.1     | 46.9  | 145 | 75  | 1 | 29 | 171 | 6  | 150 | 2.00E-32  | 125 | 82  |
|      | <i>Microvirga flocculans</i>             | WP_027316336.1 | 44.76 | 143 | 79  | 0 | 29 | 171 | 9  | 151 | 1.00E-31  | 123 | 82  |



|      |                                   |                |       |     |    |   |    |     |    |     |           |      |     |
|------|-----------------------------------|----------------|-------|-----|----|---|----|-----|----|-----|-----------|------|-----|
| FlgG | Rhodopseudomonas palustris BisA53 | WP_011662596.1 | 78.24 | 262 | 57 | 0 | 1  | 262 | 1  | 262 | 5.00E-152 | 437  | 100 |
|      | Rhodopseudomonas palustris BisB18 | WP_011471566.1 | 78.63 | 262 | 56 | 0 | 1  | 262 | 1  | 262 | 2.00E-151 | 436  | 100 |
|      | Tardiphaga sp. OK245              | SEH76213.1     | 74.43 | 262 | 67 | 0 | 1  | 262 | 1  | 262 | 4.00E-143 | 415  | 100 |
|      | Tardiphaga sp. Vaf07              | WP_068729889.1 | 74.05 | 262 | 68 | 0 | 1  | 262 | 1  | 262 | 2.00E-142 | 413  | 100 |
|      | Chelatococcus sambhunathii        | WP_055457853.1 | 72.9  | 262 | 71 | 0 | 1  | 262 | 1  | 262 | 1.00E-136 | 399  | 100 |
|      | Chelatococcus sp. CO-6            | WP_019402938.1 | 73.28 | 262 | 70 | 0 | 1  | 262 | 1  | 262 | 2.00E-136 | 398  | 100 |
|      | Salinarimonas rosea               | WP_029030032.1 | 72.14 | 262 | 73 | 0 | 1  | 262 | 1  | 262 | 1.00E-135 | 396  | 100 |
|      | Labrenzia alexandrii              | WP_055673361.1 | 66.79 | 262 | 87 | 0 | 1  | 262 | 1  | 262 | 9.00E-132 | 386  | 100 |
|      | Labrenzia alexandrii DFL-11       | WP_008197053.1 | 66.41 | 262 | 88 | 0 | 1  | 262 | 1  | 262 | 2.00E-131 | 385  | 100 |
|      | Microvirga lotononidis            | WP_009493117.1 | 69.08 | 262 | 81 | 0 | 1  | 262 | 1  | 262 | 6.00E-131 | 384  | 100 |
| FlIE | Rhodopseudomonas palustris BisB18 | WP_011471565.1 | 64.55 | 110 | 34 | 3 | 1  | 109 | 1  | 106 | 7.00E-31  | 117  | 100 |
|      | Rhodopseudomonas palustris BisA53 | WP_011662595.1 | 59.63 | 109 | 41 | 1 | 1  | 109 | 1  | 106 | 7.00E-30  | 114  | 100 |
|      | Tardiphaga sp. Vaf07              | WP_068729891.1 | 58.18 | 110 | 41 | 2 | 1  | 109 | 1  | 106 | 2.00E-29  | 113  | 100 |
|      | Microvirga ossetica               | ANY79425.1     | 69.57 | 69  | 21 | 0 | 41 | 109 | 41 | 109 | 7.00E-23  | 97.1 | 63  |
|      | Microvirga sp. BSC39              | WP_036358811.1 | 60.71 | 84  | 32 | 1 | 26 | 109 | 28 | 110 | 1.00E-22  | 96.3 | 77  |
|      | Methylobacterium brachiatum       | SFJ51193.1     | 59.09 | 88  | 32 | 1 | 22 | 109 | 27 | 110 | 1.00E-22  | 96.3 | 81  |
|      | Azorhizobium doebereineriae       | WP_029005584.1 | 50.43 | 117 | 42 | 3 | 1  | 109 | 1  | 109 | 7.00E-22  | 94.4 | 100 |
|      | Rhizobiales bacterium GAS188      | SED39315.1     | 48.62 | 109 | 54 | 1 | 1  | 109 | 1  | 107 | 8.00E-22  | 94   | 100 |
|      | Microvirga lupini                 | WP_036353848.1 | 65.22 | 69  | 24 | 0 | 41 | 109 | 41 | 109 | 2.00E-21  | 92.8 | 63  |
| FlgC | Rhizobium arenae                  | WP_075292484.1 | 47.75 | 111 | 55 | 2 | 1  | 109 | 1  | 110 | 2.00E-21  | 92.8 | 100 |
|      | Rhodopseudomonas palustris BisB18 | WP_011471564.1 | 73.72 | 137 | 36 | 0 | 1  | 137 | 1  | 137 | 5.00E-71  | 222  | 99  |
|      | Tardiphaga sp. OK245              | SEH76238.1     | 73.19 | 138 | 37 | 0 | 1  | 138 | 1  | 138 | 1.00E-70  | 221  | 100 |
|      | Tardiphaga sp. Vaf07              | WP_068730437.1 | 72.46 | 138 | 38 | 0 | 1  | 138 | 1  | 138 | 2.00E-70  | 220  | 100 |
|      | Bosea sp. Root381                 | WP_056798285.1 | 70.29 | 138 | 41 | 0 | 1  | 138 | 1  | 138 | 4.00E-67  | 212  | 100 |
|      | Bosea vaviloviae                  | WP_069688500.1 | 70.29 | 138 | 41 | 0 | 1  | 138 | 1  | 138 | 8.00E-67  | 211  | 100 |
|      | Bosea sp. PAMC 26642              | WP_066617484.1 | 69.57 | 138 | 42 | 0 | 1  | 138 | 1  | 138 | 7.00E-65  | 206  | 100 |
|      | Hyphomicrobium nitratorans NL23   | WP_023786219.1 | 71.01 | 138 | 40 | 0 | 1  | 138 | 1  | 138 | 9.00E-65  | 206  | 100 |
|      | Methylocella silvestris BL2       | WP_012589078.1 | 70.29 | 138 | 41 | 0 | 1  | 138 | 1  | 138 | 1.00E-64  | 206  | 100 |
|      | Bosea sp. RAC05                   | WP_069053030.1 | 66.67 | 138 | 46 | 0 | 1  | 138 | 1  | 138 | 1.00E-64  | 205  | 100 |
| FlgB | Aurantimonas sp. USBA 369         | WP_078707251.1 | 68.12 | 138 | 44 | 0 | 1  | 138 | 1  | 138 | 4.00E-64  | 204  | 100 |
|      | Rhodopseudomonas palustris BisB18 | WP_011471563.1 | 61.6  | 125 | 47 | 1 | 8  | 132 | 1  | 124 | 2.00E-51  | 171  | 94  |
|      | Rhodopseudomonas palustris BisA53 | ABJ05107.1     | 59.06 | 127 | 51 | 1 | 8  | 133 | 8  | 134 | 5.00E-50  | 168  | 95  |
|      | Rhodopseudomonas palustris        | WP_041800375.1 | 58.27 | 127 | 52 | 1 | 8  | 133 | 1  | 127 | 2.00E-49  | 166  | 95  |
|      | Tardiphaga sp. Vaf07              | WP_068729893.1 | 56.35 | 126 | 54 | 1 | 8  | 133 | 1  | 125 | 2.00E-48  | 164  | 95  |
|      | Microvirga lotononidis            | EIM24941.1     | 54.33 | 127 | 58 | 0 | 7  | 133 | 24 | 150 | 1.00E-44  | 155  | 95  |
|      | Microvirga lotononidis            | WP_040639265.1 | 53.54 | 127 | 59 | 0 | 7  | 133 | 1  | 127 | 1.00E-44  | 154  | 95  |

|      |                                          |                |       |     |     |   |    |     |    |     |           |     |    |
|------|------------------------------------------|----------------|-------|-----|-----|---|----|-----|----|-----|-----------|-----|----|
|      | <i>Microvirga flocculans</i>             | WP_051435267.1 | 55.12 | 127 | 57  | 0 | 7  | 133 | 12 | 138 | 3.00E-44  | 153 | 95 |
|      | <i>Microvirga ossetica</i>               | ANY79423.1     | 55.12 | 127 | 57  | 0 | 7  | 133 | 12 | 138 | 1.00E-43  | 152 | 95 |
|      | <i>Microvirga guangxiensis</i>           | SCY06584.1     | 54.84 | 124 | 56  | 0 | 10 | 133 | 4  | 127 | 2.00E-43  | 151 | 93 |
|      | <i>Chelatococcus sambhunathii</i>        | WP_055457856.1 | 53.66 | 123 | 57  | 0 | 10 | 132 | 3  | 125 | 5.00E-43  | 150 | 92 |
| FlhB | <i>Tardiphaga</i> sp. Vaf07              | WP_068729895.1 | 62.61 | 353 | 132 | 0 | 1  | 353 | 1  | 353 | 2.00E-161 | 469 | 98 |
|      | <i>Tardiphaga</i> sp. OK245              | SEH76264.1     | 62.32 | 353 | 133 | 0 | 1  | 353 | 1  | 353 | 5.00E-161 | 468 | 98 |
|      | <i>Rhodopseudomonas palustris</i> BisA53 | WP_011662592.1 | 61.76 | 353 | 135 | 0 | 1  | 353 | 1  | 353 | 7.00E-161 | 468 | 98 |
|      | <i>Rhodopseudomonas palustris</i> BisB18 | WP_011471562.1 | 62.04 | 353 | 134 | 0 | 1  | 353 | 1  | 353 | 3.00E-159 | 464 | 98 |
|      | <i>Methylobacterium</i> sp. WSM2598      | WP_018260418.1 | 60.86 | 350 | 135 | 2 | 1  | 349 | 1  | 349 | 1.00E-146 | 431 | 97 |
|      | <i>Pannonibacter phragmitetus</i>        | WP_019963519.1 | 55.34 | 356 | 159 | 0 | 1  | 356 | 1  | 356 | 6.00E-146 | 430 | 99 |
|      | <i>Methylobacterium</i> sp. 4-46         | WP_012333023.1 | 60.57 | 350 | 136 | 2 | 1  | 349 | 1  | 349 | 6.00E-146 | 430 | 97 |
|      | <i>Labrenzia</i> sp. OB1                 | WP_068418034.1 | 56.21 | 354 | 155 | 0 | 1  | 354 | 1  | 354 | 7.00E-146 | 430 | 98 |
|      | <i>Pannonibacter phragmitetus</i>        | WP_050474412.1 | 54.78 | 356 | 161 | 0 | 1  | 356 | 1  | 356 | 5.00E-145 | 427 | 99 |
|      | <i>Pannonibacter indicus</i>             | WP_055457260.1 | 55.06 | 356 | 160 | 0 | 1  | 356 | 1  | 356 | 1.00E-144 | 427 | 99 |
| FlhG | <i>Tardiphaga</i> sp. Vaf07              | WP_068729897.1 | 64.71 | 340 | 118 | 1 | 8  | 345 | 5  | 344 | 1.00E-161 | 469 | 98 |
|      | <i>Tardiphaga</i> sp. OK245              | SEH76281.1     | 64.71 | 340 | 118 | 1 | 8  | 345 | 5  | 344 | 2.00E-161 | 468 | 98 |
|      | <i>Rhodopseudomonas palustris</i> BisA53 | WP_011662591.1 | 63.72 | 339 | 122 | 1 | 8  | 345 | 5  | 343 | 8.00E-161 | 466 | 98 |
|      | <i>Rhodopseudomonas palustris</i> BisB18 | WP_011471561.1 | 64.94 | 328 | 115 | 0 | 18 | 345 | 16 | 343 | 2.00E-156 | 455 | 95 |
|      | <i>Chelatococcus sambhunathii</i>        | WP_055457845.1 | 63.31 | 338 | 123 | 1 | 9  | 346 | 13 | 349 | 2.00E-153 | 448 | 98 |
|      | <i>Chelatococcus</i> sp. CO-6            | WP_019402928.1 | 63.02 | 338 | 124 | 1 | 9  | 346 | 14 | 350 | 9.00E-153 | 446 | 98 |
|      | <i>Afifella pfennigii</i>                | WP_051630248.1 | 60.67 | 328 | 129 | 0 | 15 | 342 | 12 | 339 | 2.00E-150 | 440 | 95 |
|      | <i>Microvirga</i> sp. BSC39              | WP_036358842.1 | 58.06 | 341 | 143 | 0 | 5  | 345 | 2  | 342 | 3.00E-146 | 429 | 99 |
|      | <i>Microvirga lupini</i>                 | WP_036353817.1 | 58.06 | 341 | 143 | 0 | 5  | 345 | 2  | 342 | 4.00E-146 | 429 | 99 |
|      | <i>Pseudoxanthobacter soli</i> DSM 19599 | WP_073626753.1 | 58.95 | 324 | 133 | 0 | 18 | 341 | 15 | 338 | 6.00E-146 | 429 | 94 |
| FlhN | <i>Tardiphaga</i> sp. OK245              | SEH76298.1     | 66.94 | 124 | 34  | 1 | 1  | 117 | 1  | 124 | 1.00E-47  | 161 | 94 |
|      | <i>Rhodopseudomonas palustris</i> BisA53 | WP_011662590.1 | 64.52 | 124 | 37  | 1 | 1  | 117 | 1  | 124 | 2.00E-46  | 158 | 94 |
|      | <i>Tardiphaga</i> sp. Vaf07              | WP_068729899.1 | 66.13 | 124 | 33  | 2 | 1  | 117 | 1  | 122 | 3.00E-46  | 158 | 94 |
|      | <i>Methylobacterium brachiatum</i>       | SFJ51806.1     | 69.91 | 113 | 34  | 0 | 6  | 118 | 13 | 125 | 2.00E-45  | 155 | 91 |
|      | <i>Methylobacterium phyllosphaerae</i>   | WP_043348558.1 | 66.39 | 119 | 38  | 1 | 2  | 118 | 5  | 123 | 9.00E-44  | 151 | 94 |
|      | <i>Microvirga flocculans</i>             | WP_027316349.1 | 79.79 | 94  | 19  | 0 | 25 | 118 | 11 | 104 | 1.00E-43  | 150 | 76 |
|      | <i>Rhodopseudomonas palustris</i> BisB18 | WP_011471560.1 | 63.71 | 124 | 38  | 2 | 1  | 117 | 1  | 124 | 1.00E-43  | 151 | 94 |
|      | <i>Microvirga lotononidis</i>            | EIM24921.1     | 66.1  | 118 | 35  | 1 | 1  | 118 | 1  | 113 | 1.00E-43  | 151 | 95 |
|      | <i>Methylobacterium oryzae</i> CBMB20    | AIQ89866.1     | 67.24 | 116 | 36  | 1 | 5  | 118 | 1  | 116 | 2.00E-43  | 150 | 92 |
|      | <i>Microvirga ossetica</i>               | ANY79440.1     | 67.26 | 113 | 36  | 1 | 7  | 118 | 5  | 117 | 3.00E-43  | 150 | 90 |
| FlhM | <i>Rhodopseudomonas palustris</i> BisB18 | WP_011471558.1 | 56.27 | 311 | 136 | 0 | 3  | 313 | 1  | 311 | 9.00E-133 | 393 | 99 |
|      | <i>Tardiphaga</i> sp. OK245              | SEH76328.1     | 56.27 | 311 | 136 | 0 | 3  | 313 | 1  | 311 | 5.00E-130 | 385 | 99 |



|      |                                          |                |       |     |     |   |    |     |    |     |           |     |    |
|------|------------------------------------------|----------------|-------|-----|-----|---|----|-----|----|-----|-----------|-----|----|
|      | <i>Tardiphaga</i> sp. Vaf07              | WP_068729903.1 | 56.27 | 311 | 136 | 0 | 3  | 313 | 1  | 311 | 7.00E-130 | 385 | 99 |
|      | <i>Rhodopseudomonas palustris</i>        | WP_041799496.1 | 55.95 | 311 | 137 | 0 | 3  | 313 | 1  | 311 | 1.00E-129 | 385 | 99 |
|      | <i>Microvirga vignae</i>                 | WP_047187614.1 | 53.69 | 298 | 138 | 0 | 16 | 313 | 12 | 309 | 9.00E-123 | 367 | 95 |
|      | <i>Salinarimonas rosea</i>               | WP_029031688.1 | 55.85 | 299 | 132 | 0 | 14 | 312 | 15 | 313 | 1.00E-121 | 364 | 96 |
|      | <i>Microvirga guangxiensis</i>           | SCY05701.1     | 52.68 | 298 | 141 | 0 | 16 | 313 | 12 | 309 | 4.00E-120 | 360 | 95 |
|      | <i>Microvirga ossetica</i>               | ANY79442.1     | 52.01 | 298 | 143 | 0 | 16 | 313 | 12 | 309 | 4.00E-119 | 358 | 95 |
|      | <i>Chelatococcus</i> sp. CO-6            | WP_019402925.1 | 54.73 | 296 | 134 | 0 | 18 | 313 | 17 | 312 | 6.00E-119 | 357 | 95 |
|      | <i>Chelatococcus daeguensis</i>          | WP_055457947.1 | 54.39 | 296 | 135 | 0 | 18 | 313 | 13 | 308 | 2.00E-118 | 356 | 95 |
| MotA | <i>Tardiphaga</i> sp. Vaf07              | AMH39587.1     | 74.14 | 290 | 75  | 0 | 57 | 346 | 6  | 295 | 1.00E-146 | 429 | 83 |
|      | <i>Tardiphaga</i> sp. OK245              | SEH76342.1     | 74.14 | 290 | 75  | 0 | 57 | 346 | 6  | 295 | 1.00E-146 | 429 | 83 |
|      | <i>Phyllobacterium</i> sp. OV277         | SDP79884.1     | 72.04 | 279 | 78  | 0 | 55 | 333 | 4  | 282 | 6.00E-144 | 422 | 80 |
|      | <i>Ochrobactrum intermedium</i> LMG 3301 | EEQ94082.1     | 67.67 | 300 | 96  | 1 | 34 | 333 | 22 | 320 | 3.00E-143 | 421 | 86 |
|      | <i>Ochrobactrum anthropi</i>             | WP_061347648.1 | 70.14 | 278 | 83  | 0 | 56 | 333 | 5  | 282 | 2.00E-141 | 416 | 80 |
|      | <i>Ochrobactrum anthropi</i> ATCC 49188  | WP_010660722.1 | 70.14 | 278 | 83  | 0 | 56 | 333 | 5  | 282 | 2.00E-141 | 415 | 80 |
|      | <i>Ochrobactrum intermedium</i> M86      | WP_006471432.1 | 70.14 | 278 | 83  | 0 | 56 | 333 | 5  | 282 | 3.00E-141 | 415 | 80 |
|      | <i>Ochrobactrum</i> sp. EGD-AQ16         | WP_021585290.1 | 70.14 | 278 | 83  | 0 | 56 | 333 | 5  | 282 | 4.00E-141 | 414 | 80 |
|      | <i>Paramesorhizobium deserti</i>         | WP_068882774.1 | 70.76 | 277 | 81  | 0 | 56 | 332 | 5  | 281 | 6.00E-141 | 414 | 79 |
|      | <i>Ochrobactrum</i> sp. P6BS-III         | WP_078340856.1 | 70.5  | 278 | 82  | 0 | 56 | 333 | 5  | 282 | 8.00E-141 | 414 | 80 |
| FliI | <i>Rhodopseudomonas palustris</i> BisA53 | WP_011662584.1 | 70.82 | 377 | 110 | 0 | 1  | 377 | 63 | 439 | 0         | 560 | 99 |
|      | <i>Tardiphaga</i> sp. OK245              | SEH76381.1     | 70.03 | 377 | 113 | 0 | 1  | 377 | 63 | 439 | 0         | 559 | 99 |
|      | <i>Tardiphaga</i> sp. Vaf07              | WP_068729909.1 | 70.03 | 377 | 113 | 0 | 1  | 377 | 63 | 439 | 0         | 559 | 99 |
|      | <i>Rhodopseudomonas palustris</i> BisB18 | WP_011471555.1 | 70.56 | 377 | 111 | 0 | 1  | 377 | 63 | 439 | 0         | 557 | 99 |
|      | <i>Chelatococcus</i> sp. CO-6            | WP_019402921.1 | 71.35 | 377 | 108 | 0 | 1  | 377 | 63 | 439 | 0         | 548 | 99 |
|      | <i>Chelatococcus sambhunathii</i>        | WP_055457840.1 | 71.09 | 377 | 109 | 0 | 1  | 377 | 63 | 439 | 0         | 548 | 99 |
|      | <i>Methyloferula stellata</i>            | WP_020177015.1 | 69.76 | 377 | 114 | 0 | 1  | 377 | 63 | 439 | 0         | 543 | 99 |
|      | <i>Pleomorphomonas oryzae</i>            | WP_026790449.1 | 69.5  | 377 | 115 | 0 | 1  | 377 | 66 | 442 | 0         | 543 | 99 |
|      | <i>Hyphomicrobium nitratorans</i>        | WP_051388668.1 | 71.51 | 372 | 106 | 0 | 1  | 372 | 57 | 428 | 0         | 541 | 98 |
|      | <i>Hyphomicrobium nitratorans</i> NL23   | AHB47756.1     | 71.51 | 372 | 106 | 0 | 1  | 372 | 82 | 453 | 0         | 541 | 98 |
