# Supplementary material for: Phylogenomic Analyses of Bradyrhizobium Reveal Uneven Distribution of the Lateral and Subpolar Flagellar Systems, Which Extends to Rhizobiales
Source: Microorganisms. 2019 Feb 13;7(2):50. doi: 10.3390/microorganisms7020050 (PMC6406911; doi:10.3390/microorganisms7020050)
Supplement: Supplementary file 1 [file microorganisms-07-00050-s001.zip › Supplementary_Data_S1.xlsx]

## Sheet: GBDP_comparisons_Bradyrhizobium
Supplementary Data S1. GBDP and ANIb comparisons of Bradyrhizobium genomes.
		Formula 1				Formula 2				Formula 3
Query genome	Reference genome	DDH	Model C.I.	Distance	Prob. DDH >= 70%	DDH	Model C.I.	Distance	Prob. DDH >= 70%	DDH	Model C.I.	Distance	Prob. DDH >= 70%	G+C difference
Bradyrhizobium_sp_BTAi1	Bradyrhizobium_diazoefficiens_NK6	19.8	[16.6 - 23.4%]	0.7175	0	23.2	[20.9 - 25.6%]	0.1889	0	19.4	[16.6 - 22.4%]	0.7709	0	1.22
Bradyrhizobium_sp_BTAi1	Bradyrhizobium arachidis LMG 26795	19.8	[16.6 - 23.4%]	0.7178	0	23.2	[20.9 - 25.6%]	0.1887	0	19.3	[16.6 - 22.4%]	0.771	0	1.29
Bradyrhizobium_sp_BTAi1	Bradyrhizobium canariense GAS369	16.9	[13.9 - 20.4%]	0.8063	0	21.8	[19.6 - 24.3%]	0.2011	0	16.8	[14.2 - 19.8%]	0.8452	0	4.02
Bradyrhizobium_sp_BTAi1	Bradyrhizobium daqingense CGMCC 1.10947	20.6	[17.4 - 24.2%]	0.6964	0	22.8	[20.6 - 25.3%]	0.1917	0	20	[17.2 - 23%]	0.7546	0	1.19
Bradyrhizobium_sp_BTAi1	Bradyrhizobium erythrophlei GAS138	16.7	[13.7 - 20.2%]	0.8138	0	22.3	[20 - 24.7%]	0.1969	0	16.7	[14.1 - 19.6%]	0.8505	0	3.51
Bradyrhizobium_sp_BTAi1	Bradyrhizobium erythrophlei GAS242	18.1	[15 - 21.7%]	0.7669	0	22.3	[20 - 24.7%]	0.1969	0	17.9	[15.2 - 20.9%]	0.8128	0	2.99
Bradyrhizobium_sp_BTAi1	Bradyrhizobium erythrophlei GAS401	16.3	[13.3 - 19.8%]	0.8294	0	21.9	[19.6 - 24.3%]	0.2002	0	16.3	[13.7 - 19.2%]	0.8635	0	3.76
Bradyrhizobium_sp_BTAi1	Bradyrhizobium erythrophlei MT12	19.5	[16.3 - 23.1%]	0.7252	0	23.1	[20.8 - 25.5%]	0.1898	0	19.1	[16.4 - 22.1%]	0.7773	0	1.1
Bradyrhizobium_sp_BTAi1	Bradyrhizobium huanghuaihaiense CGMCC 1.10948	20.5	[17.3 - 24.1%]	0.6992	0	23	[20.7 - 25.5%]	0.1903	0	19.9	[17.2 - 23%]	0.7565	0	0.98
Bradyrhizobium_sp_BTAi1	Bradyrhizobium lablabi GAS522	18.5	[15.3 - 22%]	0.756	0	22.7	[20.4 - 25.1%]	0.1932	0	18.2	[15.5 - 21.2%]	0.8031	0	2.58
Bradyrhizobium_sp_BTAi1	Bradyrhizobium ottawaense GAS524	18.4	[15.3 - 22%]	0.7565	0	22.7	[20.4 - 25.1%]	0.1933	0	18.2	[15.5 - 21.2%]	0.8036	0	2.61
Bradyrhizobium_sp_BTAi1	Bradyrhizobium sp. CF659	21.3	[18.1 - 24.9%]	0.6782	0	23.1	[20.8 - 25.6%]	0.1894	0	20.6	[17.8 - 23.7%]	0.7391	0	0.4
Bradyrhizobium_sp_BTAi1	Bradyrhizobium sp. ERR11	20	[16.8 - 23.6%]	0.7128	0	22.9	[20.6 - 25.4%]	0.1911	0	19.5	[16.8 - 22.5%]	0.7677	0	1.69
Bradyrhizobium_sp_BTAi1	Bradyrhizobium sp. Gha	19.1	[16 - 22.7%]	0.7363	0	22.6	[20.3 - 25%]	0.194	0	18.7	[16.1 - 21.8%]	0.7874	0	2.05
Bradyrhizobium_sp_BTAi1	Bradyrhizobium sp. Ghvi	19.6	[16.4 - 23.2%]	0.7224	0	22.6	[20.3 - 25.1%]	0.1937	0	19.2	[16.5 - 22.2%]	0.7762	0	1.89
Bradyrhizobium_sp_BTAi1	Bradyrhizobium sp. OK095	20.5	[17.3 - 24.1%]	0.698	0	22.6	[20.3 - 25%]	0.1942	0	19.9	[17.2 - 22.9%]	0.7566	0	1.03
Bradyrhizobium_sp_BTAi1	Bradyrhizobium sp. R5	19.4	[16.2 - 23%]	0.7281	0	23.3	[21 - 25.8%]	0.1875	0	19	[16.4 - 22.1%]	0.7791	0	1.27
Bradyrhizobium_sp_BTAi1	Bradyrhizobium sp. Rc2d	19.5	[16.3 - 23.1%]	0.7256	0	23.1	[20.8 - 25.5%]	0.1896	0	19.1	[16.4 - 22.1%]	0.7776	0	2.09
Bradyrhizobium_sp_BTAi1	Bradyrhizobium sp. Rc3b	20.4	[17.2 - 24%]	0.7003	0	22.9	[20.6 - 25.4%]	0.1909	0	19.9	[17.1 - 22.9%]	0.7575	0	1.25
Bradyrhizobium_sp_BTAi1	Bradyrhizobium yuanmingense CCBAU 10071	20.3	[17.1 - 23.9%]	0.7041	0	23.1	[20.8 - 25.5%]	0.1896	0	19.8	[17 - 22.8%]	0.7602	0	1.15
Bradyrhizobium_sp_BTAi1	Bradyrhizobium yuanmingense CGMCC 1.3531	20.3	[17.1 - 23.9%]	0.7046	0	23.1	[20.8 - 25.5%]	0.1896	0	19.7	[17 - 22.8%]	0.7606	0	1.15
Bradyrhizobium_sp_BTAi1	Mesorhizobium_ciceri_WSM1271_OUTGROUP	13.2	[10.5 - 16.5%]	0.9621	0	18.5	[16.3 - 20.9%]	0.2376	0	13.5	[11.1 - 16.3%]	0.9711	0	2.36
Bradyrhizobium_sp_BTAi1	Bradyrhizobium_diazoefficiens_SEMIA_5080	20.3	[17.1 - 23.9%]	0.7041	0	23.3	[21 - 25.7%]	0.1879	0	19.8	[17.1 - 22.8%]	0.7597	0	0.94
Bradyrhizobium_sp_BTAi1	Bradyrhizobium_diazoefficiens_USDA_110	20.3	[17.2 - 24%]	0.7023	0	23.2	[20.9 - 25.6%]	0.189	0	19.8	[17.1 - 22.9%]	0.7586	0	0.86
Bradyrhizobium_sp_BTAi1	Bradyrhizobium_elkanii_587	18	[14.9 - 21.5%]	0.771	0	23.9	[21.6 - 26.3%]	0.1831	0	17.9	[15.2 - 20.8%]	0.813	0	1.28
Bradyrhizobium_sp_BTAi1	Bradyrhizobium_elkanii_BLY3-8	19.2	[16.1 - 22.8%]	0.7325	0	23.4	[21.1 - 25.8%]	0.1873	0	18.9	[16.2 - 21.9%]	0.7826	0	1.11
Bradyrhizobium_sp_BTAi1	Bradyrhizobium_elkanii_BLY6-1	19.3	[16.1 - 22.8%]	0.7323	0	23.3	[21.1 - 25.8%]	0.1873	0	18.9	[16.2 - 21.9%]	0.7825	0	1.11
Bradyrhizobium_sp_BTAi1	Bradyrhizobium_elkanii_CCBAU_05737	18.7	[15.6 - 22.3%]	0.749	0	23.6	[21.3 - 26.1%]	0.185	0	18.5	[15.8 - 21.5%]	0.7955	0	1.41
Bradyrhizobium_sp_BTAi1	Bradyrhizobium_elkanii_CCBAU_43297	19.1	[15.9 - 22.6%]	0.7378	0	23.5	[21.2 - 26%]	0.1858	0	18.8	[16.1 - 21.8%]	0.7865	0	1.17
Bradyrhizobium_sp_BTAi1	Bradyrhizobium_elkanii_UASWS1015	20.3	[17.1 - 23.9%]	0.7031	0	23.1	[20.8 - 25.5%]	0.1895	0	19.8	[17.1 - 22.8%]	0.7593	0	0.28
Bradyrhizobium_sp_BTAi1	Bradyrhizobium_elkanii_USDA_76	19.3	[16.1 - 22.9%]	0.7318	0	23.4	[21.1 - 25.8%]	0.1872	0	18.9	[16.3 - 22%]	0.782	0	1.2
Bradyrhizobium_sp_BTAi1	Bradyrhizobium_elkanii_USDA_94	19.1	[15.9 - 22.7%]	0.7377	0	23.5	[21.2 - 26%]	0.1861	0	18.8	[16.1 - 21.8%]	0.7865	0	1.18
Bradyrhizobium_sp_BTAi1	Bradyrhizobium_elkanii_USDA_3254	19.2	[16.1 - 22.8%]	0.7334	0	23.4	[21.1 - 25.8%]	0.1871	0	18.9	[16.2 - 21.9%]	0.7833	0	1.14
Bradyrhizobium_sp_BTAi1	Bradyrhizobium_elkanii_USDA_3259	19.4	[16.2 - 23%]	0.729	0	23.4	[21.1 - 25.8%]	0.1873	0	19	[16.3 - 22%]	0.7797	0	1.01
Bradyrhizobium_sp_BTAi1	Bradyrhizobium_elkanii_WSM1741	18.1	[15.1 - 21.7%]	0.7656	0	22.1	[19.8 - 24.5%]	0.1985	0	17.9	[15.2 - 20.9%]	0.8121	0	2.83
Bradyrhizobium_sp_BTAi1	Bradyrhizobium_elkanii_WSM2783	18.1	[15 - 21.6%]	0.7672	0	23	[20.7 - 25.5%]	0.1902	0	17.9	[15.3 - 20.9%]	0.8115	0	2.57
Bradyrhizobium_sp_BTAi1	Bradyrhizobium_embrapense_SEMIA_6208	20	[16.8 - 23.6%]	0.7117	0	23	[20.7 - 25.5%]	0.19	0	19.5	[16.8 - 22.6%]	0.7665	0	0.94
Bradyrhizobium_sp_BTAi1	Bradyrhizobium_icense_LMTR_13	18.2	[15.1 - 21.8%]	0.7628	0	22.1	[19.8 - 24.5%]	0.1985	0	18	[15.3 - 21%]	0.8099	0	2.89
Bradyrhizobium_sp_BTAi1	Bradyrhizobium_japonicum_22	21	[17.8 - 24.6%]	0.6855	0	23.1	[20.8 - 25.6%]	0.1893	0	20.4	[17.6 - 23.4%]	0.7451	0	0.39
Bradyrhizobium_sp_BTAi1	Bradyrhizobium_japonicum_CCBA_15517	19.3	[16.2 - 22.9%]	0.7304	0	23.1	[20.9 - 25.6%]	0.1891	0	19	[16.3 - 22%]	0.7814	0	1.52
Bradyrhizobium_sp_BTAi1	Bradyrhizobium_japonicum_CCBAU_15354	19.2	[16.1 - 22.8%]	0.7327	0	23.1	[20.8 - 25.6%]	0.1892	0	18.9	[16.2 - 21.9%]	0.7833	0	1.59
Bradyrhizobium_sp_BTAi1	Bradyrhizobium_japonicum_CCBAU_15618	19.1	[16 - 22.7%]	0.7363	0	23.3	[21 - 25.7%]	0.188	0	18.8	[16.1 - 21.8%]	0.7858	0	1.5
Bradyrhizobium_sp_BTAi1	Bradyrhizobium_japonicum_CCBAU_25435	19.4	[16.3 - 23%]	0.7274	0	23.2	[20.9 - 25.7%]	0.1886	0	19.1	[16.4 - 22.1%]	0.7788	0	1.44
Bradyrhizobium_sp_BTAi1	Bradyrhizobium_japonicum_CCBAU_83623	19.3	[16.1 - 22.8%]	0.7324	0	23.1	[20.9 - 25.6%]	0.1891	0	18.9	[16.2 - 21.9%]	0.783	0	1.61
Bradyrhizobium_sp_BTAi1	Bradyrhizobium_japonicum_E109	19.8	[16.7 - 23.4%]	0.7159	0	23.1	[20.8 - 25.5%]	0.1897	0	19.4	[16.7 - 22.4%]	0.7698	0	1.26
Bradyrhizobium_sp_BTAi1	Bradyrhizobium_japonicum_FN1	19.8	[16.7 - 23.4%]	0.7162	0	23.1	[20.8 - 25.5%]	0.1897	0	19.4	[16.7 - 22.4%]	0.7701	0	1.23
Bradyrhizobium_sp_BTAi1	Bradyrhizobium_japonicum_in8p8	19.5	[16.4 - 23.1%]	0.7245	0	22.7	[20.4 - 25.1%]	0.1933	0	19.1	[16.4 - 22.1%]	0.7777	0	1.13
Bradyrhizobium_sp_BTAi1	Bradyrhizobium_japonicum_Is-1	20.3	[17.1 - 23.9%]	0.7033	0	23.3	[21 - 25.7%]	0.1878	0	19.8	[17.1 - 22.8%]	0.7591	0	0.93
Bradyrhizobium_sp_BTAi1	Bradyrhizobium_japonicum_is5	19.5	[16.4 - 23.1%]	0.7246	0	22.6	[20.4 - 25.1%]	0.1935	0	19.1	[16.4 - 22.1%]	0.7779	0	1.13
Bradyrhizobium_sp_BTAi1	Bradyrhizobium_japonicum_Is-34	19.5	[16.4 - 23.1%]	0.7247	0	23	[20.7 - 25.4%]	0.1905	0	19.1	[16.4 - 22.1%]	0.7772	0	1.87
Bradyrhizobium_sp_BTAi1	Bradyrhizobium_japonicum_SEMIA_5079	19.6	[16.5 - 23.2%]	0.7213	0	23.1	[20.8 - 25.5%]	0.1897	0	19.2	[16.5 - 22.3%]	0.7742	0	1.38
Bradyrhizobium_sp_BTAi1	Bradyrhizobium_japonicum_USDA_4	20.3	[17.1 - 23.9%]	0.7032	0	22.9	[20.7 - 25.4%]	0.1908	0	19.8	[17.1 - 22.8%]	0.7599	0	1.24
Bradyrhizobium_sp_BTAi1	Bradyrhizobium_japonicum_USDA_6	19.8	[16.6 - 23.4%]	0.7167	0	23.1	[20.8 - 25.5%]	0.1895	0	19.4	[16.7 - 22.4%]	0.7704	0	1.25
Bradyrhizobium_sp_BTAi1	Bradyrhizobium_japonicum_USDA_38	19.9	[16.7 - 23.5%]	0.7156	0	23	[20.7 - 25.5%]	0.1901	0	19.4	[16.7 - 22.4%]	0.7697	0	1.38
Bradyrhizobium_sp_BTAi1	Bradyrhizobium_japonicum_USDA_122	20.3	[17.1 - 23.9%]	0.7039	0	23.3	[21 - 25.7%]	0.188	0	19.8	[17.1 - 22.8%]	0.7596	0	0.92
Bradyrhizobium_sp_BTAi1	Bradyrhizobium_japonicum_USDA_123	19.4	[16.3 - 23%]	0.7275	0	22.9	[20.6 - 25.4%]	0.1911	0	19	[16.3 - 22.1%]	0.7796	0	1.65
Bradyrhizobium_sp_BTAi1	Bradyrhizobium_japonicum_USDA_124	20.5	[17.3 - 24.1%]	0.6981	0	23.1	[20.8 - 25.5%]	0.1898	0	19.9	[17.2 - 23%]	0.7554	0	0.87
Bradyrhizobium_sp_BTAi1	Bradyrhizobium_japonicum_USDA_135	20.5	[17.3 - 24.1%]	0.6996	0	23.1	[20.8 - 25.6%]	0.1894	0	19.9	[17.2 - 22.9%]	0.7565	0	0.96
Bradyrhizobium_sp_BTAi1	Bradyrhizobium_jicamae_PAC68	18.5	[15.4 - 22.1%]	0.7542	0	22.3	[20.1 - 24.8%]	0.1964	0	18.2	[15.6 - 21.2%]	0.8025	0	2.52
Bradyrhizobium_sp_BTAi1	Bradyrhizobium_liaoningense_CCBAU_05525	19.7	[16.5 - 23.3%]	0.7209	0	23.3	[21 - 25.8%]	0.1874	0	19.3	[16.6 - 22.3%]	0.7732	0	1.12
Bradyrhizobium_sp_BTAi1	Bradyrhizobium_liaoningense_CCBAU_83689	19.7	[16.5 - 23.3%]	0.7197	0	23.3	[21 - 25.7%]	0.1878	0	19.3	[16.6 - 22.3%]	0.7723	0	1.09
Bradyrhizobium_sp_BTAi1	Bradyrhizobium_liaoningense_CCNWSX0360	20.4	[17.2 - 24%]	0.7013	0	22.9	[20.7 - 25.4%]	0.1908	0	19.8	[17.1 - 22.9%]	0.7583	0	1.21
Bradyrhizobium_sp_BTAi1	Rhizobium_lupini_HPC_L_OUTGROUP	12.7	[10.1 - 16%]	0.9862	0	18.3	[16.2 - 20.7%]	0.2399	0	13.1	[10.8 - 15.9%]	0.9895	0	5.7
Bradyrhizobium_sp_BTAi1	Bradyrhizobium_manausense_BR3351	19.4	[16.2 - 22.9%]	0.7295	0	23	[20.7 - 25.5%]	0.1902	0	19	[16.3 - 22%]	0.7809	0	2.05
Bradyrhizobium_sp_BTAi1	Bradyrhizobium_neotropicale_BR_10247	20.2	[17 - 23.8%]	0.7066	0	23	[20.7 - 25.4%]	0.1905	0	19.7	[17 - 22.7%]	0.7625	0	1.32
Bradyrhizobium_sp_BTAi1	Bradyrhizobium_oligotrophicum_S58	50.2	[46.8 - 53.7%]	0.3051	12.78	30.9	[28.5 - 33.4%]	0.1374	0.15	44.7	[41.7 - 47.8%]	0.4005	0.64	0.21
Bradyrhizobium_sp_BTAi1	Bradyrhizobium_pachyrhizi_BR3262	19.3	[16.2 - 22.9%]	0.7298	0	23.4	[21.2 - 25.9%]	0.1865	0	19	[16.3 - 22%]	0.7802	0	1.16
Bradyrhizobium_sp_BTAi1	Bradyrhizobium_pachyrhizi_PAC_48	19.4	[16.3 - 23%]	0.7277	0	23.3	[21 - 25.8%]	0.1875	0	19.1	[16.4 - 22.1%]	0.7787	0	1.16
Bradyrhizobium_sp_BTAi1	Bradyrhizobium_paxllaeri_LMTR_21	18.7	[15.6 - 22.3%]	0.7474	0	22.2	[20 - 24.7%]	0.1972	0	18.4	[15.7 - 21.4%]	0.7972	0	2.43
Bradyrhizobium_sp_BTAi1	Bradyrhizobium_retamae_Ro19	17.8	[14.7 - 21.3%]	0.7765	0	22	[19.8 - 24.5%]	0.1992	0	17.6	[15 - 20.6%]	0.8211	0	3.05
Bradyrhizobium_sp_BTAi1	Bradyrhizobium_sp_17-4	18	[14.9 - 21.5%]	0.7711	0	24.6	[22.3 - 27.1%]	0.1772	0.01	17.9	[15.3 - 20.9%]	0.8116	0	1.04
Bradyrhizobium_sp_BTAi1	Bradyrhizobium_sp_Ai1a-2	18.5	[15.4 - 22.1%]	0.7547	0	22.8	[20.6 - 25.3%]	0.1918	0	18.2	[15.6 - 21.2%]	0.8017	0	2.34
Bradyrhizobium_sp_BTAi1	Bradyrhizobium_sp_ARR65	17.6	[14.5 - 21.1%]	0.7829	0	22.2	[19.9 - 24.6%]	0.1975	0	17.4	[14.8 - 20.4%]	0.8258	0	2.91
Bradyrhizobium_sp_BTAi1	Bradyrhizobium_sp_AT1	21.2	[18 - 24.8%]	0.6809	0	23.1	[20.8 - 25.6%]	0.1893	0	20.5	[17.8 - 23.6%]	0.7413	0	0.36
Bradyrhizobium_sp_BTAi1	Bradyrhizobium_sp_BF49	20.2	[17 - 23.8%]	0.7071	0	22.7	[20.5 - 25.2%]	0.1925	0	19.6	[16.9 - 22.7%]	0.7635	0	1.15
Bradyrhizobium_sp_BTAi1	Bradyrhizobium_sp_BR_10245	19.1	[15.9 - 22.7%]	0.7374	0	23.1	[20.9 - 25.6%]	0.189	0	18.8	[16.1 - 21.8%]	0.7871	0	1.7
Bradyrhizobium_sp_BTAi1	Bradyrhizobium_sp_BR_10303	19	[15.8 - 22.6%]	0.7404	0	22.9	[20.6 - 25.3%]	0.1915	0	18.7	[16 - 21.7%]	0.7901	0	1.68
Bradyrhizobium_sp_BTAi1	Bradyrhizobium_sp_CCBAU_15544	20	[16.8 - 23.6%]	0.7115	0	23.2	[20.9 - 25.7%]	0.1886	0	19.5	[16.8 - 22.6%]	0.7659	0	1.19
Bradyrhizobium_sp_BTAi1	Bradyrhizobium_sp_CCBAU_15615	20.1	[16.9 - 23.7%]	0.7097	0	23.1	[20.8 - 25.5%]	0.1897	0	19.6	[16.9 - 22.6%]	0.7648	0	1.25
Bradyrhizobium_sp_BTAi1	Bradyrhizobium_sp_CCBAU_15635	20.4	[17.2 - 24.1%]	0.7	0	23	[20.7 - 25.5%]	0.1902	0	19.9	[17.2 - 22.9%]	0.757	0	1.11
Bradyrhizobium_sp_BTAi1	Bradyrhizobium_sp_CCBAU_41267	19.9	[16.7 - 23.5%]	0.7137	0	23.3	[21 - 25.8%]	0.1874	0	19.5	[16.8 - 22.5%]	0.7673	0	0.92
Bradyrhizobium_sp_BTAi1	Bradyrhizobium_sp_CCBAU_43298	19.7	[16.5 - 23.3%]	0.7197	0	23.2	[21 - 25.7%]	0.1882	0	19.3	[16.6 - 22.3%]	0.7725	0	1.04
Bradyrhizobium_sp_BTAi1	Bradyrhizobium_sp_CCGE-LA001	20.4	[17.2 - 24%]	0.7013	0	22.9	[20.7 - 25.4%]	0.1909	0	19.8	[17.1 - 22.9%]	0.7583	0	1.35
Bradyrhizobium_sp_BTAi1	Bradyrhizobium_sp_CCH4-A6	15.1	[12.2 - 18.5%]	0.8763	0	21.3	[19 - 23.7%]	0.2065	0	15.2	[12.7 - 18.1%]	0.9019	0	4.02
Bradyrhizobium_sp_BTAi1	Bradyrhizobium_sp_CCH5-F6	20.6	[17.4 - 24.2%]	0.6964	0	23	[20.7 - 25.4%]	0.1905	0	20	[17.3 - 23%]	0.7542	0	0.8
Bradyrhizobium_sp_BTAi1	Bradyrhizobium_sp_CCH10-C7	14.9	[12 - 18.3%]	0.8823	0	21.3	[19.1 - 23.7%]	0.206	0	15.1	[12.6 - 18%]	0.9065	0	4.2
Bradyrhizobium_sp_BTAi1	Bradyrhizobium_sp_Cp5_3	19.9	[16.8 - 23.6%]	0.7131	0	22.9	[20.6 - 25.3%]	0.1914	0	19.5	[16.8 - 22.5%]	0.768	0	1.51
Bradyrhizobium_sp_BTAi1	Bradyrhizobium_sp_DFCI-1	20.4	[17.2 - 24%]	0.7015	0	23.2	[20.9 - 25.6%]	0.1888	0	19.9	[17.1 - 22.9%]	0.7579	0	0.48
Bradyrhizobium_sp_BTAi1	Bradyrhizobium_sp_DOA1	20.4	[17.2 - 24%]	0.7014	0	22.9	[20.6 - 25.4%]	0.1909	0	19.8	[17.1 - 22.9%]	0.7584	0	1.11
Bradyrhizobium_sp_BTAi1	Bradyrhizobium_sp_DOA9	21.4	[18.2 - 25.1%]	0.6748	0	23.1	[20.9 - 25.6%]	0.1891	0	20.7	[18 - 23.8%]	0.7363	0	0.43
Bradyrhizobium_sp_BTAi1	Bradyrhizobium_sp_Ec3_3	18.8	[15.6 - 22.3%]	0.7467	0	22.8	[20.5 - 25.3%]	0.1918	0	18.5	[15.8 - 21.5%]	0.7953	0	2.28
Bradyrhizobium_sp_BTAi1	Bradyrhizobium_sp_G22	20.1	[16.9 - 23.7%]	0.7082	0	23	[20.7 - 25.5%]	0.1901	0	19.6	[16.9 - 22.7%]	0.7637	0	1.19
Bradyrhizobium_sp_BTAi1	Bradyrhizobium_sp_Leaf396	19.6	[16.4 - 23.2%]	0.7238	0	22.9	[20.6 - 25.4%]	0.1909	0	19.1	[16.4 - 22.2%]	0.7765	0	1.14
Bradyrhizobium_sp_BTAi1	Bradyrhizobium_sp_LMTR_3	18.3	[15.2 - 21.9%]	0.7599	0	22.3	[20 - 24.7%]	0.1966	0	18.1	[15.4 - 21.1%]	0.8071	0	2.65
Bradyrhizobium_sp_BTAi1	Bradyrhizobium_sp_LTSP849	20	[16.8 - 23.6%]	0.7119	0	22.6	[20.3 - 25%]	0.1941	0	19.5	[16.8 - 22.5%]	0.7678	0	1.68
Bradyrhizobium_sp_BTAi1	Bradyrhizobium_sp_LTSP857	19.8	[16.6 - 23.4%]	0.7179	0	22.6	[20.3 - 25.1%]	0.1938	0	19.3	[16.6 - 22.3%]	0.7726	0	1.63
Bradyrhizobium_sp_BTAi1	Bradyrhizobium_sp_LTSP885	19.9	[16.8 - 23.6%]	0.7131	0	22.6	[20.3 - 25%]	0.1941	0	19.4	[16.7 - 22.5%]	0.7688	0	1.53
Bradyrhizobium_sp_BTAi1	Bradyrhizobium_sp_LTSPM299	19.1	[16 - 22.7%]	0.7359	0	22.6	[20.3 - 25%]	0.1939	0	18.8	[16.1 - 21.8%]	0.7871	0	2.1
Bradyrhizobium_sp_BTAi1	Bradyrhizobium_sp_OHSU_III	20.4	[17.2 - 24.1%]	0.7	0	22.9	[20.6 - 25.4%]	0.1909	0	19.9	[17.1 - 22.9%]	0.7573	0	0.21
Bradyrhizobium_sp_BTAi1	Bradyrhizobium_sp_ORS_278	50.6	[47.1 - 54%]	0.3026	13.47	30.6	[28.2 - 33.1%]	0.1388	0.14	44.9	[41.9 - 47.9%]	0.3994	0.66	0.59
Bradyrhizobium_sp_BTAi1	Bradyrhizobium_sp_ORS_285	52.4	[48.9 - 55.8%]	0.2895	17.68	30.7	[28.3 - 33.2%]	0.1382	0.14	46.2	[43.2 - 49.3%]	0.3877	1	0.31
Bradyrhizobium_sp_BTAi1	Bradyrhizobium_sp_ORS_375	48.5	[45.1 - 51.9%]	0.3182	9.59	31.1	[28.7 - 33.6%]	0.1361	0.17	43.6	[40.6 - 46.6%]	0.411	0.44	0.57
Bradyrhizobium_sp_BTAi1	Bradyrhizobium_sp_S23321	21.2	[17.9 - 24.8%]	0.6813	0	22.8	[20.5 - 25.3%]	0.1918	0	20.5	[17.7 - 23.5%]	0.7425	0	0.62
Bradyrhizobium_sp_BTAi1	Bradyrhizobium_sp_STM_3809	50.9	[47.5 - 54.4%]	0.2999	14.27	31.4	[29 - 33.9%]	0.1349	0.18	45.5	[42.5 - 48.5%]	0.3944	0.79	1.26
Bradyrhizobium_sp_BTAi1	Bradyrhizobium_sp_STM_3843	27.6	[24.2 - 31.2%]	0.5509	0.04	24.7	[22.4 - 27.2%]	0.1762	0.01	25.9	[23 - 29%]	0.63	0	1.32
Bradyrhizobium_sp_BTAi1	Bradyrhizobium_sp_th_b2	19.1	[16 - 22.7%]	0.736	0	23	[20.7 - 25.5%]	0.19	0	18.8	[16.1 - 21.8%]	0.7861	0	1.65
Bradyrhizobium_sp_BTAi1	Bradyrhizobium_sp_Tv2a-2	18.6	[15.5 - 22.2%]	0.7519	0	22.5	[20.2 - 24.9%]	0.1948	0	18.3	[15.6 - 21.3%]	0.8003	0	2.72
Bradyrhizobium_sp_BTAi1	Bradyrhizobium_sp_URHA0002	18.5	[15.4 - 22%]	0.7558	0	22.3	[20 - 24.7%]	0.1969	0	18.2	[15.5 - 21.2%]	0.8039	0	2.72
Bradyrhizobium_sp_BTAi1	Bradyrhizobium_sp_URHA0013	20.5	[17.3 - 24.1%]	0.6984	0	22.5	[20.2 - 24.9%]	0.1951	0	19.9	[17.1 - 22.9%]	0.7572	0	1.16
Bradyrhizobium_sp_BTAi1	Bradyrhizobium_sp_URHD0069	16.3	[13.3 - 19.8%]	0.8294	0	22	[19.8 - 24.5%]	0.1991	0	16.3	[13.7 - 19.2%]	0.8633	0	4.24
Bradyrhizobium_sp_BTAi1	Bradyrhizobium_sp_USDA_3384	19.9	[16.7 - 23.5%]	0.7152	0	23.2	[20.9 - 25.6%]	0.1889	0	19.4	[16.7 - 22.5%]	0.769	0	1.36
Bradyrhizobium_sp_BTAi1	Bradyrhizobium_sp_WSM471	20.1	[16.9 - 23.7%]	0.709	0	22.8	[20.5 - 25.2%]	0.1924	0	19.6	[16.9 - 22.6%]	0.765	0	1.51
Bradyrhizobium_sp_BTAi1	Bradyrhizobium_sp_WSM1253	19.6	[16.5 - 23.2%]	0.7219	0	22.6	[20.3 - 25.1%]	0.1938	0	19.2	[16.5 - 22.2%]	0.7758	0	1.78
Bradyrhizobium_sp_BTAi1	Bradyrhizobium_sp_WSM1417	20	[16.9 - 23.6%]	0.7108	0	22.7	[20.5 - 25.2%]	0.1925	0	19.5	[16.8 - 22.6%]	0.7665	0	1.75
Bradyrhizobium_sp_BTAi1	Bradyrhizobium_sp_WSM1743	19.9	[16.7 - 23.5%]	0.7138	0	22.9	[20.6 - 25.3%]	0.1915	0	19.4	[16.7 - 22.5%]	0.7686	0	1.54
Bradyrhizobium_sp_BTAi1	Bradyrhizobium_sp_WSM2254	20.2	[17 - 23.8%]	0.7056	0	23.3	[21 - 25.7%]	0.1879	0	19.7	[17 - 22.8%]	0.7609	0	1.04
Bradyrhizobium_sp_BTAi1	Bradyrhizobium_sp_WSM2793	20.3	[17.1 - 23.9%]	0.7049	0	22.9	[20.6 - 25.4%]	0.191	0	19.7	[17 - 22.8%]	0.7612	0	1.39
Bradyrhizobium_sp_BTAi1	Bradyrhizobium_sp_WSM3983	19.5	[16.4 - 23.1%]	0.7249	0	22.7	[20.5 - 25.2%]	0.1926	0	19.1	[16.4 - 22.1%]	0.7779	0	1.95
Bradyrhizobium_sp_BTAi1	Bradyrhizobium_sp_WSM4349	19.6	[16.4 - 23.2%]	0.7225	0	22.5	[20.3 - 25%]	0.1944	0	19.1	[16.4 - 22.2%]	0.7764	0	1.78
Bradyrhizobium_sp_BTAi1	Bradyrhizobium_sp_YR681	20.5	[17.3 - 24.1%]	0.698	0	23.1	[20.8 - 25.6%]	0.1892	0	20	[17.2 - 23%]	0.7552	0	0.2
Bradyrhizobium_sp_BTAi1	Bradyrhizobium_stylosanthis_BR_446	20.4	[17.2 - 24%]	0.7001	0	23.2	[20.9 - 25.6%]	0.1887	0	19.9	[17.2 - 22.9%]	0.7567	0	0.36
Bradyrhizobium_sp_BTAi1	Bradyrhizobium_tropiciagri_SEMIA_6148	19.1	[16 - 22.7%]	0.7358	0	23.2	[20.9 - 25.7%]	0.1884	0	18.8	[16.1 - 21.8%]	0.7856	0	1.43
Bradyrhizobium_sp_BTAi1	Bradyrhizobium_valentinum_LmjM3	17.9	[14.8 - 21.4%]	0.7746	0	22.2	[20 - 24.7%]	0.1973	0	17.7	[15 - 20.6%]	0.8191	0	3
Bradyrhizobium_sp_BTAi1	Bradyrhizobium_valentinum_LmjM6	18	[15 - 21.6%]	0.7686	0	22	[19.8 - 24.5%]	0.199	0	17.8	[15.2 - 20.8%]	0.8147	0	3.04
Bradyrhizobium_sp_BTAi1	Bradyrhizobium_viridifuturi_SEMIA_690	20.2	[17 - 23.8%]	0.7062	0	22.9	[20.6 - 25.4%]	0.1912	0	19.7	[17 - 22.7%]	0.7624	0	0.89
Bradyrhizobium_sp_BTAi1	Bradyrhizobium_yuanmingense_BR3267	20.5	[17.3 - 24.1%]	0.6993	0	23	[20.7 - 25.5%]	0.19	0	19.9	[17.2 - 23%]	0.7565	0	1.05
Bradyrhizobium_sp_BTAi1	Bradyrhizobium_yuanmingense_CCBAU_05623	20.1	[17 - 23.8%]	0.7078	0	22.9	[20.6 - 25.4%]	0.191	0	19.6	[16.9 - 22.7%]	0.7636	0	1.13
Bradyrhizobium_sp_BTAi1	Bradyrhizobium_yuanmingense_CCBAU_25021	20.2	[17 - 23.8%]	0.7057	0	23.1	[20.8 - 25.5%]	0.1895	0	19.7	[17 - 22.8%]	0.7615	0	1.11
Bradyrhizobium_sp_BTAi1	Bradyrhizobium_yuanmingense_CCBAU_35157	20.1	[16.9 - 23.7%]	0.7093	0	23.1	[20.8 - 25.5%]	0.1896	0	19.6	[16.9 - 22.6%]	0.7644	0	0.98
Bradyrhizobium_diazoefficiens_NK6	Bradyrhizobium arachidis LMG 26795	40.2	[36.8 - 43.7%]	0.3905	1.77	35.9	[33.5 - 38.5%]	0.1143	0.88	38.5	[35.5 - 41.5%]	0.4602	0.08	0.07
Bradyrhizobium_diazoefficiens_NK6	Bradyrhizobium canariense GAS369	18.2	[15.1 - 21.7%]	0.7642	0	22.2	[20 - 24.7%]	0.1972	0	17.9	[15.3 - 20.9%]	0.8107	0	2.8
Bradyrhizobium_diazoefficiens_NK6	Bradyrhizobium daqingense CGMCC 1.10947	45.3	[41.9 - 48.7%]	0.3439	5.35	36.9	[34.4 - 39.4%]	0.1105	1.18	43	[40 - 46%]	0.4164	0.37	0.03
Bradyrhizobium_diazoefficiens_NK6	Bradyrhizobium erythrophlei GAS138	18.2	[15.1 - 21.8%]	0.763	0	22.5	[20.2 - 25%]	0.1947	0	18	[15.3 - 21%]	0.8092	0	2.29
Bradyrhizobium_diazoefficiens_NK6	Bradyrhizobium erythrophlei GAS242	19.6	[16.4 - 23.2%]	0.7223	0	23.1	[20.8 - 25.5%]	0.1897	0	19.2	[16.5 - 22.2%]	0.775	0	1.77
Bradyrhizobium_diazoefficiens_NK6	Bradyrhizobium erythrophlei GAS401	17.3	[14.3 - 20.9%]	0.7914	0	22.3	[20 - 24.7%]	0.1968	0	17.2	[14.6 - 20.2%]	0.8325	0	2.54
Bradyrhizobium_diazoefficiens_NK6	Bradyrhizobium erythrophlei MT12	22.6	[19.3 - 26.2%]	0.6481	0	24.3	[22 - 26.7%]	0.1798	0.01	21.8	[19 - 24.9%]	0.7114	0	0.12
Bradyrhizobium_diazoefficiens_NK6	Bradyrhizobium huanghuaihaiense CGMCC 1.10948	51.6	[48.1 - 55%]	0.2953	15.71	40.4	[37.9 - 43%]	0.098	3.01	49.1	[46.1 - 52.2%]	0.3644	2.22	0.24
Bradyrhizobium_diazoefficiens_NK6	Bradyrhizobium lablabi GAS522	21	[17.7 - 24.6%]	0.6867	0	23.3	[21 - 25.8%]	0.1876	0	20.3	[17.6 - 23.4%]	0.7455	0	1.36
Bradyrhizobium_diazoefficiens_NK6	Bradyrhizobium ottawaense GAS524	21	[17.8 - 24.6%]	0.6857	0	23.3	[21 - 25.7%]	0.1879	0	20.4	[17.6 - 23.4%]	0.7447	0	1.4
Bradyrhizobium_diazoefficiens_NK6	Bradyrhizobium sp. CF659	54.6	[51.1 - 58.1%]	0.2742	23.83	53.4	[50.7 - 56.1%]	0.0642	29.52	55	[51.9 - 58.1%]	0.3208	9.48	0.81
Bradyrhizobium_diazoefficiens_NK6	Bradyrhizobium sp. ERR11	41.1	[37.7 - 44.5%]	0.3821	2.17	35.8	[33.3 - 38.3%]	0.115	0.84	39.2	[36.2 - 42.2%]	0.4532	0.1	0.48
Bradyrhizobium_diazoefficiens_NK6	Bradyrhizobium sp. Gha	33.9	[30.5 - 37.4%]	0.4607	0.32	31.6	[29.2 - 34.2%]	0.1335	0.2	32.3	[29.3 - 35.4%]	0.5327	0.01	0.83
Bradyrhizobium_diazoefficiens_NK6	Bradyrhizobium sp. Ghvi	36.9	[33.6 - 40.4%]	0.4247	0.77	32	[29.6 - 34.5%]	0.1318	0.23	34.9	[31.9 - 37.9%]	0.5005	0.02	0.67
Bradyrhizobium_diazoefficiens_NK6	Bradyrhizobium sp. OK095	44.1	[40.7 - 47.5%]	0.3544	4.19	36.5	[34.1 - 39.1%]	0.112	1.06	41.9	[38.9 - 44.9%]	0.4267	0.26	0.18
Bradyrhizobium_diazoefficiens_NK6	Bradyrhizobium sp. R5	22.9	[19.6 - 26.5%]	0.6416	0	24.5	[22.2 - 26.9%]	0.1782	0.01	22.1	[19.3 - 25.1%]	0.7055	0	0.06
Bradyrhizobium_diazoefficiens_NK6	Bradyrhizobium sp. Rc2d	38.7	[35.3 - 42.2%]	0.4059	1.22	35.7	[33.3 - 38.2%]	0.1152	0.83	37.2	[34.2 - 40.2%]	0.4743	0.05	0.88
Bradyrhizobium_diazoefficiens_NK6	Bradyrhizobium sp. Rc3b	43.3	[40 - 46.8%]	0.3612	3.57	35.6	[33.2 - 38.1%]	0.1157	0.8	41	[38 - 44%]	0.4351	0.19	0.03
Bradyrhizobium_diazoefficiens_NK6	Bradyrhizobium yuanmingense CCBAU 10071	41.7	[38.3 - 45.1%]	0.3765	2.48	34.5	[32.1 - 37%]	0.1203	0.56	39.3	[36.4 - 42.4%]	0.4515	0.11	0.07
Bradyrhizobium_diazoefficiens_NK6	Bradyrhizobium yuanmingense CGMCC 1.3531	41.6	[38.3 - 45.1%]	0.3768	2.46	34.5	[32 - 37%]	0.1204	0.56	39.3	[36.3 - 42.3%]	0.4518	0.11	0.07
Bradyrhizobium_diazoefficiens_NK6	Mesorhizobium_ciceri_WSM1271_OUTGROUP	13.1	[10.4 - 16.4%]	0.9651	0	18.7	[16.5 - 21.1%]	0.2349	0	13.5	[11.1 - 16.2%]	0.9733	0	1.14
Bradyrhizobium_diazoefficiens_NK6	Bradyrhizobium_diazoefficiens_SEMIA_5080	81.3	[77.4 - 84.6%]	0.126	92.22	87.2	[84.6 - 89.4%]	0.0152	94.74	85.2	[82 - 87.9%]	0.1393	98.36	0.28
Bradyrhizobium_diazoefficiens_NK6	Bradyrhizobium_diazoefficiens_USDA_110	77.5	[73.5 - 81%]	0.145	88.16	86.9	[84.3 - 89.1%]	0.0155	94.61	82	[78.6 - 84.9%]	0.1582	96.87	0.36
Bradyrhizobium_diazoefficiens_NK6	Bradyrhizobium_elkanii_587	21.8	[18.5 - 25.4%]	0.6669	0	26.5	[24.2 - 29%]	0.1631	0.02	21.4	[18.6 - 24.4%]	0.7212	0	0.06
Bradyrhizobium_diazoefficiens_NK6	Bradyrhizobium_elkanii_BLY3-8	23.6	[20.3 - 27.3%]	0.6251	0.01	25.1	[22.7 - 27.5%]	0.1736	0.01	22.8	[19.9 - 25.9%]	0.6902	0	0.1
Bradyrhizobium_diazoefficiens_NK6	Bradyrhizobium_elkanii_BLY6-1	23.7	[20.4 - 27.3%]	0.6242	0.01	25.1	[22.8 - 27.6%]	0.1735	0.01	22.8	[20 - 25.9%]	0.6894	0	0.1
Bradyrhizobium_diazoefficiens_NK6	Bradyrhizobium_elkanii_CCBAU_05737	23.4	[20.1 - 27.1%]	0.6294	0.01	26.1	[23.7 - 28.6%]	0.1663	0.02	22.7	[19.9 - 25.8%]	0.691	0	0.19
Bradyrhizobium_diazoefficiens_NK6	Bradyrhizobium_elkanii_CCBAU_43297	24.3	[21 - 27.9%]	0.6117	0.01	27.1	[24.7 - 29.6%]	0.1594	0.03	23.6	[20.7 - 26.7%]	0.6736	0	0.05
Bradyrhizobium_diazoefficiens_NK6	Bradyrhizobium_elkanii_UASWS1015	22.7	[19.5 - 26.4%]	0.6445	0	24.1	[21.8 - 26.6%]	0.181	0.01	21.9	[19.1 - 25%]	0.7089	0	0.94
Bradyrhizobium_diazoefficiens_NK6	Bradyrhizobium_elkanii_USDA_76	25.3	[21.9 - 28.9%]	0.5927	0.01	27.3	[24.9 - 29.8%]	0.1582	0.03	24.4	[21.5 - 27.5%]	0.6572	0	0.01
Bradyrhizobium_diazoefficiens_NK6	Bradyrhizobium_elkanii_USDA_94	23.9	[20.6 - 27.5%]	0.6205	0.01	25.1	[22.8 - 27.6%]	0.1735	0.01	22.9	[20.1 - 26%]	0.6864	0	0.04
Bradyrhizobium_diazoefficiens_NK6	Bradyrhizobium_elkanii_USDA_3254	23.2	[19.9 - 26.8%]	0.6344	0	24.7	[22.4 - 27.2%]	0.1766	0.01	22.4	[19.5 - 25.4%]	0.699	0	0.08
Bradyrhizobium_diazoefficiens_NK6	Bradyrhizobium_elkanii_USDA_3259	23.4	[20.1 - 27%]	0.6304	0.01	24.7	[22.4 - 27.1%]	0.1767	0.01	22.5	[19.7 - 25.6%]	0.6957	0	0.21
Bradyrhizobium_diazoefficiens_NK6	Bradyrhizobium_elkanii_WSM1741	21.1	[17.9 - 24.7%]	0.683	0	23	[20.8 - 25.5%]	0.1899	0	20.4	[17.7 - 23.5%]	0.7432	0	1.61
Bradyrhizobium_diazoefficiens_NK6	Bradyrhizobium_elkanii_WSM2783	21	[17.8 - 24.6%]	0.6865	0	24.5	[22.2 - 27%]	0.1777	0.01	20.5	[17.7 - 23.5%]	0.7422	0	1.35
Bradyrhizobium_diazoefficiens_NK6	Bradyrhizobium_embrapense_SEMIA_6208	23.2	[20 - 26.9%]	0.6334	0	24.2	[21.9 - 26.7%]	0.18	0.01	22.3	[19.5 - 25.4%]	0.6994	0	0.27
Bradyrhizobium_diazoefficiens_NK6	Bradyrhizobium_icense_LMTR_13	21.2	[17.9 - 24.8%]	0.6816	0	23.4	[21.1 - 25.8%]	0.1872	0	20.5	[17.8 - 23.6%]	0.7412	0	1.68
Bradyrhizobium_diazoefficiens_NK6	Bradyrhizobium_japonicum_22	38.1	[34.7 - 41.5%]	0.4125	1.04	35	[32.5 - 37.5%]	0.1183	0.65	36.5	[33.5 - 39.5%]	0.4819	0.04	0.82
Bradyrhizobium_diazoefficiens_NK6	Bradyrhizobium_japonicum_CCBA_15517	44.7	[41.3 - 48.1%]	0.3492	4.73	39.5	[37.1 - 42.1%]	0.101	2.42	43.1	[40.1 - 46.2%]	0.4149	0.39	0.3
Bradyrhizobium_diazoefficiens_NK6	Bradyrhizobium_japonicum_CCBAU_15354	47.7	[44.3 - 51.1%]	0.3243	8.38	40.8	[38.3 - 43.3%]	0.0969	3.27	46	[43 - 49%]	0.3898	0.93	0.37
Bradyrhizobium_diazoefficiens_NK6	Bradyrhizobium_japonicum_CCBAU_15618	47.9	[44.5 - 51.3%]	0.3229	8.65	40.1	[37.6 - 42.6%]	0.0991	2.79	46	[43 - 49%]	0.39	0.92	0.28
Bradyrhizobium_diazoefficiens_NK6	Bradyrhizobium_japonicum_CCBAU_25435	46.7	[43.3 - 50.1%]	0.3325	6.96	39.8	[37.4 - 42.4%]	0.1	2.61	44.9	[41.9 - 47.9%]	0.3993	0.67	0.22
Bradyrhizobium_diazoefficiens_NK6	Bradyrhizobium_japonicum_CCBAU_83623	45.8	[42.4 - 49.2%]	0.3397	5.9	40.1	[37.6 - 42.6%]	0.0991	2.79	44.2	[41.2 - 47.2%]	0.4051	0.54	0.39
Bradyrhizobium_diazoefficiens_NK6	Bradyrhizobium_japonicum_E109	49.3	[45.9 - 52.7%]	0.3122	10.97	40.1	[37.7 - 42.7%]	0.099	2.81	47.1	[44.1 - 50.2%]	0.3802	1.29	0.04
Bradyrhizobium_diazoefficiens_NK6	Bradyrhizobium_japonicum_FN1	48.9	[45.4 - 52.3%]	0.3156	10.18	39.9	[37.5 - 42.5%]	0.0996	2.68	46.7	[43.7 - 49.7%]	0.3838	1.14	0.02
Bradyrhizobium_diazoefficiens_NK6	Bradyrhizobium_japonicum_in8p8	34.7	[31.3 - 38.2%]	0.4505	0.41	33.4	[31 - 35.9%]	0.1253	0.38	33.3	[30.4 - 36.4%]	0.5193	0.01	0.08
Bradyrhizobium_diazoefficiens_NK6	Bradyrhizobium_japonicum_Is-1	79.3	[75.3 - 82.7%]	0.1359	90.28	87.1	[84.5 - 89.3%]	0.0153	94.69	83.5	[80.2 - 86.3%]	0.1492	97.7	0.29
Bradyrhizobium_diazoefficiens_NK6	Bradyrhizobium_japonicum_is5	34.7	[31.4 - 38.3%]	0.4499	0.42	33.4	[31 - 35.9%]	0.1253	0.38	33.4	[30.4 - 36.4%]	0.5188	0.01	0.09
Bradyrhizobium_diazoefficiens_NK6	Bradyrhizobium_japonicum_Is-34	43.6	[40.3 - 47.1%]	0.3584	3.81	39.6	[37.1 - 42.1%]	0.1008	2.45	42.2	[39.3 - 45.3%]	0.4231	0.29	0.65
Bradyrhizobium_diazoefficiens_NK6	Bradyrhizobium_japonicum_SEMIA_5079	48.5	[45.1 - 51.9%]	0.3182	9.6	40.1	[37.6 - 42.7%]	0.099	2.8	46.5	[43.5 - 49.5%]	0.3857	1.07	0.16
Bradyrhizobium_diazoefficiens_NK6	Bradyrhizobium_japonicum_USDA_4	47.6	[44.2 - 51%]	0.3254	8.17	38	[35.6 - 40.6%]	0.1063	1.62	45.1	[42.1 - 48.2%]	0.3971	0.72	0.03
Bradyrhizobium_diazoefficiens_NK6	Bradyrhizobium_japonicum_USDA_6	49.2	[45.8 - 52.6%]	0.3129	10.79	40.1	[37.6 - 42.7%]	0.099	2.8	47	[44 - 50.1%]	0.3809	1.26	0.04
Bradyrhizobium_diazoefficiens_NK6	Bradyrhizobium_japonicum_USDA_38	46.2	[42.9 - 49.7%]	0.3363	6.39	39.5	[37 - 42%]	0.1012	2.39	44.4	[41.4 - 47.4%]	0.4034	0.58	0.16
Bradyrhizobium_diazoefficiens_NK6	Bradyrhizobium_japonicum_USDA_122	78.7	[74.8 - 82.2%]	0.1387	89.67	87	[84.5 - 89.2%]	0.0154	94.67	83	[79.7 - 85.9%]	0.1519	97.47	0.3
Bradyrhizobium_diazoefficiens_NK6	Bradyrhizobium_japonicum_USDA_123	45.2	[41.8 - 48.6%]	0.3451	5.21	40	[37.5 - 42.6%]	0.0993	2.74	43.7	[40.7 - 46.7%]	0.4101	0.46	0.43
Bradyrhizobium_diazoefficiens_NK6	Bradyrhizobium_japonicum_USDA_124	52.1	[48.7 - 55.6%]	0.2914	17.03	40.3	[37.8 - 42.9%]	0.0984	2.94	49.5	[46.5 - 52.6%]	0.3611	2.49	0.35
Bradyrhizobium_diazoefficiens_NK6	Bradyrhizobium_japonicum_USDA_135	45.1	[41.8 - 48.6%]	0.3455	5.16	38.1	[35.6 - 40.6%]	0.1062	1.63	43.1	[40.1 - 46.1%]	0.415	0.39	0.26
Bradyrhizobium_diazoefficiens_NK6	Bradyrhizobium_jicamae_PAC68	21.6	[18.4 - 25.2%]	0.6707	0	23.6	[21.3 - 26%]	0.1854	0	20.9	[18.1 - 24%]	0.7318	0	1.3
Bradyrhizobium_diazoefficiens_NK6	Bradyrhizobium_liaoningense_CCBAU_05525	44.1	[40.7 - 47.6%]	0.3542	4.21	38.6	[36.1 - 41.1%]	0.1044	1.88	42.4	[39.4 - 45.4%]	0.4215	0.31	0.1
Bradyrhizobium_diazoefficiens_NK6	Bradyrhizobium_liaoningense_CCBAU_83689	41.9	[38.5 - 45.3%]	0.3744	2.61	37.5	[35 - 40%]	0.1084	1.38	40.3	[37.3 - 43.3%]	0.4422	0.15	0.13
Bradyrhizobium_diazoefficiens_NK6	Bradyrhizobium_liaoningense_CCNWSX0360	41.1	[37.8 - 44.6%]	0.3815	2.2	35.3	[32.9 - 37.9%]	0.1168	0.73	39.1	[36.1 - 42.2%]	0.4537	0.1	0.01
Bradyrhizobium_diazoefficiens_NK6	Rhizobium_lupini_HPC_L_OUTGROUP	12.7	[10 - 16%]	0.9873	0	17.8	[15.6 - 20.1%]	0.2473	0	13.1	[10.8 - 15.8%]	0.9905	0	4.49
Bradyrhizobium_diazoefficiens_NK6	Bradyrhizobium_manausense_BR3351	36	[32.7 - 39.6%]	0.4346	0.61	32.5	[30.1 - 35%]	0.1292	0.28	34.3	[31.3 - 37.3%]	0.5077	0.02	0.83
Bradyrhizobium_diazoefficiens_NK6	Bradyrhizobium_neotropicale_BR_10247	37.3	[33.9 - 40.8%]	0.4208	0.85	32.7	[30.3 - 35.3%]	0.1282	0.31	35.3	[32.4 - 38.4%]	0.495	0.02	0.1
Bradyrhizobium_diazoefficiens_NK6	Bradyrhizobium_oligotrophicum_S58	20.8	[17.6 - 24.4%]	0.6911	0	23.1	[20.9 - 25.6%]	0.1891	0	20.2	[17.4 - 23.2%]	0.7495	0	1.42
Bradyrhizobium_diazoefficiens_NK6	Bradyrhizobium_pachyrhizi_BR3262	23.3	[20 - 26.9%]	0.6324	0	24.4	[22.1 - 26.9%]	0.1789	0.01	22.4	[19.6 - 25.5%]	0.6981	0	0.06
Bradyrhizobium_diazoefficiens_NK6	Bradyrhizobium_pachyrhizi_PAC_48	22.9	[19.6 - 26.5%]	0.6411	0	24.5	[22.2 - 26.9%]	0.1782	0.01	22.1	[19.3 - 25.2%]	0.705	0	0.06
Bradyrhizobium_diazoefficiens_NK6	Bradyrhizobium_paxllaeri_LMTR_21	21.7	[18.5 - 25.4%]	0.6675	0	23.5	[21.2 - 26%]	0.186	0	21	[18.2 - 24.1%]	0.7294	0	1.21
Bradyrhizobium_diazoefficiens_NK6	Bradyrhizobium_retamae_Ro19	20.8	[17.6 - 24.4%]	0.6907	0	23.2	[20.9 - 25.7%]	0.1887	0	20.2	[17.5 - 23.3%]	0.7491	0	1.84
Bradyrhizobium_diazoefficiens_NK6	Bradyrhizobium_sp_17-4	20	[16.8 - 23.6%]	0.7112	0	25.7	[23.4 - 28.2%]	0.1689	0.01	19.8	[17 - 22.8%]	0.7599	0	0.17
Bradyrhizobium_diazoefficiens_NK6	Bradyrhizobium_sp_Ai1a-2	21.7	[18.4 - 25.3%]	0.6695	0	24.2	[21.9 - 26.7%]	0.1801	0.01	21	[18.3 - 24.1%]	0.729	0	1.13
Bradyrhizobium_diazoefficiens_NK6	Bradyrhizobium_sp_ARR65	19	[15.9 - 22.6%]	0.7394	0	22.7	[20.4 - 25.1%]	0.193	0	18.7	[16 - 21.7%]	0.7897	0	1.69
Bradyrhizobium_diazoefficiens_NK6	Bradyrhizobium_sp_AT1	43.5	[40.1 - 46.9%]	0.3596	3.7	35.1	[32.7 - 37.7%]	0.1176	0.69	41	[38 - 44%]	0.4349	0.19	0.85
Bradyrhizobium_diazoefficiens_NK6	Bradyrhizobium_sp_BF49	41	[37.7 - 44.5%]	0.3823	2.16	35.4	[33 - 37.9%]	0.1164	0.75	39.1	[36.1 - 42.1%]	0.4542	0.1	0.07
Bradyrhizobium_diazoefficiens_NK6	Bradyrhizobium_sp_BR_10245	36.2	[32.8 - 39.7%]	0.4326	0.64	33	[30.6 - 35.5%]	0.1269	0.34	34.5	[31.6 - 37.6%]	0.5046	0.02	0.48
Bradyrhizobium_diazoefficiens_NK6	Bradyrhizobium_sp_BR_10303	22.8	[19.5 - 26.4%]	0.6441	0	24.6	[22.3 - 27.1%]	0.1773	0.01	22	[19.2 - 25.1%]	0.7072	0	0.46
Bradyrhizobium_diazoefficiens_NK6	Bradyrhizobium_sp_CCBAU_15544	48.8	[45.4 - 52.2%]	0.316	10.07	38.3	[35.8 - 40.8%]	0.1054	1.74	46.2	[43.2 - 49.2%]	0.3881	0.98	0.03
Bradyrhizobium_diazoefficiens_NK6	Bradyrhizobium_sp_CCBAU_15615	49.7	[46.2 - 53.1%]	0.3094	11.64	39	[36.6 - 41.6%]	0.1028	2.12	47.1	[44.1 - 50.2%]	0.3804	1.28	0.03
Bradyrhizobium_diazoefficiens_NK6	Bradyrhizobium_sp_CCBAU_15635	48.5	[45.1 - 51.9%]	0.3183	9.59	37.9	[35.4 - 40.4%]	0.1068	1.56	45.8	[42.8 - 48.9%]	0.3911	0.89	0.11
Bradyrhizobium_diazoefficiens_NK6	Bradyrhizobium_sp_CCBAU_41267	72.9	[68.9 - 76.5%]	0.1684	80.72	86.6	[83.9 - 88.8%]	0.0159	94.47	77.9	[74.4 - 81%]	0.1816	93.17	0.3
Bradyrhizobium_diazoefficiens_NK6	Bradyrhizobium_sp_CCBAU_43298	44.3	[40.9 - 47.7%]	0.3525	4.38	38.2	[35.7 - 40.7%]	0.1058	1.68	42.5	[39.5 - 45.5%]	0.421	0.31	0.18
Bradyrhizobium_diazoefficiens_NK6	Bradyrhizobium_sp_CCGE-LA001	38.3	[34.9 - 41.8%]	0.4101	1.1	34.5	[32.1 - 37%]	0.1202	0.56	36.6	[33.6 - 39.6%]	0.481	0.04	0.14
Bradyrhizobium_diazoefficiens_NK6	Bradyrhizobium_sp_CCH4-A6	15.1	[12.2 - 18.5%]	0.8759	0	22.1	[19.9 - 24.6%]	0.1982	0	15.2	[12.7 - 18.1%]	0.9005	0	2.81
Bradyrhizobium_diazoefficiens_NK6	Bradyrhizobium_sp_CCH5-F6	37	[33.7 - 40.5%]	0.4234	0.8	35.2	[32.7 - 37.7%]	0.1175	0.69	35.7	[32.7 - 38.7%]	0.4912	0.03	0.42
Bradyrhizobium_diazoefficiens_NK6	Bradyrhizobium_sp_CCH10-C7	15.4	[12.5 - 18.8%]	0.8633	0	23.4	[21.1 - 25.9%]	0.1865	0	15.6	[13 - 18.5%]	0.8888	0	2.98
Bradyrhizobium_diazoefficiens_NK6	Bradyrhizobium_sp_Cp5_3	37.6	[34.2 - 41.1%]	0.4173	0.93	32.8	[30.4 - 35.4%]	0.1277	0.32	35.6	[32.7 - 38.7%]	0.4917	0.03	0.29
Bradyrhizobium_diazoefficiens_NK6	Bradyrhizobium_sp_DFCI-1	23.2	[19.9 - 26.9%]	0.6338	0	24.3	[22 - 26.8%]	0.1792	0.01	22.3	[19.5 - 25.4%]	0.6994	0	0.74
Bradyrhizobium_diazoefficiens_NK6	Bradyrhizobium_sp_DOA1	38.4	[35 - 41.9%]	0.4088	1.14	34.6	[32.1 - 37.1%]	0.12	0.57	36.7	[33.7 - 39.7%]	0.4798	0.04	0.11
Bradyrhizobium_diazoefficiens_NK6	Bradyrhizobium_sp_DOA9	40.3	[36.9 - 43.8%]	0.3895	1.81	34.9	[32.4 - 37.4%]	0.1188	0.63	38.3	[35.3 - 41.4%]	0.462	0.07	0.79
Bradyrhizobium_diazoefficiens_NK6	Bradyrhizobium_sp_Ec3_3	31.1	[27.7 - 34.7%]	0.4971	0.13	29.1	[26.7 - 31.6%]	0.1474	0.07	29.5	[26.6 - 32.6%]	0.5713	0	1.06
Bradyrhizobium_diazoefficiens_NK6	Bradyrhizobium_sp_G22	42.6	[39.3 - 46.1%]	0.3674	3.08	37.7	[35.2 - 40.2%]	0.1075	1.48	40.9	[38 - 44%]	0.4354	0.19	0.03
Bradyrhizobium_diazoefficiens_NK6	Bradyrhizobium_sp_Leaf396	34.4	[31 - 37.9%]	0.4541	0.38	33.4	[31 - 36%]	0.125	0.39	33.1	[30.1 - 36.2%]	0.5223	0.01	0.08
Bradyrhizobium_diazoefficiens_NK6	Bradyrhizobium_sp_LMTR_3	21.3	[18.1 - 25%]	0.6772	0	23.2	[21 - 25.7%]	0.1882	0	20.7	[17.9 - 23.7%]	0.7379	0	1.43
Bradyrhizobium_diazoefficiens_NK6	Bradyrhizobium_sp_LTSP849	38.7	[35.4 - 42.2%]	0.4052	1.24	35	[32.5 - 37.5%]	0.1183	0.65	37	[34.1 - 40.1%]	0.4756	0.05	0.46
Bradyrhizobium_diazoefficiens_NK6	Bradyrhizobium_sp_LTSP857	39.2	[35.8 - 42.6%]	0.4008	1.38	35	[32.5 - 37.5%]	0.1184	0.65	37.4	[34.4 - 40.5%]	0.4717	0.05	0.41
Bradyrhizobium_diazoefficiens_NK6	Bradyrhizobium_sp_LTSP885	23.4	[20.1 - 27%]	0.6304	0.01	23.8	[21.5 - 26.2%]	0.1839	0	22.4	[19.6 - 25.5%]	0.6983	0	0.32
Bradyrhizobium_diazoefficiens_NK6	Bradyrhizobium_sp_LTSPM299	22.1	[18.9 - 25.8%]	0.6586	0	23.8	[21.5 - 26.3%]	0.1836	0	21.4	[18.6 - 24.4%]	0.7213	0	0.89
Bradyrhizobium_diazoefficiens_NK6	Bradyrhizobium_sp_OHSU_III	23.1	[19.8 - 26.7%]	0.6367	0	24.2	[21.9 - 26.7%]	0.18	0.01	22.2	[19.4 - 25.3%]	0.7021	0	1.01
Bradyrhizobium_diazoefficiens_NK6	Bradyrhizobium_sp_ORS_278	20.9	[17.7 - 24.5%]	0.6886	0	23.3	[21 - 25.8%]	0.1876	0	20.3	[17.5 - 23.3%]	0.747	0	1.81
Bradyrhizobium_diazoefficiens_NK6	Bradyrhizobium_sp_ORS_285	20.9	[17.7 - 24.6%]	0.6872	0	23.3	[21 - 25.7%]	0.188	0	20.3	[17.6 - 23.4%]	0.746	0	1.53
Bradyrhizobium_diazoefficiens_NK6	Bradyrhizobium_sp_ORS_375	20.8	[17.6 - 24.4%]	0.6904	0	23.4	[21.1 - 25.9%]	0.1866	0	20.2	[17.5 - 23.3%]	0.7482	0	1.79
Bradyrhizobium_diazoefficiens_NK6	Bradyrhizobium_sp_S23321	43.1	[39.7 - 46.5%]	0.3636	3.37	35.7	[33.2 - 38.2%]	0.1154	0.81	40.8	[37.8 - 43.8%]	0.437	0.18	0.6
Bradyrhizobium_diazoefficiens_NK6	Bradyrhizobium_sp_STM_3809	21.2	[17.9 - 24.8%]	0.6816	0	23.8	[21.5 - 26.2%]	0.1839	0	20.6	[17.8 - 23.6%]	0.7402	0	2.48
Bradyrhizobium_diazoefficiens_NK6	Bradyrhizobium_sp_STM_3843	20.4	[17.2 - 24%]	0.702	0	23.2	[20.9 - 25.6%]	0.1888	0	19.8	[17.1 - 22.9%]	0.7583	0	0.1
Bradyrhizobium_diazoefficiens_NK6	Bradyrhizobium_sp_th_b2	23.5	[20.2 - 27.1%]	0.6285	0.01	25.1	[22.8 - 27.6%]	0.1732	0.01	22.6	[19.8 - 25.7%]	0.6928	0	0.43
Bradyrhizobium_diazoefficiens_NK6	Bradyrhizobium_sp_Tv2a-2	20.6	[17.4 - 24.2%]	0.6955	0	22.9	[20.7 - 25.4%]	0.1908	0	20	[17.3 - 23.1%]	0.7536	0	1.5
Bradyrhizobium_diazoefficiens_NK6	Bradyrhizobium_sp_URHA0002	20.9	[17.6 - 24.5%]	0.6893	0	23.2	[20.9 - 25.7%]	0.1883	0	20.3	[17.5 - 23.3%]	0.7478	0	1.51
Bradyrhizobium_diazoefficiens_NK6	Bradyrhizobium_sp_URHA0013	42.6	[39.2 - 46%]	0.3681	3.03	35.4	[33 - 37.9%]	0.1165	0.75	40.3	[37.3 - 43.3%]	0.4417	0.15	0.06
Bradyrhizobium_diazoefficiens_NK6	Bradyrhizobium_sp_URHD0069	17.5	[14.4 - 21%]	0.7864	0	22.4	[20.1 - 24.8%]	0.1958	0	17.4	[14.7 - 20.3%]	0.8282	0	3.03
Bradyrhizobium_diazoefficiens_NK6	Bradyrhizobium_sp_USDA_3384	40.3	[37 - 43.8%]	0.3893	1.82	35.8	[33.3 - 38.3%]	0.115	0.84	38.5	[35.6 - 41.6%]	0.4596	0.08	0.14
Bradyrhizobium_diazoefficiens_NK6	Bradyrhizobium_sp_WSM471	41.1	[37.7 - 44.6%]	0.3816	2.19	35.8	[33.4 - 38.3%]	0.1148	0.85	39.2	[36.3 - 42.3%]	0.4526	0.1	0.3
Bradyrhizobium_diazoefficiens_NK6	Bradyrhizobium_sp_WSM1253	40.1	[36.7 - 43.5%]	0.3918	1.72	35.2	[32.8 - 37.7%]	0.1173	0.71	38.2	[35.2 - 41.3%]	0.4631	0.07	0.56
Bradyrhizobium_diazoefficiens_NK6	Bradyrhizobium_sp_WSM1417	39.5	[36.1 - 42.9%]	0.3977	1.49	35.4	[33 - 37.9%]	0.1164	0.75	37.8	[34.8 - 40.8%]	0.4678	0.06	0.54
Bradyrhizobium_diazoefficiens_NK6	Bradyrhizobium_sp_WSM1743	39.5	[36.1 - 42.9%]	0.3978	1.49	36.1	[33.7 - 38.6%]	0.1137	0.93	37.9	[35 - 41%]	0.4662	0.06	0.32
Bradyrhizobium_diazoefficiens_NK6	Bradyrhizobium_sp_WSM2254	49.8	[46.3 - 53.2%]	0.3086	11.86	53.1	[50.4 - 55.8%]	0.0648	28.54	50.5	[47.5 - 53.6%]	0.3534	3.24	0.18
Bradyrhizobium_diazoefficiens_NK6	Bradyrhizobium_sp_WSM2793	42.8	[39.4 - 46.2%]	0.366	3.18	35.5	[33.1 - 38.1%]	0.1159	0.78	40.5	[37.6 - 43.6%]	0.4395	0.16	0.17
Bradyrhizobium_diazoefficiens_NK6	Bradyrhizobium_sp_WSM3983	37.6	[34.2 - 41.1%]	0.4173	0.93	33.7	[31.2 - 36.2%]	0.124	0.42	35.8	[32.8 - 38.9%]	0.4896	0.03	0.73
Bradyrhizobium_diazoefficiens_NK6	Bradyrhizobium_sp_WSM4349	39.3	[35.9 - 42.7%]	0.3998	1.42	35.3	[32.9 - 37.8%]	0.1168	0.73	37.6	[34.6 - 40.6%]	0.4699	0.06	0.57
Bradyrhizobium_diazoefficiens_NK6	Bradyrhizobium_sp_YR681	44.3	[40.9 - 47.7%]	0.3526	4.37	38.2	[35.8 - 40.8%]	0.1056	1.71	42.5	[39.5 - 45.5%]	0.421	0.31	1.02
Bradyrhizobium_diazoefficiens_NK6	Bradyrhizobium_stylosanthis_BR_446	44.2	[40.9 - 47.7%]	0.3531	4.32	36.7	[34.3 - 39.2%]	0.1112	1.12	42	[39.1 - 45.1%]	0.4251	0.27	0.85
Bradyrhizobium_diazoefficiens_NK6	Bradyrhizobium_tropiciagri_SEMIA_6148	22.4	[19.2 - 26.1%]	0.6517	0	24.5	[22.2 - 27%]	0.1778	0.01	21.7	[18.9 - 24.8%]	0.7136	0	0.21
Bradyrhizobium_diazoefficiens_NK6	Bradyrhizobium_valentinum_LmjM3	20.5	[17.3 - 24.1%]	0.6986	0	24.2	[21.9 - 26.6%]	0.1805	0.01	20	[17.3 - 23.1%]	0.753	0	1.78
Bradyrhizobium_diazoefficiens_NK6	Bradyrhizobium_valentinum_LmjM6	20.5	[17.3 - 24.1%]	0.6988	0	23.8	[21.5 - 26.2%]	0.1837	0	20	[17.3 - 23%]	0.7541	0	1.82
Bradyrhizobium_diazoefficiens_NK6	Bradyrhizobium_viridifuturi_SEMIA_690	23.4	[20.1 - 27%]	0.6312	0	24.4	[22.1 - 26.9%]	0.1787	0.01	22.4	[19.6 - 25.5%]	0.6971	0	0.32
Bradyrhizobium_diazoefficiens_NK6	Bradyrhizobium_yuanmingense_BR3267	40.2	[36.9 - 43.7%]	0.3902	1.79	34.4	[32 - 36.9%]	0.1207	0.54	38.1	[35.2 - 41.2%]	0.4638	0.07	0.17
Bradyrhizobium_diazoefficiens_NK6	Bradyrhizobium_yuanmingense_CCBAU_05623	42.8	[39.4 - 46.2%]	0.3661	3.18	35.5	[33.1 - 38%]	0.1161	0.77	40.5	[37.5 - 43.5%]	0.4397	0.16	0.08
Bradyrhizobium_diazoefficiens_NK6	Bradyrhizobium_yuanmingense_CCBAU_25021	41.6	[38.2 - 45%]	0.3771	2.45	34.6	[32.1 - 37.1%]	0.1201	0.57	39.3	[36.3 - 42.3%]	0.4519	0.11	0.11
Bradyrhizobium_diazoefficiens_NK6	Bradyrhizobium_yuanmingense_CCBAU_35157	39.7	[36.3 - 43.1%]	0.3958	1.56	34.6	[32.1 - 37.1%]	0.1201	0.57	37.7	[34.8 - 40.8%]	0.4684	0.06	0.23
Bradyrhizobium arachidis LMG 26795	Bradyrhizobium canariense GAS369	18.3	[15.2 - 21.9%]	0.76	0	22	[19.8 - 24.5%]	0.1991	0	18	[15.4 - 21%]	0.8078	0	2.73
Bradyrhizobium arachidis LMG 26795	Bradyrhizobium daqingense CGMCC 1.10947	44.4	[41.1 - 47.9%]	0.3514	4.49	34	[31.6 - 36.5%]	0.1223	0.48	41.4	[38.5 - 44.5%]	0.4308	0.22	0.1
Bradyrhizobium arachidis LMG 26795	Bradyrhizobium erythrophlei GAS138	18.3	[15.2 - 21.8%]	0.7617	0	22.4	[20.1 - 24.9%]	0.1955	0	18	[15.4 - 21%]	0.8083	0	2.22
Bradyrhizobium arachidis LMG 26795	Bradyrhizobium erythrophlei GAS242	20.1	[16.9 - 23.7%]	0.7098	0	22.8	[20.5 - 25.2%]	0.1924	0	19.6	[16.8 - 22.6%]	0.7657	0	1.7
Bradyrhizobium arachidis LMG 26795	Bradyrhizobium erythrophlei GAS401	17.1	[14.1 - 20.6%]	0.7997	0	22.4	[20.1 - 24.8%]	0.1961	0	17	[14.4 - 20%]	0.839	0	2.47
Bradyrhizobium arachidis LMG 26795	Bradyrhizobium erythrophlei MT12	23.2	[19.9 - 26.8%]	0.6343	0	24.2	[21.9 - 26.7%]	0.1804	0.01	22.3	[19.5 - 25.4%]	0.7003	0	0.19
Bradyrhizobium arachidis LMG 26795	Bradyrhizobium huanghuaihaiense CGMCC 1.10948	49.4	[46 - 52.8%]	0.3114	11.14	37.3	[34.8 - 39.8%]	0.1091	1.31	46.4	[43.4 - 49.4%]	0.3866	1.04	0.31
Bradyrhizobium arachidis LMG 26795	Bradyrhizobium lablabi GAS522	21.4	[18.2 - 25.1%]	0.6746	0	23.2	[20.9 - 25.6%]	0.189	0	20.7	[18 - 23.8%]	0.7361	0	1.29
Bradyrhizobium arachidis LMG 26795	Bradyrhizobium ottawaense GAS524	21.4	[18.2 - 25%]	0.6756	0	23.1	[20.9 - 25.6%]	0.189	0	20.7	[17.9 - 23.8%]	0.7369	0	1.32
Bradyrhizobium arachidis LMG 26795	Bradyrhizobium sp. CF659	44.4	[41 - 47.8%]	0.3519	4.44	36.2	[33.8 - 38.7%]	0.1132	0.96	42	[39 - 45%]	0.4253	0.27	0.89
Bradyrhizobium arachidis LMG 26795	Bradyrhizobium sp. ERR11	45.5	[42.1 - 48.9%]	0.3428	5.49	35.4	[32.9 - 37.9%]	0.1167	0.74	42.6	[39.6 - 45.7%]	0.4195	0.33	0.4
Bradyrhizobium arachidis LMG 26795	Bradyrhizobium sp. Gha	37	[33.7 - 40.5%]	0.4234	0.8	32.3	[29.9 - 34.8%]	0.1304	0.26	35	[32.1 - 38.1%]	0.4986	0.02	0.76
Bradyrhizobium arachidis LMG 26795	Bradyrhizobium sp. Ghvi	39.6	[36.2 - 43%]	0.3968	1.52	32.5	[30.1 - 35%]	0.1294	0.28	37.1	[34.2 - 40.2%]	0.4749	0.05	0.6
Bradyrhizobium arachidis LMG 26795	Bradyrhizobium sp. OK095	47.1	[43.7 - 50.5%]	0.3291	7.51	34.9	[32.5 - 37.4%]	0.1186	0.64	43.8	[40.8 - 46.8%]	0.4087	0.48	0.26
Bradyrhizobium arachidis LMG 26795	Bradyrhizobium sp. R5	23.7	[20.4 - 27.3%]	0.624	0.01	24.5	[22.2 - 27%]	0.1776	0.01	22.7	[19.9 - 25.8%]	0.6908	0	0.02
Bradyrhizobium arachidis LMG 26795	Bradyrhizobium sp. Rc2d	40.7	[37.4 - 44.2%]	0.3853	2.01	35.1	[32.6 - 37.6%]	0.1178	0.68	38.7	[35.8 - 41.8%]	0.4577	0.09	0.8
Bradyrhizobium arachidis LMG 26795	Bradyrhizobium sp. Rc3b	46.7	[43.3 - 50.1%]	0.3328	6.91	35.3	[32.9 - 37.9%]	0.1168	0.73	43.6	[40.6 - 46.6%]	0.4107	0.45	0.04
Bradyrhizobium arachidis LMG 26795	Bradyrhizobium yuanmingense CCBAU 10071	41	[37.6 - 44.5%]	0.3826	2.14	33.8	[31.4 - 36.3%]	0.1233	0.44	38.6	[35.7 - 41.7%]	0.4587	0.08	0.14
Bradyrhizobium arachidis LMG 26795	Bradyrhizobium yuanmingense CGMCC 1.3531	41	[37.6 - 44.5%]	0.3826	2.14	33.8	[31.4 - 36.3%]	0.1233	0.44	38.6	[35.7 - 41.7%]	0.4588	0.08	0.14
Bradyrhizobium arachidis LMG 26795	Mesorhizobium_ciceri_WSM1271_OUTGROUP	13.1	[10.4 - 16.4%]	0.9673	0	18.6	[16.4 - 21%]	0.2363	0	13.4	[11.1 - 16.2%]	0.9751	0	1.07
Bradyrhizobium arachidis LMG 26795	Bradyrhizobium_diazoefficiens_SEMIA_5080	44.6	[41.2 - 48%]	0.3502	4.62	35.9	[33.5 - 38.4%]	0.1144	0.88	42.1	[39.1 - 45.1%]	0.4246	0.28	0.35
Bradyrhizobium arachidis LMG 26795	Bradyrhizobium_diazoefficiens_USDA_110	44.7	[41.3 - 48.1%]	0.3491	4.75	35.9	[33.5 - 38.5%]	0.1143	0.88	42.2	[39.2 - 45.2%]	0.4235	0.29	0.43
Bradyrhizobium arachidis LMG 26795	Bradyrhizobium_elkanii_587	21.8	[18.6 - 25.4%]	0.6661	0	25.5	[23.2 - 28%]	0.1705	0.01	21.3	[18.5 - 24.4%]	0.723	0	0.01
Bradyrhizobium arachidis LMG 26795	Bradyrhizobium_elkanii_BLY3-8	23.8	[20.5 - 27.4%]	0.622	0.01	24.4	[22.1 - 26.9%]	0.1785	0.01	22.8	[20 - 25.9%]	0.6895	0	0.18
Bradyrhizobium arachidis LMG 26795	Bradyrhizobium_elkanii_BLY6-1	23.8	[20.5 - 27.5%]	0.6216	0.01	24.4	[22.1 - 26.9%]	0.1785	0.01	22.8	[20 - 25.9%]	0.6892	0	0.18
Bradyrhizobium arachidis LMG 26795	Bradyrhizobium_elkanii_CCBAU_05737	23.1	[19.8 - 26.7%]	0.6366	0	24.8	[22.4 - 27.2%]	0.1759	0.01	22.3	[19.5 - 25.4%]	0.7006	0	0.12
Bradyrhizobium arachidis LMG 26795	Bradyrhizobium_elkanii_CCBAU_43297	23.5	[20.2 - 27.1%]	0.6279	0.01	25	[22.7 - 27.5%]	0.1739	0.01	22.6	[19.8 - 25.7%]	0.6926	0	0.12
Bradyrhizobium arachidis LMG 26795	Bradyrhizobium_elkanii_UASWS1015	23.4	[20.1 - 27.1%]	0.6296	0.01	24	[21.7 - 26.5%]	0.1816	0.01	22.5	[19.6 - 25.5%]	0.6968	0	1.01
Bradyrhizobium arachidis LMG 26795	Bradyrhizobium_elkanii_USDA_76	24.2	[20.9 - 27.8%]	0.6142	0.01	24.8	[22.4 - 27.2%]	0.176	0.01	23.1	[20.3 - 26.2%]	0.6821	0	0.09
Bradyrhizobium arachidis LMG 26795	Bradyrhizobium_elkanii_USDA_94	24.3	[21 - 28%]	0.6114	0.01	24.7	[22.4 - 27.2%]	0.1763	0.01	23.3	[20.4 - 26.3%]	0.6799	0	0.11
Bradyrhizobium arachidis LMG 26795	Bradyrhizobium_elkanii_USDA_3254	24.6	[21.3 - 28.2%]	0.6054	0.01	24.6	[22.2 - 27%]	0.1776	0.01	23.5	[20.6 - 26.6%]	0.6755	0	0.15
Bradyrhizobium arachidis LMG 26795	Bradyrhizobium_elkanii_USDA_3259	24.8	[21.5 - 28.4%]	0.6021	0.01	24.5	[22.2 - 27%]	0.1777	0.01	23.6	[20.8 - 26.7%]	0.6728	0	0.28
Bradyrhizobium arachidis LMG 26795	Bradyrhizobium_elkanii_WSM1741	21.3	[18.1 - 25%]	0.6771	0	22.8	[20.5 - 25.3%]	0.1919	0	20.6	[17.9 - 23.7%]	0.7391	0	1.54
Bradyrhizobium arachidis LMG 26795	Bradyrhizobium_elkanii_WSM2783	21.6	[18.4 - 25.2%]	0.671	0	23.9	[21.6 - 26.4%]	0.1824	0	20.9	[18.2 - 24%]	0.731	0	1.28
Bradyrhizobium arachidis LMG 26795	Bradyrhizobium_embrapense_SEMIA_6208	24.4	[21 - 28%]	0.6103	0.01	24.1	[21.8 - 26.6%]	0.181	0.01	23.2	[20.4 - 26.3%]	0.6809	0	0.35
Bradyrhizobium arachidis LMG 26795	Bradyrhizobium_icense_LMTR_13	20.9	[17.7 - 24.6%]	0.6872	0	22.9	[20.6 - 25.3%]	0.1914	0	20.3	[17.5 - 23.3%]	0.747	0	1.61
Bradyrhizobium arachidis LMG 26795	Bradyrhizobium_japonicum_22	37	[33.7 - 40.5%]	0.4236	0.79	34.4	[32 - 36.9%]	0.1207	0.54	35.5	[32.5 - 38.6%]	0.4931	0.03	0.9
Bradyrhizobium arachidis LMG 26795	Bradyrhizobium_japonicum_CCBA_15517	43	[39.6 - 46.4%]	0.3641	3.33	36.2	[33.8 - 38.7%]	0.1132	0.96	40.9	[37.9 - 43.9%]	0.436	0.18	0.23
Bradyrhizobium arachidis LMG 26795	Bradyrhizobium_japonicum_CCBAU_15354	42.6	[39.3 - 46.1%]	0.3673	3.09	36.2	[33.8 - 38.7%]	0.1132	0.96	40.6	[37.6 - 43.6%]	0.4389	0.17	0.3
Bradyrhizobium arachidis LMG 26795	Bradyrhizobium_japonicum_CCBAU_15618	46	[42.6 - 49.4%]	0.3384	6.08	36	[33.6 - 38.5%]	0.114	0.9	43.2	[40.3 - 46.3%]	0.4138	0.4	0.21
Bradyrhizobium arachidis LMG 26795	Bradyrhizobium_japonicum_CCBAU_25435	47.8	[44.4 - 51.2%]	0.3239	8.45	36.6	[34.1 - 39.1%]	0.1118	1.07	44.9	[41.9 - 47.9%]	0.3995	0.66	0.15
Bradyrhizobium arachidis LMG 26795	Bradyrhizobium_japonicum_CCBAU_83623	42.7	[39.3 - 46.1%]	0.367	3.11	36.2	[33.7 - 38.7%]	0.1134	0.95	40.6	[37.6 - 43.6%]	0.4387	0.17	0.32
Bradyrhizobium arachidis LMG 26795	Bradyrhizobium_japonicum_E109	48.2	[44.8 - 51.6%]	0.3205	9.13	36.4	[34 - 39%]	0.1123	1.03	45.2	[42.2 - 48.2%]	0.3968	0.73	0.03
Bradyrhizobium arachidis LMG 26795	Bradyrhizobium_japonicum_FN1	48.5	[45.1 - 52%]	0.3181	9.63	36.4	[34 - 39%]	0.1124	1.02	45.4	[42.4 - 48.4%]	0.3947	0.78	0.06
Bradyrhizobium arachidis LMG 26795	Bradyrhizobium_japonicum_in8p8	35.8	[32.4 - 39.3%]	0.4374	0.57	32.7	[30.3 - 35.2%]	0.1285	0.3	34.1	[31.1 - 37.2%]	0.5097	0.01	0.15
Bradyrhizobium arachidis LMG 26795	Bradyrhizobium_japonicum_Is-1	44.9	[41.5 - 48.3%]	0.3478	4.89	35.9	[33.5 - 38.4%]	0.1144	0.88	42.3	[39.3 - 45.3%]	0.4224	0.3	0.36
Bradyrhizobium arachidis LMG 26795	Bradyrhizobium_japonicum_is5	35.8	[32.4 - 39.3%]	0.4372	0.57	32.7	[30.3 - 35.2%]	0.1286	0.3	34.1	[31.2 - 37.2%]	0.5096	0.01	0.16
Bradyrhizobium arachidis LMG 26795	Bradyrhizobium_japonicum_Is-34	45.7	[42.3 - 49.1%]	0.3406	5.78	36.3	[33.8 - 38.8%]	0.1131	0.97	43.1	[40.1 - 46.1%]	0.4151	0.38	0.58
Bradyrhizobium arachidis LMG 26795	Bradyrhizobium_japonicum_SEMIA_5079	47	[43.6 - 50.5%]	0.3298	7.4	36	[33.6 - 38.6%]	0.1139	0.91	44.1	[41.1 - 47.1%]	0.4061	0.52	0.09
Bradyrhizobium arachidis LMG 26795	Bradyrhizobium_japonicum_USDA_4	44.3	[40.9 - 47.7%]	0.3527	4.36	35.1	[32.7 - 37.6%]	0.1177	0.68	41.6	[38.7 - 44.7%]	0.4289	0.24	0.05
Bradyrhizobium arachidis LMG 26795	Bradyrhizobium_japonicum_USDA_6	48.3	[44.9 - 51.7%]	0.3199	9.24	36.4	[34 - 39%]	0.1123	1.03	45.2	[42.2 - 48.3%]	0.3963	0.74	0.04
Bradyrhizobium arachidis LMG 26795	Bradyrhizobium_japonicum_USDA_38	46.6	[43.2 - 50%]	0.3332	6.86	35.9	[33.5 - 38.4%]	0.1145	0.87	43.7	[40.7 - 46.8%]	0.4095	0.47	0.09
Bradyrhizobium arachidis LMG 26795	Bradyrhizobium_japonicum_USDA_122	44.9	[41.5 - 48.3%]	0.3474	4.93	35.9	[33.5 - 38.4%]	0.1144	0.88	42.3	[39.4 - 45.4%]	0.4221	0.3	0.37
Bradyrhizobium arachidis LMG 26795	Bradyrhizobium_japonicum_USDA_123	43.1	[39.7 - 46.5%]	0.3635	3.38	35.9	[33.5 - 38.4%]	0.1144	0.87	40.8	[37.9 - 43.9%]	0.4363	0.18	0.36
Bradyrhizobium arachidis LMG 26795	Bradyrhizobium_japonicum_USDA_124	49.8	[46.3 - 53.2%]	0.3086	11.84	37.3	[34.9 - 39.8%]	0.1089	1.33	46.7	[43.7 - 49.7%]	0.384	1.13	0.42
Bradyrhizobium arachidis LMG 26795	Bradyrhizobium_japonicum_USDA_135	39.5	[36.2 - 43%]	0.3971	1.51	34.8	[32.3 - 37.3%]	0.1191	0.61	37.7	[34.7 - 40.7%]	0.469	0.06	0.33
Bradyrhizobium arachidis LMG 26795	Bradyrhizobium_jicamae_PAC68	21.9	[18.6 - 25.5%]	0.6639	0	23.1	[20.9 - 25.6%]	0.1891	0	21.1	[18.3 - 24.2%]	0.7274	0	1.23
Bradyrhizobium arachidis LMG 26795	Bradyrhizobium_liaoningense_CCBAU_05525	37.9	[34.5 - 41.4%]	0.4139	1.01	34.8	[32.4 - 37.3%]	0.119	0.62	36.3	[33.4 - 39.4%]	0.4836	0.03	0.17
Bradyrhizobium arachidis LMG 26795	Bradyrhizobium_liaoningense_CCBAU_83689	38.2	[34.8 - 41.7%]	0.4111	1.08	34.8	[32.4 - 37.3%]	0.1189	0.62	36.5	[33.6 - 39.6%]	0.4811	0.04	0.2
Bradyrhizobium arachidis LMG 26795	Bradyrhizobium_liaoningense_CCNWSX0360	40.3	[36.9 - 43.7%]	0.3899	1.8	34.6	[32.2 - 37.1%]	0.1199	0.58	38.2	[35.3 - 41.3%]	0.463	0.07	0.08
Bradyrhizobium arachidis LMG 26795	Rhizobium_lupini_HPC_L_OUTGROUP	12.7	[10 - 16%]	0.9887	0	17.9	[15.8 - 20.3%]	0.245	0	13.1	[10.7 - 15.8%]	0.9915	0	4.41
Bradyrhizobium arachidis LMG 26795	Bradyrhizobium_manausense_BR3351	34.3	[30.9 - 37.8%]	0.4553	0.37	32.5	[30.1 - 35%]	0.1294	0.28	32.8	[29.9 - 35.9%]	0.5257	0.01	0.76
Bradyrhizobium arachidis LMG 26795	Bradyrhizobium_neotropicale_BR_10247	41.7	[38.3 - 45.1%]	0.3762	2.5	31.6	[29.2 - 34.1%]	0.1339	0.2	38.5	[35.6 - 41.6%]	0.4597	0.08	0.03
Bradyrhizobium arachidis LMG 26795	Bradyrhizobium_oligotrophicum_S58	20.8	[17.6 - 24.5%]	0.6899	0	22.9	[20.6 - 25.3%]	0.1913	0	20.2	[17.5 - 23.2%]	0.7492	0	1.5
Bradyrhizobium arachidis LMG 26795	Bradyrhizobium_pachyrhizi_BR3262	23.8	[20.5 - 27.4%]	0.6218	0.01	24.5	[22.2 - 26.9%]	0.1782	0.01	22.8	[20 - 25.9%]	0.6892	0	0.13
Bradyrhizobium arachidis LMG 26795	Bradyrhizobium_pachyrhizi_PAC_48	24.4	[21.1 - 28.1%]	0.6086	0.01	24.5	[22.1 - 26.9%]	0.1783	0.01	23.3	[20.5 - 26.4%]	0.6784	0	0.13
Bradyrhizobium arachidis LMG 26795	Bradyrhizobium_paxllaeri_LMTR_21	22.2	[18.9 - 25.8%]	0.6572	0	23.2	[20.9 - 25.6%]	0.189	0	21.3	[18.5 - 24.4%]	0.722	0	1.14
Bradyrhizobium arachidis LMG 26795	Bradyrhizobium_retamae_Ro19	20.9	[17.7 - 24.5%]	0.6881	0	22.7	[20.4 - 25.2%]	0.1928	0	20.2	[17.5 - 23.3%]	0.7482	0	1.76
Bradyrhizobium arachidis LMG 26795	Bradyrhizobium_sp_17-4	20.4	[17.2 - 24%]	0.7015	0	25.4	[23.1 - 27.9%]	0.1709	0.01	20.1	[17.3 - 23.1%]	0.7525	0	0.25
Bradyrhizobium arachidis LMG 26795	Bradyrhizobium_sp_Ai1a-2	21.6	[18.4 - 25.3%]	0.6702	0	23.7	[21.4 - 26.1%]	0.1846	0	20.9	[18.2 - 24%]	0.7311	0	1.05
Bradyrhizobium arachidis LMG 26795	Bradyrhizobium_sp_ARR65	19.5	[16.4 - 23.1%]	0.7244	0	22.5	[20.2 - 25%]	0.1946	0	19.1	[16.4 - 22.1%]	0.778	0	1.62
Bradyrhizobium arachidis LMG 26795	Bradyrhizobium_sp_AT1	44.1	[40.7 - 47.5%]	0.3543	4.19	34.6	[32.2 - 37.2%]	0.1197	0.59	41.3	[38.4 - 44.4%]	0.4316	0.22	0.93
Bradyrhizobium arachidis LMG 26795	Bradyrhizobium_sp_BF49	40.9	[37.6 - 44.4%]	0.3833	2.11	33.5	[31.1 - 36%]	0.1246	0.4	38.5	[35.5 - 41.5%]	0.4601	0.08	0.14
Bradyrhizobium arachidis LMG 26795	Bradyrhizobium_sp_BR_10245	38.4	[35 - 41.8%]	0.4092	1.13	31.8	[29.4 - 34.3%]	0.1326	0.22	36	[33 - 39%]	0.4876	0.03	0.41
Bradyrhizobium arachidis LMG 26795	Bradyrhizobium_sp_BR_10303	22.7	[19.5 - 26.4%]	0.6445	0	24	[21.7 - 26.4%]	0.1822	0	21.9	[19.1 - 25%]	0.7093	0	0.39
Bradyrhizobium arachidis LMG 26795	Bradyrhizobium_sp_CCBAU_15544	44.3	[40.9 - 47.8%]	0.3524	4.39	35.3	[32.8 - 37.8%]	0.1171	0.71	41.7	[38.7 - 44.7%]	0.4282	0.24	0.1
Bradyrhizobium arachidis LMG 26795	Bradyrhizobium_sp_CCBAU_15615	43.6	[40.2 - 47%]	0.3592	3.74	35.2	[32.8 - 37.7%]	0.1173	0.7	41.1	[38.1 - 44.1%]	0.4343	0.2	0.04
Bradyrhizobium arachidis LMG 26795	Bradyrhizobium_sp_CCBAU_15635	45.3	[42 - 48.8%]	0.3437	5.37	35.2	[32.8 - 37.7%]	0.1173	0.7	42.5	[39.5 - 45.5%]	0.4207	0.32	0.18
Bradyrhizobium arachidis LMG 26795	Bradyrhizobium_sp_CCBAU_41267	43.9	[40.5 - 47.3%]	0.3563	4.01	36	[33.6 - 38.5%]	0.114	0.9	41.5	[38.6 - 44.6%]	0.4297	0.23	0.37
Bradyrhizobium arachidis LMG 26795	Bradyrhizobium_sp_CCBAU_43298	41.3	[37.9 - 44.7%]	0.3799	2.28	34.8	[32.3 - 37.3%]	0.1192	0.61	39.1	[36.1 - 42.1%]	0.4538	0.1	0.25
Bradyrhizobium arachidis LMG 26795	Bradyrhizobium_sp_CCGE-LA001	41.6	[38.2 - 45%]	0.3773	2.43	34	[31.6 - 36.5%]	0.1223	0.48	39.1	[36.2 - 42.2%]	0.4534	0.1	0.06
Bradyrhizobium arachidis LMG 26795	Bradyrhizobium_sp_CCH4-A6	14.9	[12 - 18.3%]	0.8837	0	21.6	[19.4 - 24%]	0.2031	0	15.1	[12.6 - 17.9%]	0.9073	0	2.74
Bradyrhizobium arachidis LMG 26795	Bradyrhizobium_sp_CCH5-F6	36.6	[33.2 - 40.1%]	0.4287	0.7	34	[31.5 - 36.5%]	0.1226	0.47	35	[32.1 - 38.1%]	0.4987	0.02	0.49
Bradyrhizobium arachidis LMG 26795	Bradyrhizobium_sp_CCH10-C7	14.9	[12 - 18.3%]	0.8842	0	21.3	[19.1 - 23.8%]	0.2057	0	15	[12.6 - 17.9%]	0.908	0	2.91
Bradyrhizobium arachidis LMG 26795	Bradyrhizobium_sp_Cp5_3	39.7	[36.3 - 43.1%]	0.3958	1.56	31.7	[29.3 - 34.2%]	0.1333	0.21	37	[34 - 40%]	0.4764	0.05	0.22
Bradyrhizobium arachidis LMG 26795	Bradyrhizobium_sp_DFCI-1	23.6	[20.3 - 27.3%]	0.6256	0.01	24.2	[21.9 - 26.6%]	0.1805	0.01	22.6	[19.8 - 25.7%]	0.6932	0	0.81
Bradyrhizobium arachidis LMG 26795	Bradyrhizobium_sp_DOA1	41.4	[38.1 - 44.9%]	0.3785	2.36	34.1	[31.7 - 36.6%]	0.1219	0.49	39.1	[36.1 - 42.1%]	0.4543	0.1	0.18
Bradyrhizobium arachidis LMG 26795	Bradyrhizobium_sp_DOA9	40.6	[37.3 - 44.1%]	0.3862	1.96	34.6	[32.2 - 37.1%]	0.1199	0.58	38.5	[35.6 - 41.6%]	0.4598	0.08	0.86
Bradyrhizobium arachidis LMG 26795	Bradyrhizobium_sp_Ec3_3	31.4	[28 - 35%]	0.4929	0.15	28.4	[26.1 - 30.9%]	0.1511	0.05	29.6	[26.7 - 32.7%]	0.5695	0	0.99
Bradyrhizobium arachidis LMG 26795	Bradyrhizobium_sp_G22	45.8	[42.4 - 49.2%]	0.3401	5.84	35.8	[33.4 - 38.4%]	0.1147	0.86	43	[40 - 46.1%]	0.4158	0.37	0.1
Bradyrhizobium arachidis LMG 26795	Bradyrhizobium_sp_Leaf396	35	[31.6 - 38.5%]	0.4472	0.45	32.6	[30.2 - 35.1%]	0.1289	0.29	33.4	[30.4 - 36.5%]	0.5185	0.01	0.15
Bradyrhizobium arachidis LMG 26795	Bradyrhizobium_sp_LMTR_3	21.6	[18.3 - 25.2%]	0.6712	0	22.9	[20.6 - 25.4%]	0.191	0	20.8	[18.1 - 23.9%]	0.734	0	1.36
Bradyrhizobium arachidis LMG 26795	Bradyrhizobium_sp_LTSP849	40.4	[37.1 - 43.9%]	0.3881	1.88	32.8	[30.4 - 35.3%]	0.128	0.31	37.9	[34.9 - 40.9%]	0.4664	0.06	0.39
Bradyrhizobium arachidis LMG 26795	Bradyrhizobium_sp_LTSP857	41.5	[38.1 - 44.9%]	0.3779	2.39	32.6	[30.2 - 35.1%]	0.1288	0.29	38.7	[35.7 - 41.7%]	0.458	0.09	0.34
Bradyrhizobium arachidis LMG 26795	Bradyrhizobium_sp_LTSP885	23.5	[20.2 - 27.1%]	0.6279	0.01	23.5	[21.2 - 26%]	0.1858	0	22.4	[19.6 - 25.5%]	0.6971	0	0.24
Bradyrhizobium arachidis LMG 26795	Bradyrhizobium_sp_LTSPM299	22.3	[19.1 - 26%]	0.6534	0	23.5	[21.2 - 26%]	0.186	0	21.5	[18.7 - 24.6%]	0.7178	0	0.81
Bradyrhizobium arachidis LMG 26795	Bradyrhizobium_sp_OHSU_III	23.6	[20.3 - 27.2%]	0.6258	0.01	24.1	[21.7 - 26.5%]	0.1815	0.01	22.6	[19.8 - 25.7%]	0.6937	0	1.08
Bradyrhizobium arachidis LMG 26795	Bradyrhizobium_sp_ORS_278	21	[17.8 - 24.6%]	0.6859	0	23	[20.7 - 25.5%]	0.1902	0	20.3	[17.6 - 23.4%]	0.7456	0	1.88
Bradyrhizobium arachidis LMG 26795	Bradyrhizobium_sp_ORS_285	21.3	[18.1 - 24.9%]	0.6787	0	23	[20.7 - 25.5%]	0.1901	0	20.6	[17.8 - 23.6%]	0.7397	0	1.6
Bradyrhizobium arachidis LMG 26795	Bradyrhizobium_sp_ORS_375	20.6	[17.4 - 24.2%]	0.6969	0	23.4	[21.1 - 25.9%]	0.1867	0	20	[17.3 - 23.1%]	0.7535	0	1.86
Bradyrhizobium arachidis LMG 26795	Bradyrhizobium_sp_S23321	44.2	[40.8 - 47.6%]	0.3533	4.29	34.4	[32 - 36.9%]	0.1206	0.55	41.4	[38.4 - 44.4%]	0.4313	0.22	0.67
Bradyrhizobium arachidis LMG 26795	Bradyrhizobium_sp_STM_3809	21.3	[18.1 - 24.9%]	0.678	0	23.6	[21.3 - 26.1%]	0.185	0	20.7	[17.9 - 23.7%]	0.7376	0	2.55
Bradyrhizobium arachidis LMG 26795	Bradyrhizobium_sp_STM_3843	20.1	[16.9 - 23.7%]	0.7088	0	23	[20.7 - 25.5%]	0.19	0	19.6	[16.9 - 22.6%]	0.7641	0	0.03
Bradyrhizobium arachidis LMG 26795	Bradyrhizobium_sp_th_b2	22.7	[19.5 - 26.4%]	0.6445	0	24.3	[22 - 26.8%]	0.1795	0.01	21.9	[19.1 - 25%]	0.7083	0	0.36
Bradyrhizobium arachidis LMG 26795	Bradyrhizobium_sp_Tv2a-2	21	[17.8 - 24.6%]	0.6853	0	22.8	[20.5 - 25.2%]	0.1921	0	20.3	[17.6 - 23.4%]	0.7458	0	1.43
Bradyrhizobium arachidis LMG 26795	Bradyrhizobium_sp_URHA0002	20.6	[17.4 - 24.2%]	0.6954	0	22.8	[20.5 - 25.2%]	0.1921	0	20	[17.3 - 23.1%]	0.7539	0	1.43
Bradyrhizobium arachidis LMG 26795	Bradyrhizobium_sp_URHA0013	43.8	[40.4 - 47.2%]	0.3573	3.91	33.6	[31.2 - 36.1%]	0.1243	0.41	40.8	[37.8 - 43.8%]	0.4372	0.18	0.13
Bradyrhizobium arachidis LMG 26795	Bradyrhizobium_sp_URHD0069	17.5	[14.5 - 21.1%]	0.7853	0	22	[19.8 - 24.5%]	0.1991	0	17.4	[14.7 - 20.3%]	0.8281	0	2.95
Bradyrhizobium arachidis LMG 26795	Bradyrhizobium_sp_USDA_3384	81.4	[77.5 - 84.8%]	0.1253	92.35	87.7	[85.2 - 89.9%]	0.0146	94.96	85.4	[82.2 - 88.1%]	0.1381	98.43	0.07
Bradyrhizobium arachidis LMG 26795	Bradyrhizobium_sp_WSM471	40.7	[37.3 - 44.1%]	0.3857	1.99	33.5	[31.1 - 36%]	0.1246	0.4	38.3	[35.3 - 41.3%]	0.4622	0.07	0.22
Bradyrhizobium arachidis LMG 26795	Bradyrhizobium_sp_WSM1253	41	[37.6 - 44.4%]	0.383	2.12	33.5	[31.1 - 36%]	0.1247	0.4	38.5	[35.6 - 41.6%]	0.4599	0.08	0.49
Bradyrhizobium arachidis LMG 26795	Bradyrhizobium_sp_WSM1417	40.1	[36.7 - 43.6%]	0.3916	1.73	33.5	[31.1 - 36%]	0.1246	0.4	37.8	[34.8 - 40.9%]	0.4674	0.06	0.46
Bradyrhizobium arachidis LMG 26795	Bradyrhizobium_sp_WSM1743	42.3	[38.9 - 45.7%]	0.3708	2.84	35.3	[32.9 - 37.8%]	0.1168	0.73	40	[37.1 - 43.1%]	0.4443	0.14	0.25
Bradyrhizobium arachidis LMG 26795	Bradyrhizobium_sp_WSM2254	41.1	[37.7 - 44.5%]	0.382	2.17	36	[33.5 - 38.5%]	0.1142	0.89	39.2	[36.3 - 42.3%]	0.4526	0.1	0.25
Bradyrhizobium arachidis LMG 26795	Bradyrhizobium_sp_WSM2793	45.2	[41.8 - 48.6%]	0.3452	5.19	35.2	[32.8 - 37.8%]	0.1172	0.71	42.4	[39.4 - 45.4%]	0.422	0.3	0.1
Bradyrhizobium arachidis LMG 26795	Bradyrhizobium_sp_WSM3983	38.9	[35.5 - 42.3%]	0.4039	1.28	33.4	[31 - 35.9%]	0.1252	0.38	36.8	[33.8 - 39.8%]	0.4786	0.04	0.66
Bradyrhizobium arachidis LMG 26795	Bradyrhizobium_sp_WSM4349	39.4	[36 - 42.9%]	0.3984	1.46	33.3	[30.8 - 35.8%]	0.1258	0.37	37.2	[34.2 - 40.2%]	0.4741	0.05	0.49
Bradyrhizobium arachidis LMG 26795	Bradyrhizobium_sp_YR681	45.7	[42.3 - 49.1%]	0.3408	5.75	36	[33.6 - 38.6%]	0.1139	0.91	43	[40 - 46%]	0.4159	0.37	1.09
Bradyrhizobium arachidis LMG 26795	Bradyrhizobium_stylosanthis_BR_446	47.6	[44.2 - 51%]	0.3255	8.16	36.5	[34.1 - 39%]	0.1121	1.04	44.7	[41.7 - 47.7%]	0.4011	0.62	0.93
Bradyrhizobium arachidis LMG 26795	Bradyrhizobium_tropiciagri_SEMIA_6148	23.3	[20 - 27%]	0.6317	0	24.3	[22 - 26.8%]	0.1792	0.01	22.4	[19.6 - 25.5%]	0.6977	0	0.14
Bradyrhizobium arachidis LMG 26795	Bradyrhizobium_valentinum_LmjM3	20.4	[17.2 - 24%]	0.7013	0	23.2	[20.9 - 25.6%]	0.1888	0	19.9	[17.1 - 22.9%]	0.7577	0	1.71
Bradyrhizobium arachidis LMG 26795	Bradyrhizobium_valentinum_LmjM6	20.4	[17.2 - 24%]	0.7007	0	23	[20.8 - 25.5%]	0.1899	0	19.9	[17.1 - 22.9%]	0.7575	0	1.75
Bradyrhizobium arachidis LMG 26795	Bradyrhizobium_viridifuturi_SEMIA_690	24.2	[20.9 - 27.9%]	0.6127	0.01	24.2	[21.9 - 26.6%]	0.1806	0.01	23.1	[20.3 - 26.2%]	0.6826	0	0.39
Bradyrhizobium arachidis LMG 26795	Bradyrhizobium_yuanmingense_BR3267	41.8	[38.5 - 45.3%]	0.3749	2.58	33.9	[31.5 - 36.4%]	0.1228	0.46	39.3	[36.3 - 42.4%]	0.4517	0.11	0.24
Bradyrhizobium arachidis LMG 26795	Bradyrhizobium_yuanmingense_CCBAU_05623	40	[36.7 - 43.5%]	0.3921	1.7	34.1	[31.7 - 36.6%]	0.1221	0.49	37.9	[34.9 - 41%]	0.4663	0.06	0.16
Bradyrhizobium arachidis LMG 26795	Bradyrhizobium_yuanmingense_CCBAU_25021	41.2	[37.9 - 44.7%]	0.3806	2.25	33.9	[31.5 - 36.4%]	0.1229	0.46	38.8	[35.9 - 41.9%]	0.4567	0.09	0.18
Bradyrhizobium arachidis LMG 26795	Bradyrhizobium_yuanmingense_CCBAU_35157	42.2	[38.8 - 45.6%]	0.3717	2.78	34	[31.6 - 36.5%]	0.1224	0.48	39.6	[36.6 - 42.6%]	0.4486	0.12	0.3
Bradyrhizobium canariense GAS369	Bradyrhizobium daqingense CGMCC 1.10947	18.3	[15.2 - 21.9%]	0.76	0	21.9	[19.6 - 24.3%]	0.2006	0	18	[15.4 - 21%]	0.8081	0	2.83
Bradyrhizobium canariense GAS369	Bradyrhizobium erythrophlei GAS138	25.5	[22.1 - 29.1%]	0.5889	0.01	26.5	[24.1 - 29%]	0.1636	0.02	24.5	[21.6 - 27.6%]	0.6562	0	0.51
Bradyrhizobium canariense GAS369	Bradyrhizobium erythrophlei GAS242	23.7	[20.4 - 27.4%]	0.6231	0.01	25.3	[23 - 27.8%]	0.1716	0.01	22.9	[20.1 - 26%]	0.6877	0	1.03
Bradyrhizobium canariense GAS369	Bradyrhizobium erythrophlei GAS401	18.6	[15.5 - 22.1%]	0.7527	0	22.9	[20.7 - 25.4%]	0.1909	0	18.3	[15.6 - 21.3%]	0.7999	0	0.25
Bradyrhizobium canariense GAS369	Bradyrhizobium erythrophlei MT12	20	[16.8 - 23.6%]	0.7121	0	23.3	[21 - 25.8%]	0.1875	0	19.5	[16.8 - 22.6%]	0.7661	0	2.92
Bradyrhizobium canariense GAS369	Bradyrhizobium huanghuaihaiense CGMCC 1.10948	18.3	[15.2 - 21.9%]	0.7596	0	22.1	[19.8 - 24.5%]	0.1984	0	18.1	[15.4 - 21%]	0.8073	0	3.04
Bradyrhizobium canariense GAS369	Bradyrhizobium lablabi GAS522	22.3	[19.1 - 26%]	0.6534	0	24.6	[22.3 - 27.1%]	0.1769	0.01	21.6	[18.9 - 24.7%]	0.7147	0	1.44
Bradyrhizobium canariense GAS369	Bradyrhizobium ottawaense GAS524	22.3	[19 - 25.9%]	0.6546	0	24.6	[22.3 - 27.1%]	0.177	0.01	21.6	[18.8 - 24.7%]	0.7158	0	1.4
Bradyrhizobium canariense GAS369	Bradyrhizobium sp. CF659	19.3	[16.2 - 22.9%]	0.7307	0	22.2	[20 - 24.7%]	0.1973	0	18.9	[16.2 - 21.9%]	0.7839	0	3.61
Bradyrhizobium canariense GAS369	Bradyrhizobium sp. ERR11	18.3	[15.2 - 21.9%]	0.7592	0	22	[19.7 - 24.4%]	0.1998	0	18.1	[15.4 - 21%]	0.8073	0	2.32
Bradyrhizobium canariense GAS369	Bradyrhizobium sp. Gha	17.7	[14.6 - 21.2%]	0.7803	0	21.7	[19.5 - 24.1%]	0.2021	0	17.5	[14.9 - 20.4%]	0.8247	0	1.97
Bradyrhizobium canariense GAS369	Bradyrhizobium sp. Ghvi	17.8	[14.8 - 21.4%]	0.7748	0	21.7	[19.4 - 24.1%]	0.2026	0	17.6	[15 - 20.6%]	0.8204	0	2.13
Bradyrhizobium canariense GAS369	Bradyrhizobium sp. OK095	18.8	[15.7 - 22.4%]	0.7447	0	21.7	[19.4 - 24.1%]	0.2023	0	18.4	[15.8 - 21.4%]	0.7963	0	2.98
Bradyrhizobium canariense GAS369	Bradyrhizobium sp. R5	19.5	[16.3 - 23.1%]	0.7264	0	23.2	[20.9 - 25.6%]	0.1887	0	19.1	[16.4 - 22.1%]	0.7781	0	2.74
Bradyrhizobium canariense GAS369	Bradyrhizobium sp. Rc2d	17.7	[14.6 - 21.2%]	0.7802	0	22.1	[19.8 - 24.5%]	0.1984	0	17.5	[14.9 - 20.5%]	0.8238	0	1.92
Bradyrhizobium canariense GAS369	Bradyrhizobium sp. Rc3b	18.6	[15.5 - 22.1%]	0.7523	0	22.1	[19.8 - 24.5%]	0.1984	0	18.3	[15.6 - 21.3%]	0.8015	0	2.77
Bradyrhizobium canariense GAS369	Bradyrhizobium yuanmingense CCBAU 10071	18.1	[15 - 21.7%]	0.7667	0	21.9	[19.7 - 24.4%]	0.2002	0	17.8	[15.2 - 20.8%]	0.8134	0	2.87
Bradyrhizobium canariense GAS369	Bradyrhizobium yuanmingense CGMCC 1.3531	18.1	[15 - 21.7%]	0.7671	0	21.9	[19.7 - 24.4%]	0.2001	0	17.8	[15.2 - 20.8%]	0.8137	0	2.87
Bradyrhizobium canariense GAS369	Mesorhizobium_ciceri_WSM1271_OUTGROUP	12.9	[10.2 - 16.2%]	0.9771	0	18.5	[16.4 - 20.9%]	0.2373	0	13.3	[10.9 - 16%]	0.9825	0	1.66
Bradyrhizobium canariense GAS369	Bradyrhizobium_diazoefficiens_SEMIA_5080	18.6	[15.5 - 22.1%]	0.7525	0	22.2	[19.9 - 24.6%]	0.1977	0	18.3	[15.6 - 21.3%]	0.8014	0	3.07
Bradyrhizobium canariense GAS369	Bradyrhizobium_diazoefficiens_USDA_110	18.6	[15.4 - 22.1%]	0.7528	0	22.2	[20 - 24.7%]	0.1973	0	18.2	[15.6 - 21.2%]	0.8016	0	3.16
Bradyrhizobium canariense GAS369	Bradyrhizobium_elkanii_587	17.8	[14.7 - 21.3%]	0.7779	0	23.7	[21.4 - 26.2%]	0.1844	0	17.7	[15 - 20.6%]	0.8189	0	2.74
Bradyrhizobium canariense GAS369	Bradyrhizobium_elkanii_BLY3-8	19.5	[16.4 - 23.1%]	0.7241	0	23.1	[20.8 - 25.6%]	0.1892	0	19.2	[16.5 - 22.2%]	0.7763	0	2.9
Bradyrhizobium canariense GAS369	Bradyrhizobium_elkanii_BLY6-1	19.6	[16.4 - 23.2%]	0.7238	0	23.1	[20.8 - 25.6%]	0.1891	0	19.2	[16.5 - 22.2%]	0.7761	0	2.9
Bradyrhizobium canariense GAS369	Bradyrhizobium_elkanii_CCBAU_05737	18.9	[15.8 - 22.5%]	0.7415	0	23.3	[21 - 25.7%]	0.1879	0	18.7	[16 - 21.7%]	0.7901	0	2.61
Bradyrhizobium canariense GAS369	Bradyrhizobium_elkanii_CCBAU_43297	19.2	[16.1 - 22.8%]	0.7338	0	23.3	[21 - 25.8%]	0.1876	0	18.9	[16.2 - 21.9%]	0.7838	0	2.85
Bradyrhizobium canariense GAS369	Bradyrhizobium_elkanii_UASWS1015	19.9	[16.7 - 23.5%]	0.714	0	22.8	[20.5 - 25.2%]	0.1922	0	19.4	[16.7 - 22.5%]	0.769	0	3.74
Bradyrhizobium canariense GAS369	Bradyrhizobium_elkanii_USDA_76	19.5	[16.4 - 23.1%]	0.7251	0	23.2	[20.9 - 25.6%]	0.1888	0	19.1	[16.4 - 22.2%]	0.777	0	2.81
Bradyrhizobium canariense GAS369	Bradyrhizobium_elkanii_USDA_94	19.6	[16.5 - 23.2%]	0.7218	0	23.1	[20.8 - 25.6%]	0.1895	0	19.2	[16.5 - 22.2%]	0.7745	0	2.84
Bradyrhizobium canariense GAS369	Bradyrhizobium_elkanii_USDA_3254	19.7	[16.5 - 23.3%]	0.7206	0	23.1	[20.8 - 25.5%]	0.1896	0	19.3	[16.6 - 22.3%]	0.7735	0	2.88
Bradyrhizobium canariense GAS369	Bradyrhizobium_elkanii_USDA_3259	19.8	[16.6 - 23.4%]	0.7177	0	23.1	[20.8 - 25.5%]	0.1898	0	19.3	[16.6 - 22.4%]	0.7713	0	3.01
Bradyrhizobium canariense GAS369	Bradyrhizobium_elkanii_WSM1741	20.1	[16.9 - 23.7%]	0.7097	0	23.3	[21 - 25.8%]	0.1877	0	19.6	[16.9 - 22.6%]	0.7642	0	1.19
Bradyrhizobium canariense GAS369	Bradyrhizobium_elkanii_WSM2783	19.1	[15.9 - 22.7%]	0.7373	0	23.2	[20.9 - 25.7%]	0.1886	0	18.8	[16.1 - 21.8%]	0.7868	0	1.45
Bradyrhizobium canariense GAS369	Bradyrhizobium_embrapense_SEMIA_6208	20	[16.8 - 23.6%]	0.7119	0	22.8	[20.5 - 25.3%]	0.1919	0	19.5	[16.8 - 22.5%]	0.7672	0	3.07
Bradyrhizobium canariense GAS369	Bradyrhizobium_icense_LMTR_13	19.7	[16.5 - 23.3%]	0.7208	0	23.6	[21.3 - 26.1%]	0.185	0	19.3	[16.6 - 22.3%]	0.7725	0	1.12
Bradyrhizobium canariense GAS369	Bradyrhizobium_japonicum_22	18.7	[15.6 - 22.3%]	0.749	0	22	[19.7 - 24.4%]	0.1993	0	18.3	[15.7 - 21.3%]	0.7991	0	3.62
Bradyrhizobium canariense GAS369	Bradyrhizobium_japonicum_CCBA_15517	17.9	[14.8 - 21.4%]	0.7743	0	22.2	[19.9 - 24.7%]	0.1974	0	17.7	[15 - 20.6%]	0.8188	0	2.5
Bradyrhizobium canariense GAS369	Bradyrhizobium_japonicum_CCBAU_15354	17.8	[14.8 - 21.4%]	0.7754	0	22.3	[20 - 24.7%]	0.197	0	17.6	[15 - 20.6%]	0.8196	0	2.43
Bradyrhizobium canariense GAS369	Bradyrhizobium_japonicum_CCBAU_15618	18	[14.9 - 21.6%]	0.7695	0	22.2	[19.9 - 24.6%]	0.1977	0	17.8	[15.2 - 20.8%]	0.8151	0	2.52
Bradyrhizobium canariense GAS369	Bradyrhizobium_japonicum_CCBAU_25435	18.2	[15.1 - 21.7%]	0.7651	0	22.1	[19.9 - 24.6%]	0.198	0	17.9	[15.3 - 20.9%]	0.8116	0	2.58
Bradyrhizobium canariense GAS369	Bradyrhizobium_japonicum_CCBAU_83623	17.8	[14.7 - 21.3%]	0.778	0	22.3	[20 - 24.7%]	0.1968	0	17.6	[14.9 - 20.5%]	0.8217	0	2.4
Bradyrhizobium canariense GAS369	Bradyrhizobium_japonicum_E109	18.7	[15.6 - 22.3%]	0.7492	0	22	[19.7 - 24.4%]	0.1995	0	18.3	[15.7 - 21.3%]	0.7993	0	2.76
Bradyrhizobium canariense GAS369	Bradyrhizobium_japonicum_FN1	18.7	[15.5 - 22.2%]	0.7498	0	22	[19.7 - 24.4%]	0.1997	0	18.3	[15.6 - 21.3%]	0.7998	0	2.78
Bradyrhizobium canariense GAS369	Bradyrhizobium_japonicum_in8p8	17.6	[14.5 - 21.1%]	0.783	0	21.7	[19.4 - 24.1%]	0.2023	0	17.4	[14.8 - 20.4%]	0.8269	0	2.88
Bradyrhizobium canariense GAS369	Bradyrhizobium_japonicum_Is-1	18.6	[15.5 - 22.2%]	0.7513	0	22.2	[19.9 - 24.6%]	0.1978	0	18.3	[15.6 - 21.3%]	0.8005	0	3.09
Bradyrhizobium canariense GAS369	Bradyrhizobium_japonicum_is5	17.6	[14.6 - 21.2%]	0.7821	0	21.7	[19.4 - 24.1%]	0.2024	0	17.4	[14.8 - 20.4%]	0.8262	0	2.89
Bradyrhizobium canariense GAS369	Bradyrhizobium_japonicum_Is-34	18.2	[15.1 - 21.8%]	0.7641	0	22	[19.7 - 24.4%]	0.1993	0	17.9	[15.3 - 20.9%]	0.8111	0	2.15
Bradyrhizobium canariense GAS369	Bradyrhizobium_japonicum_SEMIA_5079	18.6	[15.5 - 22.1%]	0.7526	0	22	[19.7 - 24.4%]	0.1996	0	18.2	[15.6 - 21.2%]	0.802	0	2.64
Bradyrhizobium canariense GAS369	Bradyrhizobium_japonicum_USDA_4	18.7	[15.6 - 22.3%]	0.7477	0	22	[19.7 - 24.4%]	0.1996	0	18.4	[15.7 - 21.4%]	0.7981	0	2.77
Bradyrhizobium canariense GAS369	Bradyrhizobium_japonicum_USDA_6	18.7	[15.6 - 22.3%]	0.749	0	22	[19.7 - 24.4%]	0.1997	0	18.3	[15.7 - 21.3%]	0.7991	0	2.76
Bradyrhizobium canariense GAS369	Bradyrhizobium_japonicum_USDA_38	18.4	[15.3 - 22%]	0.7578	0	22	[19.8 - 24.5%]	0.1992	0	18.1	[15.4 - 21.1%]	0.806	0	2.63
Bradyrhizobium canariense GAS369	Bradyrhizobium_japonicum_USDA_122	18.6	[15.5 - 22.2%]	0.752	0	22.2	[19.9 - 24.6%]	0.1979	0	18.3	[15.6 - 21.3%]	0.8011	0	3.1
Bradyrhizobium canariense GAS369	Bradyrhizobium_japonicum_USDA_123	18.1	[15 - 21.6%]	0.7681	0	22.1	[19.8 - 24.5%]	0.1986	0	17.8	[15.2 - 20.8%]	0.8142	0	2.37
Bradyrhizobium canariense GAS369	Bradyrhizobium_japonicum_USDA_124	18.4	[15.3 - 22%]	0.7571	0	22.1	[19.8 - 24.6%]	0.1983	0	18.1	[15.5 - 21.1%]	0.8053	0	3.15
Bradyrhizobium canariense GAS369	Bradyrhizobium_japonicum_USDA_135	18.4	[15.3 - 22%]	0.7573	0	22	[19.8 - 24.5%]	0.1989	0	18.1	[15.5 - 21.1%]	0.8055	0	3.06
Bradyrhizobium canariense GAS369	Bradyrhizobium_jicamae_PAC68	20.1	[17 - 23.7%]	0.7079	0	23.7	[21.4 - 26.1%]	0.1846	0	19.7	[17 - 22.7%]	0.7618	0	1.5
Bradyrhizobium canariense GAS369	Bradyrhizobium_liaoningense_CCBAU_05525	17.8	[14.8 - 21.4%]	0.775	0	22.2	[19.9 - 24.7%]	0.1973	0	17.6	[15 - 20.6%]	0.8194	0	2.9
Bradyrhizobium canariense GAS369	Bradyrhizobium_liaoningense_CCBAU_83689	17.9	[14.8 - 21.4%]	0.7745	0	22.2	[19.9 - 24.6%]	0.1978	0	17.7	[15 - 20.6%]	0.8191	0	2.93
Bradyrhizobium canariense GAS369	Bradyrhizobium_liaoningense_CCNWSX0360	18.2	[15.1 - 21.8%]	0.7628	0	22	[19.8 - 24.5%]	0.1991	0	18	[15.3 - 21%]	0.81	0	2.81
Bradyrhizobium canariense GAS369	Rhizobium_lupini_HPC_L_OUTGROUP	12.6	[9.9 - 15.9%]	0.993	0	18.5	[16.3 - 20.8%]	0.2382	0	13	[10.7 - 15.8%]	0.9947	0	1.69
Bradyrhizobium canariense GAS369	Bradyrhizobium_manausense_BR3351	17.7	[14.6 - 21.2%]	0.7812	0	22.1	[19.9 - 24.6%]	0.1982	0	17.5	[14.9 - 20.5%]	0.8246	0	1.96
Bradyrhizobium canariense GAS369	Bradyrhizobium_neotropicale_BR_10247	18.8	[15.7 - 22.4%]	0.746	0	22.2	[19.9 - 24.6%]	0.1979	0	18.4	[15.8 - 21.4%]	0.7963	0	2.7
Bradyrhizobium canariense GAS369	Bradyrhizobium_oligotrophicum_S58	17	[14 - 20.5%]	0.8034	0	22	[19.7 - 24.4%]	0.1996	0	16.9	[14.3 - 19.9%]	0.8427	0	4.22
Bradyrhizobium canariense GAS369	Bradyrhizobium_pachyrhizi_BR3262	19.7	[16.5 - 23.3%]	0.7202	0	23.1	[20.8 - 25.6%]	0.1893	0	19.3	[16.6 - 22.3%]	0.7732	0	2.86
Bradyrhizobium canariense GAS369	Bradyrhizobium_pachyrhizi_PAC_48	19.6	[16.4 - 23.2%]	0.7224	0	23	[20.8 - 25.5%]	0.1899	0	19.2	[16.5 - 22.2%]	0.7751	0	2.86
Bradyrhizobium canariense GAS369	Bradyrhizobium_paxllaeri_LMTR_21	20.2	[17 - 23.8%]	0.7058	0	23.7	[21.4 - 26.2%]	0.1843	0	19.8	[17 - 22.8%]	0.76	0	1.59
Bradyrhizobium canariense GAS369	Bradyrhizobium_retamae_Ro19	19.8	[16.7 - 23.4%]	0.7162	0	23.4	[21.1 - 25.9%]	0.1869	0	19.4	[16.7 - 22.4%]	0.7692	0	0.96
Bradyrhizobium canariense GAS369	Bradyrhizobium_sp_17-4	17.5	[14.5 - 21.1%]	0.7855	0	24.1	[21.8 - 26.5%]	0.1815	0.01	17.5	[14.9 - 20.5%]	0.8245	0	2.97
Bradyrhizobium canariense GAS369	Bradyrhizobium_sp_Ai1a-2	18.9	[15.8 - 22.5%]	0.7415	0	23.2	[20.9 - 25.7%]	0.1884	0	18.6	[16 - 21.7%]	0.7902	0	1.67
Bradyrhizobium canariense GAS369	Bradyrhizobium_sp_ARR65	17.8	[14.7 - 21.4%]	0.776	0	22.1	[19.8 - 24.5%]	0.1984	0	17.6	[15 - 20.6%]	0.8204	0	1.11
Bradyrhizobium canariense GAS369	Bradyrhizobium_sp_AT1	18.8	[15.7 - 22.4%]	0.7454	0	22.1	[19.8 - 24.5%]	0.1988	0	18.4	[15.8 - 21.4%]	0.796	0	3.65
Bradyrhizobium canariense GAS369	Bradyrhizobium_sp_BF49	18.7	[15.6 - 22.3%]	0.7479	0	21.8	[19.5 - 24.2%]	0.2013	0	18.4	[15.7 - 21.4%]	0.7986	0	2.87
Bradyrhizobium canariense GAS369	Bradyrhizobium_sp_BR_10245	18.3	[15.2 - 21.8%]	0.7612	0	22.3	[20.1 - 24.8%]	0.1963	0	18	[15.4 - 21%]	0.8081	0	2.32
Bradyrhizobium canariense GAS369	Bradyrhizobium_sp_BR_10303	19.2	[16.1 - 22.8%]	0.7326	0	23	[20.7 - 25.5%]	0.1903	0	18.9	[16.2 - 21.9%]	0.7835	0	2.34
Bradyrhizobium canariense GAS369	Bradyrhizobium_sp_CCBAU_15544	18.4	[15.3 - 22%]	0.7569	0	22.1	[19.8 - 24.5%]	0.1988	0	18.1	[15.5 - 21.1%]	0.8052	0	2.83
Bradyrhizobium canariense GAS369	Bradyrhizobium_sp_CCBAU_15615	18.5	[15.4 - 22%]	0.7555	0	22	[19.8 - 24.5%]	0.1989	0	18.2	[15.5 - 21.2%]	0.8041	0	2.77
Bradyrhizobium canariense GAS369	Bradyrhizobium_sp_CCBAU_15635	18.7	[15.6 - 22.3%]	0.7488	0	22	[19.7 - 24.4%]	0.1994	0	18.3	[15.7 - 21.3%]	0.7989	0	2.91
Bradyrhizobium canariense GAS369	Bradyrhizobium_sp_CCBAU_41267	18.2	[15.1 - 21.7%]	0.7644	0	22.3	[20.1 - 24.8%]	0.1963	0	17.9	[15.3 - 20.9%]	0.8106	0	3.1
Bradyrhizobium canariense GAS369	Bradyrhizobium_sp_CCBAU_43298	18.2	[15.1 - 21.7%]	0.7645	0	22.3	[20 - 24.7%]	0.1967	0	17.9	[15.3 - 20.9%]	0.8109	0	2.97
Bradyrhizobium canariense GAS369	Bradyrhizobium_sp_CCGE-LA001	18.3	[15.2 - 21.9%]	0.7598	0	21.9	[19.6 - 24.3%]	0.2004	0	18	[15.4 - 21%]	0.808	0	2.66
Bradyrhizobium canariense GAS369	Bradyrhizobium_sp_CCH4-A6	15.1	[12.2 - 18.5%]	0.8751	0	21.6	[19.3 - 24%]	0.2035	0	15.2	[12.7 - 18.1%]	0.9005	0	0.01
Bradyrhizobium canariense GAS369	Bradyrhizobium_sp_CCH5-F6	18.1	[15 - 21.6%]	0.7677	0	22.1	[19.8 - 24.5%]	0.1986	0	17.8	[15.2 - 20.8%]	0.8139	0	3.22
Bradyrhizobium canariense GAS369	Bradyrhizobium_sp_CCH10-C7	15	[12.2 - 18.5%]	0.8774	0	21.5	[19.3 - 24%]	0.204	0	15.2	[12.7 - 18.1%]	0.9024	0	0.18
Bradyrhizobium canariense GAS369	Bradyrhizobium_sp_Cp5_3	18.4	[15.3 - 22%]	0.757	0	22.1	[19.9 - 24.6%]	0.198	0	18.1	[15.5 - 21.1%]	0.8051	0	2.51
Bradyrhizobium canariense GAS369	Bradyrhizobium_sp_DFCI-1	19.9	[16.7 - 23.5%]	0.7137	0	22.8	[20.6 - 25.3%]	0.1918	0	19.4	[16.7 - 22.5%]	0.7686	0	3.54
Bradyrhizobium canariense GAS369	Bradyrhizobium_sp_DOA1	18.4	[15.3 - 22%]	0.7581	0	22	[19.7 - 24.4%]	0.1997	0	18.1	[15.4 - 21.1%]	0.8064	0	2.91
Bradyrhizobium canariense GAS369	Bradyrhizobium_sp_DOA9	18.7	[15.6 - 22.3%]	0.748	0	22	[19.7 - 24.4%]	0.1997	0	18.4	[15.7 - 21.4%]	0.7984	0	3.59
Bradyrhizobium canariense GAS369	Bradyrhizobium_sp_Ec3_3	18	[14.9 - 21.5%]	0.7708	0	21.9	[19.7 - 24.4%]	0.1999	0	17.7	[15.1 - 20.7%]	0.8166	0	1.74
Bradyrhizobium canariense GAS369	Bradyrhizobium_sp_G22	18.6	[15.5 - 22.2%]	0.7507	0	22	[19.7 - 24.4%]	0.1995	0	18.3	[15.6 - 21.3%]	0.8004	0	2.83
Bradyrhizobium canariense GAS369	Bradyrhizobium_sp_Leaf396	17.5	[14.5 - 21.1%]	0.7848	0	21.7	[19.5 - 24.2%]	0.2018	0	17.4	[14.7 - 20.3%]	0.8282	0	2.88
Bradyrhizobium canariense GAS369	Bradyrhizobium_sp_LMTR_3	20	[16.8 - 23.6%]	0.7112	0	23.6	[21.3 - 26.1%]	0.185	0	19.6	[16.9 - 22.6%]	0.7646	0	1.37
Bradyrhizobium canariense GAS369	Bradyrhizobium_sp_LTSP849	19	[15.9 - 22.6%]	0.7396	0	21.9	[19.6 - 24.3%]	0.2007	0	18.6	[15.9 - 21.6%]	0.7919	0	2.34
Bradyrhizobium canariense GAS369	Bradyrhizobium_sp_LTSP857	19	[15.8 - 22.5%]	0.7411	0	21.9	[19.6 - 24.3%]	0.2007	0	18.5	[15.9 - 21.6%]	0.793	0	2.38
Bradyrhizobium canariense GAS369	Bradyrhizobium_sp_LTSP885	20.5	[17.3 - 24.1%]	0.6993	0	23.3	[21.1 - 25.8%]	0.1873	0	19.9	[17.2 - 23%]	0.7557	0	2.48
Bradyrhizobium canariense GAS369	Bradyrhizobium_sp_LTSPM299	20.1	[16.9 - 23.7%]	0.7097	0	23.2	[20.9 - 25.6%]	0.1887	0	19.6	[16.9 - 22.6%]	0.7645	0	1.91
Bradyrhizobium canariense GAS369	Bradyrhizobium_sp_OHSU_III	20.1	[16.9 - 23.7%]	0.7083	0	22.9	[20.6 - 25.3%]	0.1912	0	19.6	[16.9 - 22.7%]	0.7641	0	3.81
Bradyrhizobium canariense GAS369	Bradyrhizobium_sp_ORS_278	17	[14 - 20.5%]	0.8037	0	21.9	[19.6 - 24.3%]	0.2006	0	16.9	[14.3 - 19.8%]	0.843	0	4.61
Bradyrhizobium canariense GAS369	Bradyrhizobium_sp_ORS_285	16.8	[13.7 - 20.3%]	0.8117	0	22	[19.7 - 24.4%]	0.1997	0	16.7	[14.1 - 19.6%]	0.8493	0	4.33
Bradyrhizobium canariense GAS369	Bradyrhizobium_sp_ORS_375	16.6	[13.6 - 20.1%]	0.8181	0	22.2	[19.9 - 24.6%]	0.1976	0	16.6	[14 - 19.5%]	0.854	0	4.59
Bradyrhizobium canariense GAS369	Bradyrhizobium_sp_S23321	19.3	[16.1 - 22.9%]	0.7314	0	21.8	[19.6 - 24.3%]	0.2011	0	18.8	[16.1 - 21.8%]	0.7854	0	3.4
Bradyrhizobium canariense GAS369	Bradyrhizobium_sp_STM_3809	16.9	[13.9 - 20.4%]	0.8071	0	22.4	[20.2 - 24.9%]	0.1954	0	16.8	[14.2 - 19.8%]	0.8448	0	5.28
Bradyrhizobium canariense GAS369	Bradyrhizobium_sp_STM_3843	16.9	[13.9 - 20.5%]	0.805	0	22.2	[19.9 - 24.6%]	0.1978	0	16.9	[14.3 - 19.8%]	0.8436	0	2.7
Bradyrhizobium canariense GAS369	Bradyrhizobium_sp_th_b2	19.4	[16.2 - 23%]	0.7288	0	23.1	[20.8 - 25.5%]	0.1898	0	19	[16.3 - 22%]	0.7803	0	2.37
Bradyrhizobium canariense GAS369	Bradyrhizobium_sp_Tv2a-2	18.3	[15.2 - 21.9%]	0.7595	0	22.1	[19.8 - 24.5%]	0.1988	0	18.1	[15.4 - 21%]	0.8073	0	1.3
Bradyrhizobium canariense GAS369	Bradyrhizobium_sp_URHA0002	21.6	[18.4 - 25.3%]	0.6704	0	23.5	[21.2 - 26%]	0.1859	0	20.9	[18.1 - 24%]	0.7317	0	1.29
Bradyrhizobium canariense GAS369	Bradyrhizobium_sp_URHA0013	19.1	[16 - 22.7%]	0.7369	0	21.8	[19.5 - 24.2%]	0.2014	0	18.7	[16 - 21.7%]	0.7899	0	2.86
Bradyrhizobium canariense GAS369	Bradyrhizobium_sp_URHD0069	22.4	[19.1 - 26%]	0.6526	0	25.6	[23.3 - 28.1%]	0.1697	0.01	21.8	[19 - 24.9%]	0.7115	0	0.23
Bradyrhizobium canariense GAS369	Bradyrhizobium_sp_USDA_3384	18.4	[15.3 - 21.9%]	0.7588	0	22	[19.7 - 24.4%]	0.1995	0	18.1	[15.4 - 21.1%]	0.8069	0	2.66
Bradyrhizobium canariense GAS369	Bradyrhizobium_sp_WSM471	18.6	[15.5 - 22.1%]	0.7524	0	21.9	[19.7 - 24.4%]	0.2002	0	18.2	[15.6 - 21.2%]	0.8019	0	2.5
Bradyrhizobium canariense GAS369	Bradyrhizobium_sp_WSM1253	18.4	[15.3 - 21.9%]	0.7583	0	21.9	[19.6 - 24.3%]	0.2005	0	18.1	[15.4 - 21.1%]	0.8067	0	2.24
Bradyrhizobium canariense GAS369	Bradyrhizobium_sp_WSM1417	18.8	[15.7 - 22.4%]	0.745	0	21.7	[19.4 - 24.1%]	0.2026	0	18.4	[15.8 - 21.4%]	0.7967	0	2.26
Bradyrhizobium canariense GAS369	Bradyrhizobium_sp_WSM1743	18.2	[15.1 - 21.8%]	0.7638	0	22.1	[19.8 - 24.5%]	0.1988	0	17.9	[15.3 - 20.9%]	0.8108	0	2.48
Bradyrhizobium canariense GAS369	Bradyrhizobium_sp_WSM2254	18.8	[15.7 - 22.4%]	0.7443	0	22.2	[19.9 - 24.6%]	0.1975	0	18.5	[15.8 - 21.5%]	0.7948	0	2.98
Bradyrhizobium canariense GAS369	Bradyrhizobium_sp_WSM2793	18.3	[15.2 - 21.9%]	0.76	0	22.1	[19.8 - 24.5%]	0.1986	0	18	[15.4 - 21%]	0.8077	0	2.62
Bradyrhizobium canariense GAS369	Bradyrhizobium_sp_WSM3983	18.1	[15 - 21.6%]	0.7678	0	22	[19.7 - 24.4%]	0.1996	0	17.8	[15.2 - 20.8%]	0.8142	0	2.07
Bradyrhizobium canariense GAS369	Bradyrhizobium_sp_WSM4349	18.5	[15.3 - 22%]	0.756	0	21.8	[19.5 - 24.2%]	0.2012	0	18.1	[15.5 - 21.1%]	0.8051	0	2.23
Bradyrhizobium canariense GAS369	Bradyrhizobium_sp_YR681	18.9	[15.7 - 22.4%]	0.7439	0	22	[19.8 - 24.5%]	0.1989	0	18.5	[15.8 - 21.5%]	0.7949	0	3.82
Bradyrhizobium canariense GAS369	Bradyrhizobium_stylosanthis_BR_446	18.6	[15.5 - 22.1%]	0.7524	0	22.1	[19.8 - 24.5%]	0.1988	0	18.2	[15.6 - 21.2%]	0.8016	0	3.65
Bradyrhizobium canariense GAS369	Bradyrhizobium_tropiciagri_SEMIA_6148	18.9	[15.8 - 22.5%]	0.7419	0	23.2	[20.9 - 25.7%]	0.1886	0	18.6	[16 - 21.6%]	0.7906	0	2.59
Bradyrhizobium canariense GAS369	Bradyrhizobium_valentinum_LmjM3	19.6	[16.5 - 23.3%]	0.7212	0	24	[21.7 - 26.5%]	0.182	0	19.3	[16.6 - 22.3%]	0.7719	0	1.02
Bradyrhizobium canariense GAS369	Bradyrhizobium_valentinum_LmjM6	19.7	[16.6 - 23.3%]	0.7191	0	23.9	[21.6 - 26.4%]	0.1825	0	19.4	[16.7 - 22.4%]	0.7704	0	0.98
Bradyrhizobium canariense GAS369	Bradyrhizobium_viridifuturi_SEMIA_690	19.7	[16.6 - 23.3%]	0.7192	0	22.8	[20.5 - 25.3%]	0.1918	0	19.3	[16.6 - 22.3%]	0.7731	0	3.12
Bradyrhizobium canariense GAS369	Bradyrhizobium_yuanmingense_BR3267	18.1	[15 - 21.6%]	0.7679	0	22	[19.8 - 24.5%]	0.1992	0	17.8	[15.2 - 20.8%]	0.8141	0	2.96
Bradyrhizobium canariense GAS369	Bradyrhizobium_yuanmingense_CCBAU_05623	17.7	[14.6 - 21.3%]	0.7792	0	22.2	[19.9 - 24.6%]	0.1976	0	17.5	[14.9 - 20.5%]	0.8228	0	2.88
Bradyrhizobium canariense GAS369	Bradyrhizobium_yuanmingense_CCBAU_25021	18	[14.9 - 21.5%]	0.7707	0	22.1	[19.8 - 24.5%]	0.1988	0	17.7	[15.1 - 20.7%]	0.8163	0	2.91
Bradyrhizobium canariense GAS369	Bradyrhizobium_yuanmingense_CCBAU_35157	17.8	[14.8 - 21.4%]	0.775	0	22.1	[19.9 - 24.6%]	0.1982	0	17.6	[15 - 20.6%]	0.8196	0	3.03
Bradyrhizobium daqingense CGMCC 1.10947	Bradyrhizobium erythrophlei GAS138	18.4	[15.3 - 22%]	0.7577	0	22	[19.7 - 24.4%]	0.1996	0	18.1	[15.4 - 21.1%]	0.806	0	2.32
Bradyrhizobium daqingense CGMCC 1.10947	Bradyrhizobium erythrophlei GAS242	19.6	[16.4 - 23.2%]	0.7226	0	22.6	[20.3 - 25%]	0.1942	0	19.1	[16.4 - 22.2%]	0.7764	0	1.81
Bradyrhizobium daqingense CGMCC 1.10947	Bradyrhizobium erythrophlei GAS401	17.4	[14.3 - 20.9%]	0.7902	0	22.2	[19.9 - 24.6%]	0.1977	0	17.2	[14.6 - 20.2%]	0.8317	0	2.58
Bradyrhizobium daqingense CGMCC 1.10947	Bradyrhizobium erythrophlei MT12	22.6	[19.4 - 26.3%]	0.6467	0	23.8	[21.5 - 26.3%]	0.1833	0	21.8	[19 - 24.9%]	0.7115	0	0.09
Bradyrhizobium daqingense CGMCC 1.10947	Bradyrhizobium huanghuaihaiense CGMCC 1.10948	54.7	[51.2 - 58.2%]	0.2736	24.1	37.8	[35.3 - 40.3%]	0.1072	1.52	50.8	[47.7 - 53.8%]	0.3514	3.45	0.2
Bradyrhizobium daqingense CGMCC 1.10947	Bradyrhizobium lablabi GAS522	21.4	[18.2 - 25.1%]	0.6747	0	22.9	[20.6 - 25.3%]	0.1916	0	20.7	[17.9 - 23.8%]	0.737	0	1.4
Bradyrhizobium daqingense CGMCC 1.10947	Bradyrhizobium ottawaense GAS524	21.4	[18.2 - 25%]	0.6758	0	22.8	[20.6 - 25.3%]	0.1917	0	20.7	[17.9 - 23.7%]	0.7379	0	1.43
Bradyrhizobium daqingense CGMCC 1.10947	Bradyrhizobium sp. CF659	46.4	[43 - 49.9%]	0.3346	6.63	35	[32.5 - 37.5%]	0.1183	0.65	43.3	[40.3 - 46.3%]	0.4133	0.41	0.78
Bradyrhizobium daqingense CGMCC 1.10947	Bradyrhizobium sp. ERR11	48.3	[44.9 - 51.7%]	0.32	9.23	34.9	[32.5 - 37.4%]	0.1186	0.64	44.7	[41.7 - 47.8%]	0.4006	0.64	0.51
Bradyrhizobium daqingense CGMCC 1.10947	Bradyrhizobium sp. Gha	37.1	[33.7 - 40.6%]	0.423	0.81	30.4	[28 - 32.9%]	0.1399	0.12	34.6	[31.6 - 37.7%]	0.5038	0.02	0.87
Bradyrhizobium daqingense CGMCC 1.10947	Bradyrhizobium sp. Ghvi	39.8	[36.4 - 43.2%]	0.3947	1.6	30.4	[28 - 32.9%]	0.1397	0.13	36.7	[33.8 - 39.8%]	0.4793	0.04	0.7
Bradyrhizobium daqingense CGMCC 1.10947	Bradyrhizobium sp. OK095	44.7	[41.4 - 48.2%]	0.3489	4.76	32.6	[30.2 - 35.1%]	0.1287	0.29	41.2	[38.2 - 44.3%]	0.4327	0.21	0.15
Bradyrhizobium daqingense CGMCC 1.10947	Bradyrhizobium sp. R5	23.2	[19.9 - 26.8%]	0.6352	0	24.1	[21.7 - 26.5%]	0.1815	0.01	22.2	[19.4 - 25.3%]	0.7014	0	0.09
Bradyrhizobium daqingense CGMCC 1.10947	Bradyrhizobium sp. Rc2d	44.4	[41 - 47.8%]	0.3519	4.44	37.6	[35.1 - 40.1%]	0.108	1.43	42.4	[39.4 - 45.4%]	0.4219	0.3	0.91
Bradyrhizobium daqingense CGMCC 1.10947	Bradyrhizobium sp. Rc3b	50.6	[47.1 - 54%]	0.3027	13.46	34.9	[32.5 - 37.4%]	0.1185	0.64	46.5	[43.5 - 49.6%]	0.3853	1.08	0.06
Bradyrhizobium daqingense CGMCC 1.10947	Bradyrhizobium yuanmingense CCBAU 10071	53.6	[50.1 - 57%]	0.2814	20.74	35.1	[32.6 - 37.6%]	0.1178	0.67	48.9	[45.8 - 51.9%]	0.3661	2.09	0.04
Bradyrhizobium daqingense CGMCC 1.10947	Bradyrhizobium yuanmingense CGMCC 1.3531	53.5	[50 - 57%]	0.2818	20.59	35.1	[32.6 - 37.6%]	0.1179	0.67	48.8	[45.8 - 51.9%]	0.3665	2.07	0.04
Bradyrhizobium daqingense CGMCC 1.10947	Mesorhizobium_ciceri_WSM1271_OUTGROUP	13.1	[10.4 - 16.5%]	0.9648	0	18.9	[16.8 - 21.3%]	0.2323	0	13.5	[11.1 - 16.3%]	0.973	0	1.17
Bradyrhizobium daqingense CGMCC 1.10947	Bradyrhizobium_diazoefficiens_SEMIA_5080	51.2	[47.8 - 54.7%]	0.2978	14.92	37.6	[35.1 - 40.1%]	0.1079	1.44	48	[44.9 - 51%]	0.3735	1.62	0.24
Bradyrhizobium daqingense CGMCC 1.10947	Bradyrhizobium_diazoefficiens_USDA_110	51.9	[48.4 - 55.3%]	0.2933	16.36	37.7	[35.3 - 40.2%]	0.1074	1.49	48.5	[45.5 - 51.5%]	0.3692	1.88	0.33
Bradyrhizobium daqingense CGMCC 1.10947	Bradyrhizobium_elkanii_587	21.6	[18.4 - 25.3%]	0.6698	0	26.1	[23.7 - 28.5%]	0.1665	0.02	21.2	[18.4 - 24.3%]	0.7248	0	0.09
Bradyrhizobium daqingense CGMCC 1.10947	Bradyrhizobium_elkanii_BLY3-8	23.4	[20.1 - 27%]	0.6302	0.01	24.1	[21.8 - 26.5%]	0.1814	0.01	22.4	[19.6 - 25.5%]	0.6973	0	0.07
Bradyrhizobium daqingense CGMCC 1.10947	Bradyrhizobium_elkanii_BLY6-1	23.4	[20.1 - 27.1%]	0.6299	0.01	24.1	[21.8 - 26.5%]	0.1814	0.01	22.4	[19.6 - 25.5%]	0.697	0	0.07
Bradyrhizobium daqingense CGMCC 1.10947	Bradyrhizobium_elkanii_CCBAU_05737	23.1	[19.8 - 26.8%]	0.6362	0	25.7	[23.3 - 28.1%]	0.1693	0.01	22.4	[19.6 - 25.5%]	0.6978	0	0.22
Bradyrhizobium daqingense CGMCC 1.10947	Bradyrhizobium_elkanii_CCBAU_43297	23.2	[19.9 - 26.9%]	0.6343	0	24.7	[22.4 - 27.2%]	0.1761	0.01	22.4	[19.6 - 25.4%]	0.6987	0	0.02
Bradyrhizobium daqingense CGMCC 1.10947	Bradyrhizobium_elkanii_UASWS1015	23.3	[20 - 26.9%]	0.6327	0	23.8	[21.5 - 26.2%]	0.1839	0	22.3	[19.5 - 25.4%]	0.7003	0	0.91
Bradyrhizobium daqingense CGMCC 1.10947	Bradyrhizobium_elkanii_USDA_76	24.1	[20.8 - 27.8%]	0.6148	0.01	25.2	[22.8 - 27.7%]	0.1729	0.01	23.2	[20.4 - 26.3%]	0.6814	0	0.02
Bradyrhizobium daqingense CGMCC 1.10947	Bradyrhizobium_elkanii_USDA_94	23.3	[20 - 27%]	0.632	0	24.4	[22.1 - 26.9%]	0.1788	0.01	22.4	[19.6 - 25.5%]	0.6978	0	0.01
Bradyrhizobium daqingense CGMCC 1.10947	Bradyrhizobium_elkanii_USDA_3254	23.3	[20 - 26.9%]	0.6323	0	24.2	[21.9 - 26.6%]	0.1805	0.01	22.4	[19.6 - 25.5%]	0.6987	0	0.05
Bradyrhizobium daqingense CGMCC 1.10947	Bradyrhizobium_elkanii_USDA_3259	23.5	[20.2 - 27.2%]	0.6278	0.01	24.2	[21.9 - 26.6%]	0.1806	0.01	22.5	[19.7 - 25.6%]	0.695	0	0.18
Bradyrhizobium daqingense CGMCC 1.10947	Bradyrhizobium_elkanii_WSM1741	22.6	[19.3 - 26.2%]	0.6483	0	22.6	[20.3 - 25%]	0.194	0	21.6	[18.8 - 24.6%]	0.7165	0	1.64
Bradyrhizobium daqingense CGMCC 1.10947	Bradyrhizobium_elkanii_WSM2783	21.4	[18.1 - 25%]	0.6768	0	23.5	[21.2 - 26%]	0.1858	0	20.7	[17.9 - 23.8%]	0.7369	0	1.38
Bradyrhizobium daqingense CGMCC 1.10947	Bradyrhizobium_embrapense_SEMIA_6208	23.9	[20.6 - 27.6%]	0.6195	0.01	23.7	[21.4 - 26.1%]	0.1847	0	22.8	[20 - 25.9%]	0.6898	0	0.24
Bradyrhizobium daqingense CGMCC 1.10947	Bradyrhizobium_icense_LMTR_13	22.1	[18.9 - 25.8%]	0.6585	0	22.8	[20.6 - 25.3%]	0.1917	0	21.2	[18.5 - 24.3%]	0.724	0	1.71
Bradyrhizobium daqingense CGMCC 1.10947	Bradyrhizobium_japonicum_22	45.9	[42.5 - 49.3%]	0.3394	5.94	34.7	[32.3 - 37.3%]	0.1193	0.6	42.8	[39.8 - 45.8%]	0.4182	0.34	0.79
Bradyrhizobium daqingense CGMCC 1.10947	Bradyrhizobium_japonicum_CCBA_15517	44.3	[41 - 47.8%]	0.3523	4.4	35.8	[33.4 - 38.3%]	0.1149	0.85	41.9	[38.9 - 44.9%]	0.4266	0.26	0.33
Bradyrhizobium daqingense CGMCC 1.10947	Bradyrhizobium_japonicum_CCBAU_15354	44.3	[41 - 47.8%]	0.3523	4.4	36	[33.6 - 38.6%]	0.1139	0.91	41.9	[38.9 - 45%]	0.4261	0.26	0.4
Bradyrhizobium daqingense CGMCC 1.10947	Bradyrhizobium_japonicum_CCBAU_15618	48	[44.6 - 51.4%]	0.3224	8.75	37.1	[34.6 - 39.6%]	0.1098	1.24	45.2	[42.2 - 48.2%]	0.3968	0.73	0.31
Bradyrhizobium daqingense CGMCC 1.10947	Bradyrhizobium_japonicum_CCBAU_25435	46.9	[43.5 - 50.3%]	0.3309	7.21	36.5	[34 - 39%]	0.1123	1.03	44.1	[41.1 - 47.1%]	0.4061	0.53	0.25
Bradyrhizobium daqingense CGMCC 1.10947	Bradyrhizobium_japonicum_CCBAU_83623	44	[40.6 - 47.4%]	0.3551	4.12	35.9	[33.4 - 38.4%]	0.1145	0.87	41.6	[38.6 - 44.6%]	0.429	0.24	0.43
Bradyrhizobium daqingense CGMCC 1.10947	Bradyrhizobium_japonicum_E109	50.8	[47.4 - 54.3%]	0.3006	14.05	36.9	[34.4 - 39.4%]	0.1106	1.17	47.4	[44.4 - 50.5%]	0.378	1.39	0.07
Bradyrhizobium daqingense CGMCC 1.10947	Bradyrhizobium_japonicum_FN1	50.5	[47 - 53.9%]	0.3035	13.23	36.7	[34.2 - 39.2%]	0.1114	1.1	47	[44 - 50.1%]	0.3811	1.25	0.05
Bradyrhizobium daqingense CGMCC 1.10947	Bradyrhizobium_japonicum_in8p8	43.2	[39.8 - 46.6%]	0.3624	3.46	33.9	[31.5 - 36.4%]	0.123	0.46	40.4	[37.4 - 43.4%]	0.4409	0.16	0.05
Bradyrhizobium daqingense CGMCC 1.10947	Bradyrhizobium_japonicum_Is-1	51.2	[47.7 - 54.6%]	0.2983	14.74	37.5	[35 - 40%]	0.1084	1.38	47.8	[44.8 - 50.9%]	0.3744	1.57	0.26
Bradyrhizobium daqingense CGMCC 1.10947	Bradyrhizobium_japonicum_is5	43.3	[39.9 - 46.7%]	0.3618	3.52	33.9	[31.5 - 36.4%]	0.123	0.45	40.4	[37.5 - 43.5%]	0.4403	0.16	0.06
Bradyrhizobium daqingense CGMCC 1.10947	Bradyrhizobium_japonicum_Is-34	44.1	[40.7 - 47.5%]	0.3544	4.19	36.3	[33.8 - 38.8%]	0.1129	0.98	41.8	[38.8 - 44.8%]	0.4273	0.25	0.69
Bradyrhizobium daqingense CGMCC 1.10947	Bradyrhizobium_japonicum_SEMIA_5079	49.8	[46.4 - 53.3%]	0.3082	11.96	37.2	[34.7 - 39.7%]	0.1094	1.28	46.7	[43.7 - 49.7%]	0.3839	1.14	0.19
Bradyrhizobium daqingense CGMCC 1.10947	Bradyrhizobium_japonicum_USDA_4	57.3	[53.7 - 60.8%]	0.2569	32.33	38.3	[35.9 - 40.8%]	0.1053	1.75	53	[49.9 - 56.1%]	0.3351	5.96	0.06
Bradyrhizobium daqingense CGMCC 1.10947	Bradyrhizobium_japonicum_USDA_6	50.4	[47 - 53.9%]	0.3036	13.2	36.7	[34.3 - 39.2%]	0.1112	1.12	47	[44 - 50.1%]	0.381	1.25	0.07
Bradyrhizobium daqingense CGMCC 1.10947	Bradyrhizobium_japonicum_USDA_38	48.9	[45.5 - 52.4%]	0.3149	10.33	37.1	[34.6 - 39.6%]	0.11	1.23	45.9	[42.9 - 49%]	0.3902	0.91	0.2
Bradyrhizobium daqingense CGMCC 1.10947	Bradyrhizobium_japonicum_USDA_122	51.3	[47.8 - 54.7%]	0.2974	15.02	37.5	[35 - 40%]	0.1083	1.39	48	[44.9 - 51%]	0.3735	1.62	0.27
Bradyrhizobium daqingense CGMCC 1.10947	Bradyrhizobium_japonicum_USDA_123	43.1	[39.7 - 46.5%]	0.3636	3.37	35.8	[33.4 - 38.4%]	0.1147	0.85	40.8	[37.8 - 43.8%]	0.4367	0.18	0.46
Bradyrhizobium daqingense CGMCC 1.10947	Bradyrhizobium_japonicum_USDA_124	56	[52.5 - 59.5%]	0.2649	28.2	37.7	[35.3 - 40.3%]	0.1074	1.5	51.8	[48.7 - 54.9%]	0.3438	4.46	0.32
Bradyrhizobium daqingense CGMCC 1.10947	Bradyrhizobium_japonicum_USDA_135	52.7	[49.2 - 56.2%]	0.2873	18.49	37	[34.5 - 39.5%]	0.1102	1.21	48.9	[45.9 - 52%]	0.3658	2.12	0.23
Bradyrhizobium daqingense CGMCC 1.10947	Bradyrhizobium_jicamae_PAC68	22.7	[19.5 - 26.4%]	0.6448	0	23	[20.7 - 25.5%]	0.1901	0	21.7	[19 - 24.8%]	0.7124	0	1.33
Bradyrhizobium daqingense CGMCC 1.10947	Bradyrhizobium_liaoningense_CCBAU_05525	50.7	[47.3 - 54.2%]	0.3013	13.84	37.3	[34.8 - 39.8%]	0.109	1.32	47.5	[44.4 - 50.5%]	0.3775	1.42	0.07
Bradyrhizobium daqingense CGMCC 1.10947	Bradyrhizobium_liaoningense_CCBAU_83689	50.3	[46.8 - 53.7%]	0.305	12.82	37	[34.5 - 39.5%]	0.1102	1.21	47	[44 - 50%]	0.3815	1.23	0.1
Bradyrhizobium daqingense CGMCC 1.10947	Bradyrhizobium_liaoningense_CCNWSX0360	48.7	[45.3 - 52.1%]	0.3169	9.88	35.1	[32.6 - 37.6%]	0.1179	0.67	45.1	[42.1 - 48.1%]	0.3975	0.71	0.02
Bradyrhizobium daqingense CGMCC 1.10947	Rhizobium_lupini_HPC_L_OUTGROUP	12.8	[10.1 - 16.1%]	0.9839	0	17.3	[15.2 - 19.6%]	0.2539	0	13.1	[10.8 - 15.9%]	0.988	0	4.52
Bradyrhizobium daqingense CGMCC 1.10947	Bradyrhizobium_manausense_BR3351	36	[32.7 - 39.5%]	0.4348	0.6	30.9	[28.5 - 33.4%]	0.1376	0.15	33.9	[30.9 - 36.9%]	0.5125	0.01	0.87
Bradyrhizobium daqingense CGMCC 1.10947	Bradyrhizobium_neotropicale_BR_10247	38.3	[34.9 - 41.8%]	0.4097	1.11	30.8	[28.4 - 33.3%]	0.1379	0.15	35.7	[32.7 - 38.7%]	0.4911	0.03	0.14
Bradyrhizobium daqingense CGMCC 1.10947	Bradyrhizobium_oligotrophicum_S58	21.4	[18.2 - 25.1%]	0.6746	0	22.8	[20.5 - 25.2%]	0.1925	0	20.7	[17.9 - 23.7%]	0.7373	0	1.39
Bradyrhizobium daqingense CGMCC 1.10947	Bradyrhizobium_pachyrhizi_BR3262	23.6	[20.3 - 27.2%]	0.6263	0.01	24.1	[21.8 - 26.6%]	0.181	0.01	22.6	[19.8 - 25.7%]	0.6939	0	0.03
Bradyrhizobium daqingense CGMCC 1.10947	Bradyrhizobium_pachyrhizi_PAC_48	23.5	[20.2 - 27.1%]	0.6286	0.01	23.9	[21.6 - 26.4%]	0.1824	0	22.5	[19.7 - 25.6%]	0.6964	0	0.03
Bradyrhizobium daqingense CGMCC 1.10947	Bradyrhizobium_paxllaeri_LMTR_21	22.9	[19.6 - 26.6%]	0.6406	0	23	[20.7 - 25.4%]	0.1906	0	21.9	[19.1 - 25%]	0.7091	0	1.24
Bradyrhizobium daqingense CGMCC 1.10947	Bradyrhizobium_retamae_Ro19	22	[18.7 - 25.6%]	0.6625	0	22.5	[20.2 - 24.9%]	0.1951	0	21.1	[18.3 - 24.1%]	0.7283	0	1.87
Bradyrhizobium daqingense CGMCC 1.10947	Bradyrhizobium_sp_17-4	20.4	[17.2 - 24%]	0.7022	0	25.1	[22.8 - 27.6%]	0.1733	0.01	20	[17.3 - 23.1%]	0.7538	0	0.14
Bradyrhizobium daqingense CGMCC 1.10947	Bradyrhizobium_sp_Ai1a-2	21.9	[18.7 - 25.6%]	0.6632	0	23.6	[21.3 - 26%]	0.1854	0	21.2	[18.4 - 24.2%]	0.7257	0	1.16
Bradyrhizobium daqingense CGMCC 1.10947	Bradyrhizobium_sp_ARR65	19.4	[16.2 - 23%]	0.7291	0	22.5	[20.2 - 24.9%]	0.195	0	18.9	[16.3 - 22%]	0.782	0	1.72
Bradyrhizobium daqingense CGMCC 1.10947	Bradyrhizobium_sp_AT1	49.7	[46.3 - 53.1%]	0.3091	11.73	34.6	[32.2 - 37.2%]	0.1197	0.59	45.8	[42.8 - 48.8%]	0.3918	0.86	0.82
Bradyrhizobium daqingense CGMCC 1.10947	Bradyrhizobium_sp_BF49	44.5	[41.1 - 47.9%]	0.3509	4.54	32.7	[30.3 - 35.2%]	0.1283	0.3	41.1	[38.1 - 44.1%]	0.4342	0.2	0.04
Bradyrhizobium daqingense CGMCC 1.10947	Bradyrhizobium_sp_BR_10245	35.3	[31.9 - 38.8%]	0.4432	0.49	31.1	[28.7 - 33.6%]	0.1364	0.16	33.3	[30.4 - 36.4%]	0.5192	0.01	0.51
Bradyrhizobium daqingense CGMCC 1.10947	Bradyrhizobium_sp_BR_10303	22.4	[19.2 - 26.1%]	0.6514	0	23.6	[21.3 - 26.1%]	0.1851	0	21.6	[18.8 - 24.7%]	0.716	0	0.49
Bradyrhizobium daqingense CGMCC 1.10947	Bradyrhizobium_sp_CCBAU_15544	58.3	[54.7 - 61.8%]	0.2505	35.87	38.2	[35.8 - 40.7%]	0.1056	1.71	53.8	[50.6 - 56.8%]	0.3297	7.12	0
Bradyrhizobium daqingense CGMCC 1.10947	Bradyrhizobium_sp_CCBAU_15615	56.5	[52.9 - 60%]	0.262	29.68	38.5	[36.1 - 41.1%]	0.1045	1.85	52.4	[49.3 - 55.5%]	0.3391	5.22	0.06
Bradyrhizobium daqingense CGMCC 1.10947	Bradyrhizobium_sp_CCBAU_15635	59.5	[55.8 - 63%]	0.2431	40.13	38.3	[35.8 - 40.8%]	0.1053	1.75	54.7	[51.6 - 57.8%]	0.3228	8.88	0.08
Bradyrhizobium daqingense CGMCC 1.10947	Bradyrhizobium_sp_CCBAU_41267	49.9	[46.4 - 53.3%]	0.308	12.01	37.5	[35.1 - 40.1%]	0.1081	1.41	46.8	[43.8 - 49.9%]	0.3828	1.18	0.27
Bradyrhizobium daqingense CGMCC 1.10947	Bradyrhizobium_sp_CCBAU_43298	55.8	[52.3 - 59.3%]	0.2661	27.6	38.1	[35.6 - 40.6%]	0.1062	1.64	51.8	[48.7 - 54.8%]	0.344	4.43	0.14
Bradyrhizobium daqingense CGMCC 1.10947	Bradyrhizobium_sp_CCGE-LA001	64.4	[60.6 - 68%]	0.2141	57.75	57.1	[54.3 - 59.8%]	0.0569	42.24	64.6	[61.2 - 67.8%]	0.2588	47.81	0.17
Bradyrhizobium daqingense CGMCC 1.10947	Bradyrhizobium_sp_CCH4-A6	15.1	[12.2 - 18.5%]	0.8767	0	21.2	[19 - 23.6%]	0.2072	0	15.2	[12.7 - 18.1%]	0.9022	0	2.84
Bradyrhizobium daqingense CGMCC 1.10947	Bradyrhizobium_sp_CCH5-F6	46.4	[43 - 49.8%]	0.3349	6.59	35.2	[32.7 - 37.7%]	0.1175	0.69	43.3	[40.3 - 46.4%]	0.413	0.41	0.39
Bradyrhizobium daqingense CGMCC 1.10947	Bradyrhizobium_sp_CCH10-C7	15.1	[12.2 - 18.5%]	0.8764	0	21.2	[19 - 23.6%]	0.207	0	15.2	[12.7 - 18.1%]	0.902	0	3.02
Bradyrhizobium daqingense CGMCC 1.10947	Bradyrhizobium_sp_Cp5_3	37.3	[34 - 40.8%]	0.4202	0.86	30.9	[28.5 - 33.4%]	0.1376	0.15	34.9	[32 - 38%]	0.4999	0.02	0.32
Bradyrhizobium daqingense CGMCC 1.10947	Bradyrhizobium_sp_DFCI-1	23.7	[20.4 - 27.3%]	0.624	0.01	23.8	[21.5 - 26.2%]	0.1837	0	22.6	[19.8 - 25.7%]	0.6931	0	0.71
Bradyrhizobium daqingense CGMCC 1.10947	Bradyrhizobium_sp_DOA1	65.6	[61.8 - 69.2%]	0.2075	61.65	56.8	[54 - 59.5%]	0.0574	41.3	65.5	[62.1 - 68.7%]	0.253	52.91	0.08
Bradyrhizobium daqingense CGMCC 1.10947	Bradyrhizobium_sp_DOA9	49.1	[45.7 - 52.6%]	0.3134	10.68	35.4	[32.9 - 37.9%]	0.1167	0.74	45.6	[42.6 - 48.6%]	0.3935	0.81	0.75
Bradyrhizobium daqingense CGMCC 1.10947	Bradyrhizobium_sp_Ec3_3	31	[27.6 - 34.6%]	0.4987	0.13	27.9	[25.5 - 30.4%]	0.1545	0.04	29.2	[26.3 - 32.3%]	0.5762	0	1.09
Bradyrhizobium daqingense CGMCC 1.10947	Bradyrhizobium_sp_G22	42.7	[39.3 - 46.1%]	0.3671	3.1	33.7	[31.3 - 36.2%]	0.1237	0.43	39.9	[37 - 43%]	0.4454	0.13	0
Bradyrhizobium daqingense CGMCC 1.10947	Bradyrhizobium_sp_Leaf396	42.3	[39 - 45.8%]	0.3701	2.89	33.9	[31.4 - 36.4%]	0.1231	0.45	39.7	[36.7 - 42.7%]	0.4476	0.12	0.05
Bradyrhizobium daqingense CGMCC 1.10947	Bradyrhizobium_sp_LMTR_3	22.6	[19.3 - 26.2%]	0.6475	0	22.7	[20.4 - 25.2%]	0.1928	0	21.6	[18.8 - 24.7%]	0.7155	0	1.46
Bradyrhizobium daqingense CGMCC 1.10947	Bradyrhizobium_sp_LTSP849	39.6	[36.2 - 43.1%]	0.3963	1.54	31.4	[29 - 33.9%]	0.1347	0.19	36.9	[33.9 - 39.9%]	0.4776	0.04	0.49
Bradyrhizobium daqingense CGMCC 1.10947	Bradyrhizobium_sp_LTSP857	40.2	[36.9 - 43.7%]	0.39	1.79	31.3	[28.9 - 33.9%]	0.135	0.18	37.3	[34.4 - 40.4%]	0.4724	0.05	0.45
Bradyrhizobium daqingense CGMCC 1.10947	Bradyrhizobium_sp_LTSP885	23.5	[20.2 - 27.1%]	0.6286	0.01	23.3	[21 - 25.8%]	0.1875	0	22.4	[19.6 - 25.5%]	0.6982	0	0.35
Bradyrhizobium daqingense CGMCC 1.10947	Bradyrhizobium_sp_LTSPM299	22.2	[18.9 - 25.8%]	0.6577	0	23.3	[21 - 25.7%]	0.188	0	21.3	[18.5 - 24.4%]	0.722	0	0.92
Bradyrhizobium daqingense CGMCC 1.10947	Bradyrhizobium_sp_OHSU_III	23.5	[20.2 - 27.1%]	0.6289	0.01	23.8	[21.5 - 26.2%]	0.1839	0	22.4	[19.6 - 25.5%]	0.6971	0	0.98
Bradyrhizobium daqingense CGMCC 1.10947	Bradyrhizobium_sp_ORS_278	21.5	[18.3 - 25.2%]	0.6723	0	23	[20.8 - 25.5%]	0.1899	0	20.8	[18 - 23.9%]	0.7345	0	1.78
Bradyrhizobium daqingense CGMCC 1.10947	Bradyrhizobium_sp_ORS_285	21.9	[18.7 - 25.5%]	0.6635	0	22.8	[20.5 - 25.3%]	0.1919	0	21.1	[18.3 - 24.1%]	0.7281	0	1.5
Bradyrhizobium daqingense CGMCC 1.10947	Bradyrhizobium_sp_ORS_375	21.3	[18.1 - 25%]	0.677	0	23.2	[20.9 - 25.7%]	0.1885	0	20.7	[17.9 - 23.7%]	0.7379	0	1.76
Bradyrhizobium daqingense CGMCC 1.10947	Bradyrhizobium_sp_S23321	47.2	[43.8 - 50.6%]	0.3285	7.62	32.7	[30.2 - 35.2%]	0.1286	0.3	43.1	[40.1 - 46.2%]	0.4149	0.39	0.56
Bradyrhizobium daqingense CGMCC 1.10947	Bradyrhizobium_sp_STM_3809	21.8	[18.6 - 25.5%]	0.6656	0	23.6	[21.3 - 26%]	0.1856	0	21.1	[18.3 - 24.1%]	0.7277	0	2.45
Bradyrhizobium daqingense CGMCC 1.10947	Bradyrhizobium_sp_STM_3843	20	[16.8 - 23.6%]	0.7112	0	22.8	[20.5 - 25.2%]	0.1924	0	19.5	[16.8 - 22.5%]	0.7667	0	0.13
Bradyrhizobium daqingense CGMCC 1.10947	Bradyrhizobium_sp_th_b2	22.9	[19.6 - 26.5%]	0.6415	0	24	[21.7 - 26.5%]	0.1819	0	22	[19.2 - 25.1%]	0.7067	0	0.47
Bradyrhizobium daqingense CGMCC 1.10947	Bradyrhizobium_sp_Tv2a-2	20.9	[17.6 - 24.5%]	0.6891	0	22.5	[20.2 - 25%]	0.1947	0	20.2	[17.4 - 23.2%]	0.7496	0	1.54
Bradyrhizobium daqingense CGMCC 1.10947	Bradyrhizobium_sp_URHA0002	21.2	[18 - 24.8%]	0.6805	0	22.6	[20.3 - 25%]	0.1941	0	20.5	[17.7 - 23.5%]	0.7425	0	1.54
Bradyrhizobium daqingense CGMCC 1.10947	Bradyrhizobium_sp_URHA0013	48.6	[45.2 - 52.1%]	0.3173	9.8	32.5	[30.1 - 35%]	0.1293	0.28	44.2	[41.2 - 47.2%]	0.4056	0.54	0.03
Bradyrhizobium daqingense CGMCC 1.10947	Bradyrhizobium_sp_URHD0069	18	[14.9 - 21.6%]	0.7702	0	21.6	[19.4 - 24.1%]	0.2029	0	17.7	[15.1 - 20.7%]	0.8168	0	3.06
Bradyrhizobium daqingense CGMCC 1.10947	Bradyrhizobium_sp_USDA_3384	43.8	[40.4 - 47.3%]	0.3568	3.96	33.9	[31.4 - 36.4%]	0.1231	0.45	40.9	[37.9 - 43.9%]	0.4359	0.19	0.17
Bradyrhizobium daqingense CGMCC 1.10947	Bradyrhizobium_sp_WSM471	43.9	[40.5 - 47.3%]	0.3563	4	32.7	[30.3 - 35.2%]	0.1283	0.3	40.6	[37.6 - 43.6%]	0.4389	0.17	0.33
Bradyrhizobium daqingense CGMCC 1.10947	Bradyrhizobium_sp_WSM1253	41.8	[38.4 - 45.2%]	0.3755	2.54	32.5	[30.1 - 35%]	0.1293	0.28	38.9	[35.9 - 41.9%]	0.4563	0.09	0.59
Bradyrhizobium daqingense CGMCC 1.10947	Bradyrhizobium_sp_WSM1417	42.9	[39.5 - 46.3%]	0.3654	3.23	32.8	[30.4 - 35.3%]	0.128	0.31	39.8	[36.8 - 42.8%]	0.4466	0.13	0.57
Bradyrhizobium daqingense CGMCC 1.10947	Bradyrhizobium_sp_WSM1743	48.9	[45.5 - 52.3%]	0.3152	10.26	35.6	[33.2 - 38.2%]	0.1155	0.81	45.5	[42.5 - 48.5%]	0.3943	0.79	0.35
Bradyrhizobium daqingense CGMCC 1.10947	Bradyrhizobium_sp_WSM2254	42	[38.6 - 45.4%]	0.3733	2.67	34.6	[32.2 - 37.1%]	0.1199	0.58	39.6	[36.7 - 42.7%]	0.4485	0.12	0.15
Bradyrhizobium daqingense CGMCC 1.10947	Bradyrhizobium_sp_WSM2793	49.7	[46.3 - 53.2%]	0.3088	11.8	34.8	[32.4 - 37.3%]	0.119	0.62	45.8	[42.8 - 48.9%]	0.3911	0.89	0.21
Bradyrhizobium daqingense CGMCC 1.10947	Bradyrhizobium_sp_WSM3983	37.1	[33.7 - 40.6%]	0.4233	0.8	31.5	[29.1 - 34%]	0.1342	0.19	34.9	[31.9 - 37.9%]	0.5006	0.02	0.76
Bradyrhizobium daqingense CGMCC 1.10947	Bradyrhizobium_sp_WSM4349	42.6	[39.3 - 46.1%]	0.3675	3.07	32.4	[30 - 34.9%]	0.1298	0.27	39.5	[36.5 - 42.6%]	0.4496	0.12	0.6
Bradyrhizobium daqingense CGMCC 1.10947	Bradyrhizobium_sp_YR681	45.6	[42.2 - 49%]	0.3418	5.62	33.8	[31.4 - 36.3%]	0.1233	0.45	42.3	[39.3 - 45.3%]	0.4229	0.29	0.99
Bradyrhizobium daqingense CGMCC 1.10947	Bradyrhizobium_stylosanthis_BR_446	44.8	[41.5 - 48.3%]	0.348	4.86	34.2	[31.7 - 36.7%]	0.1218	0.5	41.8	[38.8 - 44.8%]	0.4274	0.25	0.82
Bradyrhizobium daqingense CGMCC 1.10947	Bradyrhizobium_tropiciagri_SEMIA_6148	22.4	[19.1 - 26%]	0.6526	0	24	[21.7 - 26.4%]	0.1821	0	21.6	[18.8 - 24.7%]	0.7159	0	0.24
Bradyrhizobium daqingense CGMCC 1.10947	Bradyrhizobium_valentinum_LmjM3	21.5	[18.2 - 25.1%]	0.6744	0	22.8	[20.5 - 25.2%]	0.1921	0	20.7	[17.9 - 23.8%]	0.7369	0	1.81
Bradyrhizobium daqingense CGMCC 1.10947	Bradyrhizobium_valentinum_LmjM6	21.6	[18.4 - 25.3%]	0.6698	0	22.7	[20.5 - 25.2%]	0.1926	0	20.8	[18.1 - 23.9%]	0.7334	0	1.85
Bradyrhizobium daqingense CGMCC 1.10947	Bradyrhizobium_viridifuturi_SEMIA_690	23.4	[20.1 - 27.1%]	0.63	0.01	23.8	[21.5 - 26.3%]	0.1834	0	22.4	[19.6 - 25.5%]	0.6979	0	0.29
Bradyrhizobium daqingense CGMCC 1.10947	Bradyrhizobium_yuanmingense_BR3267	53.3	[49.8 - 56.8%]	0.2832	20.05	34.8	[32.3 - 37.3%]	0.1192	0.61	48.6	[45.5 - 51.6%]	0.3686	1.92	0.13
Bradyrhizobium daqingense CGMCC 1.10947	Bradyrhizobium_yuanmingense_CCBAU_05623	54.9	[51.4 - 58.4%]	0.2725	24.6	35.9	[33.5 - 38.4%]	0.1145	0.87	50.2	[47.2 - 53.3%]	0.3557	2.99	0.05
Bradyrhizobium daqingense CGMCC 1.10947	Bradyrhizobium_yuanmingense_CCBAU_25021	53.8	[50.3 - 57.2%]	0.28	21.33	35.1	[32.7 - 37.6%]	0.1176	0.69	49.1	[46 - 52.1%]	0.3647	2.2	0.07
Bradyrhizobium daqingense CGMCC 1.10947	Bradyrhizobium_yuanmingense_CCBAU_35157	54.5	[50.9 - 57.9%]	0.2753	23.31	35	[32.5 - 37.5%]	0.1183	0.65	49.5	[46.5 - 52.6%]	0.3611	2.49	0.2
Bradyrhizobium erythrophlei GAS138	Bradyrhizobium erythrophlei GAS242	27.1	[23.7 - 30.7%]	0.56	0.03	28.1	[25.8 - 30.6%]	0.153	0.05	26	[23.1 - 29.1%]	0.6273	0	0.52
Bradyrhizobium erythrophlei GAS138	Bradyrhizobium erythrophlei GAS401	18.6	[15.5 - 22.2%]	0.7502	0	23.4	[21.1 - 25.9%]	0.1866	0	18.4	[15.7 - 21.4%]	0.7968	0	0.25
Bradyrhizobium erythrophlei GAS138	Bradyrhizobium erythrophlei MT12	19.6	[16.4 - 23.2%]	0.723	0	23.6	[21.3 - 26%]	0.1856	0	19.2	[16.5 - 22.2%]	0.7744	0	2.41
Bradyrhizobium erythrophlei GAS138	Bradyrhizobium huanghuaihaiense CGMCC 1.10948	18.4	[15.3 - 22%]	0.7572	0	22.2	[20 - 24.7%]	0.1971	0	18.1	[15.5 - 21.1%]	0.8051	0	2.53
Bradyrhizobium erythrophlei GAS138	Bradyrhizobium lablabi GAS522	22.6	[19.3 - 26.2%]	0.6485	0	25.4	[23.1 - 27.9%]	0.1712	0.01	21.9	[19.1 - 25%]	0.7087	0	0.93
Bradyrhizobium erythrophlei GAS138	Bradyrhizobium ottawaense GAS524	22.6	[19.3 - 26.2%]	0.6486	0	25.4	[23 - 27.8%]	0.1715	0.01	21.9	[19.1 - 25%]	0.7089	0	0.9
Bradyrhizobium erythrophlei GAS138	Bradyrhizobium sp. CF659	18.9	[15.8 - 22.5%]	0.7429	0	22.5	[20.3 - 25%]	0.1944	0	18.6	[15.9 - 21.6%]	0.7929	0	3.11
Bradyrhizobium erythrophlei GAS138	Bradyrhizobium sp. ERR11	18.3	[15.2 - 21.8%]	0.7612	0	22.2	[19.9 - 24.6%]	0.1976	0	18	[15.4 - 21%]	0.8084	0	1.81
Bradyrhizobium erythrophlei GAS138	Bradyrhizobium sp. Gha	17.9	[14.8 - 21.4%]	0.7736	0	21.9	[19.7 - 24.4%]	0.2001	0	17.7	[15 - 20.6%]	0.8189	0	1.46
Bradyrhizobium erythrophlei GAS138	Bradyrhizobium sp. Ghvi	18.1	[15 - 21.6%]	0.7685	0	21.7	[19.5 - 24.2%]	0.2018	0	17.8	[15.1 - 20.8%]	0.8152	0	1.62
Bradyrhizobium erythrophlei GAS138	Bradyrhizobium sp. OK095	18.5	[15.4 - 22.1%]	0.7541	0	22	[19.7 - 24.4%]	0.1998	0	18.2	[15.5 - 21.2%]	0.8033	0	2.48
Bradyrhizobium erythrophlei GAS138	Bradyrhizobium sp. R5	18.9	[15.8 - 22.5%]	0.7418	0	23.6	[21.3 - 26%]	0.1853	0	18.7	[16 - 21.7%]	0.7897	0	2.24
Bradyrhizobium erythrophlei GAS138	Bradyrhizobium sp. Rc2d	17.9	[14.8 - 21.4%]	0.7741	0	22.3	[20 - 24.8%]	0.1964	0	17.7	[15 - 20.7%]	0.8185	0	1.41
Bradyrhizobium erythrophlei GAS138	Bradyrhizobium sp. Rc3b	18.6	[15.5 - 22.2%]	0.7509	0	22.3	[20 - 24.7%]	0.1967	0	18.3	[15.6 - 21.3%]	0.7999	0	2.26
Bradyrhizobium erythrophlei GAS138	Bradyrhizobium yuanmingense CCBAU 10071	18.2	[15.1 - 21.8%]	0.7633	0	22	[19.8 - 24.5%]	0.1991	0	17.9	[15.3 - 20.9%]	0.8105	0	2.36
Bradyrhizobium erythrophlei GAS138	Bradyrhizobium yuanmingense CGMCC 1.3531	18.2	[15.1 - 21.8%]	0.7635	0	22	[19.8 - 24.5%]	0.1991	0	17.9	[15.3 - 20.9%]	0.8106	0	2.36
Bradyrhizobium erythrophlei GAS138	Mesorhizobium_ciceri_WSM1271_OUTGROUP	12.9	[10.2 - 16.2%]	0.9785	0	19.1	[16.9 - 21.5%]	0.2301	0	13.2	[10.9 - 16%]	0.9835	0	1.15
Bradyrhizobium erythrophlei GAS138	Bradyrhizobium_diazoefficiens_SEMIA_5080	18.6	[15.5 - 22.1%]	0.7525	0	22.5	[20.2 - 24.9%]	0.1951	0	18.3	[15.6 - 21.3%]	0.8008	0	2.57
Bradyrhizobium erythrophlei GAS138	Bradyrhizobium_diazoefficiens_USDA_110	18.5	[15.4 - 22%]	0.7552	0	22.5	[20.2 - 25%]	0.1947	0	18.2	[15.5 - 21.2%]	0.8029	0	2.65
Bradyrhizobium erythrophlei GAS138	Bradyrhizobium_elkanii_587	17.5	[14.5 - 21.1%]	0.7859	0	24.2	[21.9 - 26.7%]	0.1804	0.01	17.5	[14.9 - 20.5%]	0.8245	0	2.23
Bradyrhizobium erythrophlei GAS138	Bradyrhizobium_elkanii_BLY3-8	19	[15.9 - 22.6%]	0.7384	0	23.6	[21.3 - 26.1%]	0.1849	0	18.8	[16.1 - 21.8%]	0.7868	0	2.4
Bradyrhizobium erythrophlei GAS138	Bradyrhizobium_elkanii_BLY6-1	19	[15.9 - 22.6%]	0.7383	0	23.6	[21.3 - 26.1%]	0.185	0	18.8	[16.1 - 21.8%]	0.7867	0	2.39
Bradyrhizobium erythrophlei GAS138	Bradyrhizobium_elkanii_CCBAU_05737	18.5	[15.4 - 22.1%]	0.7538	0	23.6	[21.3 - 26%]	0.1856	0	18.3	[15.7 - 21.3%]	0.7995	0	2.1
Bradyrhizobium erythrophlei GAS138	Bradyrhizobium_elkanii_CCBAU_43297	18.8	[15.6 - 22.4%]	0.7464	0	23.7	[21.4 - 26.2%]	0.1841	0	18.5	[15.9 - 21.6%]	0.7931	0	2.34
Bradyrhizobium erythrophlei GAS138	Bradyrhizobium_elkanii_UASWS1015	19.4	[16.3 - 23%]	0.7269	0	23	[20.8 - 25.5%]	0.19	0	19.1	[16.4 - 22.1%]	0.7788	0	3.23
Bradyrhizobium erythrophlei GAS138	Bradyrhizobium_elkanii_USDA_76	19.1	[15.9 - 22.7%]	0.7372	0	23.6	[21.3 - 26.1%]	0.1852	0	18.8	[16.1 - 21.8%]	0.7859	0	2.31
Bradyrhizobium erythrophlei GAS138	Bradyrhizobium_elkanii_USDA_94	18.9	[15.8 - 22.5%]	0.7425	0	23.6	[21.3 - 26%]	0.1855	0	18.6	[16 - 21.7%]	0.7903	0	2.33
Bradyrhizobium erythrophlei GAS138	Bradyrhizobium_elkanii_USDA_3254	19.2	[16.1 - 22.8%]	0.733	0	23.4	[21.1 - 25.9%]	0.1869	0	18.9	[16.2 - 21.9%]	0.7829	0	2.37
Bradyrhizobium erythrophlei GAS138	Bradyrhizobium_elkanii_USDA_3259	19.4	[16.2 - 23%]	0.7292	0	23.4	[21.1 - 25.9%]	0.1869	0	19	[16.3 - 22%]	0.7798	0	2.5
Bradyrhizobium erythrophlei GAS138	Bradyrhizobium_elkanii_WSM1741	19.9	[16.7 - 23.5%]	0.7148	0	23.8	[21.5 - 26.3%]	0.1835	0	19.5	[16.8 - 22.5%]	0.7671	0	0.68
Bradyrhizobium erythrophlei GAS138	Bradyrhizobium_elkanii_WSM2783	19.1	[15.9 - 22.7%]	0.7378	0	23.7	[21.4 - 26.2%]	0.1843	0	18.8	[16.1 - 21.8%]	0.7861	0	0.94
Bradyrhizobium erythrophlei GAS138	Bradyrhizobium_embrapense_SEMIA_6208	19.3	[16.1 - 22.9%]	0.7313	0	23.3	[21 - 25.7%]	0.1881	0	19	[16.3 - 22%]	0.7818	0	2.57
Bradyrhizobium erythrophlei GAS138	Bradyrhizobium_icense_LMTR_13	19.7	[16.5 - 23.3%]	0.721	0	23.7	[21.4 - 26.2%]	0.1842	0	19.3	[16.6 - 22.3%]	0.7724	0	0.61
Bradyrhizobium erythrophlei GAS138	Bradyrhizobium_japonicum_22	18.4	[15.3 - 22%]	0.7563	0	22.4	[20.1 - 24.8%]	0.1961	0	18.2	[15.5 - 21.2%]	0.8041	0	3.12
Bradyrhizobium erythrophlei GAS138	Bradyrhizobium_japonicum_CCBA_15517	17.8	[14.7 - 21.3%]	0.7779	0	22.4	[20.1 - 24.9%]	0.1956	0	17.6	[15 - 20.6%]	0.8213	0	1.99
Bradyrhizobium erythrophlei GAS138	Bradyrhizobium_japonicum_CCBAU_15354	17.8	[14.7 - 21.3%]	0.7775	0	22.4	[20.2 - 24.9%]	0.1953	0	17.6	[15 - 20.6%]	0.8209	0	1.92
Bradyrhizobium erythrophlei GAS138	Bradyrhizobium_japonicum_CCBAU_15618	17.8	[14.7 - 21.3%]	0.777	0	22.5	[20.2 - 25%]	0.1945	0	17.6	[15 - 20.6%]	0.8204	0	2.01
Bradyrhizobium erythrophlei GAS138	Bradyrhizobium_japonicum_CCBAU_25435	18	[14.9 - 21.6%]	0.7696	0	22.4	[20.2 - 24.9%]	0.1952	0	17.8	[15.2 - 20.8%]	0.8146	0	2.07
Bradyrhizobium erythrophlei GAS138	Bradyrhizobium_japonicum_CCBAU_83623	17.6	[14.6 - 21.2%]	0.7819	0	22.4	[20.2 - 24.9%]	0.1954	0	17.5	[14.9 - 20.5%]	0.8246	0	1.9
Bradyrhizobium erythrophlei GAS138	Bradyrhizobium_japonicum_E109	18.4	[15.3 - 22%]	0.7564	0	22.3	[20 - 24.7%]	0.1966	0	18.2	[15.5 - 21.2%]	0.8043	0	2.25
Bradyrhizobium erythrophlei GAS138	Bradyrhizobium_japonicum_FN1	18.4	[15.3 - 22%]	0.7571	0	22.3	[20 - 24.7%]	0.1966	0	18.1	[15.5 - 21.1%]	0.8048	0	2.28
Bradyrhizobium erythrophlei GAS138	Bradyrhizobium_japonicum_in8p8	17.7	[14.6 - 21.3%]	0.7794	0	21.9	[19.6 - 24.3%]	0.2007	0	17.5	[14.9 - 20.5%]	0.8237	0	2.37
Bradyrhizobium erythrophlei GAS138	Bradyrhizobium_japonicum_Is-1	18.6	[15.5 - 22.2%]	0.751	0	22.5	[20.2 - 24.9%]	0.1951	0	18.3	[15.7 - 21.3%]	0.7996	0	2.58
Bradyrhizobium erythrophlei GAS138	Bradyrhizobium_japonicum_is5	17.7	[14.7 - 21.3%]	0.7791	0	21.9	[19.6 - 24.3%]	0.2007	0	17.5	[14.9 - 20.5%]	0.8234	0	2.38
Bradyrhizobium erythrophlei GAS138	Bradyrhizobium_japonicum_Is-34	17.9	[14.9 - 21.5%]	0.7721	0	22.4	[20.1 - 24.9%]	0.1955	0	17.7	[15.1 - 20.7%]	0.8166	0	1.64
Bradyrhizobium erythrophlei GAS138	Bradyrhizobium_japonicum_SEMIA_5079	18.3	[15.2 - 21.9%]	0.7594	0	22.4	[20.1 - 24.8%]	0.196	0	18.1	[15.4 - 21.1%]	0.8065	0	2.13
Bradyrhizobium erythrophlei GAS138	Bradyrhizobium_japonicum_USDA_4	18.6	[15.5 - 22.2%]	0.7509	0	22.2	[19.9 - 24.7%]	0.1973	0	18.3	[15.6 - 21.3%]	0.8	0	2.26
Bradyrhizobium erythrophlei GAS138	Bradyrhizobium_japonicum_USDA_6	18.4	[15.3 - 22%]	0.7564	0	22.3	[20 - 24.7%]	0.1966	0	18.2	[15.5 - 21.2%]	0.8043	0	2.25
Bradyrhizobium erythrophlei GAS138	Bradyrhizobium_japonicum_USDA_38	18.2	[15.1 - 21.7%]	0.7643	0	22.4	[20.1 - 24.9%]	0.1956	0	17.9	[15.3 - 20.9%]	0.8104	0	2.13
Bradyrhizobium erythrophlei GAS138	Bradyrhizobium_japonicum_USDA_122	18.6	[15.5 - 22.2%]	0.7516	0	22.5	[20.2 - 24.9%]	0.1951	0	18.3	[15.6 - 21.3%]	0.8	0	2.59
Bradyrhizobium erythrophlei GAS138	Bradyrhizobium_japonicum_USDA_123	18	[14.9 - 21.5%]	0.7716	0	22.3	[20 - 24.7%]	0.1966	0	17.7	[15.1 - 20.7%]	0.8165	0	1.86
Bradyrhizobium erythrophlei GAS138	Bradyrhizobium_japonicum_USDA_124	18.5	[15.4 - 22.1%]	0.755	0	22.2	[20 - 24.7%]	0.197	0	18.2	[15.5 - 21.2%]	0.8033	0	2.64
Bradyrhizobium erythrophlei GAS138	Bradyrhizobium_japonicum_USDA_135	18	[15 - 21.6%]	0.7688	0	22.3	[20.1 - 24.8%]	0.1963	0	17.8	[15.2 - 20.8%]	0.8142	0	2.55
Bradyrhizobium erythrophlei GAS138	Bradyrhizobium_jicamae_PAC68	19.6	[16.5 - 23.2%]	0.7222	0	24	[21.7 - 26.5%]	0.1817	0.01	19.3	[16.6 - 22.3%]	0.7727	0	0.99
Bradyrhizobium erythrophlei GAS138	Bradyrhizobium_liaoningense_CCBAU_05525	17.5	[14.4 - 21%]	0.7872	0	22.5	[20.3 - 25%]	0.1943	0	17.3	[14.7 - 20.3%]	0.8286	0	2.39
Bradyrhizobium erythrophlei GAS138	Bradyrhizobium_liaoningense_CCBAU_83689	17.6	[14.5 - 21.1%]	0.7841	0	22.4	[20.1 - 24.9%]	0.1955	0	17.4	[14.8 - 20.4%]	0.8263	0	2.42
Bradyrhizobium erythrophlei GAS138	Bradyrhizobium_liaoningense_CCNWSX0360	17.9	[14.8 - 21.4%]	0.7742	0	22.4	[20.1 - 24.9%]	0.1956	0	17.7	[15 - 20.7%]	0.8184	0	2.3
Bradyrhizobium erythrophlei GAS138	Rhizobium_lupini_HPC_L_OUTGROUP	12.6	[9.9 - 15.9%]	0.9932	0	18.6	[16.4 - 21%]	0.2366	0	13	[10.7 - 15.7%]	0.9948	0	2.19
Bradyrhizobium erythrophlei GAS138	Bradyrhizobium_manausense_BR3351	17.7	[14.6 - 21.2%]	0.78	0	22.2	[19.9 - 24.6%]	0.1977	0	17.5	[14.9 - 20.5%]	0.8235	0	1.46
Bradyrhizobium erythrophlei GAS138	Bradyrhizobium_neotropicale_BR_10247	18.3	[15.2 - 21.9%]	0.7603	0	22.5	[20.2 - 25%]	0.1945	0	18.1	[15.4 - 21.1%]	0.8069	0	2.19
Bradyrhizobium erythrophlei GAS138	Bradyrhizobium_oligotrophicum_S58	17.1	[14.1 - 20.6%]	0.7999	0	22.1	[19.9 - 24.6%]	0.198	0	17	[14.4 - 20%]	0.8395	0	3.72
Bradyrhizobium erythrophlei GAS138	Bradyrhizobium_pachyrhizi_BR3262	19.4	[16.2 - 23%]	0.7294	0	23.4	[21.1 - 25.9%]	0.1867	0	19	[16.3 - 22%]	0.7799	0	2.35
Bradyrhizobium erythrophlei GAS138	Bradyrhizobium_pachyrhizi_PAC_48	19.3	[16.2 - 22.9%]	0.7311	0	23.3	[21.1 - 25.8%]	0.1873	0	19	[16.3 - 22%]	0.7814	0	2.35
Bradyrhizobium erythrophlei GAS138	Bradyrhizobium_paxllaeri_LMTR_21	19.9	[16.8 - 23.5%]	0.7132	0	23.9	[21.6 - 26.4%]	0.1823	0	19.6	[16.8 - 22.6%]	0.7655	0	1.08
Bradyrhizobium erythrophlei GAS138	Bradyrhizobium_retamae_Ro19	19.4	[16.3 - 23%]	0.727	0	23.9	[21.6 - 26.3%]	0.1831	0	19.1	[16.4 - 22.2%]	0.777	0	0.46
Bradyrhizobium erythrophlei GAS138	Bradyrhizobium_sp_17-4	17.3	[14.2 - 20.8%]	0.7939	0	24.4	[22.1 - 26.9%]	0.1787	0.01	17.3	[14.7 - 20.2%]	0.8307	0	2.46
Bradyrhizobium erythrophlei GAS138	Bradyrhizobium_sp_Ai1a-2	19	[15.8 - 22.5%]	0.7409	0	23.6	[21.3 - 26%]	0.1856	0	18.7	[16 - 21.7%]	0.789	0	1.16
Bradyrhizobium erythrophlei GAS138	Bradyrhizobium_sp_ARR65	18.1	[15 - 21.7%]	0.7664	0	22.6	[20.3 - 25%]	0.1941	0	17.9	[15.3 - 20.9%]	0.8118	0	0.6
Bradyrhizobium erythrophlei GAS138	Bradyrhizobium_sp_AT1	18.6	[15.5 - 22.1%]	0.7522	0	22.4	[20.1 - 24.8%]	0.196	0	18.3	[15.6 - 21.3%]	0.8008	0	3.15
Bradyrhizobium erythrophlei GAS138	Bradyrhizobium_sp_BF49	18.1	[15.1 - 21.7%]	0.7654	0	22.3	[20 - 24.7%]	0.197	0	17.9	[15.3 - 20.9%]	0.8116	0	2.36
Bradyrhizobium erythrophlei GAS138	Bradyrhizobium_sp_BR_10245	18.1	[15 - 21.7%]	0.7668	0	22.7	[20.4 - 25.1%]	0.193	0	17.9	[15.3 - 20.9%]	0.8118	0	1.81
Bradyrhizobium erythrophlei GAS138	Bradyrhizobium_sp_BR_10303	19.1	[16 - 22.7%]	0.7363	0	23.1	[20.8 - 25.5%]	0.1897	0	18.8	[16.1 - 21.8%]	0.7863	0	1.83
Bradyrhizobium erythrophlei GAS138	Bradyrhizobium_sp_CCBAU_15544	18.2	[15.1 - 21.8%]	0.7637	0	22.4	[20.1 - 24.8%]	0.196	0	18	[15.3 - 20.9%]	0.81	0	2.32
Bradyrhizobium erythrophlei GAS138	Bradyrhizobium_sp_CCBAU_15615	18.3	[15.2 - 21.9%]	0.7592	0	22.3	[20.1 - 24.8%]	0.1963	0	18.1	[15.4 - 21.1%]	0.8064	0	2.26
Bradyrhizobium erythrophlei GAS138	Bradyrhizobium_sp_CCBAU_15635	18.4	[15.3 - 22%]	0.7572	0	22.4	[20.1 - 24.8%]	0.1957	0	18.1	[15.5 - 21.1%]	0.8047	0	2.4
Bradyrhizobium erythrophlei GAS138	Bradyrhizobium_sp_CCBAU_41267	18.1	[15 - 21.6%]	0.7683	0	22.6	[20.3 - 25.1%]	0.1938	0	17.9	[15.2 - 20.8%]	0.8132	0	2.59
Bradyrhizobium erythrophlei GAS138	Bradyrhizobium_sp_CCBAU_43298	17.9	[14.8 - 21.4%]	0.7745	0	22.6	[20.3 - 25%]	0.1941	0	17.7	[15.1 - 20.7%]	0.8183	0	2.47
Bradyrhizobium erythrophlei GAS138	Bradyrhizobium_sp_CCGE-LA001	18.1	[15 - 21.7%]	0.7663	0	22.1	[19.8 - 24.5%]	0.1986	0	17.9	[15.2 - 20.9%]	0.8127	0	2.16
Bradyrhizobium erythrophlei GAS138	Bradyrhizobium_sp_CCH4-A6	14.8	[11.9 - 18.2%]	0.8871	0	21.7	[19.4 - 24.1%]	0.2023	0	15	[12.5 - 17.9%]	0.91	0	0.52
Bradyrhizobium erythrophlei GAS138	Bradyrhizobium_sp_CCH5-F6	17.6	[14.6 - 21.2%]	0.7824	0	22.3	[20.1 - 24.8%]	0.1963	0	17.5	[14.8 - 20.4%]	0.8251	0	2.71
Bradyrhizobium erythrophlei GAS138	Bradyrhizobium_sp_CCH10-C7	14.9	[12 - 18.3%]	0.8832	0	21.6	[19.4 - 24.1%]	0.203	0	15.1	[12.6 - 17.9%]	0.9069	0	0.69
Bradyrhizobium erythrophlei GAS138	Bradyrhizobium_sp_Cp5_3	18.2	[15.1 - 21.8%]	0.763	0	22.5	[20.3 - 25%]	0.1943	0	18	[15.3 - 21%]	0.8091	0	2
Bradyrhizobium erythrophlei GAS138	Bradyrhizobium_sp_DFCI-1	19.6	[16.4 - 23.2%]	0.7233	0	23.2	[20.9 - 25.6%]	0.1888	0	19.2	[16.5 - 22.2%]	0.7756	0	3.03
Bradyrhizobium erythrophlei GAS138	Bradyrhizobium_sp_DOA1	18.2	[15.1 - 21.7%]	0.7651	0	22.1	[19.9 - 24.6%]	0.1982	0	17.9	[15.3 - 20.9%]	0.8116	0	2.4
Bradyrhizobium erythrophlei GAS138	Bradyrhizobium_sp_DOA9	18.7	[15.5 - 22.2%]	0.7496	0	22.2	[20 - 24.7%]	0.1973	0	18.3	[15.7 - 21.3%]	0.799	0	3.08
Bradyrhizobium erythrophlei GAS138	Bradyrhizobium_sp_Ec3_3	17.8	[14.7 - 21.3%]	0.777	0	22.4	[20.1 - 24.8%]	0.1956	0	17.6	[15 - 20.6%]	0.8206	0	1.23
Bradyrhizobium erythrophlei GAS138	Bradyrhizobium_sp_G22	18.4	[15.3 - 22%]	0.7566	0	22.4	[20.2 - 24.9%]	0.1952	0	18.2	[15.5 - 21.2%]	0.8041	0	2.32
Bradyrhizobium erythrophlei GAS138	Bradyrhizobium_sp_Leaf396	17.6	[14.6 - 21.2%]	0.7822	0	21.9	[19.7 - 24.4%]	0.2001	0	17.4	[14.8 - 20.4%]	0.8258	0	2.37
Bradyrhizobium erythrophlei GAS138	Bradyrhizobium_sp_LMTR_3	20	[16.8 - 23.6%]	0.7113	0	23.9	[21.6 - 26.4%]	0.1824	0	19.6	[16.9 - 22.7%]	0.7639	0	0.86
Bradyrhizobium erythrophlei GAS138	Bradyrhizobium_sp_LTSP849	18.7	[15.6 - 22.3%]	0.749	0	22.2	[19.9 - 24.6%]	0.1977	0	18.4	[15.7 - 21.4%]	0.7986	0	1.83
Bradyrhizobium erythrophlei GAS138	Bradyrhizobium_sp_LTSP857	18.8	[15.7 - 22.4%]	0.7463	0	22.2	[19.9 - 24.6%]	0.1979	0	18.4	[15.8 - 21.4%]	0.7965	0	1.88
Bradyrhizobium erythrophlei GAS138	Bradyrhizobium_sp_LTSP885	20.2	[17 - 23.8%]	0.707	0	23.3	[21 - 25.8%]	0.1877	0	19.7	[17 - 22.7%]	0.762	0	1.97
Bradyrhizobium erythrophlei GAS138	Bradyrhizobium_sp_LTSPM299	19.6	[16.5 - 23.2%]	0.722	0	23.6	[21.3 - 26%]	0.1856	0	19.3	[16.5 - 22.3%]	0.7736	0	1.41
Bradyrhizobium erythrophlei GAS138	Bradyrhizobium_sp_OHSU_III	19.6	[16.4 - 23.2%]	0.7237	0	23.1	[20.8 - 25.5%]	0.1897	0	19.2	[16.5 - 22.2%]	0.7761	0	3.3
Bradyrhizobium erythrophlei GAS138	Bradyrhizobium_sp_ORS_278	17.1	[14 - 20.6%]	0.8011	0	22.1	[19.8 - 24.5%]	0.1987	0	17	[14.4 - 19.9%]	0.8406	0	4.1
Bradyrhizobium erythrophlei GAS138	Bradyrhizobium_sp_ORS_285	17	[14 - 20.5%]	0.8038	0	22.1	[19.9 - 24.6%]	0.198	0	16.9	[14.3 - 19.9%]	0.8427	0	3.82
Bradyrhizobium erythrophlei GAS138	Bradyrhizobium_sp_ORS_375	16.8	[13.8 - 20.3%]	0.8104	0	22.3	[20.1 - 24.8%]	0.1961	0	16.8	[14.2 - 19.7%]	0.8476	0	4.08
Bradyrhizobium erythrophlei GAS138	Bradyrhizobium_sp_S23321	19	[15.8 - 22.6%]	0.7405	0	22.2	[19.9 - 24.6%]	0.1975	0	18.6	[15.9 - 21.6%]	0.7917	0	2.89
Bradyrhizobium erythrophlei GAS138	Bradyrhizobium_sp_STM_3809	17.3	[14.2 - 20.8%]	0.7939	0	22.5	[20.2 - 25%]	0.1947	0	17.2	[14.6 - 20.1%]	0.834	0	4.77
Bradyrhizobium erythrophlei GAS138	Bradyrhizobium_sp_STM_3843	16.9	[13.9 - 20.4%]	0.8059	0	22.1	[19.9 - 24.6%]	0.1982	0	16.9	[14.3 - 19.8%]	0.8444	0	2.19
Bradyrhizobium erythrophlei GAS138	Bradyrhizobium_sp_th_b2	19	[15.9 - 22.6%]	0.7402	0	23.4	[21.1 - 25.8%]	0.1873	0	18.7	[16 - 21.7%]	0.7888	0	1.86
Bradyrhizobium erythrophlei GAS138	Bradyrhizobium_sp_Tv2a-2	18.2	[15.1 - 21.8%]	0.7637	0	22.5	[20.2 - 24.9%]	0.1948	0	18	[15.3 - 21%]	0.8097	0	0.79
Bradyrhizobium erythrophlei GAS138	Bradyrhizobium_sp_URHA0002	21.1	[17.9 - 24.8%]	0.6819	0	24.1	[21.8 - 26.5%]	0.1813	0.01	20.6	[17.8 - 23.6%]	0.7396	0	0.79
Bradyrhizobium erythrophlei GAS138	Bradyrhizobium_sp_URHA0013	18.6	[15.5 - 22.2%]	0.7508	0	22.1	[19.9 - 24.6%]	0.198	0	18.3	[15.6 - 21.3%]	0.8002	0	2.35
Bradyrhizobium erythrophlei GAS138	Bradyrhizobium_sp_URHD0069	25.1	[21.8 - 28.8%]	0.5954	0.01	28.5	[26.1 - 31%]	0.1507	0.05	24.4	[21.6 - 27.5%]	0.6564	0	0.74
Bradyrhizobium erythrophlei GAS138	Bradyrhizobium_sp_USDA_3384	18.2	[15.1 - 21.8%]	0.763	0	22.4	[20.1 - 24.8%]	0.1958	0	18	[15.3 - 21%]	0.8094	0	2.15
Bradyrhizobium erythrophlei GAS138	Bradyrhizobium_sp_WSM471	18.1	[15 - 21.7%]	0.767	0	22.3	[20 - 24.7%]	0.1966	0	17.9	[15.2 - 20.9%]	0.8128	0	1.99
Bradyrhizobium erythrophlei GAS138	Bradyrhizobium_sp_WSM1253	18	[14.9 - 21.6%]	0.7702	0	22.1	[19.8 - 24.6%]	0.1983	0	17.8	[15.1 - 20.8%]	0.8158	0	1.73
Bradyrhizobium erythrophlei GAS138	Bradyrhizobium_sp_WSM1417	18	[14.9 - 21.6%]	0.7702	0	22.2	[19.9 - 24.6%]	0.1976	0	17.8	[15.1 - 20.8%]	0.8156	0	1.76
Bradyrhizobium erythrophlei GAS138	Bradyrhizobium_sp_WSM1743	17.9	[14.9 - 21.5%]	0.772	0	22.4	[20.1 - 24.8%]	0.1961	0	17.7	[15.1 - 20.7%]	0.8167	0	1.97
Bradyrhizobium erythrophlei GAS138	Bradyrhizobium_sp_WSM2254	18.5	[15.4 - 22.1%]	0.7533	0	22.5	[20.3 - 25%]	0.1944	0	18.3	[15.6 - 21.3%]	0.8012	0	2.47
Bradyrhizobium erythrophlei GAS138	Bradyrhizobium_sp_WSM2793	18.2	[15.1 - 21.8%]	0.7629	0	22.4	[20.1 - 24.8%]	0.196	0	18	[15.3 - 21%]	0.8094	0	2.12
Bradyrhizobium erythrophlei GAS138	Bradyrhizobium_sp_WSM3983	18	[14.9 - 21.5%]	0.7709	0	22.2	[19.9 - 24.6%]	0.1975	0	17.8	[15.1 - 20.7%]	0.8162	0	1.56
Bradyrhizobium erythrophlei GAS138	Bradyrhizobium_sp_WSM4349	18	[14.9 - 21.6%]	0.7702	0	22	[19.7 - 24.4%]	0.1994	0	17.8	[15.1 - 20.7%]	0.816	0	1.72
Bradyrhizobium erythrophlei GAS138	Bradyrhizobium_sp_YR681	18.3	[15.2 - 21.9%]	0.7611	0	22.4	[20.2 - 24.9%]	0.1954	0	18	[15.4 - 21%]	0.8078	0	3.31
Bradyrhizobium erythrophlei GAS138	Bradyrhizobium_stylosanthis_BR_446	18.4	[15.3 - 22%]	0.7569	0	22.4	[20.1 - 24.8%]	0.1958	0	18.1	[15.5 - 21.1%]	0.8045	0	3.14
Bradyrhizobium erythrophlei GAS138	Bradyrhizobium_tropiciagri_SEMIA_6148	18.7	[15.6 - 22.3%]	0.7486	0	23.3	[21 - 25.8%]	0.1876	0	18.4	[15.8 - 21.5%]	0.7958	0	2.08
Bradyrhizobium erythrophlei GAS138	Bradyrhizobium_valentinum_LmjM3	19.9	[16.8 - 23.5%]	0.7136	0	24.3	[22 - 26.8%]	0.1794	0.01	19.6	[16.9 - 22.6%]	0.765	0	0.51
Bradyrhizobium erythrophlei GAS138	Bradyrhizobium_valentinum_LmjM6	19.9	[16.8 - 23.5%]	0.7134	0	24.2	[21.9 - 26.7%]	0.18	0.01	19.6	[16.9 - 22.6%]	0.765	0	0.47
Bradyrhizobium erythrophlei GAS138	Bradyrhizobium_viridifuturi_SEMIA_690	19.1	[15.9 - 22.7%]	0.7376	0	23.3	[21 - 25.7%]	0.1881	0	18.8	[16.1 - 21.8%]	0.787	0	2.61
Bradyrhizobium erythrophlei GAS138	Bradyrhizobium_yuanmingense_BR3267	18.3	[15.2 - 21.9%]	0.7602	0	22.2	[19.9 - 24.6%]	0.1978	0	18	[15.4 - 21%]	0.8076	0	2.46
Bradyrhizobium erythrophlei GAS138	Bradyrhizobium_yuanmingense_CCBAU_05623	17.8	[14.7 - 21.3%]	0.7778	0	22.3	[20 - 24.7%]	0.1966	0	17.6	[15 - 20.6%]	0.8215	0	2.37
Bradyrhizobium erythrophlei GAS138	Bradyrhizobium_yuanmingense_CCBAU_25021	18	[14.9 - 21.6%]	0.7695	0	22.2	[20 - 24.7%]	0.1971	0	17.8	[15.2 - 20.8%]	0.815	0	2.4
Bradyrhizobium erythrophlei GAS138	Bradyrhizobium_yuanmingense_CCBAU_35157	17.9	[14.9 - 21.5%]	0.7718	0	22.2	[19.9 - 24.6%]	0.1975	0	17.7	[15.1 - 20.7%]	0.8169	0	2.52
Bradyrhizobium erythrophlei GAS242	Bradyrhizobium erythrophlei GAS401	19	[15.9 - 22.6%]	0.7383	0	23.3	[21 - 25.7%]	0.1879	0	18.7	[16.1 - 21.8%]	0.7875	0	0.77
Bradyrhizobium erythrophlei GAS242	Bradyrhizobium erythrophlei MT12	21.1	[17.9 - 24.7%]	0.6834	0	23.9	[21.6 - 26.4%]	0.1824	0	20.5	[17.8 - 23.6%]	0.7411	0	1.89
Bradyrhizobium erythrophlei GAS242	Bradyrhizobium huanghuaihaiense CGMCC 1.10948	20.2	[17 - 23.8%]	0.7072	0	22.8	[20.5 - 25.3%]	0.1918	0	19.6	[16.9 - 22.7%]	0.7634	0	2.01
Bradyrhizobium erythrophlei GAS242	Bradyrhizobium lablabi GAS522	24.2	[20.9 - 27.8%]	0.6137	0.01	25.5	[23.1 - 27.9%]	0.1708	0.01	23.3	[20.4 - 26.4%]	0.6797	0	0.41
Bradyrhizobium erythrophlei GAS242	Bradyrhizobium ottawaense GAS524	24.1	[20.8 - 27.8%]	0.6152	0.01	25.5	[23.1 - 27.9%]	0.1708	0.01	23.2	[20.4 - 26.3%]	0.6809	0	0.38
Bradyrhizobium erythrophlei GAS242	Bradyrhizobium sp. CF659	20.7	[17.5 - 24.3%]	0.6927	0	23.1	[20.9 - 25.6%]	0.1891	0	20.1	[17.4 - 23.2%]	0.7508	0	2.59
Bradyrhizobium erythrophlei GAS242	Bradyrhizobium sp. ERR11	19.7	[16.5 - 23.3%]	0.72	0	22.7	[20.5 - 25.2%]	0.1925	0	19.2	[16.5 - 22.3%]	0.7739	0	1.3
Bradyrhizobium erythrophlei GAS242	Bradyrhizobium sp. Gha	19.2	[16 - 22.8%]	0.7344	0	22.2	[20 - 24.7%]	0.1971	0	18.8	[16.1 - 21.8%]	0.7868	0	0.94
Bradyrhizobium erythrophlei GAS242	Bradyrhizobium sp. Ghvi	19.1	[16 - 22.7%]	0.7365	0	22.3	[20 - 24.7%]	0.1969	0	18.7	[16 - 21.7%]	0.7884	0	1.1
Bradyrhizobium erythrophlei GAS242	Bradyrhizobium sp. OK095	20.4	[17.2 - 24.1%]	0.7	0	22.3	[20 - 24.7%]	0.1967	0	19.8	[17.1 - 22.8%]	0.759	0	1.96
Bradyrhizobium erythrophlei GAS242	Bradyrhizobium sp. R5	20.3	[17.1 - 23.9%]	0.7045	0	23.9	[21.6 - 26.3%]	0.183	0	19.8	[17.1 - 22.9%]	0.7586	0	1.72
Bradyrhizobium erythrophlei GAS242	Bradyrhizobium sp. Rc2d	19.4	[16.3 - 23%]	0.7272	0	22.7	[20.4 - 25.1%]	0.1931	0	19	[16.3 - 22%]	0.7799	0	0.9
Bradyrhizobium erythrophlei GAS242	Bradyrhizobium sp. Rc3b	19.9	[16.7 - 23.5%]	0.7149	0	22.8	[20.5 - 25.2%]	0.1921	0	19.4	[16.7 - 22.4%]	0.7697	0	1.74
Bradyrhizobium erythrophlei GAS242	Bradyrhizobium yuanmingense CCBAU 10071	19.6	[16.4 - 23.2%]	0.7223	0	22.6	[20.3 - 25%]	0.194	0	19.2	[16.5 - 22.2%]	0.7762	0	1.84
Bradyrhizobium erythrophlei GAS242	Bradyrhizobium yuanmingense CGMCC 1.3531	19.6	[16.4 - 23.2%]	0.7227	0	22.6	[20.3 - 25%]	0.1941	0	19.1	[16.4 - 22.2%]	0.7765	0	1.84
Bradyrhizobium erythrophlei GAS242	Mesorhizobium_ciceri_WSM1271_OUTGROUP	13	[10.3 - 16.3%]	0.9723	0	18.5	[16.3 - 20.9%]	0.2376	0	13.3	[11 - 16.1%]	0.9788	0	0.63
Bradyrhizobium erythrophlei GAS242	Bradyrhizobium_diazoefficiens_SEMIA_5080	20.2	[17 - 23.8%]	0.7065	0	23.1	[20.8 - 25.6%]	0.1894	0	19.7	[17 - 22.7%]	0.7621	0	2.05
Bradyrhizobium erythrophlei GAS242	Bradyrhizobium_diazoefficiens_USDA_110	20.2	[17 - 23.8%]	0.7058	0	23	[20.7 - 25.5%]	0.1901	0	19.7	[17 - 22.7%]	0.7618	0	2.13
Bradyrhizobium erythrophlei GAS242	Bradyrhizobium_elkanii_587	18.7	[15.5 - 22.2%]	0.7498	0	24.4	[22.1 - 26.9%]	0.1786	0.01	18.5	[15.8 - 21.5%]	0.7945	0	1.71
Bradyrhizobium erythrophlei GAS242	Bradyrhizobium_elkanii_BLY3-8	20.4	[17.3 - 24.1%]	0.6998	0	23.9	[21.6 - 26.4%]	0.1828	0	20	[17.2 - 23%]	0.7547	0	1.88
Bradyrhizobium erythrophlei GAS242	Bradyrhizobium_elkanii_BLY6-1	20.4	[17.3 - 24.1%]	0.6997	0	23.9	[21.6 - 26.4%]	0.1828	0	20	[17.2 - 23%]	0.7546	0	1.88
Bradyrhizobium erythrophlei GAS242	Bradyrhizobium_elkanii_CCBAU_05737	19.7	[16.6 - 23.3%]	0.7191	0	23.9	[21.6 - 26.4%]	0.1828	0	19.4	[16.7 - 22.4%]	0.7705	0	1.58
Bradyrhizobium erythrophlei GAS242	Bradyrhizobium_elkanii_CCBAU_43297	19.9	[16.8 - 23.5%]	0.7132	0	24.1	[21.7 - 26.5%]	0.1815	0.01	19.6	[16.9 - 22.6%]	0.7653	0	1.82
Bradyrhizobium erythrophlei GAS242	Bradyrhizobium_elkanii_UASWS1015	20.7	[17.5 - 24.3%]	0.694	0	23.6	[21.3 - 26%]	0.1854	0	20.1	[17.4 - 23.2%]	0.7507	0	2.71
Bradyrhizobium erythrophlei GAS242	Bradyrhizobium_elkanii_USDA_76	20.4	[17.2 - 24%]	0.7017	0	23.9	[21.6 - 26.4%]	0.1826	0	19.9	[17.2 - 23%]	0.7562	0	1.79
Bradyrhizobium erythrophlei GAS242	Bradyrhizobium_elkanii_USDA_94	20.3	[17.1 - 23.9%]	0.7037	0	23.9	[21.6 - 26.3%]	0.1831	0	19.9	[17.1 - 22.9%]	0.7579	0	1.82
Bradyrhizobium erythrophlei GAS242	Bradyrhizobium_elkanii_USDA_3254	20.6	[17.4 - 24.2%]	0.695	0	23.7	[21.4 - 26.2%]	0.1841	0	20.1	[17.4 - 23.2%]	0.7511	0	1.85
Bradyrhizobium erythrophlei GAS242	Bradyrhizobium_elkanii_USDA_3259	20.8	[17.6 - 24.4%]	0.6917	0	23.7	[21.4 - 26.2%]	0.1841	0	20.2	[17.5 - 23.3%]	0.7485	0	1.98
Bradyrhizobium erythrophlei GAS242	Bradyrhizobium_elkanii_WSM1741	21.2	[17.9 - 24.8%]	0.6815	0	24.1	[21.8 - 26.5%]	0.1814	0.01	20.6	[17.8 - 23.7%]	0.7392	0	0.17
Bradyrhizobium erythrophlei GAS242	Bradyrhizobium_elkanii_WSM2783	20.1	[16.9 - 23.7%]	0.7095	0	24.1	[21.8 - 26.6%]	0.1813	0.01	19.7	[17 - 22.7%]	0.7622	0	0.42
Bradyrhizobium erythrophlei GAS242	Bradyrhizobium_embrapense_SEMIA_6208	20.7	[17.5 - 24.3%]	0.6932	0	23.6	[21.3 - 26.1%]	0.1851	0	20.2	[17.4 - 23.2%]	0.75	0	2.05
Bradyrhizobium erythrophlei GAS242	Bradyrhizobium_icense_LMTR_13	20.9	[17.6 - 24.5%]	0.6893	0	24.1	[21.8 - 26.6%]	0.1812	0.01	20.3	[17.6 - 23.4%]	0.7456	0	0.1
Bradyrhizobium erythrophlei GAS242	Bradyrhizobium_japonicum_22	20	[16.8 - 23.6%]	0.7111	0	22.9	[20.6 - 25.3%]	0.1916	0	19.5	[16.8 - 22.6%]	0.7664	0	2.6
Bradyrhizobium erythrophlei GAS242	Bradyrhizobium_japonicum_CCBA_15517	19.3	[16.2 - 22.9%]	0.7306	0	23	[20.7 - 25.4%]	0.1905	0	18.9	[16.3 - 22%]	0.782	0	1.47
Bradyrhizobium erythrophlei GAS242	Bradyrhizobium_japonicum_CCBAU_15354	19.3	[16.2 - 22.9%]	0.7306	0	23.1	[20.8 - 25.5%]	0.1898	0	19	[16.3 - 22%]	0.7818	0	1.4
Bradyrhizobium erythrophlei GAS242	Bradyrhizobium_japonicum_CCBAU_15618	19.4	[16.3 - 23%]	0.7279	0	23	[20.7 - 25.4%]	0.1904	0	19	[16.3 - 22%]	0.7797	0	1.49
Bradyrhizobium erythrophlei GAS242	Bradyrhizobium_japonicum_CCBAU_25435	19.7	[16.5 - 23.3%]	0.7196	0	22.8	[20.5 - 25.3%]	0.1918	0	19.3	[16.6 - 22.3%]	0.7734	0	1.55
Bradyrhizobium erythrophlei GAS242	Bradyrhizobium_japonicum_CCBAU_83623	19.2	[16.1 - 22.8%]	0.7339	0	23	[20.7 - 25.5%]	0.1903	0	18.9	[16.2 - 21.9%]	0.7846	0	1.38
Bradyrhizobium erythrophlei GAS242	Bradyrhizobium_japonicum_E109	20.1	[16.9 - 23.7%]	0.7096	0	22.8	[20.5 - 25.2%]	0.1923	0	19.6	[16.8 - 22.6%]	0.7654	0	1.73
Bradyrhizobium erythrophlei GAS242	Bradyrhizobium_japonicum_FN1	20.1	[16.9 - 23.7%]	0.7099	0	22.8	[20.5 - 25.2%]	0.1923	0	19.5	[16.8 - 22.6%]	0.7657	0	1.76
Bradyrhizobium erythrophlei GAS242	Bradyrhizobium_japonicum_in8p8	18.9	[15.7 - 22.4%]	0.7436	0	22.4	[20.2 - 24.9%]	0.1953	0	18.5	[15.9 - 21.5%]	0.7936	0	1.86
Bradyrhizobium erythrophlei GAS242	Bradyrhizobium_japonicum_Is-1	20.2	[17 - 23.8%]	0.7056	0	23.1	[20.8 - 25.6%]	0.1894	0	19.7	[17 - 22.8%]	0.7614	0	2.06
Bradyrhizobium erythrophlei GAS242	Bradyrhizobium_japonicum_is5	18.9	[15.8 - 22.5%]	0.7431	0	22.4	[20.2 - 24.9%]	0.1953	0	18.5	[15.9 - 21.5%]	0.7933	0	1.86
Bradyrhizobium erythrophlei GAS242	Bradyrhizobium_japonicum_Is-34	19.7	[16.5 - 23.3%]	0.7196	0	22.8	[20.5 - 25.2%]	0.1924	0	19.3	[16.6 - 22.3%]	0.7735	0	1.12
Bradyrhizobium erythrophlei GAS242	Bradyrhizobium_japonicum_SEMIA_5079	20	[16.8 - 23.6%]	0.7123	0	22.8	[20.5 - 25.3%]	0.192	0	19.5	[16.8 - 22.5%]	0.7675	0	1.62
Bradyrhizobium erythrophlei GAS242	Bradyrhizobium_japonicum_USDA_4	20	[16.8 - 23.6%]	0.7111	0	22.7	[20.4 - 25.2%]	0.1928	0	19.5	[16.8 - 22.5%]	0.7668	0	1.75
Bradyrhizobium erythrophlei GAS242	Bradyrhizobium_japonicum_USDA_6	20.1	[16.9 - 23.7%]	0.7094	0	22.8	[20.5 - 25.2%]	0.1923	0	19.6	[16.8 - 22.6%]	0.7653	0	1.74
Bradyrhizobium erythrophlei GAS242	Bradyrhizobium_japonicum_USDA_38	20	[16.8 - 23.6%]	0.7126	0	22.7	[20.4 - 25.2%]	0.1928	0	19.5	[16.8 - 22.5%]	0.768	0	1.61
Bradyrhizobium erythrophlei GAS242	Bradyrhizobium_japonicum_USDA_122	20.2	[17 - 23.8%]	0.7063	0	23.1	[20.8 - 25.5%]	0.1895	0	19.7	[17 - 22.7%]	0.7619	0	2.07
Bradyrhizobium erythrophlei GAS242	Bradyrhizobium_japonicum_USDA_123	19.4	[16.3 - 23%]	0.7271	0	22.9	[20.6 - 25.3%]	0.1913	0	19	[16.3 - 22.1%]	0.7793	0	1.34
Bradyrhizobium erythrophlei GAS242	Bradyrhizobium_japonicum_USDA_124	20.3	[17.1 - 23.9%]	0.7046	0	22.8	[20.5 - 25.3%]	0.1918	0	19.7	[17 - 22.8%]	0.7613	0	2.12
Bradyrhizobium erythrophlei GAS242	Bradyrhizobium_japonicum_USDA_135	20.1	[16.9 - 23.7%]	0.7094	0	22.8	[20.5 - 25.3%]	0.192	0	19.6	[16.9 - 22.6%]	0.7652	0	2.03
Bradyrhizobium erythrophlei GAS242	Bradyrhizobium_jicamae_PAC68	21.1	[17.8 - 24.7%]	0.6841	0	24.3	[22 - 26.7%]	0.1798	0.01	20.5	[17.8 - 23.6%]	0.7409	0	0.47
Bradyrhizobium erythrophlei GAS242	Bradyrhizobium_liaoningense_CCBAU_05525	19.3	[16.2 - 22.9%]	0.7305	0	22.9	[20.6 - 25.4%]	0.1909	0	18.9	[16.3 - 22%]	0.782	0	1.87
Bradyrhizobium erythrophlei GAS242	Bradyrhizobium_liaoningense_CCBAU_83689	19.4	[16.2 - 23%]	0.7289	0	22.9	[20.6 - 25.4%]	0.1912	0	19	[16.3 - 22%]	0.7807	0	1.9
Bradyrhizobium erythrophlei GAS242	Bradyrhizobium_liaoningense_CCNWSX0360	19.8	[16.6 - 23.4%]	0.7172	0	22.7	[20.4 - 25.2%]	0.1928	0	19.3	[16.6 - 22.4%]	0.7717	0	1.78
Bradyrhizobium erythrophlei GAS242	Rhizobium_lupini_HPC_L_OUTGROUP	12.7	[10 - 15.9%]	0.99	0	18	[15.8 - 20.3%]	0.2445	0	13.1	[10.7 - 15.8%]	0.9925	0	2.71
Bradyrhizobium erythrophlei GAS242	Bradyrhizobium_manausense_BR3351	19.1	[15.9 - 22.6%]	0.7381	0	22.6	[20.4 - 25.1%]	0.1935	0	18.7	[16 - 21.7%]	0.7888	0	0.94
Bradyrhizobium erythrophlei GAS242	Bradyrhizobium_neotropicale_BR_10247	20.4	[17.2 - 24%]	0.7007	0	23.1	[20.8 - 25.6%]	0.1894	0	19.9	[17.1 - 22.9%]	0.7574	0	1.67
Bradyrhizobium erythrophlei GAS242	Bradyrhizobium_oligotrophicum_S58	18.8	[15.6 - 22.3%]	0.7464	0	22.1	[19.9 - 24.6%]	0.1981	0	18.4	[15.8 - 21.4%]	0.7967	0	3.2
Bradyrhizobium erythrophlei GAS242	Bradyrhizobium_pachyrhizi_BR3262	20.8	[17.6 - 24.4%]	0.6903	0	23.8	[21.5 - 26.3%]	0.1833	0	20.3	[17.5 - 23.3%]	0.7471	0	1.83
Bradyrhizobium erythrophlei GAS242	Bradyrhizobium_pachyrhizi_PAC_48	20.7	[17.4 - 24.3%]	0.6944	0	23.7	[21.4 - 26.1%]	0.1847	0	20.1	[17.4 - 23.2%]	0.7508	0	1.83
Bradyrhizobium erythrophlei GAS242	Bradyrhizobium_paxllaeri_LMTR_21	21.4	[18.2 - 25.1%]	0.6749	0	24.2	[21.9 - 26.7%]	0.1804	0.01	20.8	[18.1 - 23.9%]	0.7335	0	0.56
Bradyrhizobium erythrophlei GAS242	Bradyrhizobium_retamae_Ro19	20.8	[17.6 - 24.4%]	0.6909	0	24.1	[21.8 - 26.6%]	0.1808	0.01	20.3	[17.5 - 23.3%]	0.7468	0	0.06
Bradyrhizobium erythrophlei GAS242	Bradyrhizobium_sp_17-4	18.5	[15.4 - 22.1%]	0.7544	0	24.8	[22.5 - 27.3%]	0.1753	0.01	18.4	[15.7 - 21.4%]	0.7975	0	1.95
Bradyrhizobium erythrophlei GAS242	Bradyrhizobium_sp_Ai1a-2	20.2	[17 - 23.8%]	0.7063	0	24	[21.6 - 26.4%]	0.1823	0	19.8	[17.1 - 22.8%]	0.7598	0	0.65
Bradyrhizobium erythrophlei GAS242	Bradyrhizobium_sp_ARR65	19.1	[15.9 - 22.7%]	0.7378	0	22.8	[20.5 - 25.3%]	0.192	0	18.7	[16 - 21.7%]	0.7881	0	0.08
Bradyrhizobium erythrophlei GAS242	Bradyrhizobium_sp_AT1	20.3	[17.1 - 23.9%]	0.7037	0	22.8	[20.5 - 25.2%]	0.1923	0	19.7	[17 - 22.8%]	0.7607	0	2.63
Bradyrhizobium erythrophlei GAS242	Bradyrhizobium_sp_BF49	20	[16.8 - 23.6%]	0.712	0	22.6	[20.3 - 25%]	0.194	0	19.5	[16.8 - 22.5%]	0.7679	0	1.84
Bradyrhizobium erythrophlei GAS242	Bradyrhizobium_sp_BR_10245	20	[16.8 - 23.6%]	0.7109	0	23.1	[20.9 - 25.6%]	0.1891	0	19.6	[16.8 - 22.6%]	0.7656	0	1.29
Bradyrhizobium erythrophlei GAS242	Bradyrhizobium_sp_BR_10303	20.1	[16.9 - 23.7%]	0.7094	0	23.6	[21.3 - 26.1%]	0.1851	0	19.6	[16.9 - 22.7%]	0.7632	0	1.32
Bradyrhizobium erythrophlei GAS242	Bradyrhizobium_sp_CCBAU_15544	19.6	[16.5 - 23.2%]	0.7219	0	22.9	[20.6 - 25.3%]	0.1915	0	19.2	[16.5 - 22.2%]	0.7751	0	1.8
Bradyrhizobium erythrophlei GAS242	Bradyrhizobium_sp_CCBAU_15615	19.7	[16.6 - 23.3%]	0.7193	0	22.8	[20.5 - 25.3%]	0.192	0	19.3	[16.6 - 22.3%]	0.7732	0	1.74
Bradyrhizobium erythrophlei GAS242	Bradyrhizobium_sp_CCBAU_15635	19.9	[16.7 - 23.5%]	0.7138	0	22.9	[20.6 - 25.3%]	0.1915	0	19.4	[16.7 - 22.5%]	0.7686	0	1.88
Bradyrhizobium erythrophlei GAS242	Bradyrhizobium_sp_CCBAU_41267	19.8	[16.6 - 23.4%]	0.7173	0	23.2	[20.9 - 25.6%]	0.189	0	19.4	[16.7 - 22.4%]	0.7707	0	2.07
Bradyrhizobium erythrophlei GAS242	Bradyrhizobium_sp_CCBAU_43298	19.6	[16.4 - 23.2%]	0.7239	0	22.9	[20.6 - 25.4%]	0.1909	0	19.1	[16.4 - 22.2%]	0.7766	0	1.95
Bradyrhizobium erythrophlei GAS242	Bradyrhizobium_sp_CCGE-LA001	19.6	[16.5 - 23.2%]	0.7217	0	22.7	[20.4 - 25.1%]	0.1933	0	19.2	[16.5 - 22.2%]	0.7755	0	1.64
Bradyrhizobium erythrophlei GAS242	Bradyrhizobium_sp_CCH4-A6	15.1	[12.2 - 18.5%]	0.877	0	21.5	[19.3 - 24%]	0.2037	0	15.2	[12.7 - 18.1%]	0.902	0	1.03
Bradyrhizobium erythrophlei GAS242	Bradyrhizobium_sp_CCH5-F6	19.4	[16.3 - 23%]	0.7272	0	22.8	[20.6 - 25.3%]	0.1918	0	19	[16.3 - 22.1%]	0.7795	0	2.19
Bradyrhizobium erythrophlei GAS242	Bradyrhizobium_sp_CCH10-C7	15.2	[12.3 - 18.6%]	0.8709	0	21.4	[19.1 - 23.8%]	0.2056	0	15.3	[12.8 - 18.2%]	0.8975	0	1.21
Bradyrhizobium erythrophlei GAS242	Bradyrhizobium_sp_Cp5_3	20	[16.9 - 23.7%]	0.7104	0	23.1	[20.8 - 25.5%]	0.1896	0	19.6	[16.8 - 22.6%]	0.7654	0	1.48
Bradyrhizobium erythrophlei GAS242	Bradyrhizobium_sp_DFCI-1	21.2	[18 - 24.8%]	0.6802	0	23.6	[21.3 - 26.1%]	0.1848	0	20.6	[17.8 - 23.7%]	0.7393	0	2.51
Bradyrhizobium erythrophlei GAS242	Bradyrhizobium_sp_DOA1	19.5	[16.4 - 23.1%]	0.7251	0	22.7	[20.4 - 25.2%]	0.1929	0	19.1	[16.4 - 22.1%]	0.7781	0	1.88
Bradyrhizobium erythrophlei GAS242	Bradyrhizobium_sp_DOA9	20.5	[17.3 - 24.1%]	0.6994	0	22.7	[20.5 - 25.2%]	0.1927	0	19.9	[17.1 - 22.9%]	0.7573	0	2.56
Bradyrhizobium erythrophlei GAS242	Bradyrhizobium_sp_Ec3_3	19.4	[16.2 - 23%]	0.729	0	22.9	[20.6 - 25.3%]	0.1916	0	19	[16.3 - 22%]	0.7809	0	0.71
Bradyrhizobium erythrophlei GAS242	Bradyrhizobium_sp_G22	20.4	[17.2 - 24.1%]	0.6999	0	22.8	[20.5 - 25.3%]	0.192	0	19.9	[17.1 - 22.9%]	0.7575	0	1.8
Bradyrhizobium erythrophlei GAS242	Bradyrhizobium_sp_Leaf396	18.7	[15.6 - 22.3%]	0.7492	0	22.5	[20.2 - 24.9%]	0.1951	0	18.4	[15.7 - 21.4%]	0.7982	0	1.86
Bradyrhizobium erythrophlei GAS242	Bradyrhizobium_sp_LMTR_3	21.5	[18.2 - 25.1%]	0.6745	0	24.3	[22 - 26.7%]	0.1798	0.01	20.9	[18.1 - 23.9%]	0.733	0	0.34
Bradyrhizobium erythrophlei GAS242	Bradyrhizobium_sp_LTSP849	20.6	[17.4 - 24.2%]	0.6952	0	22.7	[20.5 - 25.2%]	0.1926	0	20	[17.3 - 23.1%]	0.7539	0	1.31
Bradyrhizobium erythrophlei GAS242	Bradyrhizobium_sp_LTSP857	20.9	[17.7 - 24.5%]	0.6888	0	22.6	[20.3 - 25.1%]	0.1936	0	20.2	[17.5 - 23.2%]	0.7491	0	1.36
Bradyrhizobium erythrophlei GAS242	Bradyrhizobium_sp_LTSP885	22.2	[18.9 - 25.8%]	0.6566	0	23.7	[21.4 - 26.2%]	0.1842	0	21.4	[18.6 - 24.5%]	0.7199	0	1.46
Bradyrhizobium erythrophlei GAS242	Bradyrhizobium_sp_LTSPM299	21.9	[18.7 - 25.6%]	0.6632	0	23.8	[21.5 - 26.3%]	0.1832	0	21.2	[18.4 - 24.3%]	0.7249	0	0.89
Bradyrhizobium erythrophlei GAS242	Bradyrhizobium_sp_OHSU_III	20.8	[17.6 - 24.4%]	0.6913	0	23.6	[21.3 - 26.1%]	0.1851	0	20.2	[17.5 - 23.3%]	0.7485	0	2.78
Bradyrhizobium erythrophlei GAS242	Bradyrhizobium_sp_ORS_278	18.6	[15.4 - 22.1%]	0.7527	0	22.4	[20.1 - 24.8%]	0.196	0	18.3	[15.6 - 21.3%]	0.8012	0	3.58
Bradyrhizobium erythrophlei GAS242	Bradyrhizobium_sp_ORS_285	18.6	[15.5 - 22.2%]	0.7518	0	22.3	[20 - 24.7%]	0.1966	0	18.3	[15.6 - 21.3%]	0.8006	0	3.3
Bradyrhizobium erythrophlei GAS242	Bradyrhizobium_sp_ORS_375	18.4	[15.3 - 22%]	0.7574	0	22.5	[20.2 - 25%]	0.1946	0	18.1	[15.5 - 21.1%]	0.8046	0	3.57
Bradyrhizobium erythrophlei GAS242	Bradyrhizobium_sp_S23321	21	[17.8 - 24.6%]	0.6858	0	22.5	[20.3 - 25%]	0.1945	0	20.3	[17.5 - 23.3%]	0.7469	0	2.37
Bradyrhizobium erythrophlei GAS242	Bradyrhizobium_sp_STM_3809	18.5	[15.4 - 22.1%]	0.755	0	22.9	[20.6 - 25.3%]	0.1916	0	18.2	[15.6 - 21.2%]	0.8019	0	4.26
Bradyrhizobium erythrophlei GAS242	Bradyrhizobium_sp_STM_3843	18.2	[15.1 - 21.8%]	0.7627	0	22.5	[20.3 - 25%]	0.1945	0	18	[15.4 - 21%]	0.8088	0	1.67
Bradyrhizobium erythrophlei GAS242	Bradyrhizobium_sp_th_b2	20.4	[17.2 - 24%]	0.7013	0	24	[21.7 - 26.4%]	0.1821	0	19.9	[17.2 - 23%]	0.7557	0	1.34
Bradyrhizobium erythrophlei GAS242	Bradyrhizobium_sp_Tv2a-2	19.9	[16.8 - 23.5%]	0.7134	0	22.6	[20.4 - 25.1%]	0.1936	0	19.4	[16.7 - 22.5%]	0.7689	0	0.27
Bradyrhizobium erythrophlei GAS242	Bradyrhizobium_sp_URHA0002	22.6	[19.3 - 26.2%]	0.6479	0	24.1	[21.8 - 26.6%]	0.181	0.01	21.8	[19 - 24.9%]	0.7116	0	0.27
Bradyrhizobium erythrophlei GAS242	Bradyrhizobium_sp_URHA0013	20.5	[17.3 - 24.1%]	0.6981	0	22.4	[20.2 - 24.9%]	0.1953	0	19.9	[17.2 - 22.9%]	0.757	0	1.84
Bradyrhizobium erythrophlei GAS242	Bradyrhizobium_sp_URHD0069	23.2	[19.9 - 26.9%]	0.6343	0	26.4	[24 - 28.8%]	0.1644	0.02	22.6	[19.7 - 25.7%]	0.6944	0	1.25
Bradyrhizobium erythrophlei GAS242	Bradyrhizobium_sp_USDA_3384	20	[16.8 - 23.6%]	0.7114	0	22.8	[20.6 - 25.3%]	0.1917	0	19.5	[16.8 - 22.5%]	0.7667	0	1.63
Bradyrhizobium erythrophlei GAS242	Bradyrhizobium_sp_WSM471	20.2	[17 - 23.8%]	0.7073	0	22.6	[20.3 - 25%]	0.1943	0	19.6	[16.9 - 22.6%]	0.7641	0	1.48
Bradyrhizobium erythrophlei GAS242	Bradyrhizobium_sp_WSM1253	19.8	[16.6 - 23.4%]	0.7173	0	22.6	[20.4 - 25.1%]	0.1934	0	19.3	[16.6 - 22.3%]	0.7719	0	1.22
Bradyrhizobium erythrophlei GAS242	Bradyrhizobium_sp_WSM1417	19.9	[16.7 - 23.5%]	0.7151	0	22.5	[20.3 - 25%]	0.1945	0	19.4	[16.7 - 22.4%]	0.7705	0	1.24
Bradyrhizobium erythrophlei GAS242	Bradyrhizobium_sp_WSM1743	19.5	[16.4 - 23.1%]	0.7243	0	22.8	[20.5 - 25.3%]	0.192	0	19.1	[16.4 - 22.1%]	0.7772	0	1.45
Bradyrhizobium erythrophlei GAS242	Bradyrhizobium_sp_WSM2254	20.4	[17.2 - 24%]	0.7014	0	23.1	[20.8 - 25.5%]	0.1897	0	19.8	[17.1 - 22.9%]	0.7581	0	1.96
Bradyrhizobium erythrophlei GAS242	Bradyrhizobium_sp_WSM2793	19.7	[16.5 - 23.3%]	0.7207	0	22.8	[20.5 - 25.3%]	0.1919	0	19.2	[16.5 - 22.3%]	0.7743	0	1.6
Bradyrhizobium erythrophlei GAS242	Bradyrhizobium_sp_WSM3983	19.7	[16.6 - 23.3%]	0.719	0	22.6	[20.3 - 25%]	0.194	0	19.3	[16.6 - 22.3%]	0.7735	0	1.04
Bradyrhizobium erythrophlei GAS242	Bradyrhizobium_sp_WSM4349	19.8	[16.7 - 23.4%]	0.7163	0	22.5	[20.2 - 24.9%]	0.1951	0	19.3	[16.6 - 22.4%]	0.7716	0	1.21
Bradyrhizobium erythrophlei GAS242	Bradyrhizobium_sp_YR681	20.4	[17.2 - 24%]	0.7007	0	22.8	[20.5 - 25.2%]	0.1923	0	19.8	[17.1 - 22.9%]	0.7582	0	2.79
Bradyrhizobium erythrophlei GAS242	Bradyrhizobium_stylosanthis_BR_446	20.1	[17 - 23.8%]	0.7076	0	23	[20.7 - 25.4%]	0.1906	0	19.6	[16.9 - 22.7%]	0.7633	0	2.63
Bradyrhizobium erythrophlei GAS242	Bradyrhizobium_tropiciagri_SEMIA_6148	20	[16.8 - 23.6%]	0.7123	0	23.9	[21.6 - 26.4%]	0.1829	0	19.6	[16.9 - 22.6%]	0.7649	0	1.56
Bradyrhizobium erythrophlei GAS242	Bradyrhizobium_valentinum_LmjM3	21.1	[17.9 - 24.7%]	0.6837	0	24.8	[22.5 - 27.3%]	0.1756	0.01	20.6	[17.8 - 23.7%]	0.7393	0	0.01
Bradyrhizobium erythrophlei GAS242	Bradyrhizobium_valentinum_LmjM6	21.1	[17.9 - 24.8%]	0.6825	0	24.8	[22.4 - 27.2%]	0.176	0.01	20.6	[17.9 - 23.7%]	0.7383	0	0.05
Bradyrhizobium erythrophlei GAS242	Bradyrhizobium_viridifuturi_SEMIA_690	20.4	[17.2 - 24%]	0.7007	0	23.6	[21.3 - 26.1%]	0.185	0	19.9	[17.2 - 23%]	0.756	0	2.1
Bradyrhizobium erythrophlei GAS242	Bradyrhizobium_yuanmingense_BR3267	19.8	[16.6 - 23.4%]	0.7174	0	22.6	[20.3 - 25.1%]	0.1937	0	19.3	[16.6 - 22.3%]	0.7721	0	1.94
Bradyrhizobium erythrophlei GAS242	Bradyrhizobium_yuanmingense_CCBAU_05623	19.2	[16.1 - 22.8%]	0.7339	0	22.7	[20.4 - 25.1%]	0.193	0	18.8	[16.1 - 21.8%]	0.7852	0	1.86
Bradyrhizobium erythrophlei GAS242	Bradyrhizobium_yuanmingense_CCBAU_25021	19.5	[16.3 - 23%]	0.7268	0	22.7	[20.4 - 25.1%]	0.1931	0	19	[16.3 - 22.1%]	0.7795	0	1.88
Bradyrhizobium erythrophlei GAS242	Bradyrhizobium_yuanmingense_CCBAU_35157	19.4	[16.3 - 23%]	0.7269	0	22.6	[20.4 - 25.1%]	0.1934	0	19	[16.3 - 22%]	0.7797	0	2.01
Bradyrhizobium erythrophlei GAS401	Bradyrhizobium erythrophlei MT12	18.4	[15.3 - 22%]	0.7571	0	23	[20.7 - 25.5%]	0.1901	0	18.2	[15.5 - 21.2%]	0.8033	0	2.66
Bradyrhizobium erythrophlei GAS401	Bradyrhizobium huanghuaihaiense CGMCC 1.10948	17.4	[14.4 - 21%]	0.7886	0	22.2	[19.9 - 24.6%]	0.1979	0	17.3	[14.7 - 20.3%]	0.8305	0	2.78
Bradyrhizobium erythrophlei GAS401	Bradyrhizobium lablabi GAS522	19.2	[16.1 - 22.8%]	0.7335	0	23.3	[21 - 25.8%]	0.1876	0	18.9	[16.2 - 21.9%]	0.7835	0	1.18
Bradyrhizobium erythrophlei GAS401	Bradyrhizobium ottawaense GAS524	19.2	[16 - 22.8%]	0.7347	0	23.3	[21 - 25.8%]	0.1876	0	18.9	[16.2 - 21.9%]	0.7845	0	1.15
Bradyrhizobium erythrophlei GAS401	Bradyrhizobium sp. CF659	17.9	[14.8 - 21.4%]	0.774	0	22.5	[20.2 - 25%]	0.1946	0	17.7	[15.1 - 20.7%]	0.818	0	3.36
Bradyrhizobium erythrophlei GAS401	Bradyrhizobium sp. ERR11	17.2	[14.1 - 20.7%]	0.797	0	22	[19.7 - 24.4%]	0.1993	0	17.1	[14.5 - 20%]	0.8375	0	2.07
Bradyrhizobium erythrophlei GAS401	Bradyrhizobium sp. Gha	17	[14 - 20.5%]	0.8028	0	21.9	[19.6 - 24.3%]	0.2007	0	16.9	[14.3 - 19.9%]	0.8424	0	1.71
Bradyrhizobium erythrophlei GAS401	Bradyrhizobium sp. Ghvi	17.1	[14 - 20.6%]	0.8013	0	22.2	[19.9 - 24.6%]	0.1979	0	17	[14.4 - 19.9%]	0.8406	0	1.87
Bradyrhizobium erythrophlei GAS401	Bradyrhizobium sp. OK095	17.5	[14.5 - 21.1%]	0.7857	0	21.8	[19.6 - 24.3%]	0.2009	0	17.3	[14.7 - 20.3%]	0.8288	0	2.73
Bradyrhizobium erythrophlei GAS401	Bradyrhizobium sp. R5	17.9	[14.8 - 21.4%]	0.7746	0	22.9	[20.7 - 25.4%]	0.1908	0	17.7	[15.1 - 20.7%]	0.8176	0	2.49
Bradyrhizobium erythrophlei GAS401	Bradyrhizobium sp. Rc2d	16.9	[13.8 - 20.4%]	0.8081	0	22.2	[19.9 - 24.6%]	0.1977	0	16.8	[14.2 - 19.7%]	0.846	0	1.67
Bradyrhizobium erythrophlei GAS401	Bradyrhizobium sp. Rc3b	17.5	[14.4 - 21%]	0.7866	0	22.1	[19.9 - 24.6%]	0.1982	0	17.3	[14.7 - 20.3%]	0.8289	0	2.52
Bradyrhizobium erythrophlei GAS401	Bradyrhizobium yuanmingense CCBAU 10071	17.2	[14.1 - 20.7%]	0.7978	0	22.2	[20 - 24.7%]	0.1971	0	17.1	[14.5 - 20%]	0.8377	0	2.61
Bradyrhizobium erythrophlei GAS401	Bradyrhizobium yuanmingense CGMCC 1.3531	17.1	[14.1 - 20.7%]	0.7982	0	22.2	[20 - 24.7%]	0.197	0	17	[14.4 - 20%]	0.838	0	2.62
Bradyrhizobium erythrophlei GAS401	Mesorhizobium_ciceri_WSM1271_OUTGROUP	12.9	[10.2 - 16.2%]	0.9766	0	18.5	[16.4 - 20.9%]	0.237	0	13.3	[10.9 - 16%]	0.9821	0	1.4
Bradyrhizobium erythrophlei GAS401	Bradyrhizobium_diazoefficiens_SEMIA_5080	17.6	[14.5 - 21.1%]	0.7834	0	22.3	[20.1 - 24.8%]	0.1963	0	17.4	[14.8 - 20.4%]	0.8259	0	2.82
Bradyrhizobium erythrophlei GAS401	Bradyrhizobium_diazoefficiens_USDA_110	17.6	[14.6 - 21.2%]	0.7815	0	22.2	[20 - 24.7%]	0.1971	0	17.5	[14.9 - 20.5%]	0.8245	0	2.9
Bradyrhizobium erythrophlei GAS401	Bradyrhizobium_elkanii_587	16.7	[13.7 - 20.2%]	0.8129	0	23.6	[21.3 - 26.1%]	0.1853	0	16.8	[14.2 - 19.7%]	0.8475	0	2.49
Bradyrhizobium erythrophlei GAS401	Bradyrhizobium_elkanii_BLY3-8	17.9	[14.9 - 21.5%]	0.7718	0	22.9	[20.6 - 25.3%]	0.1912	0	17.8	[15.1 - 20.8%]	0.8154	0	2.65
Bradyrhizobium erythrophlei GAS401	Bradyrhizobium_elkanii_BLY6-1	17.9	[14.9 - 21.5%]	0.7717	0	22.9	[20.6 - 25.3%]	0.1913	0	17.8	[15.1 - 20.8%]	0.8153	0	2.65
Bradyrhizobium erythrophlei GAS401	Bradyrhizobium_elkanii_CCBAU_05737	17.4	[14.4 - 21%]	0.7882	0	23	[20.8 - 25.5%]	0.19	0	17.4	[14.7 - 20.3%]	0.8285	0	2.35
Bradyrhizobium erythrophlei GAS401	Bradyrhizobium_elkanii_CCBAU_43297	17.5	[14.5 - 21.1%]	0.7853	0	23.2	[20.9 - 25.7%]	0.1886	0	17.4	[14.8 - 20.4%]	0.8258	0	2.59
Bradyrhizobium erythrophlei GAS401	Bradyrhizobium_elkanii_UASWS1015	18.3	[15.2 - 21.9%]	0.7606	0	22.6	[20.3 - 25.1%]	0.1938	0	18.1	[15.4 - 21.1%]	0.807	0	3.48
Bradyrhizobium erythrophlei GAS401	Bradyrhizobium_elkanii_USDA_76	17.8	[14.7 - 21.3%]	0.7771	0	23	[20.7 - 25.4%]	0.1906	0	17.6	[15 - 20.6%]	0.8196	0	2.56
Bradyrhizobium erythrophlei GAS401	Bradyrhizobium_elkanii_USDA_94	17.7	[14.7 - 21.3%]	0.779	0	23	[20.7 - 25.4%]	0.1906	0	17.6	[15 - 20.6%]	0.8211	0	2.59
Bradyrhizobium erythrophlei GAS401	Bradyrhizobium_elkanii_USDA_3254	17.8	[14.8 - 21.4%]	0.7749	0	22.9	[20.6 - 25.4%]	0.191	0	17.7	[15.1 - 20.7%]	0.8179	0	2.62
Bradyrhizobium erythrophlei GAS401	Bradyrhizobium_elkanii_USDA_3259	18	[14.9 - 21.5%]	0.7716	0	22.9	[20.6 - 25.4%]	0.191	0	17.8	[15.1 - 20.8%]	0.8152	0	2.75
Bradyrhizobium erythrophlei GAS401	Bradyrhizobium_elkanii_WSM1741	17.8	[14.7 - 21.3%]	0.7775	0	22.4	[20.1 - 24.9%]	0.1955	0	17.6	[15 - 20.6%]	0.821	0	0.94
Bradyrhizobium erythrophlei GAS401	Bradyrhizobium_elkanii_WSM2783	17.2	[14.2 - 20.8%]	0.7947	0	22.5	[20.3 - 25%]	0.1945	0	17.2	[14.5 - 20.1%]	0.8346	0	1.19
Bradyrhizobium erythrophlei GAS401	Bradyrhizobium_embrapense_SEMIA_6208	18.1	[15 - 21.7%]	0.7662	0	22.6	[20.3 - 25.1%]	0.1938	0	17.9	[15.3 - 20.9%]	0.8115	0	2.82
Bradyrhizobium erythrophlei GAS401	Bradyrhizobium_icense_LMTR_13	17.5	[14.5 - 21.1%]	0.7847	0	22.7	[20.4 - 25.1%]	0.1932	0	17.4	[14.8 - 20.4%]	0.8263	0	0.87
Bradyrhizobium erythrophlei GAS401	Bradyrhizobium_japonicum_22	17.4	[14.3 - 20.9%]	0.7906	0	22.3	[20 - 24.7%]	0.1967	0	17.2	[14.6 - 20.2%]	0.8318	0	3.37
Bradyrhizobium erythrophlei GAS401	Bradyrhizobium_japonicum_CCBA_15517	16.7	[13.7 - 20.2%]	0.8132	0	22.4	[20.2 - 24.9%]	0.1953	0	16.7	[14.1 - 19.6%]	0.8497	0	2.24
Bradyrhizobium erythrophlei GAS401	Bradyrhizobium_japonicum_CCBAU_15354	16.7	[13.7 - 20.2%]	0.8124	0	22.5	[20.2 - 24.9%]	0.195	0	16.7	[14.1 - 19.7%]	0.849	0	2.17
Bradyrhizobium erythrophlei GAS401	Bradyrhizobium_japonicum_CCBAU_15618	16.8	[13.8 - 20.4%]	0.8084	0	22.4	[20.1 - 24.8%]	0.196	0	16.8	[14.2 - 19.8%]	0.8459	0	2.26
Bradyrhizobium erythrophlei GAS401	Bradyrhizobium_japonicum_CCBAU_25435	17	[14 - 20.5%]	0.8032	0	22.3	[20 - 24.8%]	0.1964	0	16.9	[14.3 - 19.9%]	0.8418	0	2.32
Bradyrhizobium erythrophlei GAS401	Bradyrhizobium_japonicum_CCBAU_83623	16.7	[13.7 - 20.2%]	0.8144	0	22.5	[20.2 - 24.9%]	0.1951	0	16.7	[14.1 - 19.6%]	0.8506	0	2.15
Bradyrhizobium erythrophlei GAS401	Bradyrhizobium_japonicum_E109	17.3	[14.2 - 20.8%]	0.7941	0	22.2	[19.9 - 24.6%]	0.1979	0	17.1	[14.5 - 20.1%]	0.8348	0	2.5
Bradyrhizobium erythrophlei GAS401	Bradyrhizobium_japonicum_FN1	17.2	[14.2 - 20.8%]	0.7946	0	22.1	[19.9 - 24.6%]	0.198	0	17.1	[14.5 - 20.1%]	0.8353	0	2.53
Bradyrhizobium erythrophlei GAS401	Bradyrhizobium_japonicum_in8p8	16.7	[13.7 - 20.2%]	0.8125	0	22.1	[19.8 - 24.5%]	0.1984	0	16.7	[14.1 - 19.6%]	0.8497	0	2.63
Bradyrhizobium erythrophlei GAS401	Bradyrhizobium_japonicum_Is-1	17.6	[14.6 - 21.2%]	0.7821	0	22.3	[20 - 24.8%]	0.1964	0	17.5	[14.8 - 20.4%]	0.8249	0	2.84
Bradyrhizobium erythrophlei GAS401	Bradyrhizobium_japonicum_is5	16.7	[13.7 - 20.3%]	0.8121	0	22.1	[19.8 - 24.5%]	0.1984	0	16.7	[14.1 - 19.6%]	0.8494	0	2.63
Bradyrhizobium erythrophlei GAS401	Bradyrhizobium_japonicum_Is-34	16.9	[13.9 - 20.5%]	0.8052	0	22.2	[19.9 - 24.7%]	0.1973	0	16.9	[14.3 - 19.8%]	0.8436	0	1.89
Bradyrhizobium erythrophlei GAS401	Bradyrhizobium_japonicum_SEMIA_5079	17.2	[14.2 - 20.8%]	0.7953	0	22.2	[20 - 24.7%]	0.1971	0	17.1	[14.5 - 20.1%]	0.8356	0	2.39
Bradyrhizobium erythrophlei GAS401	Bradyrhizobium_japonicum_USDA_4	17.4	[14.3 - 20.9%]	0.7906	0	22.2	[19.9 - 24.6%]	0.1975	0	17.2	[14.6 - 20.2%]	0.832	0	2.52
Bradyrhizobium erythrophlei GAS401	Bradyrhizobium_japonicum_USDA_6	17.3	[14.2 - 20.8%]	0.7942	0	22.2	[19.9 - 24.6%]	0.1979	0	17.1	[14.5 - 20.1%]	0.8349	0	2.51
Bradyrhizobium erythrophlei GAS401	Bradyrhizobium_japonicum_USDA_38	17.1	[14.1 - 20.6%]	0.7997	0	22.2	[20 - 24.7%]	0.1971	0	17	[14.4 - 20%]	0.8392	0	2.38
Bradyrhizobium erythrophlei GAS401	Bradyrhizobium_japonicum_USDA_122	17.6	[14.5 - 21.1%]	0.7828	0	22.3	[20.1 - 24.8%]	0.1963	0	17.4	[14.8 - 20.4%]	0.8254	0	2.84
Bradyrhizobium erythrophlei GAS401	Bradyrhizobium_japonicum_USDA_123	16.9	[13.9 - 20.4%]	0.8069	0	22.2	[19.9 - 24.6%]	0.1976	0	16.8	[14.2 - 19.8%]	0.8451	0	2.12
Bradyrhizobium erythrophlei GAS401	Bradyrhizobium_japonicum_USDA_124	17.5	[14.5 - 21%]	0.7861	0	22.2	[19.9 - 24.6%]	0.1977	0	17.4	[14.7 - 20.3%]	0.8284	0	2.89
Bradyrhizobium erythrophlei GAS401	Bradyrhizobium_japonicum_USDA_135	17.3	[14.3 - 20.8%]	0.7931	0	22.4	[20.1 - 24.8%]	0.1958	0	17.2	[14.6 - 20.2%]	0.8336	0	2.8
Bradyrhizobium erythrophlei GAS401	Bradyrhizobium_jicamae_PAC68	17.9	[14.8 - 21.5%]	0.7727	0	22.7	[20.5 - 25.2%]	0.1925	0	17.7	[15.1 - 20.7%]	0.8164	0	1.24
Bradyrhizobium erythrophlei GAS401	Bradyrhizobium_liaoningense_CCBAU_05525	16.9	[13.9 - 20.4%]	0.8078	0	22.6	[20.3 - 25%]	0.1939	0	16.8	[14.2 - 19.8%]	0.845	0	2.64
Bradyrhizobium erythrophlei GAS401	Bradyrhizobium_liaoningense_CCBAU_83689	16.9	[13.9 - 20.4%]	0.8061	0	22.6	[20.3 - 25%]	0.1941	0	16.9	[14.3 - 19.8%]	0.8437	0	2.68
Bradyrhizobium erythrophlei GAS401	Bradyrhizobium_liaoningense_CCNWSX0360	17.1	[14.1 - 20.6%]	0.8004	0	22.3	[20 - 24.8%]	0.1965	0	17	[14.4 - 20%]	0.8396	0	2.55
Bradyrhizobium erythrophlei GAS401	Rhizobium_lupini_HPC_L_OUTGROUP	12.7	[10 - 15.9%]	0.9901	0	17.5	[15.4 - 19.9%]	0.2507	0	13.1	[10.7 - 15.8%]	0.9926	0	1.94
Bradyrhizobium erythrophlei GAS401	Bradyrhizobium_manausense_BR3351	16.8	[13.8 - 20.3%]	0.8091	0	22.2	[19.9 - 24.6%]	0.1977	0	16.8	[14.2 - 19.7%]	0.8468	0	1.71
Bradyrhizobium erythrophlei GAS401	Bradyrhizobium_neotropicale_BR_10247	17.5	[14.4 - 21%]	0.7864	0	22.5	[20.2 - 24.9%]	0.1949	0	17.4	[14.7 - 20.3%]	0.828	0	2.44
Bradyrhizobium erythrophlei GAS401	Bradyrhizobium_oligotrophicum_S58	16.6	[13.6 - 20.1%]	0.8182	0	22	[19.8 - 24.5%]	0.1992	0	16.5	[14 - 19.5%]	0.8544	0	3.97
Bradyrhizobium erythrophlei GAS401	Bradyrhizobium_pachyrhizi_BR3262	18	[14.9 - 21.5%]	0.7705	0	22.9	[20.6 - 25.4%]	0.1912	0	17.8	[15.2 - 20.8%]	0.8144	0	2.6
Bradyrhizobium erythrophlei GAS401	Bradyrhizobium_pachyrhizi_PAC_48	17.9	[14.8 - 21.5%]	0.7727	0	22.8	[20.5 - 25.3%]	0.192	0	17.7	[15.1 - 20.7%]	0.8163	0	2.6
Bradyrhizobium erythrophlei GAS401	Bradyrhizobium_paxllaeri_LMTR_21	17.8	[14.7 - 21.4%]	0.7757	0	22.8	[20.5 - 25.3%]	0.192	0	17.7	[15 - 20.6%]	0.8188	0	1.33
Bradyrhizobium erythrophlei GAS401	Bradyrhizobium_retamae_Ro19	17.4	[14.4 - 21%]	0.7889	0	22.5	[20.2 - 24.9%]	0.1948	0	17.3	[14.7 - 20.3%]	0.8301	0	0.71
Bradyrhizobium erythrophlei GAS401	Bradyrhizobium_sp_17-4	16.7	[13.7 - 20.3%]	0.8121	0	24.1	[21.8 - 26.5%]	0.1814	0.01	16.8	[14.2 - 19.7%]	0.8462	0	2.72
Bradyrhizobium erythrophlei GAS401	Bradyrhizobium_sp_Ai1a-2	17.2	[14.2 - 20.7%]	0.7959	0	22.7	[20.4 - 25.1%]	0.1932	0	17.1	[14.5 - 20.1%]	0.8354	0	1.42
Bradyrhizobium erythrophlei GAS401	Bradyrhizobium_sp_ARR65	16.6	[13.6 - 20.1%]	0.8179	0	22	[19.7 - 24.4%]	0.1993	0	16.6	[14 - 19.5%]	0.8542	0	0.85
Bradyrhizobium erythrophlei GAS401	Bradyrhizobium_sp_AT1	17.5	[14.5 - 21.1%]	0.7848	0	22.3	[20 - 24.7%]	0.1969	0	17.4	[14.8 - 20.4%]	0.8272	0	3.4
Bradyrhizobium erythrophlei GAS401	Bradyrhizobium_sp_BF49	17.6	[14.6 - 21.2%]	0.7819	0	22	[19.7 - 24.4%]	0.1994	0	17.5	[14.8 - 20.4%]	0.8254	0	2.61
Bradyrhizobium erythrophlei GAS401	Bradyrhizobium_sp_BR_10245	17.2	[14.1 - 20.7%]	0.797	0	22.4	[20.1 - 24.9%]	0.1955	0	17.1	[14.5 - 20%]	0.8367	0	2.06
Bradyrhizobium erythrophlei GAS401	Bradyrhizobium_sp_BR_10303	17.7	[14.6 - 21.2%]	0.7803	0	22.7	[20.4 - 25.2%]	0.1929	0	17.5	[14.9 - 20.5%]	0.8226	0	2.09
Bradyrhizobium erythrophlei GAS401	Bradyrhizobium_sp_CCBAU_15544	17.1	[14.1 - 20.6%]	0.7992	0	22.4	[20.1 - 24.8%]	0.1958	0	17	[14.4 - 20%]	0.8385	0	2.58
Bradyrhizobium erythrophlei GAS401	Bradyrhizobium_sp_CCBAU_15615	17.1	[14.1 - 20.7%]	0.7985	0	22.4	[20.1 - 24.8%]	0.1961	0	17	[14.4 - 20%]	0.838	0	2.51
Bradyrhizobium erythrophlei GAS401	Bradyrhizobium_sp_CCBAU_15635	17.2	[14.2 - 20.8%]	0.7954	0	22.3	[20 - 24.8%]	0.1964	0	17.1	[14.5 - 20.1%]	0.8356	0	2.65
Bradyrhizobium erythrophlei GAS401	Bradyrhizobium_sp_CCBAU_41267	17.3	[14.3 - 20.9%]	0.7919	0	22.4	[20.1 - 24.8%]	0.1958	0	17.2	[14.6 - 20.2%]	0.8326	0	2.85
Bradyrhizobium erythrophlei GAS401	Bradyrhizobium_sp_CCBAU_43298	17.1	[14.1 - 20.6%]	0.799	0	22.5	[20.2 - 24.9%]	0.1949	0	17	[14.4 - 20%]	0.8382	0	2.72
Bradyrhizobium erythrophlei GAS401	Bradyrhizobium_sp_CCGE-LA001	17.3	[14.2 - 20.8%]	0.7944	0	22.2	[19.9 - 24.6%]	0.1976	0	17.1	[14.5 - 20.1%]	0.835	0	2.41
Bradyrhizobium erythrophlei GAS401	Bradyrhizobium_sp_CCH4-A6	15	[12.1 - 18.4%]	0.8806	0	20.8	[18.6 - 23.3%]	0.2108	0	15.1	[12.6 - 18%]	0.9058	0	0.26
Bradyrhizobium erythrophlei GAS401	Bradyrhizobium_sp_CCH5-F6	17.1	[14 - 20.6%]	0.8011	0	22.2	[19.9 - 24.6%]	0.1977	0	17	[14.4 - 19.9%]	0.8404	0	2.96
Bradyrhizobium erythrophlei GAS401	Bradyrhizobium_sp_CCH10-C7	14.9	[12 - 18.3%]	0.8846	0	20.9	[18.6 - 23.3%]	0.2105	0	15	[12.5 - 17.9%]	0.9089	0	0.44
Bradyrhizobium erythrophlei GAS401	Bradyrhizobium_sp_Cp5_3	17.2	[14.2 - 20.8%]	0.7948	0	22.4	[20.1 - 24.8%]	0.1959	0	17.1	[14.5 - 20.1%]	0.835	0	2.25
Bradyrhizobium erythrophlei GAS401	Bradyrhizobium_sp_DFCI-1	18.4	[15.3 - 22%]	0.7571	0	22.7	[20.4 - 25.2%]	0.1929	0	18.2	[15.5 - 21.2%]	0.8039	0	3.29
Bradyrhizobium erythrophlei GAS401	Bradyrhizobium_sp_DOA1	17.2	[14.2 - 20.8%]	0.7946	0	22.3	[20 - 24.7%]	0.1966	0	17.1	[14.5 - 20.1%]	0.835	0	2.65
Bradyrhizobium erythrophlei GAS401	Bradyrhizobium_sp_DOA9	17.8	[14.7 - 21.4%]	0.776	0	22.2	[19.9 - 24.6%]	0.1975	0	17.6	[15 - 20.6%]	0.8203	0	3.33
Bradyrhizobium erythrophlei GAS401	Bradyrhizobium_sp_Ec3_3	16.8	[13.8 - 20.3%]	0.8114	0	22.2	[20 - 24.7%]	0.1972	0	16.7	[14.1 - 19.7%]	0.8486	0	1.48
Bradyrhizobium erythrophlei GAS401	Bradyrhizobium_sp_G22	17.5	[14.4 - 21%]	0.7876	0	22.2	[19.9 - 24.6%]	0.1979	0	17.3	[14.7 - 20.3%]	0.8297	0	2.57
Bradyrhizobium erythrophlei GAS401	Bradyrhizobium_sp_Leaf396	16.7	[13.7 - 20.2%]	0.8147	0	22	[19.8 - 24.5%]	0.199	0	16.6	[14.1 - 19.6%]	0.8515	0	2.63
Bradyrhizobium erythrophlei GAS401	Bradyrhizobium_sp_LMTR_3	17.8	[14.7 - 21.3%]	0.7777	0	22.7	[20.4 - 25.2%]	0.1929	0	17.6	[15 - 20.6%]	0.8206	0	1.11
Bradyrhizobium erythrophlei GAS401	Bradyrhizobium_sp_LTSP849	17.9	[14.8 - 21.4%]	0.7733	0	22	[19.8 - 24.5%]	0.1991	0	17.7	[15 - 20.7%]	0.8185	0	2.09
Bradyrhizobium erythrophlei GAS401	Bradyrhizobium_sp_LTSP857	17.8	[14.7 - 21.3%]	0.777	0	22.1	[19.8 - 24.5%]	0.1988	0	17.6	[15 - 20.6%]	0.8213	0	2.13
Bradyrhizobium erythrophlei GAS401	Bradyrhizobium_sp_LTSP885	18.5	[15.4 - 22.1%]	0.7549	0	22.6	[20.3 - 25.1%]	0.1937	0	18.2	[15.6 - 21.2%]	0.8023	0	2.23
Bradyrhizobium erythrophlei GAS401	Bradyrhizobium_sp_LTSPM299	18.2	[15.1 - 21.8%]	0.7636	0	22.5	[20.2 - 25%]	0.1946	0	18	[15.3 - 21%]	0.8096	0	1.66
Bradyrhizobium erythrophlei GAS401	Bradyrhizobium_sp_OHSU_III	18.4	[15.2 - 21.9%]	0.7591	0	22.6	[20.3 - 25%]	0.1939	0	18.1	[15.4 - 21.1%]	0.8058	0	3.55
Bradyrhizobium erythrophlei GAS401	Bradyrhizobium_sp_ORS_278	16.6	[13.6 - 20.1%]	0.8157	0	22	[19.8 - 24.5%]	0.1989	0	16.6	[14 - 19.6%]	0.8523	0	4.35
Bradyrhizobium erythrophlei GAS401	Bradyrhizobium_sp_ORS_285	16.6	[13.6 - 20.1%]	0.8166	0	22.1	[19.8 - 24.5%]	0.1986	0	16.6	[14 - 19.5%]	0.853	0	4.07
Bradyrhizobium erythrophlei GAS401	Bradyrhizobium_sp_ORS_375	16.4	[13.4 - 19.9%]	0.8253	0	22.2	[19.9 - 24.6%]	0.1975	0	16.4	[13.8 - 19.3%]	0.8598	0	4.34
Bradyrhizobium erythrophlei GAS401	Bradyrhizobium_sp_S23321	17.6	[14.5 - 21.1%]	0.7829	0	22.2	[20 - 24.7%]	0.1971	0	17.4	[14.8 - 20.4%]	0.8257	0	3.14
Bradyrhizobium erythrophlei GAS401	Bradyrhizobium_sp_STM_3809	16.6	[13.6 - 20.1%]	0.8163	0	22.5	[20.3 - 25%]	0.1944	0	16.6	[14 - 19.6%]	0.852	0	5.03
Bradyrhizobium erythrophlei GAS401	Bradyrhizobium_sp_STM_3843	16.6	[13.6 - 20.1%]	0.8175	0	21.9	[19.7 - 24.4%]	0.2	0	16.6	[14 - 19.5%]	0.854	0	2.44
Bradyrhizobium erythrophlei GAS401	Bradyrhizobium_sp_th_b2	17.6	[14.6 - 21.2%]	0.7817	0	22.8	[20.5 - 25.3%]	0.192	0	17.5	[14.9 - 20.5%]	0.8236	0	2.11
Bradyrhizobium erythrophlei GAS401	Bradyrhizobium_sp_Tv2a-2	17.4	[14.3 - 20.9%]	0.7911	0	22.2	[19.9 - 24.7%]	0.1973	0	17.2	[14.6 - 20.2%]	0.8323	0	1.04
Bradyrhizobium erythrophlei GAS401	Bradyrhizobium_sp_URHA0002	18.5	[15.4 - 22.1%]	0.7537	0	22.4	[20.2 - 24.9%]	0.1952	0	18.2	[15.6 - 21.2%]	0.8018	0	1.04
Bradyrhizobium erythrophlei GAS401	Bradyrhizobium_sp_URHA0013	17.8	[14.7 - 21.3%]	0.7768	0	21.9	[19.7 - 24.4%]	0.1999	0	17.6	[15 - 20.6%]	0.8214	0	2.61
Bradyrhizobium erythrophlei GAS401	Bradyrhizobium_sp_URHD0069	17.9	[14.8 - 21.4%]	0.774	0	22.7	[20.4 - 25.1%]	0.1933	0	17.7	[15.1 - 20.7%]	0.8177	0	0.48
Bradyrhizobium erythrophlei GAS401	Bradyrhizobium_sp_USDA_3384	17.3	[14.3 - 20.8%]	0.7925	0	22.2	[19.9 - 24.7%]	0.1974	0	17.2	[14.6 - 20.2%]	0.8335	0	2.41
Bradyrhizobium erythrophlei GAS401	Bradyrhizobium_sp_WSM471	17.4	[14.4 - 21%]	0.7885	0	21.9	[19.6 - 24.3%]	0.2003	0	17.3	[14.7 - 20.2%]	0.8309	0	2.25
Bradyrhizobium erythrophlei GAS401	Bradyrhizobium_sp_WSM1253	17.3	[14.2 - 20.8%]	0.7934	0	21.9	[19.6 - 24.3%]	0.2006	0	17.1	[14.5 - 20.1%]	0.8348	0	1.99
Bradyrhizobium erythrophlei GAS401	Bradyrhizobium_sp_WSM1417	17.5	[14.4 - 21%]	0.7869	0	21.9	[19.6 - 24.3%]	0.2003	0	17.3	[14.7 - 20.3%]	0.8296	0	2.01
Bradyrhizobium erythrophlei GAS401	Bradyrhizobium_sp_WSM1743	17.3	[14.2 - 20.8%]	0.7935	0	22.1	[19.9 - 24.6%]	0.1982	0	17.2	[14.6 - 20.1%]	0.8345	0	2.22
Bradyrhizobium erythrophlei GAS401	Bradyrhizobium_sp_WSM2254	17.6	[14.6 - 21.2%]	0.7824	0	22.4	[20.1 - 24.8%]	0.1957	0	17.5	[14.8 - 20.4%]	0.825	0	2.73
Bradyrhizobium erythrophlei GAS401	Bradyrhizobium_sp_WSM2793	17.3	[14.3 - 20.9%]	0.792	0	22.1	[19.8 - 24.5%]	0.1985	0	17.2	[14.6 - 20.2%]	0.8333	0	2.37
Bradyrhizobium erythrophlei GAS401	Bradyrhizobium_sp_WSM3983	17	[14 - 20.6%]	0.8014	0	22	[19.7 - 24.4%]	0.1997	0	17	[14.4 - 19.9%]	0.8411	0	1.81
Bradyrhizobium erythrophlei GAS401	Bradyrhizobium_sp_WSM4349	17.1	[14.1 - 20.6%]	0.7991	0	22	[19.7 - 24.4%]	0.1994	0	17	[14.4 - 20%]	0.8392	0	1.98
Bradyrhizobium erythrophlei GAS401	Bradyrhizobium_sp_YR681	17.4	[14.4 - 21%]	0.7881	0	22.4	[20.1 - 24.8%]	0.196	0	17.3	[14.7 - 20.3%]	0.8296	0	3.56
Bradyrhizobium erythrophlei GAS401	Bradyrhizobium_stylosanthis_BR_446	17.5	[14.5 - 21.1%]	0.7851	0	22.3	[20.1 - 24.8%]	0.1961	0	17.4	[14.8 - 20.4%]	0.8272	0	3.4
Bradyrhizobium erythrophlei GAS401	Bradyrhizobium_tropiciagri_SEMIA_6148	17.6	[14.6 - 21.2%]	0.7822	0	22.8	[20.5 - 25.3%]	0.1919	0	17.5	[14.9 - 20.5%]	0.824	0	2.34
Bradyrhizobium erythrophlei GAS401	Bradyrhizobium_valentinum_LmjM3	17.3	[14.3 - 20.9%]	0.7915	0	23	[20.7 - 25.4%]	0.1907	0	17.3	[14.7 - 20.2%]	0.8313	0	0.76
Bradyrhizobium erythrophlei GAS401	Bradyrhizobium_valentinum_LmjM6	17.4	[14.4 - 20.9%]	0.7894	0	22.8	[20.6 - 25.3%]	0.1916	0	17.3	[14.7 - 20.3%]	0.8297	0	0.72
Bradyrhizobium erythrophlei GAS401	Bradyrhizobium_viridifuturi_SEMIA_690	17.9	[14.8 - 21.4%]	0.7741	0	22.6	[20.4 - 25.1%]	0.1935	0	17.7	[15.1 - 20.7%]	0.8178	0	2.87
Bradyrhizobium erythrophlei GAS401	Bradyrhizobium_yuanmingense_BR3267	17.3	[14.3 - 20.9%]	0.7921	0	22.2	[19.9 - 24.6%]	0.1978	0	17.2	[14.6 - 20.2%]	0.8332	0	2.71
Bradyrhizobium erythrophlei GAS401	Bradyrhizobium_yuanmingense_CCBAU_05623	17.1	[14 - 20.6%]	0.8007	0	22.3	[20 - 24.7%]	0.197	0	17	[14.4 - 19.9%]	0.84	0	2.63
Bradyrhizobium erythrophlei GAS401	Bradyrhizobium_yuanmingense_CCBAU_25021	17.1	[14.1 - 20.6%]	0.8001	0	22.3	[20.1 - 24.8%]	0.1963	0	17	[14.4 - 20%]	0.8394	0	2.65
Bradyrhizobium erythrophlei GAS401	Bradyrhizobium_yuanmingense_CCBAU_35157	17.1	[14.1 - 20.6%]	0.8	0	22.2	[20 - 24.7%]	0.197	0	17	[14.4 - 20%]	0.8394	0	2.78
Bradyrhizobium erythrophlei MT12	Bradyrhizobium huanghuaihaiense CGMCC 1.10948	23.1	[19.8 - 26.8%]	0.6364	0	24.1	[21.8 - 26.6%]	0.1808	0.01	22.2	[19.4 - 25.3%]	0.7022	0	0.12
Bradyrhizobium erythrophlei MT12	Bradyrhizobium lablabi GAS522	25.4	[22.1 - 29%]	0.59	0.01	25.2	[22.9 - 27.7%]	0.1728	0.01	24.2	[21.4 - 27.3%]	0.6609	0	1.48
Bradyrhizobium erythrophlei MT12	Bradyrhizobium ottawaense GAS524	25.3	[22 - 29%]	0.5917	0.01	25.2	[22.9 - 27.7%]	0.1728	0.01	24.1	[21.3 - 27.2%]	0.6622	0	1.51
Bradyrhizobium erythrophlei MT12	Bradyrhizobium sp. CF659	24	[20.7 - 27.7%]	0.6168	0.01	24.3	[22 - 26.7%]	0.1798	0.01	23	[20.2 - 26.1%]	0.6857	0	0.7
Bradyrhizobium erythrophlei MT12	Bradyrhizobium sp. ERR11	22.4	[19.2 - 26.1%]	0.6514	0	23.9	[21.6 - 26.3%]	0.1831	0	21.6	[18.8 - 24.7%]	0.7153	0	0.59
Bradyrhizobium erythrophlei MT12	Bradyrhizobium sp. Gha	21.9	[18.7 - 25.6%]	0.6634	0	23.6	[21.3 - 26.1%]	0.1851	0	21.2	[18.4 - 24.2%]	0.7257	0	0.95
Bradyrhizobium erythrophlei MT12	Bradyrhizobium sp. Ghvi	21.9	[18.6 - 25.5%]	0.6642	0	23.7	[21.4 - 26.1%]	0.1846	0	21.1	[18.4 - 24.2%]	0.7262	0	0.79
Bradyrhizobium erythrophlei MT12	Bradyrhizobium sp. OK095	23.4	[20.1 - 27.1%]	0.6297	0.01	23.6	[21.3 - 26%]	0.1854	0	22.4	[19.6 - 25.5%]	0.6984	0	0.07
Bradyrhizobium erythrophlei MT12	Bradyrhizobium sp. R5	46	[42.6 - 49.4%]	0.3384	6.08	41.9	[39.4 - 44.4%]	0.0933	4.27	44.8	[41.8 - 47.8%]	0.4002	0.65	0.17
Bradyrhizobium erythrophlei MT12	Bradyrhizobium sp. Rc2d	21.9	[18.6 - 25.5%]	0.6642	0	24.1	[21.8 - 26.6%]	0.181	0.01	21.2	[18.4 - 24.3%]	0.7249	0	0.99
Bradyrhizobium erythrophlei MT12	Bradyrhizobium sp. Rc3b	22.8	[19.5 - 26.5%]	0.643	0	24	[21.7 - 26.5%]	0.1818	0.01	21.9	[19.1 - 25%]	0.7079	0	0.15
Bradyrhizobium erythrophlei MT12	Bradyrhizobium yuanmingense CCBAU 10071	22.4	[19.1 - 26%]	0.6529	0	24	[21.7 - 26.5%]	0.1816	0.01	21.6	[18.8 - 24.7%]	0.7159	0	0.05
Bradyrhizobium erythrophlei MT12	Bradyrhizobium yuanmingense CGMCC 1.3531	22.4	[19.1 - 26%]	0.6533	0	24	[21.7 - 26.5%]	0.1816	0.01	21.6	[18.8 - 24.6%]	0.7162	0	0.05
Bradyrhizobium erythrophlei MT12	Mesorhizobium_ciceri_WSM1271_OUTGROUP	13.1	[10.4 - 16.4%]	0.9653	0	18.7	[16.5 - 21.1%]	0.2352	0	13.5	[11.1 - 16.2%]	0.9734	0	1.26
Bradyrhizobium erythrophlei MT12	Bradyrhizobium_diazoefficiens_SEMIA_5080	23.6	[20.3 - 27.3%]	0.6252	0.01	24.3	[21.9 - 26.7%]	0.1799	0.01	22.6	[19.8 - 25.7%]	0.6926	0	0.16
Bradyrhizobium erythrophlei MT12	Bradyrhizobium_diazoefficiens_USDA_110	23.4	[20.1 - 27.1%]	0.6294	0.01	24.3	[22 - 26.8%]	0.1797	0.01	22.5	[19.7 - 25.6%]	0.696	0	0.24
Bradyrhizobium erythrophlei MT12	Bradyrhizobium_elkanii_587	42.7	[39.3 - 46.1%]	0.3669	3.11	42.2	[39.7 - 44.8%]	0.0923	4.59	42	[39 - 45%]	0.4254	0.27	0.18
Bradyrhizobium erythrophlei MT12	Bradyrhizobium_elkanii_BLY3-8	46.5	[43.1 - 49.9%]	0.3342	6.69	41.8	[39.3 - 44.4%]	0.0936	4.2	45.2	[42.2 - 48.2%]	0.3965	0.73	0.01
Bradyrhizobium erythrophlei MT12	Bradyrhizobium_elkanii_BLY6-1	46.5	[43.1 - 49.9%]	0.3341	6.7	41.8	[39.3 - 44.4%]	0.0936	4.2	45.2	[42.2 - 48.2%]	0.3965	0.73	0.01
Bradyrhizobium erythrophlei MT12	Bradyrhizobium_elkanii_CCBAU_05737	45.4	[42 - 48.8%]	0.3436	5.39	42.1	[39.6 - 44.6%]	0.0927	4.48	44.3	[41.3 - 47.3%]	0.4045	0.56	0.31
Bradyrhizobium erythrophlei MT12	Bradyrhizobium_elkanii_CCBAU_43297	45.7	[42.4 - 49.2%]	0.3404	5.81	41.9	[39.4 - 44.4%]	0.0935	4.23	44.6	[41.6 - 47.6%]	0.402	0.61	0.07
Bradyrhizobium erythrophlei MT12	Bradyrhizobium_elkanii_UASWS1015	50.8	[47.4 - 54.2%]	0.3009	13.97	37.9	[35.5 - 40.5%]	0.1067	1.57	47.7	[44.7 - 50.8%]	0.3755	1.52	0.82
Bradyrhizobium erythrophlei MT12	Bradyrhizobium_elkanii_USDA_76	45.7	[42.3 - 49.1%]	0.3405	5.79	41.7	[39.2 - 44.3%]	0.0938	4.11	44.5	[41.5 - 47.6%]	0.4024	0.6	0.1
Bradyrhizobium erythrophlei MT12	Bradyrhizobium_elkanii_USDA_94	47	[43.6 - 50.5%]	0.3298	7.41	41.9	[39.4 - 44.4%]	0.0933	4.28	45.7	[42.7 - 48.7%]	0.3923	0.85	0.07
Bradyrhizobium erythrophlei MT12	Bradyrhizobium_elkanii_USDA_3254	47.7	[44.3 - 51.1%]	0.3246	8.33	41.5	[39 - 44%]	0.0947	3.87	46.1	[43.1 - 49.2%]	0.3885	0.97	0.04
Bradyrhizobium erythrophlei MT12	Bradyrhizobium_elkanii_USDA_3259	48.8	[45.3 - 52.2%]	0.3163	10.02	41.5	[39 - 44.1%]	0.0945	3.93	47.1	[44 - 50.1%]	0.3809	1.26	0.09
Bradyrhizobium erythrophlei MT12	Bradyrhizobium_elkanii_WSM1741	22.7	[19.5 - 26.4%]	0.6445	0	24.4	[22.1 - 26.9%]	0.1788	0.01	21.9	[19.1 - 25%]	0.7081	0	1.73
Bradyrhizobium erythrophlei MT12	Bradyrhizobium_elkanii_WSM2783	23.3	[20 - 27%]	0.6318	0	25.6	[23.3 - 28.1%]	0.1694	0.01	22.6	[19.8 - 25.7%]	0.6942	0	1.47
Bradyrhizobium erythrophlei MT12	Bradyrhizobium_embrapense_SEMIA_6208	58.7	[55.1 - 62.2%]	0.248	37.27	46.5	[43.9 - 49.1%]	0.0802	10.88	56.8	[53.6 - 59.9%]	0.3083	13.92	0.16
Bradyrhizobium erythrophlei MT12	Bradyrhizobium_icense_LMTR_13	22.4	[19.2 - 26.1%]	0.6513	0	24.3	[22 - 26.8%]	0.1794	0.01	21.7	[18.9 - 24.8%]	0.7138	0	1.79
Bradyrhizobium erythrophlei MT12	Bradyrhizobium_japonicum_22	22.6	[19.3 - 26.2%]	0.6486	0	24.2	[21.9 - 26.7%]	0.1805	0.01	21.8	[19 - 24.8%]	0.712	0	0.71
Bradyrhizobium erythrophlei MT12	Bradyrhizobium_japonicum_CCBA_15517	22.1	[18.8 - 25.7%]	0.6591	0	24.3	[22 - 26.7%]	0.1798	0.01	21.4	[18.6 - 24.5%]	0.7204	0	0.42
Bradyrhizobium erythrophlei MT12	Bradyrhizobium_japonicum_CCBAU_15354	22	[18.7 - 25.6%]	0.6617	0	24.3	[22 - 26.8%]	0.1793	0.01	21.3	[18.5 - 24.4%]	0.7224	0	0.49
Bradyrhizobium erythrophlei MT12	Bradyrhizobium_japonicum_CCBAU_15618	22.3	[19 - 25.9%]	0.6548	0	24.2	[21.9 - 26.7%]	0.18	0.01	21.5	[18.8 - 24.6%]	0.717	0	0.4
Bradyrhizobium erythrophlei MT12	Bradyrhizobium_japonicum_CCBAU_25435	22.8	[19.5 - 26.4%]	0.6443	0	24.2	[21.9 - 26.7%]	0.1803	0.01	21.9	[19.1 - 25%]	0.7084	0	0.34
Bradyrhizobium erythrophlei MT12	Bradyrhizobium_japonicum_CCBAU_83623	21.9	[18.7 - 25.6%]	0.6632	0	24.3	[22 - 26.7%]	0.1797	0.01	21.2	[18.5 - 24.3%]	0.7237	0	0.51
Bradyrhizobium erythrophlei MT12	Bradyrhizobium_japonicum_E109	23.3	[20 - 27%]	0.6319	0	24.1	[21.8 - 26.6%]	0.1812	0.01	22.4	[19.6 - 25.5%]	0.6986	0	0.16
Bradyrhizobium erythrophlei MT12	Bradyrhizobium_japonicum_FN1	23.3	[20.1 - 27%]	0.6315	0	24.1	[21.8 - 26.6%]	0.1812	0.01	22.4	[19.6 - 25.5%]	0.6982	0	0.13
Bradyrhizobium erythrophlei MT12	Bradyrhizobium_japonicum_in8p8	21.3	[18 - 24.9%]	0.6793	0	23.6	[21.3 - 26.1%]	0.1853	0	20.6	[17.9 - 23.7%]	0.7387	0	0.03
Bradyrhizobium erythrophlei MT12	Bradyrhizobium_japonicum_Is-1	23.7	[20.4 - 27.3%]	0.6239	0.01	24.2	[21.9 - 26.7%]	0.18	0.01	22.7	[19.9 - 25.8%]	0.6916	0	0.17
Bradyrhizobium erythrophlei MT12	Bradyrhizobium_japonicum_is5	21.3	[18 - 24.9%]	0.6788	0	23.6	[21.3 - 26%]	0.1853	0	20.6	[17.9 - 23.7%]	0.7384	0	0.03
Bradyrhizobium erythrophlei MT12	Bradyrhizobium_japonicum_Is-34	22.4	[19.2 - 26.1%]	0.6511	0	24.3	[21.9 - 26.7%]	0.1799	0.01	21.7	[18.9 - 24.8%]	0.7138	0	0.77
Bradyrhizobium erythrophlei MT12	Bradyrhizobium_japonicum_SEMIA_5079	22.9	[19.7 - 26.6%]	0.6403	0	24.1	[21.8 - 26.6%]	0.1812	0.01	22.1	[19.3 - 25.1%]	0.7055	0	0.28
Bradyrhizobium erythrophlei MT12	Bradyrhizobium_japonicum_USDA_4	22.5	[19.2 - 26.1%]	0.6505	0	24	[21.7 - 26.5%]	0.1819	0	21.7	[18.9 - 24.7%]	0.7141	0	0.14
Bradyrhizobium erythrophlei MT12	Bradyrhizobium_japonicum_USDA_6	23.3	[20 - 27%]	0.6317	0	24.1	[21.8 - 26.6%]	0.1811	0.01	22.4	[19.6 - 25.5%]	0.6984	0	0.15
Bradyrhizobium erythrophlei MT12	Bradyrhizobium_japonicum_USDA_38	22.8	[19.6 - 26.5%]	0.6421	0	24.2	[21.9 - 26.7%]	0.1801	0.01	22	[19.2 - 25.1%]	0.7066	0	0.28
Bradyrhizobium erythrophlei MT12	Bradyrhizobium_japonicum_USDA_122	23.7	[20.4 - 27.3%]	0.6243	0.01	24.2	[21.9 - 26.7%]	0.18	0.01	22.7	[19.9 - 25.8%]	0.6919	0	0.18
Bradyrhizobium erythrophlei MT12	Bradyrhizobium_japonicum_USDA_123	22.3	[19 - 25.9%]	0.6555	0	24.2	[21.9 - 26.6%]	0.1805	0.01	21.5	[18.7 - 24.6%]	0.7177	0	0.55
Bradyrhizobium erythrophlei MT12	Bradyrhizobium_japonicum_USDA_124	23.2	[19.9 - 26.8%]	0.6352	0	24.1	[21.8 - 26.6%]	0.1808	0.01	22.3	[19.4 - 25.3%]	0.7012	0	0.23
Bradyrhizobium erythrophlei MT12	Bradyrhizobium_japonicum_USDA_135	22.1	[18.8 - 25.7%]	0.6596	0	24.2	[21.9 - 26.6%]	0.1806	0.01	21.4	[18.6 - 24.4%]	0.7211	0	0.14
Bradyrhizobium erythrophlei MT12	Bradyrhizobium_jicamae_PAC68	23.5	[20.2 - 27.2%]	0.6272	0.01	24.8	[22.5 - 27.3%]	0.1756	0.01	22.6	[19.8 - 25.7%]	0.6926	0	1.42
Bradyrhizobium erythrophlei MT12	Bradyrhizobium_liaoningense_CCBAU_05525	21.4	[18.1 - 25%]	0.6766	0	24.3	[22 - 26.8%]	0.1792	0.01	20.8	[18 - 23.9%]	0.7345	0	0.02
Bradyrhizobium erythrophlei MT12	Bradyrhizobium_liaoningense_CCBAU_83689	21.5	[18.3 - 25.1%]	0.6731	0	24.3	[22 - 26.7%]	0.1798	0.01	20.9	[18.1 - 24%]	0.7318	0	0.01
Bradyrhizobium erythrophlei MT12	Bradyrhizobium_liaoningense_CCNWSX0360	21.9	[18.7 - 25.6%]	0.6633	0	24.2	[21.8 - 26.6%]	0.1807	0.01	21.2	[18.5 - 24.3%]	0.7241	0	0.11
Bradyrhizobium erythrophlei MT12	Rhizobium_lupini_HPC_L_OUTGROUP	12.7	[10 - 16%]	0.9871	0	17.7	[15.5 - 20%]	0.2488	0	13.1	[10.8 - 15.9%]	0.9903	0	4.6
Bradyrhizobium erythrophlei MT12	Bradyrhizobium_manausense_BR3351	21.5	[18.2 - 25.1%]	0.6742	0	24	[21.7 - 26.5%]	0.1817	0.01	20.8	[18.1 - 23.9%]	0.7334	0	0.95
Bradyrhizobium erythrophlei MT12	Bradyrhizobium_neotropicale_BR_10247	23.1	[19.8 - 26.7%]	0.6373	0	24.1	[21.8 - 26.6%]	0.1809	0.01	22.2	[19.4 - 25.3%]	0.7029	0	0.22
Bradyrhizobium erythrophlei MT12	Bradyrhizobium_oligotrophicum_S58	20.1	[16.9 - 23.7%]	0.7081	0	23.2	[20.9 - 25.6%]	0.1889	0	19.6	[16.9 - 22.7%]	0.7632	0	1.31
Bradyrhizobium erythrophlei MT12	Bradyrhizobium_pachyrhizi_BR3262	48.9	[45.5 - 52.4%]	0.315	10.31	41.4	[38.9 - 44%]	0.0948	3.83	47.2	[44.2 - 50.2%]	0.3799	1.3	0.06
Bradyrhizobium erythrophlei MT12	Bradyrhizobium_pachyrhizi_PAC_48	48.8	[45.4 - 52.2%]	0.3158	10.13	41.2	[38.7 - 43.7%]	0.0957	3.6	47	[44 - 50%]	0.3813	1.24	0.06
Bradyrhizobium erythrophlei MT12	Bradyrhizobium_paxllaeri_LMTR_21	23.9	[20.6 - 27.5%]	0.6198	0.01	24.7	[22.4 - 27.2%]	0.1764	0.01	22.9	[20.1 - 26%]	0.6869	0	1.33
Bradyrhizobium erythrophlei MT12	Bradyrhizobium_retamae_Ro19	22.2	[18.9 - 25.8%]	0.6576	0	24.2	[21.9 - 26.7%]	0.1803	0.01	21.4	[18.7 - 24.5%]	0.7193	0	1.95
Bradyrhizobium erythrophlei MT12	Bradyrhizobium_sp_17-4	48.3	[44.9 - 51.7%]	0.3197	9.3	41.8	[39.3 - 44.3%]	0.0936	4.18	46.8	[43.7 - 49.8%]	0.3834	1.16	0.06
Bradyrhizobium erythrophlei MT12	Bradyrhizobium_sp_Ai1a-2	24.2	[20.9 - 27.9%]	0.6134	0.01	25.4	[23.1 - 27.9%]	0.1711	0.01	23.3	[20.4 - 26.4%]	0.6795	0	1.24
Bradyrhizobium erythrophlei MT12	Bradyrhizobium_sp_ARR65	18.8	[15.7 - 22.4%]	0.7441	0	22.7	[20.4 - 25.1%]	0.1932	0	18.5	[15.9 - 21.5%]	0.7935	0	1.81
Bradyrhizobium erythrophlei MT12	Bradyrhizobium_sp_AT1	23.6	[20.3 - 27.3%]	0.6258	0.01	23.9	[21.5 - 26.3%]	0.1831	0	22.6	[19.8 - 25.7%]	0.6943	0	0.74
Bradyrhizobium erythrophlei MT12	Bradyrhizobium_sp_BF49	22.8	[19.6 - 26.5%]	0.6425	0	23.7	[21.4 - 26.2%]	0.184	0	21.9	[19.1 - 25%]	0.7082	0	0.05
Bradyrhizobium erythrophlei MT12	Bradyrhizobium_sp_BR_10245	22.2	[18.9 - 25.8%]	0.6568	0	24.2	[21.9 - 26.7%]	0.18	0.01	21.5	[18.7 - 24.5%]	0.7186	0	0.6
Bradyrhizobium erythrophlei MT12	Bradyrhizobium_sp_BR_10303	38.8	[35.4 - 42.3%]	0.4046	1.26	31.5	[29.1 - 34%]	0.1342	0.19	36.2	[33.3 - 39.3%]	0.4845	0.03	0.57
Bradyrhizobium erythrophlei MT12	Bradyrhizobium_sp_CCBAU_15544	22.4	[19.1 - 26%]	0.6528	0	24.1	[21.8 - 26.6%]	0.1812	0.01	21.6	[18.8 - 24.7%]	0.7157	0	0.09
Bradyrhizobium erythrophlei MT12	Bradyrhizobium_sp_CCBAU_15615	22.2	[18.9 - 25.8%]	0.6574	0	24.1	[21.8 - 26.5%]	0.1813	0.01	21.4	[18.7 - 24.5%]	0.7195	0	0.15
Bradyrhizobium erythrophlei MT12	Bradyrhizobium_sp_CCBAU_15635	22.5	[19.3 - 26.2%]	0.6493	0	24	[21.7 - 26.5%]	0.1816	0.01	21.7	[18.9 - 24.8%]	0.713	0	0.01
Bradyrhizobium erythrophlei MT12	Bradyrhizobium_sp_CCBAU_41267	23	[19.7 - 26.7%]	0.6383	0	24.4	[22.1 - 26.9%]	0.1784	0.01	22.2	[19.4 - 25.3%]	0.7029	0	0.18
Bradyrhizobium erythrophlei MT12	Bradyrhizobium_sp_CCBAU_43298	22.1	[18.9 - 25.8%]	0.6584	0	24.3	[21.9 - 26.7%]	0.1799	0.01	21.4	[18.6 - 24.5%]	0.7199	0	0.06
Bradyrhizobium erythrophlei MT12	Bradyrhizobium_sp_CCGE-LA001	22.8	[19.5 - 26.4%]	0.6433	0	24	[21.7 - 26.5%]	0.182	0	21.9	[19.1 - 25%]	0.7082	0	0.25
Bradyrhizobium erythrophlei MT12	Bradyrhizobium_sp_CCH4-A6	15.4	[12.5 - 18.9%]	0.8617	0	21.4	[19.2 - 23.9%]	0.2048	0	15.5	[13 - 18.4%]	0.89	0	2.92
Bradyrhizobium erythrophlei MT12	Bradyrhizobium_sp_CCH5-F6	21.9	[18.7 - 25.6%]	0.6631	0	24	[21.7 - 26.5%]	0.1816	0.01	21.2	[18.5 - 24.3%]	0.7243	0	0.3
Bradyrhizobium erythrophlei MT12	Bradyrhizobium_sp_CCH10-C7	15.3	[12.4 - 18.8%]	0.8658	0	21.5	[19.3 - 24%]	0.2037	0	15.4	[12.9 - 18.3%]	0.8932	0	3.1
Bradyrhizobium erythrophlei MT12	Bradyrhizobium_sp_Cp5_3	22.5	[19.2 - 26.1%]	0.6498	0	24.1	[21.8 - 26.6%]	0.1808	0.01	21.7	[18.9 - 24.8%]	0.7131	0	0.41
Bradyrhizobium erythrophlei MT12	Bradyrhizobium_sp_DFCI-1	56.1	[52.5 - 59.5%]	0.2647	28.28	41.2	[38.7 - 43.8%]	0.0954	3.67	53	[49.9 - 56.1%]	0.3349	6	0.62
Bradyrhizobium erythrophlei MT12	Bradyrhizobium_sp_DOA1	22.6	[19.3 - 26.2%]	0.6485	0	24	[21.7 - 26.5%]	0.1818	0	21.7	[19 - 24.8%]	0.7124	0	0.01
Bradyrhizobium erythrophlei MT12	Bradyrhizobium_sp_DOA9	22.8	[19.5 - 26.4%]	0.6441	0	24.2	[21.9 - 26.7%]	0.1804	0.01	21.9	[19.1 - 25%]	0.7083	0	0.67
Bradyrhizobium erythrophlei MT12	Bradyrhizobium_sp_Ec3_3	21	[17.8 - 24.6%]	0.6854	0	24.2	[21.9 - 26.6%]	0.1805	0.01	20.5	[17.7 - 23.5%]	0.7422	0	1.18
Bradyrhizobium erythrophlei MT12	Bradyrhizobium_sp_G22	23.3	[20 - 27%]	0.6318	0	24.2	[21.9 - 26.7%]	0.1803	0.01	22.4	[19.6 - 25.5%]	0.6981	0	0.09
Bradyrhizobium erythrophlei MT12	Bradyrhizobium_sp_Leaf396	21	[17.8 - 24.6%]	0.6864	0	23.6	[21.3 - 26.1%]	0.1851	0	20.4	[17.6 - 23.4%]	0.7445	0	0.04
Bradyrhizobium erythrophlei MT12	Bradyrhizobium_sp_LMTR_3	22.9	[19.6 - 26.5%]	0.6416	0	24.5	[22.2 - 27%]	0.1777	0.01	22.1	[19.3 - 25.1%]	0.7053	0	1.55
Bradyrhizobium erythrophlei MT12	Bradyrhizobium_sp_LTSP849	23.5	[20.2 - 27.1%]	0.6289	0.01	24	[21.7 - 26.5%]	0.182	0	22.5	[19.7 - 25.6%]	0.6964	0	0.58
Bradyrhizobium erythrophlei MT12	Bradyrhizobium_sp_LTSP857	23.5	[20.2 - 27.1%]	0.6281	0.01	24.1	[21.8 - 26.6%]	0.1809	0.01	22.5	[19.7 - 25.6%]	0.6954	0	0.53
Bradyrhizobium erythrophlei MT12	Bradyrhizobium_sp_LTSP885	40.5	[37.1 - 44%]	0.3875	1.91	31	[28.6 - 33.5%]	0.1368	0.16	37.4	[34.5 - 40.5%]	0.4713	0.05	0.43
Bradyrhizobium erythrophlei MT12	Bradyrhizobium_sp_LTSPM299	38	[34.6 - 41.5%]	0.4133	1.02	30.7	[28.3 - 33.2%]	0.1384	0.14	35.4	[32.4 - 38.4%]	0.4945	0.02	1
Bradyrhizobium erythrophlei MT12	Bradyrhizobium_sp_OHSU_III	51.2	[47.7 - 54.6%]	0.2982	14.79	38	[35.5 - 40.5%]	0.1065	1.59	48	[45 - 51.1%]	0.373	1.66	0.89
Bradyrhizobium erythrophlei MT12	Bradyrhizobium_sp_ORS_278	20.3	[17.1 - 23.9%]	0.7045	0	23.1	[20.8 - 25.5%]	0.1896	0	19.7	[17 - 22.8%]	0.7605	0	1.69
Bradyrhizobium erythrophlei MT12	Bradyrhizobium_sp_ORS_285	20.3	[17.1 - 23.9%]	0.7042	0	23.1	[20.8 - 25.6%]	0.1894	0	19.8	[17 - 22.8%]	0.7602	0	1.41
Bradyrhizobium erythrophlei MT12	Bradyrhizobium_sp_ORS_375	19.9	[16.7 - 23.5%]	0.7147	0	23.3	[21 - 25.7%]	0.188	0	19.5	[16.7 - 22.5%]	0.7683	0	1.67
Bradyrhizobium erythrophlei MT12	Bradyrhizobium_sp_S23321	23.8	[20.5 - 27.5%]	0.6208	0.01	23.8	[21.5 - 26.3%]	0.1835	0	22.8	[19.9 - 25.8%]	0.6904	0	0.48
Bradyrhizobium erythrophlei MT12	Bradyrhizobium_sp_STM_3809	20.7	[17.5 - 24.3%]	0.6941	0	23.6	[21.3 - 26.1%]	0.1853	0	20.1	[17.4 - 23.2%]	0.7508	0	2.36
Bradyrhizobium erythrophlei MT12	Bradyrhizobium_sp_STM_3843	19.2	[16.1 - 22.8%]	0.733	0	23.3	[21 - 25.7%]	0.188	0	18.9	[16.2 - 21.9%]	0.7832	0	0.22
Bradyrhizobium erythrophlei MT12	Bradyrhizobium_sp_th_b2	46.2	[42.9 - 49.7%]	0.3362	6.39	41.1	[38.6 - 43.6%]	0.0959	3.54	44.8	[41.8 - 47.8%]	0.3999	0.65	0.55
Bradyrhizobium erythrophlei MT12	Bradyrhizobium_sp_Tv2a-2	20.5	[17.3 - 24.1%]	0.6995	0	23.2	[20.9 - 25.6%]	0.1889	0	19.9	[17.2 - 23%]	0.7563	0	1.62
Bradyrhizobium erythrophlei MT12	Bradyrhizobium_sp_URHA0002	24.2	[20.9 - 27.9%]	0.6129	0.01	24.3	[21.9 - 26.7%]	0.1799	0.01	23.1	[20.3 - 26.2%]	0.6826	0	1.62
Bradyrhizobium erythrophlei MT12	Bradyrhizobium_sp_URHA0013	23.4	[20.1 - 27.1%]	0.6299	0.01	23.7	[21.4 - 26.2%]	0.1844	0	22.4	[19.6 - 25.5%]	0.6982	0	0.06
Bradyrhizobium erythrophlei MT12	Bradyrhizobium_sp_URHD0069	18.3	[15.2 - 21.8%]	0.7614	0	23.1	[20.8 - 25.6%]	0.1895	0	18.1	[15.4 - 21.1%]	0.8066	0	3.14
Bradyrhizobium erythrophlei MT12	Bradyrhizobium_sp_USDA_3384	22.8	[19.5 - 26.4%]	0.6431	0	24.2	[21.9 - 26.7%]	0.1801	0.01	22	[19.2 - 25%]	0.7074	0	0.26
Bradyrhizobium erythrophlei MT12	Bradyrhizobium_sp_WSM471	22.5	[19.2 - 26.2%]	0.6496	0	23.9	[21.6 - 26.3%]	0.1829	0	21.7	[18.9 - 24.8%]	0.7137	0	0.41
Bradyrhizobium erythrophlei MT12	Bradyrhizobium_sp_WSM1253	22	[18.8 - 25.7%]	0.6604	0	23.9	[21.6 - 26.4%]	0.1827	0	21.3	[18.5 - 24.4%]	0.7225	0	0.68
Bradyrhizobium erythrophlei MT12	Bradyrhizobium_sp_WSM1417	22.5	[19.2 - 26.2%]	0.6496	0	23.7	[21.4 - 26.2%]	0.184	0	21.7	[18.9 - 24.7%]	0.714	0	0.65
Bradyrhizobium erythrophlei MT12	Bradyrhizobium_sp_WSM1743	22.4	[19.2 - 26.1%]	0.6513	0	24.1	[21.8 - 26.5%]	0.1813	0.01	21.7	[18.9 - 24.7%]	0.7145	0	0.44
Bradyrhizobium erythrophlei MT12	Bradyrhizobium_sp_WSM2254	23.3	[20 - 27%]	0.6316	0	24.4	[22 - 26.8%]	0.1791	0.01	22.4	[19.6 - 25.5%]	0.6976	0	0.06
Bradyrhizobium erythrophlei MT12	Bradyrhizobium_sp_WSM2793	22.6	[19.3 - 26.3%]	0.6473	0	24	[21.7 - 26.4%]	0.1823	0	21.8	[19 - 24.9%]	0.7116	0	0.29
Bradyrhizobium erythrophlei MT12	Bradyrhizobium_sp_WSM3983	22.6	[19.4 - 26.3%]	0.6466	0	23.7	[21.4 - 26.2%]	0.1841	0	21.8	[19 - 24.9%]	0.7116	0	0.85
Bradyrhizobium erythrophlei MT12	Bradyrhizobium_sp_WSM4349	22.2	[18.9 - 25.8%]	0.6579	0	23.8	[21.5 - 26.2%]	0.1838	0	21.4	[18.6 - 24.4%]	0.7208	0	0.68
Bradyrhizobium erythrophlei MT12	Bradyrhizobium_sp_YR681	23.6	[20.3 - 27.2%]	0.6264	0.01	24.1	[21.8 - 26.6%]	0.181	0.01	22.6	[19.8 - 25.7%]	0.6941	0	0.9
Bradyrhizobium erythrophlei MT12	Bradyrhizobium_stylosanthis_BR_446	23.6	[20.4 - 27.3%]	0.6249	0.01	24.3	[22 - 26.8%]	0.1795	0.01	22.7	[19.8 - 25.8%]	0.6922	0	0.74
Bradyrhizobium erythrophlei MT12	Bradyrhizobium_tropiciagri_SEMIA_6148	49.4	[46 - 52.8%]	0.3113	11.19	42.3	[39.8 - 44.8%]	0.0922	4.65	47.8	[44.8 - 50.8%]	0.3747	1.56	0.33
Bradyrhizobium erythrophlei MT12	Bradyrhizobium_valentinum_LmjM3	22.3	[19.1 - 26%]	0.6535	0	24.5	[22.2 - 27%]	0.1778	0.01	21.6	[18.8 - 24.7%]	0.7151	0	1.9
Bradyrhizobium erythrophlei MT12	Bradyrhizobium_valentinum_LmjM6	22.3	[19 - 25.9%]	0.6546	0	24.4	[22.1 - 26.9%]	0.1786	0.01	21.6	[18.8 - 24.6%]	0.7163	0	1.94
Bradyrhizobium erythrophlei MT12	Bradyrhizobium_viridifuturi_SEMIA_690	54	[50.5 - 57.5%]	0.2783	22.04	41.6	[39.1 - 44.1%]	0.0943	3.98	51.5	[48.4 - 54.5%]	0.3464	4.1	0.21
Bradyrhizobium erythrophlei MT12	Bradyrhizobium_yuanmingense_BR3267	22.6	[19.3 - 26.2%]	0.6487	0	24.1	[21.8 - 26.6%]	0.1813	0.01	21.7	[19 - 24.8%]	0.7123	0	0.05
Bradyrhizobium erythrophlei MT12	Bradyrhizobium_yuanmingense_CCBAU_05623	22.1	[18.8 - 25.7%]	0.6599	0	24.2	[21.8 - 26.6%]	0.1807	0.01	21.4	[18.6 - 24.4%]	0.7214	0	0.03
Bradyrhizobium erythrophlei MT12	Bradyrhizobium_yuanmingense_CCBAU_25021	22.3	[19 - 25.9%]	0.6544	0	24.1	[21.8 - 26.6%]	0.1808	0.01	21.5	[18.8 - 24.6%]	0.7169	0	0.01
Bradyrhizobium erythrophlei MT12	Bradyrhizobium_yuanmingense_CCBAU_35157	22.1	[18.9 - 25.8%]	0.6584	0	24.2	[21.9 - 26.7%]	0.1805	0.01	21.4	[18.6 - 24.5%]	0.7201	0	0.12
Bradyrhizobium huanghuaihaiense CGMCC 1.10948	Bradyrhizobium lablabi GAS522	21.8	[18.5 - 25.4%]	0.6669	0	23.1	[20.8 - 25.6%]	0.1894	0	21	[18.2 - 24%]	0.73	0	1.6
Bradyrhizobium huanghuaihaiense CGMCC 1.10948	Bradyrhizobium ottawaense GAS524	21.7	[18.5 - 25.4%]	0.6679	0	23.1	[20.8 - 25.6%]	0.1895	0	20.9	[18.2 - 24%]	0.7309	0	1.63
Bradyrhizobium huanghuaihaiense CGMCC 1.10948	Bradyrhizobium sp. CF659	53.1	[49.6 - 56.6%]	0.2844	19.58	38.4	[36 - 40.9%]	0.1049	1.8	49.7	[46.7 - 52.8%]	0.3595	2.63	0.58
Bradyrhizobium huanghuaihaiense CGMCC 1.10948	Bradyrhizobium sp. ERR11	47.7	[44.3 - 51.2%]	0.3243	8.39	35.6	[33.2 - 38.2%]	0.1155	0.81	44.5	[41.5 - 47.6%]	0.4023	0.6	0.71
Bradyrhizobium huanghuaihaiense CGMCC 1.10948	Bradyrhizobium sp. Gha	37.4	[34 - 40.9%]	0.4193	0.88	31.7	[29.3 - 34.2%]	0.1332	0.21	35.2	[32.2 - 38.3%]	0.4967	0.02	1.07
Bradyrhizobium huanghuaihaiense CGMCC 1.10948	Bradyrhizobium sp. Ghvi	39.7	[36.3 - 43.2%]	0.3954	1.57	32	[29.6 - 34.5%]	0.1316	0.24	37.1	[34.1 - 40.2%]	0.4749	0.05	0.91
Bradyrhizobium huanghuaihaiense CGMCC 1.10948	Bradyrhizobium sp. OK095	49.3	[45.8 - 52.7%]	0.3125	10.89	35.5	[33.1 - 38.1%]	0.1159	0.78	45.7	[42.7 - 48.7%]	0.3922	0.85	0.05
Bradyrhizobium huanghuaihaiense CGMCC 1.10948	Bradyrhizobium sp. R5	24.1	[20.8 - 27.8%]	0.6154	0.01	24.3	[22 - 26.7%]	0.1797	0.01	23	[20.2 - 26.1%]	0.6845	0	0.29
Bradyrhizobium huanghuaihaiense CGMCC 1.10948	Bradyrhizobium sp. Rc2d	43.1	[39.8 - 46.6%]	0.3628	3.43	35.2	[32.8 - 37.7%]	0.1173	0.7	40.7	[37.7 - 43.8%]	0.4376	0.17	1.11
Bradyrhizobium huanghuaihaiense CGMCC 1.10948	Bradyrhizobium sp. Rc3b	49.4	[46 - 52.8%]	0.3113	11.19	35.5	[33.1 - 38.1%]	0.116	0.78	45.8	[42.8 - 48.9%]	0.3911	0.88	0.26
Bradyrhizobium huanghuaihaiense CGMCC 1.10948	Bradyrhizobium yuanmingense CCBAU 10071	46	[42.6 - 49.4%]	0.3384	6.08	35.5	[33.1 - 38%]	0.1161	0.77	43.1	[40.1 - 46.1%]	0.4152	0.38	0.17
Bradyrhizobium huanghuaihaiense CGMCC 1.10948	Bradyrhizobium yuanmingense CGMCC 1.3531	45.9	[42.5 - 49.4%]	0.3388	6.02	35.5	[33 - 38%]	0.1162	0.77	43	[40.1 - 46.1%]	0.4156	0.38	0.17
Bradyrhizobium huanghuaihaiense CGMCC 1.10948	Mesorhizobium_ciceri_WSM1271_OUTGROUP	13.2	[10.4 - 16.5%]	0.9638	0	18.6	[16.4 - 21%]	0.2365	0	13.5	[11.1 - 16.3%]	0.9724	0	1.38
Bradyrhizobium huanghuaihaiense CGMCC 1.10948	Bradyrhizobium_diazoefficiens_SEMIA_5080	61.6	[57.9 - 65.1%]	0.2305	47.71	42.2	[39.7 - 44.7%]	0.0924	4.56	57.8	[54.6 - 61%]	0.3017	16.95	0.04
Bradyrhizobium huanghuaihaiense CGMCC 1.10948	Bradyrhizobium_diazoefficiens_USDA_110	62.3	[58.6 - 65.9%]	0.226	50.51	42.1	[39.6 - 44.6%]	0.0928	4.45	58.4	[55.2 - 61.5%]	0.2978	18.96	0.12
Bradyrhizobium huanghuaihaiense CGMCC 1.10948	Bradyrhizobium_elkanii_587	22.5	[19.2 - 26.1%]	0.6507	0	26.6	[24.3 - 29.1%]	0.1627	0.02	22	[19.2 - 25%]	0.7075	0	0.3
Bradyrhizobium huanghuaihaiense CGMCC 1.10948	Bradyrhizobium_elkanii_BLY3-8	23.8	[20.5 - 27.5%]	0.6207	0.01	24.4	[22 - 26.8%]	0.1791	0.01	22.8	[20 - 25.9%]	0.6886	0	0.13
Bradyrhizobium huanghuaihaiense CGMCC 1.10948	Bradyrhizobium_elkanii_BLY6-1	23.9	[20.6 - 27.5%]	0.6205	0.01	24.4	[22 - 26.8%]	0.1791	0.01	22.8	[20 - 25.9%]	0.6885	0	0.13
Bradyrhizobium huanghuaihaiense CGMCC 1.10948	Bradyrhizobium_elkanii_CCBAU_05737	24.3	[21 - 27.9%]	0.612	0.01	26.1	[23.7 - 28.6%]	0.1664	0.02	23.4	[20.6 - 26.5%]	0.6765	0	0.43
Bradyrhizobium huanghuaihaiense CGMCC 1.10948	Bradyrhizobium_elkanii_CCBAU_43297	23.7	[20.4 - 27.3%]	0.6238	0.01	25.1	[22.8 - 27.6%]	0.1733	0.01	22.8	[20 - 25.9%]	0.689	0	0.19
Bradyrhizobium huanghuaihaiense CGMCC 1.10948	Bradyrhizobium_elkanii_UASWS1015	23.3	[20 - 26.9%]	0.6331	0	24	[21.7 - 26.5%]	0.1818	0	22.3	[19.5 - 25.4%]	0.6998	0	0.7
Bradyrhizobium huanghuaihaiense CGMCC 1.10948	Bradyrhizobium_elkanii_USDA_76	24.7	[21.4 - 28.4%]	0.6031	0.01	25.5	[23.1 - 27.9%]	0.1708	0.01	23.7	[20.9 - 26.8%]	0.6709	0	0.22
Bradyrhizobium huanghuaihaiense CGMCC 1.10948	Bradyrhizobium_elkanii_USDA_94	24.2	[20.9 - 27.9%]	0.6129	0.01	24.7	[22.4 - 27.2%]	0.1763	0.01	23.2	[20.4 - 26.3%]	0.6812	0	0.19
Bradyrhizobium huanghuaihaiense CGMCC 1.10948	Bradyrhizobium_elkanii_USDA_3254	24.2	[20.9 - 27.9%]	0.6132	0.01	24.4	[22.1 - 26.9%]	0.1786	0.01	23.1	[20.3 - 26.2%]	0.6823	0	0.16
Bradyrhizobium huanghuaihaiense CGMCC 1.10948	Bradyrhizobium_elkanii_USDA_3259	24.4	[21.1 - 28%]	0.6098	0.01	24.4	[22.1 - 26.9%]	0.1786	0.01	23.3	[20.4 - 26.4%]	0.6795	0	0.03
Bradyrhizobium huanghuaihaiense CGMCC 1.10948	Bradyrhizobium_elkanii_WSM1741	21.8	[18.6 - 25.5%]	0.6653	0	22.9	[20.6 - 25.4%]	0.1909	0	21	[18.2 - 24.1%]	0.7292	0	1.84
Bradyrhizobium huanghuaihaiense CGMCC 1.10948	Bradyrhizobium_elkanii_WSM2783	21.4	[18.2 - 25.1%]	0.6748	0	24	[21.7 - 26.5%]	0.182	0	20.8	[18.1 - 23.9%]	0.734	0	1.59
Bradyrhizobium huanghuaihaiense CGMCC 1.10948	Bradyrhizobium_embrapense_SEMIA_6208	24.1	[20.8 - 27.7%]	0.616	0.01	24.1	[21.7 - 26.5%]	0.1815	0.01	23	[20.1 - 26.1%]	0.6857	0	0.04
Bradyrhizobium huanghuaihaiense CGMCC 1.10948	Bradyrhizobium_icense_LMTR_13	21.5	[18.3 - 25.1%]	0.6731	0	22.8	[20.5 - 25.3%]	0.192	0	20.7	[18 - 23.8%]	0.7358	0	1.91
Bradyrhizobium huanghuaihaiense CGMCC 1.10948	Bradyrhizobium_japonicum_22	40	[36.6 - 43.4%]	0.3927	1.68	34.9	[32.5 - 37.4%]	0.1187	0.63	38	[35.1 - 41.1%]	0.4648	0.07	0.59
Bradyrhizobium huanghuaihaiense CGMCC 1.10948	Bradyrhizobium_japonicum_CCBA_15517	47	[43.6 - 50.4%]	0.33	7.37	38.1	[35.7 - 40.7%]	0.1059	1.67	44.7	[41.7 - 47.7%]	0.4009	0.63	0.54
Bradyrhizobium huanghuaihaiense CGMCC 1.10948	Bradyrhizobium_japonicum_CCBAU_15354	46.8	[43.4 - 50.3%]	0.3314	7.13	38.4	[35.9 - 40.9%]	0.1051	1.78	44.6	[41.6 - 47.6%]	0.4017	0.61	0.61
Bradyrhizobium huanghuaihaiense CGMCC 1.10948	Bradyrhizobium_japonicum_CCBAU_15618	54	[50.5 - 57.5%]	0.2783	22.05	40.1	[37.6 - 42.6%]	0.0992	2.77	51	[47.9 - 54.1%]	0.3499	3.64	0.52
Bradyrhizobium huanghuaihaiense CGMCC 1.10948	Bradyrhizobium_japonicum_CCBAU_25435	51.3	[47.8 - 54.7%]	0.2975	15.02	38.9	[36.5 - 41.5%]	0.1031	2.06	48.4	[45.4 - 51.5%]	0.3699	1.84	0.46
Bradyrhizobium huanghuaihaiense CGMCC 1.10948	Bradyrhizobium_japonicum_CCBAU_83623	46.9	[43.5 - 50.4%]	0.3305	7.28	38.3	[35.8 - 40.8%]	0.1054	1.73	44.7	[41.7 - 47.7%]	0.4011	0.62	0.63
Bradyrhizobium huanghuaihaiense CGMCC 1.10948	Bradyrhizobium_japonicum_E109	56.7	[53.2 - 60.2%]	0.2604	30.49	39.4	[37 - 42%]	0.1014	2.35	53	[49.9 - 56%]	0.3354	5.91	0.28
Bradyrhizobium huanghuaihaiense CGMCC 1.10948	Bradyrhizobium_japonicum_FN1	56.4	[52.8 - 59.9%]	0.2624	29.46	39.3	[36.8 - 41.8%]	0.102	2.25	52.6	[49.5 - 55.7%]	0.3376	5.48	0.25
Bradyrhizobium huanghuaihaiense CGMCC 1.10948	Bradyrhizobium_japonicum_in8p8	37.1	[33.7 - 40.6%]	0.4225	0.82	33.3	[30.9 - 35.8%]	0.1255	0.38	35.3	[32.4 - 38.4%]	0.495	0.02	0.15
Bradyrhizobium huanghuaihaiense CGMCC 1.10948	Bradyrhizobium_japonicum_Is-1	61.6	[57.9 - 65.2%]	0.2302	47.93	42.1	[39.6 - 44.6%]	0.0928	4.46	57.8	[54.6 - 61%]	0.3016	17	0.05
Bradyrhizobium huanghuaihaiense CGMCC 1.10948	Bradyrhizobium_japonicum_is5	37.2	[33.8 - 40.7%]	0.4219	0.83	33.3	[30.9 - 35.8%]	0.1255	0.38	35.4	[32.4 - 38.4%]	0.4944	0.02	0.15
Bradyrhizobium huanghuaihaiense CGMCC 1.10948	Bradyrhizobium_japonicum_Is-34	48.6	[45.2 - 52.1%]	0.3173	9.8	39	[36.6 - 41.6%]	0.1027	2.12	46.3	[43.3 - 49.3%]	0.3874	1	0.89
Bradyrhizobium huanghuaihaiense CGMCC 1.10948	Bradyrhizobium_japonicum_SEMIA_5079	53.7	[50.2 - 57.2%]	0.2801	21.28	39.4	[36.9 - 41.9%]	0.1015	2.33	50.6	[47.5 - 53.6%]	0.3532	3.26	0.39
Bradyrhizobium huanghuaihaiense CGMCC 1.10948	Bradyrhizobium_japonicum_USDA_4	55.5	[52 - 59%]	0.2682	26.61	39.2	[36.8 - 41.8%]	0.102	2.24	51.9	[48.9 - 55%]	0.3428	4.61	0.26
Bradyrhizobium huanghuaihaiense CGMCC 1.10948	Bradyrhizobium_japonicum_USDA_6	56.4	[52.8 - 59.9%]	0.2625	29.43	39.3	[36.9 - 41.9%]	0.1017	2.29	52.7	[49.6 - 55.7%]	0.3375	5.51	0.27
Bradyrhizobium huanghuaihaiense CGMCC 1.10948	Bradyrhizobium_japonicum_USDA_38	52.8	[49.3 - 56.3%]	0.2866	18.74	39.4	[37 - 42%]	0.1013	2.36	49.8	[46.8 - 52.9%]	0.3589	2.68	0.4
Bradyrhizobium huanghuaihaiense CGMCC 1.10948	Bradyrhizobium_japonicum_USDA_122	61.8	[58.1 - 65.4%]	0.2292	48.51	42.1	[39.6 - 44.7%]	0.0927	4.48	58	[54.8 - 61.1%]	0.3007	17.46	0.06
Bradyrhizobium huanghuaihaiense CGMCC 1.10948	Bradyrhizobium_japonicum_USDA_123	46.2	[42.8 - 49.6%]	0.3364	6.37	38.3	[35.8 - 40.8%]	0.1053	1.75	44.1	[41.1 - 47.1%]	0.4062	0.52	0.66
Bradyrhizobium huanghuaihaiense CGMCC 1.10948	Bradyrhizobium_japonicum_USDA_124	97.2	[95.5 - 98.2%]	0.0359	99.08	99.8	[99.7 - 99.9%]	0.0004	98.25	98.6	[97.7 - 99.1%]	0.0363	99.95	0.11
Bradyrhizobium huanghuaihaiense CGMCC 1.10948	Bradyrhizobium_japonicum_USDA_135	46.3	[43 - 49.8%]	0.3354	6.52	37.5	[35.1 - 40%]	0.1082	1.41	44	[41 - 47%]	0.4072	0.5	0.02
Bradyrhizobium huanghuaihaiense CGMCC 1.10948	Bradyrhizobium_jicamae_PAC68	22.4	[19.1 - 26%]	0.6522	0	23.3	[21 - 25.8%]	0.1874	0	21.5	[18.7 - 24.6%]	0.7174	0	1.54
Bradyrhizobium huanghuaihaiense CGMCC 1.10948	Bradyrhizobium_liaoningense_CCBAU_05525	44.9	[41.5 - 48.3%]	0.3473	4.95	37.7	[35.3 - 40.2%]	0.1075	1.48	42.8	[39.9 - 45.9%]	0.4174	0.35	0.14
Bradyrhizobium huanghuaihaiense CGMCC 1.10948	Bradyrhizobium_liaoningense_CCBAU_83689	44.5	[41.1 - 47.9%]	0.3511	4.53	37.4	[35 - 39.9%]	0.1086	1.36	42.4	[39.4 - 45.4%]	0.4216	0.31	0.1
Bradyrhizobium huanghuaihaiense CGMCC 1.10948	Bradyrhizobium_liaoningense_CCNWSX0360	43.4	[40.1 - 46.9%]	0.3602	3.65	35.6	[33.2 - 38.1%]	0.1157	0.8	41.1	[38.1 - 44.1%]	0.4342	0.2	0.23
Bradyrhizobium huanghuaihaiense CGMCC 1.10948	Rhizobium_lupini_HPC_L_OUTGROUP	12.7	[10 - 16%]	0.9872	0	17.8	[15.7 - 20.2%]	0.2462	0	13.1	[10.8 - 15.9%]	0.9903	0	4.72
Bradyrhizobium huanghuaihaiense CGMCC 1.10948	Bradyrhizobium_manausense_BR3351	37.1	[33.8 - 40.6%]	0.4223	0.82	32.4	[30 - 34.9%]	0.1297	0.27	35.1	[32.2 - 38.2%]	0.4973	0.02	1.07
Bradyrhizobium huanghuaihaiense CGMCC 1.10948	Bradyrhizobium_neotropicale_BR_10247	41.4	[38 - 44.8%]	0.3794	2.32	31.7	[29.3 - 34.2%]	0.1331	0.21	38.3	[35.4 - 41.4%]	0.4619	0.07	0.34
Bradyrhizobium huanghuaihaiense CGMCC 1.10948	Bradyrhizobium_oligotrophicum_S58	21.5	[18.3 - 25.1%]	0.6732	0	23.1	[20.8 - 25.6%]	0.1893	0	20.8	[18 - 23.8%]	0.7351	0	1.19
Bradyrhizobium huanghuaihaiense CGMCC 1.10948	Bradyrhizobium_pachyrhizi_BR3262	24.2	[20.9 - 27.8%]	0.6142	0.01	24.2	[21.9 - 26.7%]	0.18	0.01	23.1	[20.2 - 26.2%]	0.6836	0	0.18
Bradyrhizobium huanghuaihaiense CGMCC 1.10948	Bradyrhizobium_pachyrhizi_PAC_48	24.3	[21 - 27.9%]	0.6119	0.01	24.3	[22 - 26.8%]	0.1796	0.01	23.2	[20.3 - 26.3%]	0.6816	0	0.18
Bradyrhizobium huanghuaihaiense CGMCC 1.10948	Bradyrhizobium_paxllaeri_LMTR_21	22.6	[19.4 - 26.3%]	0.6471	0	23.2	[20.9 - 25.7%]	0.1884	0	21.7	[18.9 - 24.8%]	0.7135	0	1.45
Bradyrhizobium huanghuaihaiense CGMCC 1.10948	Bradyrhizobium_retamae_Ro19	21.4	[18.1 - 25%]	0.6763	0	22.7	[20.4 - 25.1%]	0.1932	0	20.6	[17.9 - 23.7%]	0.7388	0	2.07
Bradyrhizobium huanghuaihaiense CGMCC 1.10948	Bradyrhizobium_sp_17-4	20.4	[17.2 - 24%]	0.701	0	25.4	[23.1 - 27.9%]	0.1709	0.01	20.1	[17.3 - 23.1%]	0.7521	0	0.06
Bradyrhizobium huanghuaihaiense CGMCC 1.10948	Bradyrhizobium_sp_Ai1a-2	21.6	[18.4 - 25.3%]	0.6699	0	23.9	[21.6 - 26.3%]	0.1829	0	21	[18.2 - 24%]	0.7303	0	1.36
Bradyrhizobium huanghuaihaiense CGMCC 1.10948	Bradyrhizobium_sp_ARR65	19.6	[16.5 - 23.2%]	0.7218	0	22.6	[20.3 - 25.1%]	0.1937	0	19.2	[16.5 - 22.2%]	0.7757	0	1.93
Bradyrhizobium huanghuaihaiense CGMCC 1.10948	Bradyrhizobium_sp_AT1	47.1	[43.7 - 50.5%]	0.3296	7.43	35.1	[32.7 - 37.7%]	0.1176	0.69	43.8	[40.9 - 46.9%]	0.4084	0.48	0.62
Bradyrhizobium huanghuaihaiense CGMCC 1.10948	Bradyrhizobium_sp_BF49	44	[40.7 - 47.5%]	0.355	4.13	33.9	[31.5 - 36.4%]	0.1228	0.46	41.1	[38.1 - 44.1%]	0.4341	0.2	0.17
Bradyrhizobium huanghuaihaiense CGMCC 1.10948	Bradyrhizobium_sp_BR_10245	38.2	[34.8 - 41.6%]	0.4114	1.07	32.1	[29.6 - 34.6%]	0.1315	0.24	35.9	[32.9 - 38.9%]	0.4888	0.03	0.72
Bradyrhizobium huanghuaihaiense CGMCC 1.10948	Bradyrhizobium_sp_BR_10303	22.9	[19.6 - 26.5%]	0.6417	0	23.8	[21.5 - 26.3%]	0.1833	0	22	[19.2 - 25%]	0.7074	0	0.69
Bradyrhizobium huanghuaihaiense CGMCC 1.10948	Bradyrhizobium_sp_CCBAU_15544	57	[53.5 - 60.6%]	0.2584	31.56	39.6	[37.2 - 42.2%]	0.1006	2.48	53.3	[50.2 - 56.4%]	0.333	6.38	0.2
Bradyrhizobium huanghuaihaiense CGMCC 1.10948	Bradyrhizobium_sp_CCBAU_15615	54.7	[51.2 - 58.2%]	0.2737	24.06	39.4	[36.9 - 41.9%]	0.1015	2.34	51.3	[48.3 - 54.4%]	0.3473	3.96	0.27
Bradyrhizobium huanghuaihaiense CGMCC 1.10948	Bradyrhizobium_sp_CCBAU_15635	57.6	[54 - 61.1%]	0.2549	33.41	39.3	[36.9 - 41.9%]	0.1017	2.3	53.6	[50.5 - 56.7%]	0.3307	6.89	0.13
Bradyrhizobium huanghuaihaiense CGMCC 1.10948	Bradyrhizobium_sp_CCBAU_41267	61.7	[57.9 - 65.2%]	0.2301	48	42.2	[39.7 - 44.7%]	0.0924	4.57	57.9	[54.7 - 61%]	0.3012	17.18	0.06
Bradyrhizobium huanghuaihaiense CGMCC 1.10948	Bradyrhizobium_sp_CCBAU_43298	51.4	[47.9 - 54.8%]	0.2969	15.2	39.5	[37 - 42%]	0.1012	2.38	48.6	[45.6 - 51.7%]	0.368	1.96	0.06
Bradyrhizobium huanghuaihaiense CGMCC 1.10948	Bradyrhizobium_sp_CCGE-LA001	44.2	[40.8 - 47.6%]	0.3533	4.29	34.3	[31.9 - 36.9%]	0.121	0.53	41.3	[38.4 - 44.4%]	0.4316	0.22	0.37
Bradyrhizobium huanghuaihaiense CGMCC 1.10948	Bradyrhizobium_sp_CCH4-A6	15.1	[12.2 - 18.5%]	0.876	0	21.4	[19.1 - 23.8%]	0.2052	0	15.2	[12.7 - 18.1%]	0.9015	0	3.04
Bradyrhizobium huanghuaihaiense CGMCC 1.10948	Bradyrhizobium_sp_CCH5-F6	39.8	[36.5 - 43.3%]	0.3941	1.62	34.8	[32.4 - 37.3%]	0.1189	0.62	37.9	[35 - 41%]	0.4661	0.06	0.18
Bradyrhizobium huanghuaihaiense CGMCC 1.10948	Bradyrhizobium_sp_CCH10-C7	15	[12.1 - 18.5%]	0.8781	0	21.4	[19.2 - 23.9%]	0.2048	0	15.2	[12.7 - 18.1%]	0.9031	0	3.22
Bradyrhizobium huanghuaihaiense CGMCC 1.10948	Bradyrhizobium_sp_Cp5_3	39.9	[36.5 - 43.3%]	0.3937	1.64	31.8	[29.4 - 34.3%]	0.1329	0.21	37.2	[34.2 - 40.2%]	0.4742	0.05	0.53
Bradyrhizobium huanghuaihaiense CGMCC 1.10948	Bradyrhizobium_sp_DFCI-1	23.5	[20.2 - 27.2%]	0.6279	0.01	24.2	[21.9 - 26.7%]	0.1804	0.01	22.5	[19.7 - 25.6%]	0.695	0	0.51
Bradyrhizobium huanghuaihaiense CGMCC 1.10948	Bradyrhizobium_sp_DOA1	43.7	[40.3 - 47.1%]	0.3578	3.87	34.6	[32.2 - 37.1%]	0.1198	0.58	41	[38 - 44%]	0.4347	0.19	0.13
Bradyrhizobium huanghuaihaiense CGMCC 1.10948	Bradyrhizobium_sp_DOA9	46	[42.7 - 49.5%]	0.3379	6.16	36	[33.5 - 38.5%]	0.1142	0.89	43.3	[40.3 - 46.3%]	0.4135	0.41	0.55
Bradyrhizobium huanghuaihaiense CGMCC 1.10948	Bradyrhizobium_sp_Ec3_3	32.7	[29.3 - 36.2%]	0.4757	0.22	28.7	[26.3 - 31.2%]	0.1497	0.06	30.7	[27.8 - 33.8%]	0.5542	0	1.3
Bradyrhizobium huanghuaihaiense CGMCC 1.10948	Bradyrhizobium_sp_G22	45.1	[41.7 - 48.5%]	0.3458	5.12	36.1	[33.6 - 38.6%]	0.1137	0.92	42.5	[39.6 - 45.6%]	0.4203	0.32	0.21
Bradyrhizobium huanghuaihaiense CGMCC 1.10948	Bradyrhizobium_sp_Leaf396	36.5	[33.1 - 40%]	0.4293	0.69	33.3	[30.8 - 35.8%]	0.1258	0.37	34.8	[31.9 - 37.9%]	0.5012	0.02	0.15
Bradyrhizobium huanghuaihaiense CGMCC 1.10948	Bradyrhizobium_sp_LMTR_3	22.2	[19 - 25.9%]	0.6564	0	23	[20.8 - 25.5%]	0.19	0	21.3	[18.6 - 24.4%]	0.7217	0	1.67
Bradyrhizobium huanghuaihaiense CGMCC 1.10948	Bradyrhizobium_sp_LTSP849	40.7	[37.4 - 44.2%]	0.3854	2	33.3	[30.9 - 35.8%]	0.1256	0.37	38.3	[35.3 - 41.3%]	0.4626	0.07	0.7
Bradyrhizobium huanghuaihaiense CGMCC 1.10948	Bradyrhizobium_sp_LTSP857	42	[38.7 - 45.5%]	0.373	2.69	33.2	[30.8 - 35.8%]	0.1259	0.37	39.3	[36.3 - 42.3%]	0.452	0.11	0.65
Bradyrhizobium huanghuaihaiense CGMCC 1.10948	Bradyrhizobium_sp_LTSP885	23.9	[20.6 - 27.6%]	0.6188	0.01	23.6	[21.3 - 26.1%]	0.185	0	22.8	[20 - 25.9%]	0.6893	0	0.55
Bradyrhizobium huanghuaihaiense CGMCC 1.10948	Bradyrhizobium_sp_LTSPM299	23.1	[19.8 - 26.7%]	0.6371	0	23.5	[21.2 - 26%]	0.1858	0	22.1	[19.3 - 25.2%]	0.7045	0	1.12
Bradyrhizobium huanghuaihaiense CGMCC 1.10948	Bradyrhizobium_sp_OHSU_III	23.5	[20.2 - 27.1%]	0.6289	0.01	24	[21.7 - 26.5%]	0.1819	0	22.5	[19.7 - 25.6%]	0.6964	0	0.77
Bradyrhizobium huanghuaihaiense CGMCC 1.10948	Bradyrhizobium_sp_ORS_278	21.3	[18.1 - 24.9%]	0.678	0	23.2	[20.9 - 25.6%]	0.1888	0	20.6	[17.9 - 23.7%]	0.7388	0	1.57
Bradyrhizobium huanghuaihaiense CGMCC 1.10948	Bradyrhizobium_sp_ORS_285	21.3	[18.1 - 25%]	0.6776	0	23.2	[20.9 - 25.7%]	0.1886	0	20.6	[17.9 - 23.7%]	0.7384	0	1.29
Bradyrhizobium huanghuaihaiense CGMCC 1.10948	Bradyrhizobium_sp_ORS_375	21.3	[18.1 - 24.9%]	0.6779	0	23.5	[21.2 - 26%]	0.1861	0	20.7	[17.9 - 23.7%]	0.7378	0	1.56
Bradyrhizobium huanghuaihaiense CGMCC 1.10948	Bradyrhizobium_sp_S23321	45.9	[42.5 - 49.3%]	0.339	6	34.8	[32.3 - 37.3%]	0.1191	0.61	42.8	[39.8 - 45.8%]	0.4177	0.35	0.36
Bradyrhizobium huanghuaihaiense CGMCC 1.10948	Bradyrhizobium_sp_STM_3809	21.8	[18.5 - 25.4%]	0.6669	0	23.6	[21.3 - 26.1%]	0.1851	0	21	[18.3 - 24.1%]	0.7286	0	2.25
Bradyrhizobium huanghuaihaiense CGMCC 1.10948	Bradyrhizobium_sp_STM_3843	20.4	[17.2 - 24%]	0.702	0	22.9	[20.7 - 25.4%]	0.1908	0	19.8	[17.1 - 22.9%]	0.7589	0	0.34
Bradyrhizobium huanghuaihaiense CGMCC 1.10948	Bradyrhizobium_sp_th_b2	23.3	[20 - 27%]	0.6317	0	24.4	[22.1 - 26.8%]	0.179	0.01	22.4	[19.6 - 25.5%]	0.6976	0	0.67
Bradyrhizobium huanghuaihaiense CGMCC 1.10948	Bradyrhizobium_sp_Tv2a-2	21.2	[18 - 24.8%]	0.6808	0	22.7	[20.4 - 25.2%]	0.1927	0	20.5	[17.7 - 23.5%]	0.7423	0	1.74
Bradyrhizobium huanghuaihaiense CGMCC 1.10948	Bradyrhizobium_sp_URHA0002	21.3	[18.1 - 25%]	0.6772	0	22.8	[20.5 - 25.2%]	0.1923	0	20.6	[17.8 - 23.7%]	0.7392	0	1.74
Bradyrhizobium huanghuaihaiense CGMCC 1.10948	Bradyrhizobium_sp_URHA0013	46.5	[43.1 - 49.9%]	0.334	6.72	33.9	[31.5 - 36.4%]	0.1228	0.46	43	[40 - 46.1%]	0.4158	0.37	0.17
Bradyrhizobium huanghuaihaiense CGMCC 1.10948	Bradyrhizobium_sp_URHD0069	17.7	[14.6 - 21.2%]	0.7798	0	22.1	[19.8 - 24.5%]	0.1984	0	17.5	[14.9 - 20.5%]	0.8235	0	3.26
Bradyrhizobium huanghuaihaiense CGMCC 1.10948	Bradyrhizobium_sp_USDA_3384	48.2	[44.8 - 51.6%]	0.3209	9.05	36.9	[34.5 - 39.4%]	0.1104	1.18	45.3	[42.3 - 48.3%]	0.3959	0.75	0.37
Bradyrhizobium huanghuaihaiense CGMCC 1.10948	Bradyrhizobium_sp_WSM471	43.3	[39.9 - 46.8%]	0.3613	3.56	34	[31.6 - 36.5%]	0.1225	0.47	40.5	[37.6 - 43.6%]	0.4395	0.16	0.53
Bradyrhizobium huanghuaihaiense CGMCC 1.10948	Bradyrhizobium_sp_WSM1253	42.8	[39.4 - 46.2%]	0.366	3.18	33.6	[31.2 - 36.2%]	0.1241	0.42	40	[37 - 43%]	0.4447	0.14	0.79
Bradyrhizobium huanghuaihaiense CGMCC 1.10948	Bradyrhizobium_sp_WSM1417	42.8	[39.5 - 46.3%]	0.3655	3.22	33.9	[31.5 - 36.4%]	0.123	0.46	40.1	[37.2 - 43.2%]	0.4435	0.14	0.77
Bradyrhizobium huanghuaihaiense CGMCC 1.10948	Bradyrhizobium_sp_WSM1743	45.9	[42.5 - 49.3%]	0.3392	5.97	37.3	[34.8 - 39.8%]	0.109	1.32	43.5	[40.5 - 46.6%]	0.4113	0.44	0.56
Bradyrhizobium huanghuaihaiense CGMCC 1.10948	Bradyrhizobium_sp_WSM2254	47.6	[44.2 - 51%]	0.3256	8.15	38.4	[35.9 - 40.9%]	0.105	1.78	45.2	[42.2 - 48.2%]	0.3964	0.74	0.05
Bradyrhizobium huanghuaihaiense CGMCC 1.10948	Bradyrhizobium_sp_WSM2793	47.5	[44.1 - 51%]	0.3257	8.11	35.3	[32.9 - 37.8%]	0.1168	0.73	44.3	[41.3 - 47.3%]	0.4045	0.56	0.41
Bradyrhizobium huanghuaihaiense CGMCC 1.10948	Bradyrhizobium_sp_WSM3983	38.9	[35.6 - 42.4%]	0.4034	1.3	33.2	[30.8 - 35.7%]	0.1262	0.36	36.8	[33.8 - 39.8%]	0.4787	0.04	0.97
Bradyrhizobium huanghuaihaiense CGMCC 1.10948	Bradyrhizobium_sp_WSM4349	42	[38.6 - 45.4%]	0.3733	2.67	33.6	[31.2 - 36.1%]	0.1242	0.41	39.4	[36.4 - 42.4%]	0.4512	0.11	0.8
Bradyrhizobium huanghuaihaiense CGMCC 1.10948	Bradyrhizobium_sp_YR681	49.2	[45.8 - 52.7%]	0.3127	10.85	37.1	[34.7 - 39.6%]	0.1098	1.25	46.2	[43.2 - 49.2%]	0.3881	0.98	0.78
Bradyrhizobium huanghuaihaiense CGMCC 1.10948	Bradyrhizobium_stylosanthis_BR_446	54.3	[50.8 - 57.8%]	0.2764	22.85	40.1	[37.7 - 42.7%]	0.0989	2.82	51.2	[48.2 - 54.3%]	0.348	3.88	0.62
Bradyrhizobium huanghuaihaiense CGMCC 1.10948	Bradyrhizobium_tropiciagri_SEMIA_6148	23.1	[19.8 - 26.8%]	0.636	0	24.2	[21.9 - 26.7%]	0.1803	0.01	22.2	[19.4 - 25.3%]	0.7017	0	0.44
Bradyrhizobium huanghuaihaiense CGMCC 1.10948	Bradyrhizobium_valentinum_LmjM3	20.9	[17.7 - 24.6%]	0.6873	0	23.1	[20.8 - 25.6%]	0.1891	0	20.3	[17.6 - 23.4%]	0.7465	0	2.02
Bradyrhizobium huanghuaihaiense CGMCC 1.10948	Bradyrhizobium_valentinum_LmjM6	21	[17.8 - 24.6%]	0.6855	0	23	[20.7 - 25.4%]	0.1905	0	20.3	[17.6 - 23.4%]	0.7454	0	2.06
Bradyrhizobium huanghuaihaiense CGMCC 1.10948	Bradyrhizobium_viridifuturi_SEMIA_690	24.1	[20.8 - 27.7%]	0.6158	0.01	24.1	[21.8 - 26.6%]	0.1811	0.01	23	[20.2 - 26.1%]	0.6854	0	0.09
Bradyrhizobium huanghuaihaiense CGMCC 1.10948	Bradyrhizobium_yuanmingense_BR3267	46.2	[42.8 - 49.6%]	0.3369	6.3	35.4	[33 - 37.9%]	0.1165	0.75	43.2	[40.2 - 46.2%]	0.4141	0.4	0.07
Bradyrhizobium huanghuaihaiense CGMCC 1.10948	Bradyrhizobium_yuanmingense_CCBAU_05623	47.6	[44.2 - 51.1%]	0.3249	8.27	36.6	[34.1 - 39.1%]	0.1117	1.08	44.8	[41.8 - 47.8%]	0.4003	0.64	0.15
Bradyrhizobium huanghuaihaiense CGMCC 1.10948	Bradyrhizobium_yuanmingense_CCBAU_25021	46.4	[43 - 49.8%]	0.3348	6.6	35.6	[33.1 - 38.1%]	0.1158	0.79	43.5	[40.5 - 46.5%]	0.4118	0.43	0.13
Bradyrhizobium huanghuaihaiense CGMCC 1.10948	Bradyrhizobium_yuanmingense_CCBAU_35157	46.8	[43.4 - 50.2%]	0.332	7.04	35.5	[33.1 - 38.1%]	0.1159	0.78	43.7	[40.7 - 46.8%]	0.4094	0.47	0
Bradyrhizobium lablabi GAS522	Bradyrhizobium ottawaense GAS524	99.5	[99 - 99.7%]	0.0125	99.48	100	[99.9 - 100%]	0.0001	98.29	99.8	[99.6 - 99.9%]	0.0126	99.98	0.03
Bradyrhizobium lablabi GAS522	Bradyrhizobium sp. CF659	22.3	[19.1 - 26%]	0.6541	0	23.4	[21.1 - 25.8%]	0.1873	0	21.5	[18.7 - 24.5%]	0.7189	0	2.18
Bradyrhizobium lablabi GAS522	Bradyrhizobium sp. ERR11	21.1	[17.9 - 24.7%]	0.6832	0	23.1	[20.8 - 25.5%]	0.1898	0	20.4	[17.7 - 23.5%]	0.7434	0	0.89
Bradyrhizobium lablabi GAS522	Bradyrhizobium sp. Gha	20.4	[17.2 - 24%]	0.7012	0	22.7	[20.4 - 25.2%]	0.1928	0	19.8	[17.1 - 22.9%]	0.7588	0	0.53
Bradyrhizobium lablabi GAS522	Bradyrhizobium sp. Ghvi	20.8	[17.6 - 24.4%]	0.6912	0	22.7	[20.4 - 25.1%]	0.1933	0	20.1	[17.4 - 23.2%]	0.7509	0	0.69
Bradyrhizobium lablabi GAS522	Bradyrhizobium sp. OK095	22.3	[19.1 - 26%]	0.6537	0	22.6	[20.4 - 25.1%]	0.1935	0	21.4	[18.6 - 24.5%]	0.7207	0	1.55
Bradyrhizobium lablabi GAS522	Bradyrhizobium sp. R5	24	[20.7 - 27.6%]	0.6177	0.01	25	[22.6 - 27.4%]	0.1745	0.01	23	[20.2 - 26.1%]	0.6844	0	1.31
Bradyrhizobium lablabi GAS522	Bradyrhizobium sp. Rc2d	20.7	[17.5 - 24.3%]	0.6943	0	23.1	[20.8 - 25.6%]	0.1895	0	20.1	[17.3 - 23.1%]	0.7522	0	0.49
Bradyrhizobium lablabi GAS522	Bradyrhizobium sp. Rc3b	21.6	[18.4 - 25.3%]	0.6703	0	23.2	[20.9 - 25.6%]	0.1888	0	20.9	[18.1 - 23.9%]	0.7325	0	1.34
Bradyrhizobium lablabi GAS522	Bradyrhizobium yuanmingense CCBAU 10071	21.2	[18 - 24.9%]	0.6796	0	22.9	[20.6 - 25.4%]	0.1909	0	20.5	[17.8 - 23.6%]	0.7408	0	1.43
Bradyrhizobium lablabi GAS522	Bradyrhizobium yuanmingense CGMCC 1.3531	21.2	[18 - 24.8%]	0.6803	0	22.9	[20.6 - 25.4%]	0.191	0	20.5	[17.8 - 23.6%]	0.7414	0	1.43
Bradyrhizobium lablabi GAS522	Mesorhizobium_ciceri_WSM1271_OUTGROUP	13.1	[10.4 - 16.4%]	0.9687	0	18.4	[16.2 - 20.8%]	0.2389	0	13.4	[11 - 16.2%]	0.9762	0	0.22
Bradyrhizobium lablabi GAS522	Bradyrhizobium_diazoefficiens_SEMIA_5080	21.6	[18.4 - 25.3%]	0.6701	0	23.3	[21 - 25.8%]	0.1874	0	20.9	[18.1 - 24%]	0.7319	0	1.64
Bradyrhizobium lablabi GAS522	Bradyrhizobium_diazoefficiens_USDA_110	21.7	[18.5 - 25.4%]	0.668	0	23.3	[21 - 25.8%]	0.1876	0	21	[18.2 - 24%]	0.7303	0	1.72
Bradyrhizobium lablabi GAS522	Bradyrhizobium_elkanii_587	21.7	[18.5 - 25.3%]	0.6686	0	25.6	[23.3 - 28.1%]	0.1694	0.01	21.2	[18.4 - 24.3%]	0.7247	0	1.3
Bradyrhizobium lablabi GAS522	Bradyrhizobium_elkanii_BLY3-8	24.3	[21 - 27.9%]	0.6122	0.01	25	[22.7 - 27.5%]	0.1743	0.01	23.3	[20.4 - 26.4%]	0.6798	0	1.47
Bradyrhizobium lablabi GAS522	Bradyrhizobium_elkanii_BLY6-1	24.3	[21 - 27.9%]	0.6119	0.01	25	[22.7 - 27.5%]	0.1743	0.01	23.3	[20.4 - 26.4%]	0.6796	0	1.47
Bradyrhizobium lablabi GAS522	Bradyrhizobium_elkanii_CCBAU_05737	23.3	[20 - 26.9%]	0.6333	0	25.2	[22.9 - 27.7%]	0.1724	0.01	22.5	[19.7 - 25.6%]	0.6965	0	1.17
Bradyrhizobium lablabi GAS522	Bradyrhizobium_elkanii_CCBAU_43297	23.7	[20.4 - 27.4%]	0.6232	0.01	25.2	[22.9 - 27.7%]	0.1725	0.01	22.9	[20 - 25.9%]	0.6882	0	1.41
Bradyrhizobium lablabi GAS522	Bradyrhizobium_elkanii_UASWS1015	24.8	[21.5 - 28.4%]	0.6016	0.01	24.6	[22.3 - 27.1%]	0.1773	0.01	23.6	[20.8 - 26.7%]	0.6722	0	2.3
Bradyrhizobium lablabi GAS522	Bradyrhizobium_elkanii_USDA_76	24.2	[20.9 - 27.8%]	0.6139	0.01	25.1	[22.7 - 27.5%]	0.1738	0.01	23.2	[20.4 - 26.3%]	0.681	0	1.38
Bradyrhizobium lablabi GAS522	Bradyrhizobium_elkanii_USDA_94	24	[20.7 - 27.7%]	0.6171	0.01	25	[22.7 - 27.5%]	0.1741	0.01	23.1	[20.2 - 26.2%]	0.6838	0	1.41
Bradyrhizobium lablabi GAS522	Bradyrhizobium_elkanii_USDA_3254	24.5	[21.2 - 28.1%]	0.608	0.01	24.9	[22.5 - 27.3%]	0.1752	0.01	23.4	[20.6 - 26.5%]	0.6767	0	1.44
Bradyrhizobium lablabi GAS522	Bradyrhizobium_elkanii_USDA_3259	24.7	[21.4 - 28.4%]	0.6029	0.01	24.8	[22.5 - 27.3%]	0.1753	0.01	23.6	[20.8 - 26.7%]	0.6725	0	1.57
Bradyrhizobium lablabi GAS522	Bradyrhizobium_elkanii_WSM1741	27.6	[24.3 - 31.3%]	0.5505	0.04	27	[24.7 - 29.5%]	0.1598	0.03	26.3	[23.4 - 29.4%]	0.6224	0	0.24
Bradyrhizobium lablabi GAS522	Bradyrhizobium_elkanii_WSM2783	21.7	[18.5 - 25.4%]	0.6676	0	24.8	[22.5 - 27.3%]	0.1757	0.01	21.2	[18.4 - 24.2%]	0.726	0	0.01
Bradyrhizobium lablabi GAS522	Bradyrhizobium_embrapense_SEMIA_6208	24.8	[21.5 - 28.5%]	0.6012	0.01	24.6	[22.3 - 27.1%]	0.1768	0.01	23.7	[20.8 - 26.8%]	0.6717	0	1.64
Bradyrhizobium lablabi GAS522	Bradyrhizobium_icense_LMTR_13	27.1	[23.8 - 30.7%]	0.5592	0.03	27.2	[24.8 - 29.7%]	0.1589	0.03	25.9	[23 - 29%]	0.6292	0	0.31
Bradyrhizobium lablabi GAS522	Bradyrhizobium_japonicum_22	22.2	[18.9 - 25.8%]	0.6577	0	22.9	[20.6 - 25.3%]	0.1913	0	21.3	[18.5 - 24.3%]	0.7232	0	2.19
Bradyrhizobium lablabi GAS522	Bradyrhizobium_japonicum_CCBA_15517	20.7	[17.5 - 24.3%]	0.6927	0	23.4	[21.1 - 25.8%]	0.1871	0	20.2	[17.4 - 23.2%]	0.7502	0	1.06
Bradyrhizobium lablabi GAS522	Bradyrhizobium_japonicum_CCBAU_15354	20.7	[17.5 - 24.3%]	0.6934	0	23.4	[21.1 - 25.9%]	0.1865	0	20.1	[17.4 - 23.2%]	0.7506	0	0.99
Bradyrhizobium lablabi GAS522	Bradyrhizobium_japonicum_CCBAU_15618	21	[17.8 - 24.6%]	0.6857	0	23.2	[20.9 - 25.7%]	0.1886	0	20.4	[17.6 - 23.4%]	0.7449	0	1.08
Bradyrhizobium lablabi GAS522	Bradyrhizobium_japonicum_CCBAU_25435	21.4	[18.2 - 25%]	0.6761	0	23.2	[20.9 - 25.6%]	0.189	0	20.7	[17.9 - 23.7%]	0.7373	0	1.14
Bradyrhizobium lablabi GAS522	Bradyrhizobium_japonicum_CCBAU_83623	20.6	[17.4 - 24.2%]	0.6971	0	23.4	[21.1 - 25.9%]	0.1865	0	20	[17.3 - 23.1%]	0.7536	0	0.97
Bradyrhizobium lablabi GAS522	Bradyrhizobium_japonicum_E109	22	[18.7 - 25.6%]	0.6618	0	23	[20.7 - 25.5%]	0.19	0	21.2	[18.4 - 24.2%]	0.726	0	1.32
Bradyrhizobium lablabi GAS522	Bradyrhizobium_japonicum_FN1	22	[18.7 - 25.6%]	0.6618	0	23	[20.7 - 25.5%]	0.1902	0	21.1	[18.4 - 24.2%]	0.7262	0	1.35
Bradyrhizobium lablabi GAS522	Bradyrhizobium_japonicum_in8p8	20.6	[17.4 - 24.2%]	0.6954	0	22.7	[20.5 - 25.2%]	0.1926	0	20	[17.3 - 23%]	0.7541	0	1.45
Bradyrhizobium lablabi GAS522	Bradyrhizobium_japonicum_Is-1	21.7	[18.4 - 25.3%]	0.6693	0	23.3	[21 - 25.8%]	0.1876	0	20.9	[18.2 - 24%]	0.7313	0	1.65
Bradyrhizobium lablabi GAS522	Bradyrhizobium_japonicum_is5	20.6	[17.4 - 24.2%]	0.6951	0	22.7	[20.5 - 25.2%]	0.1926	0	20	[17.3 - 23.1%]	0.7538	0	1.45
Bradyrhizobium lablabi GAS522	Bradyrhizobium_japonicum_Is-34	21	[17.8 - 24.6%]	0.6854	0	23.1	[20.8 - 25.6%]	0.1895	0	20.4	[17.6 - 23.4%]	0.745	0	0.71
Bradyrhizobium lablabi GAS522	Bradyrhizobium_japonicum_SEMIA_5079	21.7	[18.4 - 25.3%]	0.6691	0	23	[20.7 - 25.5%]	0.1902	0	20.9	[18.1 - 24%]	0.7321	0	1.21
Bradyrhizobium lablabi GAS522	Bradyrhizobium_japonicum_USDA_4	21.6	[18.4 - 25.2%]	0.6708	0	23.1	[20.8 - 25.6%]	0.1894	0	20.8	[18.1 - 23.9%]	0.7332	0	1.34
Bradyrhizobium lablabi GAS522	Bradyrhizobium_japonicum_USDA_6	21.9	[18.6 - 25.5%]	0.6639	0	23.1	[20.8 - 25.5%]	0.1896	0	21.1	[18.3 - 24.1%]	0.7277	0	1.33
Bradyrhizobium lablabi GAS522	Bradyrhizobium_japonicum_USDA_38	21.3	[18.1 - 25%]	0.6774	0	23.1	[20.8 - 25.5%]	0.1895	0	20.6	[17.9 - 23.7%]	0.7386	0	1.2
Bradyrhizobium lablabi GAS522	Bradyrhizobium_japonicum_USDA_122	21.6	[18.4 - 25.3%]	0.6702	0	23.3	[21 - 25.8%]	0.1878	0	20.9	[18.1 - 24%]	0.7321	0	1.66
Bradyrhizobium lablabi GAS522	Bradyrhizobium_japonicum_USDA_123	21	[17.7 - 24.6%]	0.6867	0	23.3	[21 - 25.7%]	0.1881	0	20.3	[17.6 - 23.4%]	0.7456	0	0.94
Bradyrhizobium lablabi GAS522	Bradyrhizobium_japonicum_USDA_124	21.8	[18.6 - 25.5%]	0.6651	0	23.1	[20.8 - 25.5%]	0.1895	0	21	[18.3 - 24.1%]	0.7286	0	1.71
Bradyrhizobium lablabi GAS522	Bradyrhizobium_japonicum_USDA_135	21.1	[17.8 - 24.7%]	0.684	0	23.2	[20.9 - 25.6%]	0.1888	0	20.4	[17.7 - 23.5%]	0.7437	0	1.62
Bradyrhizobium lablabi GAS522	Bradyrhizobium_jicamae_PAC68	27.6	[24.2 - 31.2%]	0.5517	0.03	27.3	[24.9 - 29.8%]	0.1581	0.03	26.3	[23.4 - 29.4%]	0.6226	0	0.06
Bradyrhizobium lablabi GAS522	Bradyrhizobium_liaoningense_CCBAU_05525	20.3	[17.1 - 23.9%]	0.7042	0	23.3	[21 - 25.8%]	0.1874	0	19.8	[17.1 - 22.8%]	0.7596	0	1.46
Bradyrhizobium lablabi GAS522	Bradyrhizobium_liaoningense_CCBAU_83689	20.3	[17.2 - 24%]	0.7023	0	23.3	[21 - 25.8%]	0.1874	0	19.8	[17.1 - 22.9%]	0.7581	0	1.5
Bradyrhizobium lablabi GAS522	Bradyrhizobium_liaoningense_CCNWSX0360	20.7	[17.5 - 24.3%]	0.6928	0	23.1	[20.8 - 25.5%]	0.1896	0	20.1	[17.4 - 23.2%]	0.751	0	1.37
Bradyrhizobium lablabi GAS522	Rhizobium_lupini_HPC_L_OUTGROUP	12.7	[10 - 16%]	0.9885	0	18.3	[16.1 - 20.6%]	0.2407	0	13.1	[10.7 - 15.8%]	0.9913	0	3.12
Bradyrhizobium lablabi GAS522	Bradyrhizobium_manausense_BR3351	20.2	[17 - 23.8%]	0.7068	0	22.9	[20.7 - 25.4%]	0.1908	0	19.7	[16.9 - 22.7%]	0.7628	0	0.53
Bradyrhizobium lablabi GAS522	Bradyrhizobium_neotropicale_BR_10247	22	[18.7 - 25.6%]	0.6618	0	23.3	[21 - 25.8%]	0.1875	0	21.2	[18.4 - 24.3%]	0.7252	0	1.26
Bradyrhizobium lablabi GAS522	Bradyrhizobium_oligotrophicum_S58	19	[15.9 - 22.6%]	0.7387	0	22.6	[20.3 - 25%]	0.1939	0	18.7	[16 - 21.7%]	0.7893	0	2.79
Bradyrhizobium lablabi GAS522	Bradyrhizobium_pachyrhizi_BR3262	24.4	[21.1 - 28.1%]	0.6085	0.01	24.9	[22.6 - 27.4%]	0.1746	0.01	23.4	[20.6 - 26.5%]	0.6768	0	1.42
Bradyrhizobium lablabi GAS522	Bradyrhizobium_pachyrhizi_PAC_48	24.6	[21.3 - 28.2%]	0.6061	0.01	24.9	[22.6 - 27.4%]	0.175	0.01	23.5	[20.7 - 26.6%]	0.675	0	1.42
Bradyrhizobium lablabi GAS522	Bradyrhizobium_paxllaeri_LMTR_21	28.9	[25.5 - 32.5%]	0.5296	0.06	27.2	[24.8 - 29.7%]	0.1588	0.03	27.4	[24.5 - 30.5%]	0.6043	0	0.15
Bradyrhizobium lablabi GAS522	Bradyrhizobium_retamae_Ro19	26.8	[23.4 - 30.4%]	0.5651	0.02	26.9	[24.6 - 29.4%]	0.1605	0.03	25.6	[22.7 - 28.7%]	0.6349	0	0.47
Bradyrhizobium lablabi GAS522	Bradyrhizobium_sp_17-4	21.2	[18 - 24.9%]	0.6801	0	26	[23.7 - 28.5%]	0.1668	0.02	20.8	[18.1 - 23.9%]	0.7334	0	1.54
Bradyrhizobium lablabi GAS522	Bradyrhizobium_sp_Ai1a-2	22.5	[19.2 - 26.1%]	0.6499	0	24.5	[22.2 - 27%]	0.178	0.01	21.8	[19 - 24.8%]	0.7123	0	0.24
Bradyrhizobium lablabi GAS522	Bradyrhizobium_sp_ARR65	18.8	[15.7 - 22.4%]	0.7456	0	22.5	[20.2 - 24.9%]	0.1948	0	18.5	[15.8 - 21.5%]	0.7952	0	0.33
Bradyrhizobium lablabi GAS522	Bradyrhizobium_sp_AT1	22	[18.7 - 25.6%]	0.6615	0	23.2	[20.9 - 25.6%]	0.189	0	21.2	[18.4 - 24.2%]	0.7254	0	2.22
Bradyrhizobium lablabi GAS522	Bradyrhizobium_sp_BF49	21.7	[18.5 - 25.3%]	0.6686	0	22.9	[20.7 - 25.4%]	0.1908	0	20.9	[18.1 - 24%]	0.7318	0	1.43
Bradyrhizobium lablabi GAS522	Bradyrhizobium_sp_BR_10245	20.8	[17.6 - 24.4%]	0.6917	0	23.3	[21 - 25.8%]	0.1877	0	20.2	[17.4 - 23.2%]	0.7496	0	0.88
Bradyrhizobium lablabi GAS522	Bradyrhizobium_sp_BR_10303	23.6	[20.3 - 27.3%]	0.6252	0.01	24.6	[22.3 - 27.1%]	0.1772	0.01	22.7	[19.9 - 25.8%]	0.6916	0	0.91
Bradyrhizobium lablabi GAS522	Bradyrhizobium_sp_CCBAU_15544	21.2	[18 - 24.9%]	0.68	0	23.3	[21 - 25.7%]	0.1879	0	20.6	[17.8 - 23.6%]	0.7401	0	1.4
Bradyrhizobium lablabi GAS522	Bradyrhizobium_sp_CCBAU_15615	21.2	[18 - 24.9%]	0.68	0	23.2	[20.9 - 25.7%]	0.1885	0	20.6	[17.8 - 23.6%]	0.7403	0	1.33
Bradyrhizobium lablabi GAS522	Bradyrhizobium_sp_CCBAU_15635	21.6	[18.3 - 25.2%]	0.6713	0	23.2	[20.9 - 25.7%]	0.1883	0	20.8	[18.1 - 23.9%]	0.7332	0	1.47
Bradyrhizobium lablabi GAS522	Bradyrhizobium_sp_CCBAU_41267	21.3	[18.1 - 24.9%]	0.6778	0	23.5	[21.2 - 25.9%]	0.1864	0	20.7	[17.9 - 23.7%]	0.7379	0	1.66
Bradyrhizobium lablabi GAS522	Bradyrhizobium_sp_CCBAU_43298	20.9	[17.7 - 24.5%]	0.6888	0	23.2	[20.9 - 25.7%]	0.1883	0	20.3	[17.5 - 23.3%]	0.7474	0	1.54
Bradyrhizobium lablabi GAS522	Bradyrhizobium_sp_CCGE-LA001	21.9	[18.6 - 25.5%]	0.6649	0	22.8	[20.5 - 25.3%]	0.1919	0	21	[18.2 - 24.1%]	0.7292	0	1.23
Bradyrhizobium lablabi GAS522	Bradyrhizobium_sp_CCH4-A6	15.8	[12.9 - 19.3%]	0.8464	0	21.6	[19.4 - 24%]	0.2031	0	15.9	[13.3 - 18.8%]	0.8776	0	1.44
Bradyrhizobium lablabi GAS522	Bradyrhizobium_sp_CCH5-F6	20.6	[17.4 - 24.2%]	0.6967	0	23.1	[20.9 - 25.6%]	0.189	0	20	[17.3 - 23.1%]	0.754	0	1.78
Bradyrhizobium lablabi GAS522	Bradyrhizobium_sp_CCH10-C7	15.8	[12.8 - 19.2%]	0.8485	0	21.6	[19.4 - 24%]	0.2031	0	15.8	[13.3 - 18.7%]	0.8793	0	1.62
Bradyrhizobium lablabi GAS522	Bradyrhizobium_sp_Cp5_3	21.6	[18.4 - 25.2%]	0.671	0	23.1	[20.8 - 25.5%]	0.1896	0	20.8	[18.1 - 23.9%]	0.7334	0	1.07
Bradyrhizobium lablabi GAS522	Bradyrhizobium_sp_DFCI-1	25.2	[21.9 - 28.9%]	0.5932	0.01	24.6	[22.3 - 27.1%]	0.1771	0.01	24	[21.1 - 27.1%]	0.6652	0	2.11
Bradyrhizobium lablabi GAS522	Bradyrhizobium_sp_DOA1	21.6	[18.3 - 25.2%]	0.672	0	22.9	[20.6 - 25.4%]	0.191	0	20.8	[18 - 23.8%]	0.7347	0	1.47
Bradyrhizobium lablabi GAS522	Bradyrhizobium_sp_DOA9	22.1	[18.9 - 25.7%]	0.6588	0	23	[20.7 - 25.4%]	0.1905	0	21.2	[18.5 - 24.3%]	0.7238	0	2.15
Bradyrhizobium lablabi GAS522	Bradyrhizobium_sp_Ec3_3	20.1	[16.9 - 23.7%]	0.7086	0	23.1	[20.9 - 25.6%]	0.189	0	19.6	[16.9 - 22.7%]	0.7636	0	0.3
Bradyrhizobium lablabi GAS522	Bradyrhizobium_sp_G22	22	[18.8 - 25.7%]	0.6605	0	23.1	[20.8 - 25.5%]	0.1897	0	21.2	[18.4 - 24.3%]	0.7249	0	1.39
Bradyrhizobium lablabi GAS522	Bradyrhizobium_sp_Leaf396	20.3	[17.1 - 23.9%]	0.7034	0	22.7	[20.4 - 25.2%]	0.1929	0	19.7	[17 - 22.8%]	0.7606	0	1.45
Bradyrhizobium lablabi GAS522	Bradyrhizobium_sp_LMTR_3	28	[24.7 - 31.7%]	0.5439	0.04	27.2	[24.9 - 29.7%]	0.1586	0.03	26.7	[23.8 - 29.8%]	0.6163	0	0.07
Bradyrhizobium lablabi GAS522	Bradyrhizobium_sp_LTSP849	21.9	[18.7 - 25.6%]	0.6631	0	22.9	[20.7 - 25.4%]	0.1909	0	21.1	[18.3 - 24.2%]	0.7274	0	0.9
Bradyrhizobium lablabi GAS522	Bradyrhizobium_sp_LTSP857	21.9	[18.7 - 25.6%]	0.6632	0	22.9	[20.6 - 25.4%]	0.191	0	21.1	[18.3 - 24.2%]	0.7275	0	0.95
Bradyrhizobium lablabi GAS522	Bradyrhizobium_sp_LTSP885	25.5	[22.1 - 29.1%]	0.5889	0.01	25	[22.6 - 27.4%]	0.1745	0.01	24.2	[21.4 - 27.3%]	0.6606	0	1.05
Bradyrhizobium lablabi GAS522	Bradyrhizobium_sp_LTSPM299	24.9	[21.6 - 28.5%]	0.5997	0.01	25.4	[23.1 - 27.9%]	0.171	0.01	23.8	[21 - 26.9%]	0.6681	0	0.48
Bradyrhizobium lablabi GAS522	Bradyrhizobium_sp_OHSU_III	25.1	[21.7 - 28.7%]	0.5966	0.01	24.6	[22.3 - 27.1%]	0.1772	0.01	23.8	[21 - 26.9%]	0.668	0	2.37
Bradyrhizobium lablabi GAS522	Bradyrhizobium_sp_ORS_278	19	[15.9 - 22.6%]	0.7391	0	22.6	[20.3 - 25.1%]	0.1938	0	18.7	[16 - 21.7%]	0.7897	0	3.17
Bradyrhizobium lablabi GAS522	Bradyrhizobium_sp_ORS_285	19	[15.8 - 22.5%]	0.7411	0	22.5	[20.3 - 25%]	0.1945	0	18.6	[15.9 - 21.6%]	0.7915	0	2.89
Bradyrhizobium lablabi GAS522	Bradyrhizobium_sp_ORS_375	18.9	[15.8 - 22.5%]	0.7418	0	22.8	[20.5 - 25.2%]	0.1925	0	18.6	[15.9 - 21.6%]	0.7915	0	3.16
Bradyrhizobium lablabi GAS522	Bradyrhizobium_sp_S23321	22.7	[19.5 - 26.4%]	0.6443	0	22.9	[20.6 - 25.4%]	0.191	0	21.8	[19 - 24.8%]	0.7123	0	1.96
Bradyrhizobium lablabi GAS522	Bradyrhizobium_sp_STM_3809	19.2	[16.1 - 22.8%]	0.7325	0	23	[20.7 - 25.5%]	0.1902	0	18.9	[16.2 - 21.9%]	0.7834	0	3.85
Bradyrhizobium lablabi GAS522	Bradyrhizobium_sp_STM_3843	18.2	[15.1 - 21.7%]	0.7646	0	22.7	[20.4 - 25.1%]	0.1932	0	18	[15.3 - 20.9%]	0.8101	0	1.26
Bradyrhizobium lablabi GAS522	Bradyrhizobium_sp_th_b2	23.7	[20.4 - 27.4%]	0.6235	0.01	24.9	[22.6 - 27.4%]	0.1746	0.01	22.8	[20 - 25.9%]	0.6892	0	0.93
Bradyrhizobium lablabi GAS522	Bradyrhizobium_sp_Tv2a-2	19.9	[16.7 - 23.5%]	0.714	0	22.5	[20.3 - 25%]	0.1944	0	19.4	[16.7 - 22.4%]	0.7696	0	0.14
Bradyrhizobium lablabi GAS522	Bradyrhizobium_sp_URHA0002	42.6	[39.2 - 46%]	0.3678	3.05	37.8	[35.3 - 40.3%]	0.1073	1.51	40.9	[38 - 44%]	0.4356	0.19	0.14
Bradyrhizobium lablabi GAS522	Bradyrhizobium_sp_URHA0013	22.2	[19 - 25.9%]	0.6558	0	22.8	[20.5 - 25.3%]	0.1919	0	21.3	[18.6 - 24.4%]	0.7219	0	1.43
Bradyrhizobium lablabi GAS522	Bradyrhizobium_sp_URHD0069	21.2	[18 - 24.8%]	0.6813	0	24.4	[22.1 - 26.9%]	0.1784	0.01	20.6	[17.9 - 23.7%]	0.7381	0	1.66
Bradyrhizobium lablabi GAS522	Bradyrhizobium_sp_USDA_3384	21.5	[18.3 - 25.2%]	0.6725	0	23.1	[20.8 - 25.5%]	0.1896	0	20.8	[18 - 23.9%]	0.7346	0	1.23
Bradyrhizobium lablabi GAS522	Bradyrhizobium_sp_WSM471	21.5	[18.3 - 25.1%]	0.6735	0	22.9	[20.6 - 25.4%]	0.191	0	20.7	[18 - 23.8%]	0.7359	0	1.07
Bradyrhizobium lablabi GAS522	Bradyrhizobium_sp_WSM1253	21.2	[18 - 24.8%]	0.6805	0	23.1	[20.8 - 25.5%]	0.1896	0	20.5	[17.8 - 23.6%]	0.7411	0	0.81
Bradyrhizobium lablabi GAS522	Bradyrhizobium_sp_WSM1417	21.4	[18.1 - 25%]	0.6769	0	22.9	[20.6 - 25.4%]	0.191	0	20.6	[17.9 - 23.7%]	0.7386	0	0.83
Bradyrhizobium lablabi GAS522	Bradyrhizobium_sp_WSM1743	21	[17.8 - 24.6%]	0.6858	0	23.1	[20.8 - 25.6%]	0.1894	0	20.4	[17.6 - 23.4%]	0.7453	0	1.04
Bradyrhizobium lablabi GAS522	Bradyrhizobium_sp_WSM2254	21.7	[18.5 - 25.4%]	0.6673	0	23.4	[21.1 - 25.9%]	0.1867	0	21	[18.2 - 24.1%]	0.7294	0	1.55
Bradyrhizobium lablabi GAS522	Bradyrhizobium_sp_WSM2793	21.1	[17.9 - 24.8%]	0.6825	0	23.3	[21 - 25.7%]	0.1881	0	20.5	[17.7 - 23.5%]	0.7422	0	1.19
Bradyrhizobium lablabi GAS522	Bradyrhizobium_sp_WSM3983	21.2	[17.9 - 24.8%]	0.6817	0	22.8	[20.5 - 25.3%]	0.1919	0	20.5	[17.7 - 23.5%]	0.7428	0	0.63
Bradyrhizobium lablabi GAS522	Bradyrhizobium_sp_WSM4349	21.1	[17.9 - 24.8%]	0.6825	0	22.9	[20.6 - 25.3%]	0.1915	0	20.4	[17.7 - 23.5%]	0.7433	0	0.8
Bradyrhizobium lablabi GAS522	Bradyrhizobium_sp_YR681	22.2	[18.9 - 25.8%]	0.657	0	23.1	[20.9 - 25.6%]	0.1891	0	21.3	[18.6 - 24.4%]	0.7218	0	2.38
Bradyrhizobium lablabi GAS522	Bradyrhizobium_stylosanthis_BR_446	22.1	[18.9 - 25.7%]	0.6589	0	23.2	[20.9 - 25.7%]	0.1884	0	21.3	[18.5 - 24.3%]	0.7232	0	2.22
Bradyrhizobium lablabi GAS522	Bradyrhizobium_tropiciagri_SEMIA_6148	23.7	[20.4 - 27.3%]	0.6239	0.01	24.8	[22.5 - 27.3%]	0.1755	0.01	22.8	[20 - 25.9%]	0.6899	0	1.16
Bradyrhizobium lablabi GAS522	Bradyrhizobium_valentinum_LmjM3	27.2	[23.8 - 30.8%]	0.5578	0.03	27.9	[25.5 - 30.4%]	0.1543	0.04	26.1	[23.2 - 29.2%]	0.626	0	0.42
Bradyrhizobium lablabi GAS522	Bradyrhizobium_valentinum_LmjM6	27	[23.7 - 30.7%]	0.5608	0.03	27.7	[25.4 - 30.2%]	0.1555	0.04	25.9	[23 - 29%]	0.6291	0	0.46
Bradyrhizobium lablabi GAS522	Bradyrhizobium_viridifuturi_SEMIA_690	24.8	[21.5 - 28.4%]	0.6019	0.01	24.7	[22.4 - 27.1%]	0.1767	0.01	23.6	[20.8 - 26.7%]	0.6722	0	1.69
Bradyrhizobium lablabi GAS522	Bradyrhizobium_yuanmingense_BR3267	21.4	[18.2 - 25.1%]	0.6749	0	23	[20.7 - 25.5%]	0.1901	0	20.7	[17.9 - 23.8%]	0.7367	0	1.53
Bradyrhizobium lablabi GAS522	Bradyrhizobium_yuanmingense_CCBAU_05623	20.9	[17.7 - 24.5%]	0.6878	0	23	[20.8 - 25.5%]	0.1899	0	20.3	[17.5 - 23.3%]	0.7471	0	1.45
Bradyrhizobium lablabi GAS522	Bradyrhizobium_yuanmingense_CCBAU_25021	21	[17.8 - 24.6%]	0.6859	0	23	[20.7 - 25.5%]	0.1902	0	20.3	[17.6 - 23.4%]	0.7456	0	1.47
Bradyrhizobium lablabi GAS522	Bradyrhizobium_yuanmingense_CCBAU_35157	20.8	[17.6 - 24.5%]	0.6895	0	23.1	[20.8 - 25.6%]	0.1892	0	20.2	[17.5 - 23.3%]	0.7483	0	1.6
Bradyrhizobium ottawaense GAS524	Bradyrhizobium sp. CF659	22.3	[19 - 25.9%]	0.6552	0	23.3	[21 - 25.8%]	0.1874	0	21.4	[18.6 - 24.5%]	0.7198	0	2.21
Bradyrhizobium ottawaense GAS524	Bradyrhizobium sp. ERR11	21.1	[17.8 - 24.7%]	0.6842	0	23	[20.8 - 25.5%]	0.1899	0	20.4	[17.6 - 23.5%]	0.7442	0	0.92
Bradyrhizobium ottawaense GAS524	Bradyrhizobium sp. Gha	20.3	[17.2 - 24%]	0.7024	0	22.7	[20.4 - 25.2%]	0.1928	0	19.8	[17.1 - 22.8%]	0.7598	0	0.56
Bradyrhizobium ottawaense GAS524	Bradyrhizobium sp. Ghvi	20.7	[17.5 - 24.3%]	0.6926	0	22.7	[20.4 - 25.1%]	0.1933	0	20.1	[17.3 - 23.1%]	0.752	0	0.73
Bradyrhizobium ottawaense GAS524	Bradyrhizobium sp. OK095	22.3	[19 - 25.9%]	0.6551	0	22.6	[20.4 - 25.1%]	0.1935	0	21.3	[18.6 - 24.4%]	0.7219	0	1.58
Bradyrhizobium ottawaense GAS524	Bradyrhizobium sp. R5	23.9	[20.6 - 27.6%]	0.6194	0.01	25	[22.6 - 27.4%]	0.1745	0.01	23	[20.1 - 26.1%]	0.6858	0	1.34
Bradyrhizobium ottawaense GAS524	Bradyrhizobium sp. Rc2d	20.6	[17.4 - 24.2%]	0.6954	0	23.1	[20.8 - 25.6%]	0.1895	0	20	[17.3 - 23.1%]	0.7531	0	0.52
Bradyrhizobium ottawaense GAS524	Bradyrhizobium sp. Rc3b	21.6	[18.3 - 25.2%]	0.6713	0	23.2	[20.9 - 25.6%]	0.1889	0	20.8	[18.1 - 23.9%]	0.7334	0	1.37
Bradyrhizobium ottawaense GAS524	Bradyrhizobium yuanmingense CCBAU 10071	21.2	[18 - 24.8%]	0.6807	0	22.9	[20.6 - 25.4%]	0.191	0	20.5	[17.7 - 23.6%]	0.7417	0	1.46
Bradyrhizobium ottawaense GAS524	Bradyrhizobium yuanmingense CGMCC 1.3531	21.2	[17.9 - 24.8%]	0.6814	0	22.9	[20.6 - 25.4%]	0.1911	0	20.5	[17.7 - 23.5%]	0.7423	0	1.47
Bradyrhizobium ottawaense GAS524	Mesorhizobium_ciceri_WSM1271_OUTGROUP	13.1	[10.4 - 16.4%]	0.9687	0	18.4	[16.3 - 20.8%]	0.2388	0	13.4	[11 - 16.2%]	0.9762	0	0.25
Bradyrhizobium ottawaense GAS524	Bradyrhizobium_diazoefficiens_SEMIA_5080	21.6	[18.4 - 25.2%]	0.6711	0	23.3	[21 - 25.8%]	0.1875	0	20.9	[18.1 - 23.9%]	0.7328	0	1.67
Bradyrhizobium ottawaense GAS524	Bradyrhizobium_diazoefficiens_USDA_110	21.7	[18.4 - 25.3%]	0.6691	0	23.3	[21 - 25.8%]	0.1877	0	20.9	[18.2 - 24%]	0.7312	0	1.75
Bradyrhizobium ottawaense GAS524	Bradyrhizobium_elkanii_587	21.6	[18.4 - 25.3%]	0.6699	0	25.6	[23.3 - 28.1%]	0.1694	0.01	21.2	[18.4 - 24.2%]	0.7258	0	1.34
Bradyrhizobium ottawaense GAS524	Bradyrhizobium_elkanii_BLY3-8	24.2	[20.9 - 27.8%]	0.6137	0.01	25	[22.7 - 27.5%]	0.1743	0.01	23.2	[20.4 - 26.3%]	0.681	0	1.5
Bradyrhizobium ottawaense GAS524	Bradyrhizobium_elkanii_BLY6-1	24.2	[20.9 - 27.8%]	0.6134	0.01	25	[22.7 - 27.5%]	0.1743	0.01	23.2	[20.4 - 26.3%]	0.6808	0	1.5
Bradyrhizobium ottawaense GAS524	Bradyrhizobium_elkanii_CCBAU_05737	23.2	[19.9 - 26.8%]	0.6347	0	25.2	[22.9 - 27.7%]	0.1724	0.01	22.4	[19.6 - 25.5%]	0.6976	0	1.2
Bradyrhizobium ottawaense GAS524	Bradyrhizobium_elkanii_CCBAU_43297	23.7	[20.4 - 27.3%]	0.6248	0.01	25.2	[22.9 - 27.7%]	0.1726	0.01	22.8	[20 - 25.9%]	0.6895	0	1.44
Bradyrhizobium ottawaense GAS524	Bradyrhizobium_elkanii_UASWS1015	24.7	[21.4 - 28.4%]	0.6033	0.01	24.6	[22.3 - 27.1%]	0.1773	0.01	23.6	[20.7 - 26.7%]	0.6736	0	2.33
Bradyrhizobium ottawaense GAS524	Bradyrhizobium_elkanii_USDA_76	24.1	[20.8 - 27.8%]	0.6154	0.01	25	[22.7 - 27.5%]	0.1738	0.01	23.1	[20.3 - 26.2%]	0.6822	0	1.41
Bradyrhizobium ottawaense GAS524	Bradyrhizobium_elkanii_USDA_94	24	[20.7 - 27.7%]	0.6168	0.01	25	[22.7 - 27.5%]	0.1743	0.01	23.1	[20.3 - 26.2%]	0.6836	0	1.44
Bradyrhizobium ottawaense GAS524	Bradyrhizobium_elkanii_USDA_3254	24.4	[21.1 - 28%]	0.6097	0.01	24.9	[22.5 - 27.3%]	0.1752	0.01	23.3	[20.5 - 26.4%]	0.6781	0	1.47
Bradyrhizobium ottawaense GAS524	Bradyrhizobium_elkanii_USDA_3259	24.6	[21.3 - 28.3%]	0.6047	0.01	24.8	[22.5 - 27.3%]	0.1753	0.01	23.5	[20.7 - 26.6%]	0.674	0	1.61
Bradyrhizobium ottawaense GAS524	Bradyrhizobium_elkanii_WSM1741	27.5	[24.2 - 31.1%]	0.5524	0.03	27	[24.7 - 29.5%]	0.1598	0.03	26.2	[23.3 - 29.3%]	0.6239	0	0.21
Bradyrhizobium ottawaense GAS524	Bradyrhizobium_elkanii_WSM2783	21.7	[18.4 - 25.3%]	0.6688	0	24.8	[22.5 - 27.3%]	0.1757	0.01	21.1	[18.3 - 24.2%]	0.727	0	0.05
Bradyrhizobium ottawaense GAS524	Bradyrhizobium_embrapense_SEMIA_6208	24.7	[21.4 - 28.4%]	0.6026	0.01	24.6	[22.3 - 27.1%]	0.1769	0.01	23.6	[20.8 - 26.7%]	0.6729	0	1.67
Bradyrhizobium ottawaense GAS524	Bradyrhizobium_icense_LMTR_13	27	[23.6 - 30.6%]	0.5612	0.03	27.2	[24.8 - 29.7%]	0.1588	0.03	25.8	[22.9 - 28.9%]	0.6309	0	0.28
Bradyrhizobium ottawaense GAS524	Bradyrhizobium_japonicum_22	22.1	[18.9 - 25.7%]	0.6589	0	22.9	[20.6 - 25.3%]	0.1914	0	21.2	[18.5 - 24.3%]	0.7242	0	2.22
Bradyrhizobium ottawaense GAS524	Bradyrhizobium_japonicum_CCBA_15517	20.7	[17.5 - 24.3%]	0.6939	0	23.4	[21.1 - 25.8%]	0.1871	0	20.1	[17.4 - 23.2%]	0.7511	0	1.09
Bradyrhizobium ottawaense GAS524	Bradyrhizobium_japonicum_CCBAU_15354	20.6	[17.4 - 24.3%]	0.6945	0	23.4	[21.1 - 25.9%]	0.1865	0	20.1	[17.4 - 23.2%]	0.7515	0	1.02
Bradyrhizobium ottawaense GAS524	Bradyrhizobium_japonicum_CCBAU_15618	21	[17.7 - 24.6%]	0.6869	0	23.2	[20.9 - 25.7%]	0.1886	0	20.3	[17.6 - 23.4%]	0.7459	0	1.11
Bradyrhizobium ottawaense GAS524	Bradyrhizobium_japonicum_CCBAU_25435	21.3	[18.1 - 25%]	0.6774	0	23.2	[20.9 - 25.6%]	0.189	0	20.6	[17.9 - 23.7%]	0.7383	0	1.17
Bradyrhizobium ottawaense GAS524	Bradyrhizobium_japonicum_CCBAU_83623	20.5	[17.3 - 24.1%]	0.6982	0	23.4	[21.1 - 25.9%]	0.1865	0	20	[17.3 - 23%]	0.7545	0	1
Bradyrhizobium ottawaense GAS524	Bradyrhizobium_japonicum_E109	21.9	[18.7 - 25.6%]	0.6631	0	23	[20.7 - 25.5%]	0.19	0	21.1	[18.3 - 24.2%]	0.7271	0	1.35
Bradyrhizobium ottawaense GAS524	Bradyrhizobium_japonicum_FN1	21.9	[18.7 - 25.6%]	0.6632	0	23	[20.7 - 25.5%]	0.1902	0	21.1	[18.3 - 24.2%]	0.7272	0	1.38
Bradyrhizobium ottawaense GAS524	Bradyrhizobium_japonicum_in8p8	20.6	[17.4 - 24.2%]	0.6964	0	22.7	[20.5 - 25.2%]	0.1926	0	20	[17.2 - 23%]	0.7549	0	1.48
Bradyrhizobium ottawaense GAS524	Bradyrhizobium_japonicum_Is-1	21.6	[18.4 - 25.3%]	0.6703	0	23.3	[21 - 25.8%]	0.1877	0	20.9	[18.1 - 24%]	0.7322	0	1.69
Bradyrhizobium ottawaense GAS524	Bradyrhizobium_japonicum_is5	20.6	[17.4 - 24.2%]	0.6961	0	22.7	[20.5 - 25.2%]	0.1926	0	20	[17.2 - 23%]	0.7546	0	1.48
Bradyrhizobium ottawaense GAS524	Bradyrhizobium_japonicum_Is-34	21	[17.7 - 24.6%]	0.6866	0	23.1	[20.8 - 25.6%]	0.1895	0	20.3	[17.6 - 23.4%]	0.746	0	0.74
Bradyrhizobium ottawaense GAS524	Bradyrhizobium_japonicum_SEMIA_5079	21.6	[18.4 - 25.3%]	0.6704	0	23	[20.7 - 25.5%]	0.1902	0	20.9	[18.1 - 23.9%]	0.7331	0	1.24
Bradyrhizobium ottawaense GAS524	Bradyrhizobium_japonicum_USDA_4	21.6	[18.3 - 25.2%]	0.6719	0	23.1	[20.8 - 25.6%]	0.1895	0	20.8	[18.1 - 23.9%]	0.7341	0	1.37
Bradyrhizobium ottawaense GAS524	Bradyrhizobium_japonicum_USDA_6	21.8	[18.6 - 25.5%]	0.6653	0	23.1	[20.8 - 25.5%]	0.1896	0	21	[18.3 - 24.1%]	0.7287	0	1.36
Bradyrhizobium ottawaense GAS524	Bradyrhizobium_japonicum_USDA_38	21.3	[18.1 - 24.9%]	0.6787	0	23.1	[20.8 - 25.5%]	0.1895	0	20.6	[17.8 - 23.6%]	0.7396	0	1.23
Bradyrhizobium ottawaense GAS524	Bradyrhizobium_japonicum_USDA_122	21.6	[18.3 - 25.2%]	0.6713	0	23.3	[21 - 25.7%]	0.1879	0	20.9	[18.1 - 23.9%]	0.733	0	1.69
Bradyrhizobium ottawaense GAS524	Bradyrhizobium_japonicum_USDA_123	20.9	[17.7 - 24.5%]	0.6878	0	23.3	[21 - 25.7%]	0.1881	0	20.3	[17.6 - 23.4%]	0.7465	0	0.97
Bradyrhizobium ottawaense GAS524	Bradyrhizobium_japonicum_USDA_124	21.8	[18.6 - 25.4%]	0.6662	0	23.1	[20.8 - 25.5%]	0.1896	0	21	[18.2 - 24.1%]	0.7295	0	1.74
Bradyrhizobium ottawaense GAS524	Bradyrhizobium_japonicum_USDA_135	21	[17.8 - 24.6%]	0.6851	0	23.2	[20.9 - 25.6%]	0.189	0	20.4	[17.6 - 23.4%]	0.7446	0	1.66
Bradyrhizobium ottawaense GAS524	Bradyrhizobium_jicamae_PAC68	27.4	[24.1 - 31.1%]	0.5535	0.03	27.3	[24.9 - 29.8%]	0.1581	0.03	26.2	[23.3 - 29.3%]	0.6241	0	0.09
Bradyrhizobium ottawaense GAS524	Bradyrhizobium_liaoningense_CCBAU_05525	20.2	[17.1 - 23.9%]	0.7052	0	23.3	[21 - 25.8%]	0.1875	0	19.8	[17 - 22.8%]	0.7605	0	1.49
Bradyrhizobium ottawaense GAS524	Bradyrhizobium_liaoningense_CCBAU_83689	20.3	[17.1 - 23.9%]	0.7033	0	23.3	[21 - 25.8%]	0.1875	0	19.8	[17.1 - 22.9%]	0.7589	0	1.53
Bradyrhizobium ottawaense GAS524	Bradyrhizobium_liaoningense_CCNWSX0360	20.7	[17.5 - 24.3%]	0.694	0	23.1	[20.8 - 25.5%]	0.1896	0	20.1	[17.3 - 23.1%]	0.752	0	1.4
Bradyrhizobium ottawaense GAS524	Rhizobium_lupini_HPC_L_OUTGROUP	12.7	[10 - 16%]	0.9882	0	18.1	[16 - 20.5%]	0.2428	0	13.1	[10.7 - 15.8%]	0.9911	0	3.09
Bradyrhizobium ottawaense GAS524	Bradyrhizobium_manausense_BR3351	20.1	[17 - 23.8%]	0.7078	0	22.9	[20.6 - 25.4%]	0.1909	0	19.6	[16.9 - 22.7%]	0.7635	0	0.56
Bradyrhizobium ottawaense GAS524	Bradyrhizobium_neotropicale_BR_10247	21.9	[18.7 - 25.6%]	0.6629	0	23.3	[21 - 25.8%]	0.1876	0	21.1	[18.4 - 24.2%]	0.7261	0	1.29
Bradyrhizobium ottawaense GAS524	Bradyrhizobium_oligotrophicum_S58	19	[15.9 - 22.6%]	0.7397	0	22.6	[20.3 - 25%]	0.194	0	18.6	[16 - 21.7%]	0.7902	0	2.82
Bradyrhizobium ottawaense GAS524	Bradyrhizobium_pachyrhizi_BR3262	24.4	[21.1 - 28%]	0.6098	0.01	24.9	[22.6 - 27.4%]	0.1747	0.01	23.4	[20.5 - 26.4%]	0.6779	0	1.46
Bradyrhizobium ottawaense GAS524	Bradyrhizobium_pachyrhizi_PAC_48	24.5	[21.2 - 28.1%]	0.6078	0.01	24.9	[22.6 - 27.4%]	0.175	0.01	23.4	[20.6 - 26.5%]	0.6765	0	1.45
Bradyrhizobium ottawaense GAS524	Bradyrhizobium_paxllaeri_LMTR_21	28.8	[25.4 - 32.4%]	0.5315	0.06	27.2	[24.8 - 29.7%]	0.1588	0.03	27.3	[24.4 - 30.4%]	0.6059	0	0.18
Bradyrhizobium ottawaense GAS524	Bradyrhizobium_retamae_Ro19	26.7	[23.3 - 30.3%]	0.5668	0.02	26.9	[24.6 - 29.4%]	0.1605	0.03	25.5	[22.6 - 28.6%]	0.6364	0	0.44
Bradyrhizobium ottawaense GAS524	Bradyrhizobium_sp_17-4	21.2	[17.9 - 24.8%]	0.6815	0	26	[23.7 - 28.5%]	0.1668	0.02	20.8	[18 - 23.9%]	0.7346	0	1.57
Bradyrhizobium ottawaense GAS524	Bradyrhizobium_sp_Ai1a-2	22.4	[19.2 - 26.1%]	0.6513	0	24.5	[22.2 - 27%]	0.178	0.01	21.7	[18.9 - 24.8%]	0.7134	0	0.27
Bradyrhizobium ottawaense GAS524	Bradyrhizobium_sp_ARR65	18.8	[15.7 - 22.4%]	0.7461	0	22.5	[20.2 - 24.9%]	0.195	0	18.5	[15.8 - 21.5%]	0.7956	0	0.3
Bradyrhizobium ottawaense GAS524	Bradyrhizobium_sp_AT1	21.9	[18.7 - 25.6%]	0.6627	0	23.1	[20.9 - 25.6%]	0.1891	0	21.1	[18.4 - 24.2%]	0.7265	0	2.25
Bradyrhizobium ottawaense GAS524	Bradyrhizobium_sp_BF49	21.6	[18.4 - 25.3%]	0.6701	0	22.9	[20.7 - 25.4%]	0.1908	0	20.9	[18.1 - 23.9%]	0.733	0	1.46
Bradyrhizobium ottawaense GAS524	Bradyrhizobium_sp_BR_10245	20.7	[17.5 - 24.3%]	0.6926	0	23.3	[21 - 25.8%]	0.1877	0	20.1	[17.4 - 23.2%]	0.7503	0	0.91
Bradyrhizobium ottawaense GAS524	Bradyrhizobium_sp_BR_10303	23.6	[20.3 - 27.2%]	0.6265	0.01	24.6	[22.3 - 27.1%]	0.1772	0.01	22.6	[19.8 - 25.7%]	0.6927	0	0.94
Bradyrhizobium ottawaense GAS524	Bradyrhizobium_sp_CCBAU_15544	21.2	[18 - 24.8%]	0.681	0	23.3	[21 - 25.7%]	0.1881	0	20.5	[17.8 - 23.6%]	0.741	0	1.43
Bradyrhizobium ottawaense GAS524	Bradyrhizobium_sp_CCBAU_15615	21.2	[18 - 24.8%]	0.681	0	23.2	[20.9 - 25.7%]	0.1886	0	20.5	[17.8 - 23.6%]	0.7412	0	1.37
Bradyrhizobium ottawaense GAS524	Bradyrhizobium_sp_CCBAU_15635	21.5	[18.3 - 25.2%]	0.6723	0	23.2	[20.9 - 25.7%]	0.1885	0	20.8	[18 - 23.9%]	0.7341	0	1.51
Bradyrhizobium ottawaense GAS524	Bradyrhizobium_sp_CCBAU_41267	21.3	[18 - 24.9%]	0.6788	0	23.4	[21.1 - 25.9%]	0.1865	0	20.6	[17.9 - 23.7%]	0.7388	0	1.7
Bradyrhizobium ottawaense GAS524	Bradyrhizobium_sp_CCBAU_43298	20.8	[17.6 - 24.5%]	0.6898	0	23.2	[20.9 - 25.7%]	0.1884	0	20.2	[17.5 - 23.3%]	0.7483	0	1.57
Bradyrhizobium ottawaense GAS524	Bradyrhizobium_sp_CCGE-LA001	21.8	[18.6 - 25.4%]	0.666	0	22.8	[20.5 - 25.3%]	0.192	0	21	[18.2 - 24%]	0.7302	0	1.26
Bradyrhizobium ottawaense GAS524	Bradyrhizobium_sp_CCH4-A6	15.8	[12.9 - 19.3%]	0.8469	0	21.6	[19.3 - 24%]	0.2033	0	15.9	[13.3 - 18.8%]	0.878	0	1.41
Bradyrhizobium ottawaense GAS524	Bradyrhizobium_sp_CCH5-F6	20.5	[17.3 - 24.1%]	0.6977	0	23.1	[20.8 - 25.6%]	0.1891	0	20	[17.2 - 23%]	0.7548	0	1.81
Bradyrhizobium ottawaense GAS524	Bradyrhizobium_sp_CCH10-C7	15.7	[12.8 - 19.2%]	0.8489	0	21.6	[19.3 - 24%]	0.2034	0	15.8	[13.3 - 18.7%]	0.8797	0	1.59
Bradyrhizobium ottawaense GAS524	Bradyrhizobium_sp_Cp5_3	21.5	[18.3 - 25.2%]	0.6723	0	23.1	[20.8 - 25.5%]	0.1896	0	20.8	[18 - 23.9%]	0.7344	0	1.1
Bradyrhizobium ottawaense GAS524	Bradyrhizobium_sp_DFCI-1	25.1	[21.8 - 28.8%]	0.5951	0.01	24.6	[22.3 - 27.1%]	0.1771	0.01	23.9	[21.1 - 27%]	0.6668	0	2.14
Bradyrhizobium ottawaense GAS524	Bradyrhizobium_sp_DOA1	21.5	[18.3 - 25.1%]	0.6732	0	22.9	[20.6 - 25.4%]	0.1911	0	20.7	[18 - 23.8%]	0.7356	0	1.5
Bradyrhizobium ottawaense GAS524	Bradyrhizobium_sp_DOA9	22.1	[18.8 - 25.7%]	0.66	0	23	[20.7 - 25.4%]	0.1906	0	21.2	[18.4 - 24.3%]	0.7248	0	2.18
Bradyrhizobium ottawaense GAS524	Bradyrhizobium_sp_Ec3_3	20.1	[16.9 - 23.7%]	0.7094	0	23.1	[20.8 - 25.6%]	0.1891	0	19.6	[16.9 - 22.6%]	0.7644	0	0.33
Bradyrhizobium ottawaense GAS524	Bradyrhizobium_sp_G22	22	[18.7 - 25.6%]	0.6619	0	23.1	[20.8 - 25.5%]	0.1897	0	21.2	[18.4 - 24.2%]	0.726	0	1.42
Bradyrhizobium ottawaense GAS524	Bradyrhizobium_sp_Leaf396	20.3	[17.1 - 23.9%]	0.7047	0	22.7	[20.4 - 25.2%]	0.1929	0	19.7	[17 - 22.7%]	0.7616	0	1.48
Bradyrhizobium ottawaense GAS524	Bradyrhizobium_sp_LMTR_3	27.9	[24.5 - 31.5%]	0.5458	0.04	27.2	[24.9 - 29.7%]	0.1586	0.03	26.6	[23.7 - 29.7%]	0.6179	0	0.04
Bradyrhizobium ottawaense GAS524	Bradyrhizobium_sp_LTSP849	21.9	[18.6 - 25.5%]	0.6645	0	22.9	[20.7 - 25.4%]	0.1909	0	21	[18.3 - 24.1%]	0.7285	0	0.94
Bradyrhizobium ottawaense GAS524	Bradyrhizobium_sp_LTSP857	21.9	[18.6 - 25.5%]	0.6646	0	22.9	[20.6 - 25.4%]	0.191	0	21	[18.3 - 24.1%]	0.7286	0	0.98
Bradyrhizobium ottawaense GAS524	Bradyrhizobium_sp_LTSP885	25.4	[22 - 29%]	0.5904	0.01	24.9	[22.6 - 27.4%]	0.1745	0.01	24.2	[21.3 - 27.3%]	0.6619	0	1.08
Bradyrhizobium ottawaense GAS524	Bradyrhizobium_sp_LTSPM299	24.8	[21.5 - 28.5%]	0.6012	0.01	25.4	[23.1 - 27.9%]	0.171	0.01	23.8	[20.9 - 26.9%]	0.6694	0	0.51
Bradyrhizobium ottawaense GAS524	Bradyrhizobium_sp_OHSU_III	25	[21.6 - 28.6%]	0.5983	0.01	24.6	[22.3 - 27.1%]	0.1772	0.01	23.8	[20.9 - 26.9%]	0.6694	0	2.4
Bradyrhizobium ottawaense GAS524	Bradyrhizobium_sp_ORS_278	19	[15.8 - 22.6%]	0.7403	0	22.6	[20.3 - 25.1%]	0.1938	0	18.6	[16 - 21.6%]	0.7906	0	3.2
Bradyrhizobium ottawaense GAS524	Bradyrhizobium_sp_ORS_285	18.9	[15.8 - 22.5%]	0.7422	0	22.5	[20.3 - 25%]	0.1945	0	18.6	[15.9 - 21.6%]	0.7924	0	2.92
Bradyrhizobium ottawaense GAS524	Bradyrhizobium_sp_ORS_375	18.9	[15.8 - 22.5%]	0.7429	0	22.8	[20.5 - 25.2%]	0.1925	0	18.6	[15.9 - 21.6%]	0.7924	0	3.19
Bradyrhizobium ottawaense GAS524	Bradyrhizobium_sp_S23321	22.7	[19.4 - 26.3%]	0.6458	0	22.9	[20.6 - 25.4%]	0.191	0	21.7	[18.9 - 24.8%]	0.7135	0	1.99
Bradyrhizobium ottawaense GAS524	Bradyrhizobium_sp_STM_3809	19.2	[16.1 - 22.8%]	0.7336	0	23	[20.7 - 25.5%]	0.1902	0	18.9	[16.2 - 21.9%]	0.7843	0	3.88
Bradyrhizobium ottawaense GAS524	Bradyrhizobium_sp_STM_3843	18.2	[15.1 - 21.7%]	0.7653	0	22.7	[20.4 - 25.1%]	0.1933	0	17.9	[15.3 - 20.9%]	0.8107	0	1.29
Bradyrhizobium ottawaense GAS524	Bradyrhizobium_sp_th_b2	23.8	[20.5 - 27.5%]	0.6208	0.01	24.9	[22.5 - 27.3%]	0.1753	0.01	22.9	[20.1 - 26%]	0.6873	0	0.96
Bradyrhizobium ottawaense GAS524	Bradyrhizobium_sp_Tv2a-2	19.9	[16.7 - 23.5%]	0.715	0	22.5	[20.3 - 25%]	0.1944	0	19.4	[16.7 - 22.4%]	0.7704	0	0.11
Bradyrhizobium ottawaense GAS524	Bradyrhizobium_sp_URHA0002	42.3	[38.9 - 45.7%]	0.3706	2.85	37.8	[35.3 - 40.3%]	0.1073	1.5	40.7	[37.7 - 43.7%]	0.4381	0.17	0.11
Bradyrhizobium ottawaense GAS524	Bradyrhizobium_sp_URHA0013	22.2	[18.9 - 25.8%]	0.6573	0	22.8	[20.5 - 25.3%]	0.1919	0	21.3	[18.5 - 24.3%]	0.7231	0	1.46
Bradyrhizobium ottawaense GAS524	Bradyrhizobium_sp_URHD0069	21.1	[17.9 - 24.7%]	0.6827	0	24.4	[22.1 - 26.9%]	0.1785	0.01	20.6	[17.8 - 23.7%]	0.7393	0	1.63
Bradyrhizobium ottawaense GAS524	Bradyrhizobium_sp_USDA_3384	21.5	[18.2 - 25.1%]	0.6738	0	23.1	[20.8 - 25.5%]	0.1896	0	20.7	[18 - 23.8%]	0.7356	0	1.26
Bradyrhizobium ottawaense GAS524	Bradyrhizobium_sp_WSM471	21.4	[18.2 - 25.1%]	0.6749	0	22.9	[20.6 - 25.4%]	0.191	0	20.7	[17.9 - 23.8%]	0.737	0	1.1
Bradyrhizobium ottawaense GAS524	Bradyrhizobium_sp_WSM1253	21.2	[17.9 - 24.8%]	0.6818	0	23.1	[20.8 - 25.5%]	0.1897	0	20.5	[17.7 - 23.5%]	0.7421	0	0.84
Bradyrhizobium ottawaense GAS524	Bradyrhizobium_sp_WSM1417	21.3	[18.1 - 24.9%]	0.6782	0	22.9	[20.6 - 25.4%]	0.191	0	20.6	[17.8 - 23.6%]	0.7397	0	0.86
Bradyrhizobium ottawaense GAS524	Bradyrhizobium_sp_WSM1743	20.9	[17.7 - 24.6%]	0.6869	0	23.1	[20.8 - 25.6%]	0.1895	0	20.3	[17.6 - 23.4%]	0.7462	0	1.07
Bradyrhizobium ottawaense GAS524	Bradyrhizobium_sp_WSM2254	21.7	[18.5 - 25.3%]	0.6684	0	23.4	[21.1 - 25.9%]	0.1868	0	21	[18.2 - 24%]	0.7303	0	1.58
Bradyrhizobium ottawaense GAS524	Bradyrhizobium_sp_WSM2793	21.1	[17.9 - 24.7%]	0.6835	0	23.2	[21 - 25.7%]	0.1882	0	20.4	[17.7 - 23.5%]	0.7431	0	1.22
Bradyrhizobium ottawaense GAS524	Bradyrhizobium_sp_WSM3983	21.1	[17.9 - 24.7%]	0.6827	0	22.8	[20.5 - 25.3%]	0.192	0	20.4	[17.7 - 23.5%]	0.7436	0	0.67
Bradyrhizobium ottawaense GAS524	Bradyrhizobium_sp_WSM4349	21.1	[17.9 - 24.7%]	0.6838	0	22.9	[20.6 - 25.3%]	0.1915	0	20.4	[17.6 - 23.4%]	0.7443	0	0.83
Bradyrhizobium ottawaense GAS524	Bradyrhizobium_sp_YR681	22.1	[18.9 - 25.8%]	0.6582	0	23.1	[20.8 - 25.6%]	0.1892	0	21.3	[18.5 - 24.4%]	0.7228	0	2.42
Bradyrhizobium ottawaense GAS524	Bradyrhizobium_stylosanthis_BR_446	22.1	[18.8 - 25.7%]	0.66	0	23.2	[20.9 - 25.7%]	0.1885	0	21.2	[18.5 - 24.3%]	0.7241	0	2.25
Bradyrhizobium ottawaense GAS524	Bradyrhizobium_tropiciagri_SEMIA_6148	23.6	[20.3 - 27.3%]	0.6255	0.01	24.8	[22.5 - 27.3%]	0.1755	0.01	22.7	[19.9 - 25.8%]	0.6912	0	1.19
Bradyrhizobium ottawaense GAS524	Bradyrhizobium_valentinum_LmjM3	27.1	[23.7 - 30.7%]	0.5595	0.03	27.9	[25.5 - 30.4%]	0.1543	0.04	26	[23.1 - 29.1%]	0.6275	0	0.39
Bradyrhizobium ottawaense GAS524	Bradyrhizobium_valentinum_LmjM6	26.9	[23.6 - 30.6%]	0.5625	0.03	27.7	[25.4 - 30.2%]	0.1555	0.04	25.8	[23 - 29%]	0.6305	0	0.42
Bradyrhizobium ottawaense GAS524	Bradyrhizobium_viridifuturi_SEMIA_690	24.7	[21.4 - 28.3%]	0.6035	0.01	24.7	[22.4 - 27.1%]	0.1767	0.01	23.6	[20.7 - 26.7%]	0.6736	0	1.72
Bradyrhizobium ottawaense GAS524	Bradyrhizobium_yuanmingense_BR3267	21.4	[18.2 - 25%]	0.676	0	23	[20.7 - 25.5%]	0.1902	0	20.7	[17.9 - 23.7%]	0.7376	0	1.56
Bradyrhizobium ottawaense GAS524	Bradyrhizobium_yuanmingense_CCBAU_05623	20.9	[17.7 - 24.5%]	0.6888	0	23	[20.7 - 25.5%]	0.1901	0	20.2	[17.5 - 23.3%]	0.748	0	1.48
Bradyrhizobium ottawaense GAS524	Bradyrhizobium_yuanmingense_CCBAU_25021	20.9	[17.7 - 24.6%]	0.6869	0	23	[20.7 - 25.5%]	0.1903	0	20.3	[17.6 - 23.4%]	0.7465	0	1.5
Bradyrhizobium ottawaense GAS524	Bradyrhizobium_yuanmingense_CCBAU_35157	20.8	[17.6 - 24.4%]	0.6905	0	23.1	[20.8 - 25.6%]	0.1894	0	20.2	[17.5 - 23.2%]	0.7491	0	1.63
Bradyrhizobium sp. CF659	Bradyrhizobium sp. ERR11	45.6	[42.2 - 49%]	0.3416	5.65	36.3	[33.8 - 38.8%]	0.1129	0.98	43	[40 - 46%]	0.4159	0.37	1.29
Bradyrhizobium sp. CF659	Bradyrhizobium sp. Gha	36.8	[33.4 - 40.3%]	0.4265	0.74	32.1	[29.7 - 34.6%]	0.1313	0.24	34.8	[31.8 - 37.8%]	0.5018	0.02	1.65
Bradyrhizobium sp. CF659	Bradyrhizobium sp. Ghvi	41.2	[37.8 - 44.6%]	0.3809	2.23	32.2	[29.8 - 34.7%]	0.131	0.25	38.3	[35.4 - 41.4%]	0.462	0.07	1.48
Bradyrhizobium sp. CF659	Bradyrhizobium sp. OK095	54.3	[50.7 - 57.7%]	0.2767	22.72	36.6	[34.2 - 39.1%]	0.1117	1.08	50	[46.9 - 53.1%]	0.3575	2.81	0.63
Bradyrhizobium sp. CF659	Bradyrhizobium sp. R5	24.1	[20.8 - 27.8%]	0.6152	0.01	24.4	[22.1 - 26.9%]	0.1787	0.01	23.1	[20.2 - 26.2%]	0.684	0	0.87
Bradyrhizobium sp. CF659	Bradyrhizobium sp. Rc2d	42.8	[39.5 - 46.3%]	0.3657	3.21	36.3	[33.9 - 38.8%]	0.1128	0.99	40.8	[37.8 - 43.8%]	0.4373	0.18	1.69
Bradyrhizobium sp. CF659	Bradyrhizobium sp. Rc3b	48.9	[45.5 - 52.4%]	0.3149	10.32	36.1	[33.6 - 38.6%]	0.1138	0.92	45.6	[42.6 - 48.7%]	0.3929	0.83	0.84
Bradyrhizobium sp. CF659	Bradyrhizobium yuanmingense CCBAU 10071	45.1	[41.7 - 48.5%]	0.3457	5.14	34.7	[32.3 - 37.2%]	0.1195	0.6	42.2	[39.2 - 45.2%]	0.4239	0.28	0.75
Bradyrhizobium sp. CF659	Bradyrhizobium yuanmingense CGMCC 1.3531	45.1	[41.7 - 48.5%]	0.3458	5.12	34.7	[32.3 - 37.2%]	0.1195	0.6	42.1	[39.2 - 45.2%]	0.424	0.28	0.74
Bradyrhizobium sp. CF659	Mesorhizobium_ciceri_WSM1271_OUTGROUP	13.2	[10.5 - 16.5%]	0.9612	0	18.2	[16 - 20.5%]	0.2419	0	13.5	[11.2 - 16.3%]	0.9706	0	1.96
Bradyrhizobium sp. CF659	Bradyrhizobium_diazoefficiens_SEMIA_5080	61.5	[57.8 - 65.1%]	0.2308	47.54	53.6	[50.9 - 56.2%]	0.0638	30.06	61.2	[57.9 - 64.3%]	0.2799	30.42	0.54
Bradyrhizobium sp. CF659	Bradyrhizobium_diazoefficiens_USDA_110	62	[58.3 - 65.6%]	0.228	49.3	53.5	[50.8 - 56.2%]	0.0639	29.99	61.6	[58.3 - 64.8%]	0.2773	32.42	0.46
Bradyrhizobium sp. CF659	Bradyrhizobium_elkanii_587	21.6	[18.4 - 25.3%]	0.6698	0	25	[22.7 - 27.5%]	0.1739	0.01	21.1	[18.3 - 24.2%]	0.7272	0	0.87
Bradyrhizobium sp. CF659	Bradyrhizobium_elkanii_BLY3-8	24.4	[21.1 - 28%]	0.6101	0.01	24.4	[22.1 - 26.9%]	0.1789	0.01	23.3	[20.4 - 26.4%]	0.6799	0	0.71
Bradyrhizobium sp. CF659	Bradyrhizobium_elkanii_BLY6-1	24.4	[21.1 - 28%]	0.61	0.01	24.4	[22.1 - 26.9%]	0.1789	0.01	23.3	[20.4 - 26.4%]	0.6798	0	0.71
Bradyrhizobium sp. CF659	Bradyrhizobium_elkanii_CCBAU_05737	23.2	[19.9 - 26.8%]	0.6348	0	24.5	[22.2 - 27%]	0.178	0.01	22.3	[19.5 - 25.4%]	0.6998	0	1.01
Bradyrhizobium sp. CF659	Bradyrhizobium_elkanii_CCBAU_43297	23.6	[20.3 - 27.2%]	0.626	0.01	24.6	[22.3 - 27%]	0.1774	0.01	22.7	[19.8 - 25.7%]	0.6924	0	0.77
Bradyrhizobium sp. CF659	Bradyrhizobium_elkanii_UASWS1015	24.2	[20.9 - 27.9%]	0.6128	0.01	24.2	[21.9 - 26.6%]	0.1805	0.01	23.1	[20.3 - 26.2%]	0.6827	0	0.12
Bradyrhizobium sp. CF659	Bradyrhizobium_elkanii_USDA_76	24.1	[20.8 - 27.8%]	0.6148	0.01	24.4	[22.1 - 26.8%]	0.1789	0.01	23.1	[20.2 - 26.2%]	0.6837	0	0.8
Bradyrhizobium sp. CF659	Bradyrhizobium_elkanii_USDA_94	24.2	[20.9 - 27.8%]	0.6139	0.01	24.3	[22 - 26.8%]	0.1796	0.01	23.1	[20.3 - 26.2%]	0.6833	0	0.77
Bradyrhizobium sp. CF659	Bradyrhizobium_elkanii_USDA_3254	24.3	[21 - 28%]	0.6106	0.01	24.3	[22 - 26.7%]	0.1797	0.01	23.2	[20.4 - 26.3%]	0.6806	0	0.74
Bradyrhizobium sp. CF659	Bradyrhizobium_elkanii_USDA_3259	24.6	[21.3 - 28.3%]	0.605	0.01	24.3	[22 - 26.7%]	0.1798	0.01	23.4	[20.6 - 26.5%]	0.676	0	0.6
Bradyrhizobium sp. CF659	Bradyrhizobium_elkanii_WSM1741	22.6	[19.4 - 26.3%]	0.6466	0	23	[20.7 - 25.5%]	0.1902	0	21.7	[18.9 - 24.8%]	0.7138	0	2.42
Bradyrhizobium sp. CF659	Bradyrhizobium_elkanii_WSM2783	21.8	[18.5 - 25.4%]	0.6669	0	23.9	[21.6 - 26.3%]	0.183	0	21.1	[18.3 - 24.1%]	0.7278	0	2.17
Bradyrhizobium sp. CF659	Bradyrhizobium_embrapense_SEMIA_6208	24.3	[21 - 27.9%]	0.6123	0.01	24.2	[21.9 - 26.6%]	0.1806	0.01	23.1	[20.3 - 26.2%]	0.6823	0	0.54
Bradyrhizobium sp. CF659	Bradyrhizobium_icense_LMTR_13	22	[18.7 - 25.6%]	0.6622	0	23.1	[20.9 - 25.6%]	0.189	0	21.2	[18.4 - 24.2%]	0.7261	0	2.49
Bradyrhizobium sp. CF659	Bradyrhizobium_japonicum_22	44.1	[40.8 - 47.6%]	0.354	4.22	35.1	[32.7 - 37.6%]	0.1177	0.68	41.5	[38.5 - 44.5%]	0.4301	0.23	0.01
Bradyrhizobium sp. CF659	Bradyrhizobium_japonicum_CCBA_15517	44.7	[41.3 - 48.1%]	0.3494	4.71	37.8	[35.4 - 40.4%]	0.107	1.54	42.7	[39.7 - 45.7%]	0.419	0.33	1.12
Bradyrhizobium sp. CF659	Bradyrhizobium_japonicum_CCBAU_15354	44.1	[40.7 - 47.5%]	0.3544	4.19	37.8	[35.4 - 40.4%]	0.107	1.54	42.2	[39.2 - 45.2%]	0.4235	0.29	1.19
Bradyrhizobium sp. CF659	Bradyrhizobium_japonicum_CCBAU_15618	45.3	[41.9 - 48.7%]	0.3444	5.29	37.9	[35.5 - 40.5%]	0.1067	1.58	43.2	[40.2 - 46.2%]	0.4143	0.39	1.1
Bradyrhizobium sp. CF659	Bradyrhizobium_japonicum_CCBAU_25435	47.1	[43.7 - 50.5%]	0.3292	7.5	37.8	[35.3 - 40.3%]	0.1072	1.52	44.7	[41.7 - 47.7%]	0.4011	0.62	1.04
Bradyrhizobium sp. CF659	Bradyrhizobium_japonicum_CCBAU_83623	44.1	[40.7 - 47.5%]	0.3543	4.2	37.9	[35.4 - 40.4%]	0.107	1.54	42.2	[39.2 - 45.2%]	0.4234	0.29	1.21
Bradyrhizobium sp. CF659	Bradyrhizobium_japonicum_E109	48.5	[45.1 - 51.9%]	0.3181	9.62	37.8	[35.3 - 40.3%]	0.1072	1.52	45.8	[42.8 - 48.9%]	0.3912	0.88	0.86
Bradyrhizobium sp. CF659	Bradyrhizobium_japonicum_FN1	48.7	[45.3 - 52.2%]	0.3164	10	37.8	[35.3 - 40.3%]	0.1071	1.52	46	[43 - 49%]	0.3896	0.93	0.83
Bradyrhizobium sp. CF659	Bradyrhizobium_japonicum_in8p8	39.4	[36.1 - 42.9%]	0.398	1.48	33.5	[31.1 - 36%]	0.1248	0.4	37.3	[34.3 - 40.3%]	0.4732	0.05	0.73
Bradyrhizobium sp. CF659	Bradyrhizobium_japonicum_Is-1	62.2	[58.5 - 65.8%]	0.227	49.91	53.6	[50.9 - 56.3%]	0.0638	30.12	61.7	[58.4 - 64.9%]	0.2763	33.19	0.52
Bradyrhizobium sp. CF659	Bradyrhizobium_japonicum_is5	39.5	[36.2 - 43%]	0.3972	1.51	33.5	[31.1 - 36%]	0.1248	0.4	37.3	[34.4 - 40.4%]	0.4725	0.05	0.73
Bradyrhizobium sp. CF659	Bradyrhizobium_japonicum_Is-34	43.7	[40.3 - 47.1%]	0.3581	3.84	37.7	[35.3 - 40.2%]	0.1075	1.48	41.8	[38.8 - 44.8%]	0.4271	0.25	1.47
Bradyrhizobium sp. CF659	Bradyrhizobium_japonicum_SEMIA_5079	46.9	[43.5 - 50.3%]	0.3309	7.23	37.8	[35.4 - 40.4%]	0.1071	1.53	44.5	[41.5 - 47.5%]	0.4025	0.6	0.97
Bradyrhizobium sp. CF659	Bradyrhizobium_japonicum_USDA_4	47.5	[44.1 - 50.9%]	0.3262	8.04	36.3	[33.9 - 38.8%]	0.1129	0.98	44.5	[41.6 - 47.6%]	0.4022	0.6	0.84
Bradyrhizobium sp. CF659	Bradyrhizobium_japonicum_USDA_6	48.6	[45.2 - 52%]	0.3177	9.7	37.8	[35.3 - 40.3%]	0.1072	1.52	45.9	[42.9 - 48.9%]	0.3909	0.89	0.85
Bradyrhizobium sp. CF659	Bradyrhizobium_japonicum_USDA_38	46.9	[43.5 - 50.4%]	0.3305	7.28	37.7	[35.3 - 40.2%]	0.1075	1.48	44.5	[41.5 - 47.5%]	0.4025	0.6	0.98
Bradyrhizobium sp. CF659	Bradyrhizobium_japonicum_USDA_122	62.2	[58.5 - 65.8%]	0.2268	50.01	53.6	[50.9 - 56.3%]	0.0638	30.18	61.8	[58.5 - 65%]	0.2761	33.33	0.52
Bradyrhizobium sp. CF659	Bradyrhizobium_japonicum_USDA_123	43.2	[39.9 - 46.7%]	0.3619	3.51	37.7	[35.3 - 40.2%]	0.1075	1.49	41.5	[38.5 - 44.5%]	0.4304	0.22	1.24
Bradyrhizobium sp. CF659	Bradyrhizobium_japonicum_USDA_124	54.5	[50.9 - 57.9%]	0.2753	23.32	38.4	[35.9 - 40.9%]	0.105	1.79	50.8	[47.7 - 53.9%]	0.3514	3.46	0.47
Bradyrhizobium sp. CF659	Bradyrhizobium_japonicum_USDA_135	44.3	[41 - 47.8%]	0.3523	4.4	36.2	[33.8 - 38.7%]	0.1132	0.96	42	[39 - 45%]	0.4257	0.27	0.55
Bradyrhizobium sp. CF659	Bradyrhizobium_jicamae_PAC68	22.7	[19.4 - 26.3%]	0.6455	0	23.5	[21.2 - 26%]	0.1861	0	21.8	[19 - 24.9%]	0.7115	0	2.12
Bradyrhizobium sp. CF659	Bradyrhizobium_liaoningense_CCBAU_05525	42.5	[39.1 - 45.9%]	0.3687	2.99	36.3	[33.8 - 38.8%]	0.1129	0.98	40.5	[37.5 - 43.5%]	0.44	0.16	0.72
Bradyrhizobium sp. CF659	Bradyrhizobium_liaoningense_CCBAU_83689	43	[39.7 - 46.5%]	0.3637	3.37	36.3	[33.8 - 38.8%]	0.1131	0.97	40.9	[38 - 44%]	0.4356	0.19	0.68
Bradyrhizobium sp. CF659	Bradyrhizobium_liaoningense_CCNWSX0360	46.1	[42.7 - 49.5%]	0.3374	6.22	35.7	[33.2 - 38.2%]	0.1154	0.81	43.2	[40.3 - 46.3%]	0.4139	0.4	0.81
Bradyrhizobium sp. CF659	Rhizobium_lupini_HPC_L_OUTGROUP	12.8	[10.1 - 16%]	0.9848	0	17.6	[15.5 - 20%]	0.2491	0	13.1	[10.8 - 15.9%]	0.9886	0	5.3
Bradyrhizobium sp. CF659	Bradyrhizobium_manausense_BR3351	38.4	[35 - 41.8%]	0.4092	1.13	32.6	[30.2 - 35.1%]	0.1289	0.29	36.2	[33.2 - 39.2%]	0.4853	0.03	1.65
Bradyrhizobium sp. CF659	Bradyrhizobium_neotropicale_BR_10247	43.1	[39.7 - 46.5%]	0.3635	3.38	32.9	[30.5 - 35.4%]	0.1275	0.32	40	[37 - 43%]	0.4447	0.14	0.92
Bradyrhizobium sp. CF659	Bradyrhizobium_oligotrophicum_S58	22.7	[19.4 - 26.3%]	0.6453	0	23.2	[20.9 - 25.6%]	0.1889	0	21.7	[19 - 24.8%]	0.7123	0	0.61
Bradyrhizobium sp. CF659	Bradyrhizobium_pachyrhizi_BR3262	24.7	[21.4 - 28.4%]	0.6027	0.01	24.3	[22 - 26.8%]	0.1795	0.01	23.5	[20.7 - 26.6%]	0.674	0	0.75
Bradyrhizobium sp. CF659	Bradyrhizobium_pachyrhizi_PAC_48	24.5	[21.2 - 28.1%]	0.6081	0.01	24.2	[21.9 - 26.7%]	0.1804	0.01	23.3	[20.5 - 26.4%]	0.6788	0	0.76
Bradyrhizobium sp. CF659	Bradyrhizobium_paxllaeri_LMTR_21	23.2	[19.9 - 26.8%]	0.6344	0	23.5	[21.2 - 26%]	0.186	0	22.2	[19.4 - 25.3%]	0.7024	0	2.03
Bradyrhizobium sp. CF659	Bradyrhizobium_retamae_Ro19	22.1	[18.8 - 25.7%]	0.6599	0	23	[20.7 - 25.5%]	0.19	0	21.2	[18.4 - 24.3%]	0.7245	0	2.65
Bradyrhizobium sp. CF659	Bradyrhizobium_sp_17-4	21.2	[17.9 - 24.8%]	0.6817	0	25.8	[23.4 - 28.3%]	0.1685	0.01	20.8	[18 - 23.8%]	0.7353	0	0.64
Bradyrhizobium sp. CF659	Bradyrhizobium_sp_Ai1a-2	22.1	[18.8 - 25.7%]	0.6594	0	23.7	[21.4 - 26.2%]	0.1844	0	21.3	[18.5 - 24.4%]	0.7222	0	1.94
Bradyrhizobium sp. CF659	Bradyrhizobium_sp_ARR65	20	[16.8 - 23.6%]	0.7119	0	22.5	[20.2 - 25%]	0.1947	0	19.5	[16.8 - 22.5%]	0.768	0	2.51
Bradyrhizobium sp. CF659	Bradyrhizobium_sp_AT1	53.2	[49.7 - 56.6%]	0.284	19.72	35.4	[33 - 37.9%]	0.1164	0.75	48.7	[45.7 - 51.8%]	0.3674	2	0.04
Bradyrhizobium sp. CF659	Bradyrhizobium_sp_BF49	48	[44.6 - 51.5%]	0.3219	8.84	35.8	[33.4 - 38.3%]	0.1149	0.84	44.8	[41.8 - 47.8%]	0.3998	0.65	0.75
Bradyrhizobium sp. CF659	Bradyrhizobium_sp_BR_10245	41.1	[37.7 - 44.5%]	0.3819	2.18	33.2	[30.8 - 35.7%]	0.1261	0.36	38.5	[35.6 - 41.6%]	0.4598	0.08	1.3
Bradyrhizobium sp. CF659	Bradyrhizobium_sp_BR_10303	23.5	[20.2 - 27.2%]	0.6274	0.01	23.8	[21.5 - 26.2%]	0.1839	0	22.5	[19.7 - 25.6%]	0.696	0	1.27
Bradyrhizobium sp. CF659	Bradyrhizobium_sp_CCBAU_15544	48.2	[44.8 - 51.6%]	0.3207	9.09	36.5	[34 - 39%]	0.1121	1.04	45.2	[42.2 - 48.2%]	0.3969	0.72	0.78
Bradyrhizobium sp. CF659	Bradyrhizobium_sp_CCBAU_15615	46.5	[43.1 - 50%]	0.3338	6.75	36.4	[34 - 38.9%]	0.1124	1.02	43.8	[40.8 - 46.8%]	0.4087	0.48	0.84
Bradyrhizobium sp. CF659	Bradyrhizobium_sp_CCBAU_15635	49.2	[45.8 - 52.6%]	0.3129	10.8	36.5	[34 - 39%]	0.1121	1.04	46	[43 - 49%]	0.3899	0.92	0.7
Bradyrhizobium sp. CF659	Bradyrhizobium_sp_CCBAU_41267	61.3	[57.6 - 64.8%]	0.2324	46.6	53.7	[51 - 56.3%]	0.0636	30.39	61	[57.7 - 64.1%]	0.2812	29.47	0.51
Bradyrhizobium sp. CF659	Bradyrhizobium_sp_CCBAU_43298	44	[40.6 - 47.4%]	0.3551	4.12	36.2	[33.8 - 38.8%]	0.1131	0.97	41.7	[38.7 - 44.7%]	0.4281	0.24	0.64
Bradyrhizobium sp. CF659	Bradyrhizobium_sp_CCGE-LA001	46	[42.6 - 49.4%]	0.338	6.13	34.9	[32.5 - 37.4%]	0.1187	0.63	42.9	[40 - 46%]	0.4166	0.36	0.95
Bradyrhizobium sp. CF659	Bradyrhizobium_sp_CCH4-A6	15.2	[12.3 - 18.7%]	0.8702	0	21.4	[19.2 - 23.8%]	0.205	0	15.3	[12.8 - 18.2%]	0.8968	0	3.62
Bradyrhizobium sp. CF659	Bradyrhizobium_sp_CCH5-F6	44.1	[40.7 - 47.5%]	0.3544	4.19	35.5	[33.1 - 38%]	0.116	0.78	41.6	[38.6 - 44.6%]	0.4293	0.23	0.4
Bradyrhizobium sp. CF659	Bradyrhizobium_sp_CCH10-C7	15.3	[12.4 - 18.8%]	0.8661	0	21.3	[19.1 - 23.7%]	0.206	0	15.4	[12.9 - 18.3%]	0.8937	0	3.8
Bradyrhizobium sp. CF659	Bradyrhizobium_sp_Cp5_3	42.3	[38.9 - 45.7%]	0.3706	2.86	32.8	[30.4 - 35.4%]	0.1277	0.32	39.4	[36.4 - 42.4%]	0.451	0.11	1.11
Bradyrhizobium sp. CF659	Bradyrhizobium_sp_DFCI-1	25	[21.7 - 28.7%]	0.5967	0.01	24.3	[22 - 26.8%]	0.1794	0.01	23.8	[20.9 - 26.9%]	0.6691	0	0.07
Bradyrhizobium sp. CF659	Bradyrhizobium_sp_DOA1	46.2	[42.8 - 49.6%]	0.3364	6.36	34.9	[32.4 - 37.4%]	0.1187	0.63	43.1	[40.1 - 46.1%]	0.4152	0.38	0.71
Bradyrhizobium sp. CF659	Bradyrhizobium_sp_DOA9	49	[45.6 - 52.4%]	0.3145	10.42	35.1	[32.7 - 37.6%]	0.1177	0.68	45.4	[42.4 - 48.4%]	0.3952	0.77	0.03
Bradyrhizobium sp. CF659	Bradyrhizobium_sp_Ec3_3	35.4	[32.1 - 39%]	0.4414	0.51	29.2	[26.8 - 31.7%]	0.1466	0.07	33	[30.1 - 36.1%]	0.5233	0.01	1.88
Bradyrhizobium sp. CF659	Bradyrhizobium_sp_G22	49.7	[46.3 - 53.2%]	0.3088	11.81	38	[35.5 - 40.5%]	0.1065	1.6	46.9	[43.9 - 49.9%]	0.3824	1.2	0.79
Bradyrhizobium sp. CF659	Bradyrhizobium_sp_Leaf396	38.6	[35.2 - 42.1%]	0.4067	1.2	33.6	[31.2 - 36.1%]	0.1244	0.41	36.6	[33.6 - 39.7%]	0.4805	0.04	0.73
Bradyrhizobium sp. CF659	Bradyrhizobium_sp_LMTR_3	23.1	[19.8 - 26.7%]	0.6367	0	23.2	[21 - 25.7%]	0.1882	0	22.1	[19.3 - 25.2%]	0.7051	0	2.25
Bradyrhizobium sp. CF659	Bradyrhizobium_sp_LTSP849	47.2	[43.8 - 50.6%]	0.3287	7.58	35.3	[32.9 - 37.8%]	0.117	0.72	44	[41 - 47%]	0.4073	0.5	1.27
Bradyrhizobium sp. CF659	Bradyrhizobium_sp_LTSP857	48.7	[45.3 - 52.1%]	0.3166	9.94	35.2	[32.8 - 37.8%]	0.1172	0.71	45.2	[42.2 - 48.2%]	0.3967	0.73	1.23
Bradyrhizobium sp. CF659	Bradyrhizobium_sp_LTSP885	24.9	[21.6 - 28.6%]	0.5986	0.01	23.9	[21.6 - 26.4%]	0.1827	0	23.6	[20.8 - 26.7%]	0.672	0	1.13
Bradyrhizobium sp. CF659	Bradyrhizobium_sp_LTSPM299	24	[20.7 - 27.7%]	0.6168	0.01	23.8	[21.5 - 26.3%]	0.1836	0	22.9	[20.1 - 26%]	0.6871	0	1.7
Bradyrhizobium sp. CF659	Bradyrhizobium_sp_OHSU_III	24.5	[21.2 - 28.1%]	0.6076	0.01	24.2	[21.9 - 26.7%]	0.1805	0.01	23.3	[20.5 - 26.4%]	0.6784	0	0.19
Bradyrhizobium sp. CF659	Bradyrhizobium_sp_ORS_278	22.4	[19.2 - 26.1%]	0.6518	0	23.4	[21.1 - 25.9%]	0.1869	0	21.5	[18.8 - 24.6%]	0.7168	0	0.99
Bradyrhizobium sp. CF659	Bradyrhizobium_sp_ORS_285	22.4	[19.1 - 26%]	0.6532	0	23.3	[21 - 25.7%]	0.188	0	21.5	[18.7 - 24.6%]	0.7184	0	0.71
Bradyrhizobium sp. CF659	Bradyrhizobium_sp_ORS_375	22.2	[19 - 25.9%]	0.656	0	23.4	[21.1 - 25.9%]	0.1868	0	21.4	[18.6 - 24.5%]	0.7203	0	0.98
Bradyrhizobium sp. CF659	Bradyrhizobium_sp_S23321	52	[48.5 - 55.5%]	0.2922	16.74	36.1	[33.6 - 38.6%]	0.1138	0.92	48.1	[45 - 51.1%]	0.3728	1.67	0.22
Bradyrhizobium sp. CF659	Bradyrhizobium_sp_STM_3809	22.9	[19.6 - 26.5%]	0.6419	0	23.8	[21.5 - 26.3%]	0.1834	0	22	[19.2 - 25%]	0.7076	0	1.67
Bradyrhizobium sp. CF659	Bradyrhizobium_sp_STM_3843	21.7	[18.4 - 25.3%]	0.6689	0	23.2	[20.9 - 25.7%]	0.1885	0	20.9	[18.2 - 24%]	0.7313	0	0.92
Bradyrhizobium sp. CF659	Bradyrhizobium_sp_th_b2	23.6	[20.3 - 27.3%]	0.6254	0.01	24.3	[22 - 26.7%]	0.1798	0.01	22.6	[19.8 - 25.7%]	0.6928	0	1.25
Bradyrhizobium sp. CF659	Bradyrhizobium_sp_Tv2a-2	21.7	[18.5 - 25.4%]	0.668	0	22.9	[20.6 - 25.4%]	0.191	0	20.9	[18.2 - 24%]	0.7314	0	2.32
Bradyrhizobium sp. CF659	Bradyrhizobium_sp_URHA0002	21.6	[18.4 - 25.2%]	0.671	0	23	[20.7 - 25.4%]	0.1904	0	20.8	[18.1 - 23.9%]	0.7336	0	2.32
Bradyrhizobium sp. CF659	Bradyrhizobium_sp_URHA0013	51	[47.5 - 54.4%]	0.2996	14.35	35.7	[33.3 - 38.3%]	0.1151	0.83	47.1	[44.1 - 50.2%]	0.3802	1.29	0.75
Bradyrhizobium sp. CF659	Bradyrhizobium_sp_URHD0069	18.4	[15.3 - 22%]	0.7577	0	22.4	[20.1 - 24.9%]	0.1956	0	18.1	[15.5 - 21.1%]	0.8051	0	3.84
Bradyrhizobium sp. CF659	Bradyrhizobium_sp_USDA_3384	44.5	[41.1 - 47.9%]	0.3509	4.54	36.2	[33.7 - 38.7%]	0.1134	0.95	42.1	[39.1 - 45.1%]	0.4245	0.28	0.95
Bradyrhizobium sp. CF659	Bradyrhizobium_sp_WSM471	46.7	[43.3 - 50.1%]	0.3326	6.94	35.8	[33.4 - 38.3%]	0.1149	0.85	43.7	[40.8 - 46.8%]	0.4093	0.47	1.11
Bradyrhizobium sp. CF659	Bradyrhizobium_sp_WSM1253	45.6	[42.2 - 49%]	0.3416	5.64	35.5	[33.1 - 38%]	0.116	0.78	42.8	[39.8 - 45.8%]	0.418	0.35	1.37
Bradyrhizobium sp. CF659	Bradyrhizobium_sp_WSM1417	45.5	[42.1 - 48.9%]	0.3422	5.57	35.7	[33.3 - 38.3%]	0.1151	0.83	42.8	[39.8 - 45.8%]	0.4179	0.35	1.35
Bradyrhizobium sp. CF659	Bradyrhizobium_sp_WSM1743	44.5	[41.1 - 47.9%]	0.3508	4.56	36.5	[34 - 39%]	0.1122	1.04	42.2	[39.2 - 45.2%]	0.4236	0.29	1.14
Bradyrhizobium sp. CF659	Bradyrhizobium_sp_WSM2254	64.7	[60.9 - 68.3%]	0.2128	58.53	61.7	[58.8 - 64.5%]	0.0487	57.82	65.8	[62.4 - 69.1%]	0.2511	54.51	0.63
Bradyrhizobium sp. CF659	Bradyrhizobium_sp_WSM2793	46.6	[43.2 - 50%]	0.3335	6.8	36	[33.5 - 38.5%]	0.1143	0.89	43.7	[40.7 - 46.7%]	0.4097	0.46	0.99
Bradyrhizobium sp. CF659	Bradyrhizobium_sp_WSM3983	42.1	[38.7 - 45.5%]	0.3727	2.71	33.9	[31.5 - 36.5%]	0.1227	0.46	39.5	[36.5 - 42.5%]	0.4497	0.11	1.54
Bradyrhizobium sp. CF659	Bradyrhizobium_sp_WSM4349	44.4	[41 - 47.8%]	0.3518	4.45	35.6	[33.2 - 38.1%]	0.1156	0.8	41.8	[38.9 - 44.9%]	0.4267	0.26	1.38
Bradyrhizobium sp. CF659	Bradyrhizobium_sp_YR681	55.6	[52 - 59%]	0.268	26.68	38.4	[36 - 40.9%]	0.1049	1.8	51.7	[48.6 - 54.7%]	0.3448	4.32	0.2
Bradyrhizobium sp. CF659	Bradyrhizobium_stylosanthis_BR_446	52.3	[48.8 - 55.7%]	0.2903	17.4	36.7	[34.3 - 39.2%]	0.1112	1.11	48.5	[45.5 - 51.5%]	0.3693	1.88	0.04
Bradyrhizobium sp. CF659	Bradyrhizobium_tropiciagri_SEMIA_6148	23.3	[20 - 27%]	0.6318	0	24.4	[22.1 - 26.9%]	0.1787	0.01	22.4	[19.6 - 25.5%]	0.6976	0	1.02
Bradyrhizobium sp. CF659	Bradyrhizobium_valentinum_LmjM3	21.4	[18.2 - 25%]	0.6753	0	23.4	[21.1 - 25.8%]	0.1872	0	20.7	[18 - 23.8%]	0.7361	0	2.6
Bradyrhizobium sp. CF659	Bradyrhizobium_valentinum_LmjM6	21.5	[18.3 - 25.1%]	0.6732	0	23.3	[21 - 25.7%]	0.188	0	20.8	[18 - 23.9%]	0.7346	0	2.63
Bradyrhizobium sp. CF659	Bradyrhizobium_viridifuturi_SEMIA_690	24.4	[21.1 - 28.1%]	0.6093	0.01	24.2	[21.9 - 26.7%]	0.1802	0.01	23.3	[20.4 - 26.4%]	0.6797	0	0.49
Bradyrhizobium sp. CF659	Bradyrhizobium_yuanmingense_BR3267	46.3	[42.9 - 49.7%]	0.336	6.43	34.8	[32.4 - 37.3%]	0.1191	0.61	43.1	[40.1 - 46.1%]	0.415	0.38	0.65
Bradyrhizobium sp. CF659	Bradyrhizobium_yuanmingense_CCBAU_05623	43.7	[40.3 - 47.1%]	0.3579	3.86	34.8	[32.4 - 37.3%]	0.1189	0.62	41.1	[38.1 - 44.1%]	0.4342	0.2	0.73
Bradyrhizobium sp. CF659	Bradyrhizobium_yuanmingense_CCBAU_25021	45.3	[41.9 - 48.7%]	0.344	5.34	34.8	[32.4 - 37.3%]	0.119	0.62	42.3	[39.4 - 45.4%]	0.4221	0.3	0.71
Bradyrhizobium sp. CF659	Bradyrhizobium_yuanmingense_CCBAU_35157	45.8	[42.4 - 49.2%]	0.3401	5.84	34.9	[32.4 - 37.4%]	0.1188	0.63	42.7	[39.8 - 45.8%]	0.4185	0.34	0.58
Bradyrhizobium sp. ERR11	Bradyrhizobium sp. Gha	38	[34.6 - 41.5%]	0.4131	1.02	31.1	[28.7 - 33.6%]	0.1361	0.17	35.5	[32.6 - 38.6%]	0.493	0.03	0.36
Bradyrhizobium sp. ERR11	Bradyrhizobium sp. Ghvi	43.3	[39.9 - 46.7%]	0.3613	3.56	31.5	[29.1 - 34%]	0.1341	0.19	39.8	[36.8 - 42.8%]	0.447	0.13	0.19
Bradyrhizobium sp. ERR11	Bradyrhizobium sp. OK095	44	[40.6 - 47.4%]	0.3555	4.09	34.2	[31.8 - 36.7%]	0.1217	0.5	41.1	[38.1 - 44.1%]	0.4339	0.2	0.66
Bradyrhizobium sp. ERR11	Bradyrhizobium sp. R5	23.6	[20.3 - 27.2%]	0.626	0.01	24.4	[22.1 - 26.9%]	0.1789	0.01	22.6	[19.8 - 25.7%]	0.6929	0	0.42
Bradyrhizobium sp. ERR11	Bradyrhizobium sp. Rc2d	47.1	[43.7 - 50.6%]	0.329	7.53	36.2	[33.8 - 38.7%]	0.1133	0.95	44.2	[41.2 - 47.3%]	0.405	0.54	0.4
Bradyrhizobium sp. ERR11	Bradyrhizobium sp. Rc3b	69	[65.1 - 72.6%]	0.189	71.63	58.7	[55.9 - 61.4%]	0.0539	47.9	68.9	[65.5 - 72.2%]	0.2328	69.48	0.45
Bradyrhizobium sp. ERR11	Bradyrhizobium yuanmingense CCBAU 10071	47.7	[44.3 - 51.1%]	0.3248	8.29	34.7	[32.3 - 37.2%]	0.1194	0.6	44.2	[41.2 - 47.2%]	0.4054	0.54	0.54
Bradyrhizobium sp. ERR11	Bradyrhizobium yuanmingense CGMCC 1.3531	47.7	[44.3 - 51.1%]	0.3246	8.32	34.7	[32.3 - 37.2%]	0.1194	0.6	44.2	[41.2 - 47.2%]	0.4053	0.54	0.55
Bradyrhizobium sp. ERR11	Mesorhizobium_ciceri_WSM1271_OUTGROUP	13.1	[10.4 - 16.4%]	0.966	0	18.8	[16.6 - 21.1%]	0.2343	0	13.5	[11.1 - 16.2%]	0.974	0	0.66
Bradyrhizobium sp. ERR11	Bradyrhizobium_diazoefficiens_SEMIA_5080	46.2	[42.8 - 49.6%]	0.3364	6.36	35.7	[33.2 - 38.2%]	0.1155	0.81	43.3	[40.3 - 46.4%]	0.413	0.41	0.75
Bradyrhizobium sp. ERR11	Bradyrhizobium_diazoefficiens_USDA_110	46	[42.6 - 49.4%]	0.3384	6.08	35.7	[33.2 - 38.2%]	0.1154	0.81	43.1	[40.2 - 46.2%]	0.4148	0.39	0.83
Bradyrhizobium sp. ERR11	Bradyrhizobium_elkanii_587	21.2	[17.9 - 24.8%]	0.6817	0	25	[22.7 - 27.5%]	0.1738	0.01	20.7	[17.9 - 23.7%]	0.737	0	0.42
Bradyrhizobium sp. ERR11	Bradyrhizobium_elkanii_BLY3-8	23.5	[20.2 - 27.1%]	0.6291	0.01	24.2	[21.9 - 26.7%]	0.1805	0.01	22.5	[19.7 - 25.6%]	0.696	0	0.58
Bradyrhizobium sp. ERR11	Bradyrhizobium_elkanii_BLY6-1	23.5	[20.2 - 27.1%]	0.6286	0.01	24.2	[21.9 - 26.6%]	0.1805	0.01	22.5	[19.7 - 25.6%]	0.6956	0	0.58
Bradyrhizobium sp. ERR11	Bradyrhizobium_elkanii_CCBAU_05737	22.5	[19.3 - 26.2%]	0.6495	0	24.5	[22.2 - 27%]	0.1777	0.01	21.8	[19 - 24.9%]	0.7118	0	0.28
Bradyrhizobium sp. ERR11	Bradyrhizobium_elkanii_CCBAU_43297	23	[19.7 - 26.6%]	0.6389	0	24.5	[22.2 - 27%]	0.1781	0.01	22.2	[19.4 - 25.2%]	0.7032	0	0.52
Bradyrhizobium sp. ERR11	Bradyrhizobium_elkanii_UASWS1015	22.6	[19.3 - 26.2%]	0.6484	0	23.8	[21.5 - 26.3%]	0.1836	0	21.7	[18.9 - 24.8%]	0.7129	0	1.41
Bradyrhizobium sp. ERR11	Bradyrhizobium_elkanii_USDA_76	23.5	[20.2 - 27.2%]	0.6274	0.01	24.2	[21.9 - 26.7%]	0.18	0.01	22.6	[19.7 - 25.6%]	0.6945	0	0.49
Bradyrhizobium sp. ERR11	Bradyrhizobium_elkanii_USDA_94	23.5	[20.2 - 27.2%]	0.6271	0.01	24.3	[22 - 26.8%]	0.1795	0.01	22.6	[19.8 - 25.7%]	0.694	0	0.52
Bradyrhizobium sp. ERR11	Bradyrhizobium_elkanii_USDA_3254	23.9	[20.6 - 27.6%]	0.6193	0.01	24.3	[22 - 26.7%]	0.1798	0.01	22.9	[20.1 - 26%]	0.6878	0	0.56
Bradyrhizobium sp. ERR11	Bradyrhizobium_elkanii_USDA_3259	24.1	[20.8 - 27.7%]	0.6156	0.01	24.3	[22 - 26.7%]	0.1798	0.01	23	[20.2 - 26.1%]	0.6848	0	0.69
Bradyrhizobium sp. ERR11	Bradyrhizobium_elkanii_WSM1741	21.5	[18.3 - 25.1%]	0.673	0	22.7	[20.4 - 25.2%]	0.1927	0	20.7	[18 - 23.8%]	0.736	0	1.13
Bradyrhizobium sp. ERR11	Bradyrhizobium_elkanii_WSM2783	21.1	[17.9 - 24.7%]	0.6836	0	23.5	[21.2 - 25.9%]	0.1863	0	20.5	[17.7 - 23.5%]	0.7426	0	0.87
Bradyrhizobium sp. ERR11	Bradyrhizobium_embrapense_SEMIA_6208	23.8	[20.5 - 27.4%]	0.6218	0.01	23.9	[21.6 - 26.3%]	0.1831	0	22.7	[19.9 - 25.8%]	0.6911	0	0.75
Bradyrhizobium sp. ERR11	Bradyrhizobium_icense_LMTR_13	21.7	[18.5 - 25.4%]	0.6674	0	22.9	[20.6 - 25.3%]	0.1914	0	20.9	[18.2 - 24%]	0.7311	0	1.2
Bradyrhizobium sp. ERR11	Bradyrhizobium_japonicum_22	43.3	[39.9 - 46.7%]	0.3618	3.52	38.2	[35.7 - 40.7%]	0.1058	1.69	41.6	[38.6 - 44.6%]	0.4293	0.23	1.3
Bradyrhizobium sp. ERR11	Bradyrhizobium_japonicum_CCBA_15517	40.5	[37.2 - 44%]	0.3872	1.92	35.4	[32.9 - 37.9%]	0.1166	0.74	38.6	[35.7 - 41.7%]	0.4587	0.08	0.17
Bradyrhizobium sp. ERR11	Bradyrhizobium_japonicum_CCBAU_15354	40	[36.7 - 43.5%]	0.3922	1.7	35.5	[33 - 38%]	0.1163	0.76	38.2	[35.3 - 41.3%]	0.4629	0.07	0.11
Bradyrhizobium sp. ERR11	Bradyrhizobium_japonicum_CCBAU_15618	42.9	[39.5 - 46.3%]	0.365	3.26	35.4	[32.9 - 37.9%]	0.1166	0.74	40.6	[37.6 - 43.6%]	0.439	0.17	0.19
Bradyrhizobium sp. ERR11	Bradyrhizobium_japonicum_CCBAU_25435	44.1	[40.8 - 47.6%]	0.3539	4.24	35.5	[33.1 - 38%]	0.1161	0.77	41.6	[38.6 - 44.7%]	0.4289	0.24	0.26
Bradyrhizobium sp. ERR11	Bradyrhizobium_japonicum_CCBAU_83623	40	[36.7 - 43.5%]	0.3922	1.7	35.4	[33 - 38%]	0.1163	0.76	38.2	[35.3 - 41.3%]	0.463	0.07	0.08
Bradyrhizobium sp. ERR11	Bradyrhizobium_japonicum_E109	44.6	[41.2 - 48%]	0.3504	4.6	35.4	[32.9 - 37.9%]	0.1166	0.74	41.9	[38.9 - 44.9%]	0.4261	0.26	0.43
Bradyrhizobium sp. ERR11	Bradyrhizobium_japonicum_FN1	44.7	[41.4 - 48.2%]	0.3489	4.77	35.4	[32.9 - 37.9%]	0.1167	0.74	42	[39.1 - 45.1%]	0.4249	0.27	0.46
Bradyrhizobium sp. ERR11	Bradyrhizobium_japonicum_in8p8	40.2	[36.8 - 43.6%]	0.3907	1.76	33.9	[31.4 - 36.4%]	0.1231	0.45	38	[35 - 41%]	0.4657	0.07	0.56
Bradyrhizobium sp. ERR11	Bradyrhizobium_japonicum_Is-1	46.6	[43.2 - 50%]	0.3335	6.8	35.6	[33.2 - 38.2%]	0.1155	0.81	43.6	[40.6 - 46.6%]	0.4105	0.45	0.77
Bradyrhizobium sp. ERR11	Bradyrhizobium_japonicum_is5	40.2	[36.9 - 43.7%]	0.3901	1.79	33.9	[31.4 - 36.4%]	0.1231	0.45	38	[35.1 - 41.1%]	0.4652	0.07	0.56
Bradyrhizobium sp. ERR11	Bradyrhizobium_japonicum_Is-34	41.5	[38.2 - 45%]	0.3775	2.42	35.2	[32.8 - 37.8%]	0.1172	0.71	39.4	[36.5 - 42.5%]	0.4505	0.11	0.18
Bradyrhizobium sp. ERR11	Bradyrhizobium_japonicum_SEMIA_5079	44.2	[40.8 - 47.6%]	0.3534	4.29	35.3	[32.9 - 37.8%]	0.117	0.72	41.6	[38.6 - 44.6%]	0.429	0.24	0.32
Bradyrhizobium sp. ERR11	Bradyrhizobium_japonicum_USDA_4	63.1	[59.3 - 66.7%]	0.2219	53.03	58.1	[55.3 - 60.8%]	0.0551	45.76	63.6	[60.3 - 66.8%]	0.2647	42.69	0.45
Bradyrhizobium sp. ERR11	Bradyrhizobium_japonicum_USDA_6	44.6	[41.2 - 48%]	0.35	4.64	35.4	[32.9 - 37.9%]	0.1166	0.74	41.9	[39 - 45%]	0.4258	0.26	0.44
Bradyrhizobium sp. ERR11	Bradyrhizobium_japonicum_USDA_38	43.6	[40.2 - 47%]	0.3592	3.74	35.3	[32.9 - 37.8%]	0.1168	0.73	41.1	[38.1 - 44.1%]	0.434	0.2	0.31
Bradyrhizobium sp. ERR11	Bradyrhizobium_japonicum_USDA_122	46.6	[43.3 - 50.1%]	0.333	6.89	35.7	[33.2 - 38.2%]	0.1154	0.81	43.7	[40.7 - 46.7%]	0.41	0.46	0.77
Bradyrhizobium sp. ERR11	Bradyrhizobium_japonicum_USDA_123	40.2	[36.8 - 43.7%]	0.3905	1.77	35.2	[32.8 - 37.7%]	0.1174	0.7	38.3	[35.3 - 41.4%]	0.462	0.07	0.05
Bradyrhizobium sp. ERR11	Bradyrhizobium_japonicum_USDA_124	48.1	[44.6 - 51.5%]	0.3217	8.88	35.6	[33.2 - 38.2%]	0.1155	0.8	44.8	[41.8 - 47.8%]	0.4001	0.65	0.82
Bradyrhizobium sp. ERR11	Bradyrhizobium_japonicum_USDA_135	43.6	[40.2 - 47%]	0.3587	3.78	36.4	[33.9 - 38.9%]	0.1125	1.01	41.4	[38.4 - 44.4%]	0.4309	0.22	0.74
Bradyrhizobium sp. ERR11	Bradyrhizobium_jicamae_PAC68	21.5	[18.3 - 25.1%]	0.6732	0	23.2	[20.9 - 25.7%]	0.1886	0	20.8	[18 - 23.8%]	0.7349	0	0.83
Bradyrhizobium sp. ERR11	Bradyrhizobium_liaoningense_CCBAU_05525	42.4	[39.1 - 45.9%]	0.3691	2.96	36.6	[34.1 - 39.1%]	0.1119	1.06	40.5	[37.5 - 43.5%]	0.4397	0.16	0.57
Bradyrhizobium sp. ERR11	Bradyrhizobium_liaoningense_CCBAU_83689	42.6	[39.3 - 46.1%]	0.3673	3.09	36.6	[34.2 - 39.1%]	0.1117	1.08	40.7	[37.7 - 43.7%]	0.438	0.17	0.61
Bradyrhizobium sp. ERR11	Bradyrhizobium_liaoningense_CCNWSX0360	44.2	[40.8 - 47.6%]	0.3537	4.25	36.1	[33.7 - 38.7%]	0.1135	0.94	41.8	[38.8 - 44.8%]	0.4271	0.25	0.48
Bradyrhizobium sp. ERR11	Rhizobium_lupini_HPC_L_OUTGROUP	12.7	[10 - 16%]	0.9879	0	17.6	[15.5 - 20%]	0.249	0	13.1	[10.7 - 15.8%]	0.9909	0	4.01
Bradyrhizobium sp. ERR11	Bradyrhizobium_manausense_BR3351	36	[32.7 - 39.5%]	0.4348	0.6	31.1	[28.7 - 33.6%]	0.1362	0.17	33.9	[31 - 37%]	0.5118	0.01	0.36
Bradyrhizobium sp. ERR11	Bradyrhizobium_neotropicale_BR_10247	38.9	[35.6 - 42.4%]	0.4032	1.3	31.3	[28.9 - 33.8%]	0.1352	0.18	36.3	[33.3 - 39.4%]	0.4839	0.03	0.37
Bradyrhizobium sp. ERR11	Bradyrhizobium_oligotrophicum_S58	21	[17.8 - 24.6%]	0.6858	0	22.9	[20.6 - 25.3%]	0.1914	0	20.3	[17.6 - 23.4%]	0.746	0	1.9
Bradyrhizobium sp. ERR11	Bradyrhizobium_pachyrhizi_BR3262	23.5	[20.2 - 27.2%]	0.6276	0.01	24.2	[21.9 - 26.7%]	0.1801	0.01	22.6	[19.7 - 25.6%]	0.6947	0	0.54
Bradyrhizobium sp. ERR11	Bradyrhizobium_pachyrhizi_PAC_48	23.8	[20.5 - 27.5%]	0.6208	0.01	24.2	[21.9 - 26.7%]	0.1804	0.01	22.8	[20 - 25.9%]	0.6892	0	0.54
Bradyrhizobium sp. ERR11	Bradyrhizobium_paxllaeri_LMTR_21	22.1	[18.9 - 25.8%]	0.658	0	23.2	[20.9 - 25.7%]	0.1886	0	21.3	[18.5 - 24.4%]	0.7225	0	0.73
Bradyrhizobium sp. ERR11	Bradyrhizobium_retamae_Ro19	21.2	[17.9 - 24.8%]	0.6817	0	22.7	[20.4 - 25.2%]	0.1929	0	20.4	[17.7 - 23.5%]	0.7431	0	1.36
Bradyrhizobium sp. ERR11	Bradyrhizobium_sp_17-4	19.9	[16.7 - 23.5%]	0.7153	0	25.2	[22.9 - 27.7%]	0.1725	0.01	19.6	[16.9 - 22.6%]	0.7644	0	0.65
Bradyrhizobium sp. ERR11	Bradyrhizobium_sp_Ai1a-2	21.3	[18.1 - 24.9%]	0.6783	0	23.5	[21.2 - 25.9%]	0.1862	0	20.6	[17.9 - 23.7%]	0.7382	0	0.65
Bradyrhizobium sp. ERR11	Bradyrhizobium_sp_ARR65	18.9	[15.8 - 22.5%]	0.7431	0	22.3	[20 - 24.7%]	0.1966	0	18.5	[15.9 - 21.5%]	0.7936	0	1.22
Bradyrhizobium sp. ERR11	Bradyrhizobium_sp_AT1	51.2	[47.8 - 54.7%]	0.2978	14.89	39	[36.5 - 41.5%]	0.1029	2.09	48.4	[45.3 - 51.4%]	0.3701	1.83	1.33
Bradyrhizobium sp. ERR11	Bradyrhizobium_sp_BF49	45.2	[41.8 - 48.7%]	0.3447	5.26	34.1	[31.6 - 36.6%]	0.1222	0.48	42.1	[39.1 - 45.1%]	0.4248	0.27	0.55
Bradyrhizobium sp. ERR11	Bradyrhizobium_sp_BR_10245	35.6	[32.2 - 39.1%]	0.4402	0.53	31.4	[29 - 33.9%]	0.1348	0.18	33.6	[30.7 - 36.7%]	0.5156	0.01	0.01
Bradyrhizobium sp. ERR11	Bradyrhizobium_sp_BR_10303	22.6	[19.4 - 26.3%]	0.6471	0	23.7	[21.4 - 26.1%]	0.1847	0	21.7	[19 - 24.8%]	0.7123	0	0.02
Bradyrhizobium sp. ERR11	Bradyrhizobium_sp_CCBAU_15544	62.2	[58.5 - 65.8%]	0.2269	49.97	58.5	[55.7 - 61.3%]	0.0542	47.36	62.9	[59.6 - 66.1%]	0.2688	39.24	0.51
Bradyrhizobium sp. ERR11	Bradyrhizobium_sp_CCBAU_15615	60.3	[56.7 - 63.9%]	0.2379	43.27	58.5	[55.7 - 61.2%]	0.0543	47.18	61.3	[58 - 64.4%]	0.2792	30.93	0.45
Bradyrhizobium sp. ERR11	Bradyrhizobium_sp_CCBAU_15635	63.6	[59.8 - 67.2%]	0.2189	54.82	58.7	[55.9 - 61.5%]	0.0539	48.05	64.2	[60.9 - 67.4%]	0.261	45.9	0.59
Bradyrhizobium sp. ERR11	Bradyrhizobium_sp_CCBAU_41267	45.1	[41.8 - 48.6%]	0.3454	5.17	35.7	[33.3 - 38.2%]	0.1152	0.83	42.5	[39.5 - 45.5%]	0.4208	0.31	0.78
Bradyrhizobium sp. ERR11	Bradyrhizobium_sp_CCBAU_43298	47.2	[43.8 - 50.6%]	0.3287	7.59	36.5	[34.1 - 39.1%]	0.112	1.06	44.4	[41.4 - 47.4%]	0.4038	0.57	0.65
Bradyrhizobium sp. ERR11	Bradyrhizobium_sp_CCGE-LA001	48.1	[44.7 - 51.5%]	0.3215	8.93	34.6	[32.2 - 37.1%]	0.1199	0.57	44.5	[41.5 - 47.5%]	0.4029	0.59	0.34
Bradyrhizobium sp. ERR11	Bradyrhizobium_sp_CCH4-A6	15.3	[12.4 - 18.7%]	0.8686	0	21	[18.7 - 23.4%]	0.2095	0	15.4	[12.9 - 18.2%]	0.8961	0	2.33
Bradyrhizobium sp. ERR11	Bradyrhizobium_sp_CCH5-F6	41.5	[38.2 - 45%]	0.3775	2.42	35.5	[33.1 - 38%]	0.116	0.78	39.5	[36.5 - 42.5%]	0.4497	0.11	0.89
Bradyrhizobium sp. ERR11	Bradyrhizobium_sp_CCH10-C7	15.2	[12.3 - 18.6%]	0.8723	0	20.9	[18.6 - 23.3%]	0.2104	0	15.3	[12.8 - 18.2%]	0.8992	0	2.51
Bradyrhizobium sp. ERR11	Bradyrhizobium_sp_Cp5_3	38.1	[34.8 - 41.6%]	0.4117	1.06	31.4	[28.9 - 33.9%]	0.135	0.18	35.7	[32.7 - 38.7%]	0.4911	0.03	0.18
Bradyrhizobium sp. ERR11	Bradyrhizobium_sp_DFCI-1	23	[19.7 - 26.7%]	0.6386	0	23.9	[21.6 - 26.3%]	0.183	0	22.1	[19.3 - 25.2%]	0.7048	0	1.22
Bradyrhizobium sp. ERR11	Bradyrhizobium_sp_DOA1	47	[43.6 - 50.5%]	0.3298	7.4	34.8	[32.4 - 37.4%]	0.1189	0.62	43.7	[40.7 - 46.8%]	0.4095	0.47	0.58
Bradyrhizobium sp. ERR11	Bradyrhizobium_sp_DOA9	44.9	[41.6 - 48.4%]	0.3472	4.96	35.7	[33.2 - 38.2%]	0.1154	0.81	42.3	[39.3 - 45.3%]	0.4225	0.3	1.26
Bradyrhizobium sp. ERR11	Bradyrhizobium_sp_Ec3_3	30.7	[27.3 - 34.3%]	0.503	0.11	28.1	[25.7 - 30.6%]	0.1533	0.04	29	[26.1 - 32.1%]	0.5792	0	0.59
Bradyrhizobium sp. ERR11	Bradyrhizobium_sp_G22	43.4	[40 - 46.8%]	0.3609	3.59	35.4	[32.9 - 37.9%]	0.1167	0.74	40.9	[38 - 44%]	0.4355	0.19	0.5
Bradyrhizobium sp. ERR11	Bradyrhizobium_sp_Leaf396	39.1	[35.8 - 42.6%]	0.4011	1.37	33.9	[31.5 - 36.4%]	0.123	0.46	37.1	[34.2 - 40.2%]	0.4747	0.05	0.56
Bradyrhizobium sp. ERR11	Bradyrhizobium_sp_LMTR_3	21.9	[18.7 - 25.5%]	0.6638	0	22.9	[20.6 - 25.4%]	0.191	0	21.1	[18.3 - 24.1%]	0.728	0	0.96
Bradyrhizobium sp. ERR11	Bradyrhizobium_sp_LTSP849	37.9	[34.5 - 41.4%]	0.4142	1	32.4	[30 - 34.9%]	0.1297	0.27	35.7	[32.8 - 38.8%]	0.4902	0.03	0.02
Bradyrhizobium sp. ERR11	Bradyrhizobium_sp_LTSP857	38.4	[35 - 41.9%]	0.409	1.13	32.4	[29.9 - 34.9%]	0.13	0.27	36.1	[33.2 - 39.2%]	0.4859	0.03	0.06
Bradyrhizobium sp. ERR11	Bradyrhizobium_sp_LTSP885	23	[19.7 - 26.6%]	0.6386	0	23.4	[21.1 - 25.8%]	0.1871	0	22	[19.2 - 25.1%]	0.7062	0	0.16
Bradyrhizobium sp. ERR11	Bradyrhizobium_sp_LTSPM299	21.7	[18.4 - 25.3%]	0.6688	0	23.4	[21.1 - 25.8%]	0.1873	0	20.9	[18.2 - 24%]	0.7308	0	0.41
Bradyrhizobium sp. ERR11	Bradyrhizobium_sp_OHSU_III	22.8	[19.5 - 26.4%]	0.644	0	23.8	[21.5 - 26.3%]	0.1836	0	21.9	[19.1 - 25%]	0.7093	0	1.48
Bradyrhizobium sp. ERR11	Bradyrhizobium_sp_ORS_278	20.7	[17.5 - 24.3%]	0.6934	0	23	[20.7 - 25.4%]	0.1906	0	20.1	[17.4 - 23.1%]	0.7519	0	2.28
Bradyrhizobium sp. ERR11	Bradyrhizobium_sp_ORS_285	21.1	[17.9 - 24.7%]	0.6832	0	22.9	[20.6 - 25.4%]	0.1911	0	20.4	[17.7 - 23.5%]	0.7437	0	2.01
Bradyrhizobium sp. ERR11	Bradyrhizobium_sp_ORS_375	20.8	[17.6 - 24.5%]	0.6894	0	23.2	[20.9 - 25.6%]	0.1887	0	20.2	[17.5 - 23.3%]	0.7481	0	2.27
Bradyrhizobium sp. ERR11	Bradyrhizobium_sp_S23321	44.9	[41.5 - 48.3%]	0.3476	4.91	34	[31.6 - 36.5%]	0.1224	0.48	41.8	[38.8 - 44.8%]	0.4274	0.25	1.07
Bradyrhizobium sp. ERR11	Bradyrhizobium_sp_STM_3809	21	[17.8 - 24.7%]	0.6849	0	23.4	[21.1 - 25.9%]	0.1869	0	20.4	[17.7 - 23.5%]	0.7438	0	2.96
Bradyrhizobium sp. ERR11	Bradyrhizobium_sp_STM_3843	19.9	[16.7 - 23.5%]	0.7139	0	22.8	[20.5 - 25.2%]	0.1921	0	19.4	[16.7 - 22.5%]	0.7689	0	0.37
Bradyrhizobium sp. ERR11	Bradyrhizobium_sp_th_b2	22.5	[19.2 - 26.1%]	0.6505	0	24	[21.7 - 26.4%]	0.1822	0	21.7	[18.9 - 24.7%]	0.7142	0	0.04
Bradyrhizobium sp. ERR11	Bradyrhizobium_sp_Tv2a-2	20.4	[17.2 - 24%]	0.7015	0	22.8	[20.6 - 25.3%]	0.1917	0	19.8	[17.1 - 22.9%]	0.7587	0	1.03
Bradyrhizobium sp. ERR11	Bradyrhizobium_sp_URHA0002	20.9	[17.7 - 24.5%]	0.6891	0	22.7	[20.5 - 25.2%]	0.1926	0	20.2	[17.5 - 23.3%]	0.749	0	1.03
Bradyrhizobium sp. ERR11	Bradyrhizobium_sp_URHA0013	47.8	[44.4 - 51.2%]	0.3236	8.52	34.1	[31.6 - 36.6%]	0.1222	0.48	44.1	[41.1 - 47.1%]	0.4063	0.52	0.54
Bradyrhizobium sp. ERR11	Bradyrhizobium_sp_URHD0069	17.7	[14.6 - 21.2%]	0.7811	0	22.1	[19.9 - 24.6%]	0.1982	0	17.5	[14.9 - 20.5%]	0.8245	0	2.55
Bradyrhizobium sp. ERR11	Bradyrhizobium_sp_USDA_3384	45.6	[42.2 - 49%]	0.3419	5.61	35.3	[32.9 - 37.8%]	0.1169	0.72	42.7	[39.7 - 45.7%]	0.4188	0.34	0.34
Bradyrhizobium sp. ERR11	Bradyrhizobium_sp_WSM471	44.9	[41.5 - 48.3%]	0.3476	4.91	34.2	[31.7 - 36.7%]	0.1218	0.5	41.8	[38.8 - 44.8%]	0.4271	0.25	0.18
Bradyrhizobium sp. ERR11	Bradyrhizobium_sp_WSM1253	45.7	[42.3 - 49.1%]	0.341	5.73	33.5	[31.1 - 36%]	0.1245	0.4	42.2	[39.3 - 45.3%]	0.423	0.29	0.08
Bradyrhizobium sp. ERR11	Bradyrhizobium_sp_WSM1417	44.3	[40.9 - 47.7%]	0.3525	4.38	33.9	[31.5 - 36.4%]	0.1228	0.46	41.3	[38.3 - 44.3%]	0.4321	0.21	0.06
Bradyrhizobium sp. ERR11	Bradyrhizobium_sp_WSM1743	51.4	[48 - 54.9%]	0.2965	15.33	36.4	[34 - 38.9%]	0.1125	1.01	47.7	[44.7 - 50.7%]	0.3756	1.51	0.16
Bradyrhizobium sp. ERR11	Bradyrhizobium_sp_WSM2254	43.8	[40.4 - 47.2%]	0.357	3.94	35.7	[33.2 - 38.2%]	0.1153	0.82	41.4	[38.4 - 44.4%]	0.4311	0.22	0.66
Bradyrhizobium sp. ERR11	Bradyrhizobium_sp_WSM2793	66	[62.1 - 69.6%]	0.2053	62.88	58.7	[55.9 - 61.5%]	0.0539	47.92	66.3	[62.9 - 69.5%]	0.2482	57.06	0.3
Bradyrhizobium sp. ERR11	Bradyrhizobium_sp_WSM3983	37.8	[34.5 - 41.3%]	0.4147	0.99	32.4	[30 - 35%]	0.1296	0.27	35.7	[32.8 - 38.8%]	0.4906	0.03	0.25
Bradyrhizobium sp. ERR11	Bradyrhizobium_sp_WSM4349	44.8	[41.4 - 48.2%]	0.3484	4.82	33.7	[31.2 - 36.2%]	0.124	0.42	41.6	[38.6 - 44.6%]	0.4292	0.23	0.09
Bradyrhizobium sp. ERR11	Bradyrhizobium_sp_YR681	44.5	[41.1 - 47.9%]	0.3509	4.55	35.1	[32.7 - 37.6%]	0.1176	0.69	41.8	[38.8 - 44.8%]	0.4272	0.25	1.5
Bradyrhizobium sp. ERR11	Bradyrhizobium_stylosanthis_BR_446	44.9	[41.5 - 48.3%]	0.3473	4.95	35.1	[32.6 - 37.6%]	0.1179	0.67	42.1	[39.1 - 45.1%]	0.4242	0.28	1.33
Bradyrhizobium sp. ERR11	Bradyrhizobium_tropiciagri_SEMIA_6148	22.8	[19.5 - 26.5%]	0.6427	0	24.2	[21.9 - 26.7%]	0.18	0.01	22	[19.2 - 25.1%]	0.707	0	0.27
Bradyrhizobium sp. ERR11	Bradyrhizobium_valentinum_LmjM3	20.5	[17.3 - 24.1%]	0.6997	0	23	[20.8 - 25.5%]	0.1899	0	19.9	[17.2 - 22.9%]	0.7567	0	1.3
Bradyrhizobium sp. ERR11	Bradyrhizobium_valentinum_LmjM6	20.5	[17.3 - 24.1%]	0.6982	0	22.9	[20.7 - 25.4%]	0.1909	0	19.9	[17.2 - 23%]	0.7558	0	1.34
Bradyrhizobium sp. ERR11	Bradyrhizobium_viridifuturi_SEMIA_690	23.7	[20.4 - 27.3%]	0.6246	0.01	24	[21.7 - 26.5%]	0.1818	0	22.6	[19.8 - 25.7%]	0.6929	0	0.8
Bradyrhizobium sp. ERR11	Bradyrhizobium_yuanmingense_BR3267	52.6	[49.1 - 56.1%]	0.2881	18.2	35.1	[32.6 - 37.6%]	0.1179	0.67	48.1	[45.1 - 51.2%]	0.372	1.71	0.64
Bradyrhizobium sp. ERR11	Bradyrhizobium_yuanmingense_CCBAU_05623	47.1	[43.7 - 50.5%]	0.3292	7.51	34.8	[32.4 - 37.3%]	0.1191	0.62	43.8	[40.8 - 46.8%]	0.409	0.47	0.56
Bradyrhizobium sp. ERR11	Bradyrhizobium_yuanmingense_CCBAU_25021	47.8	[44.4 - 51.2%]	0.3239	8.45	34.7	[32.3 - 37.3%]	0.1192	0.61	44.3	[41.3 - 47.3%]	0.4045	0.55	0.58
Bradyrhizobium sp. ERR11	Bradyrhizobium_yuanmingense_CCBAU_35157	48.3	[44.9 - 51.7%]	0.3197	9.28	34.7	[32.3 - 37.3%]	0.1192	0.61	44.7	[41.7 - 47.7%]	0.4009	0.63	0.71
Bradyrhizobium sp. Gha	Bradyrhizobium sp. Ghvi	48.3	[44.9 - 51.7%]	0.32	9.22	34.3	[31.9 - 36.8%]	0.1212	0.52	44.5	[41.5 - 47.5%]	0.4025	0.6	0.16
Bradyrhizobium sp. Gha	Bradyrhizobium sp. OK095	36.5	[33.2 - 40.1%]	0.4288	0.7	31.8	[29.4 - 34.3%]	0.1326	0.22	34.5	[31.6 - 37.6%]	0.5046	0.02	1.02
Bradyrhizobium sp. Gha	Bradyrhizobium sp. R5	22.6	[19.4 - 26.3%]	0.6465	0	24.4	[22 - 26.8%]	0.1791	0.01	21.9	[19.1 - 24.9%]	0.7098	0	0.78
Bradyrhizobium sp. Gha	Bradyrhizobium sp. Rc2d	36.6	[33.2 - 40.1%]	0.4283	0.71	31.3	[28.9 - 33.8%]	0.1351	0.18	34.4	[31.5 - 37.5%]	0.5056	0.02	0.04
Bradyrhizobium sp. Gha	Bradyrhizobium sp. Rc3b	38.7	[35.4 - 42.2%]	0.4052	1.24	31.2	[28.8 - 33.8%]	0.1355	0.17	36.1	[33.2 - 39.2%]	0.4858	0.03	0.81
Bradyrhizobium sp. Gha	Bradyrhizobium yuanmingense CCBAU 10071	36.7	[33.3 - 40.2%]	0.427	0.73	30.1	[27.7 - 32.6%]	0.1414	0.11	34.2	[31.3 - 37.3%]	0.508	0.01	0.9
Bradyrhizobium sp. Gha	Bradyrhizobium yuanmingense CGMCC 1.3531	36.7	[33.3 - 40.2%]	0.4271	0.73	30.1	[27.7 - 32.6%]	0.1414	0.11	34.2	[31.3 - 37.3%]	0.5081	0.01	0.9
Bradyrhizobium sp. Gha	Mesorhizobium_ciceri_WSM1271_OUTGROUP	13.1	[10.4 - 16.4%]	0.9657	0	18.4	[16.3 - 20.8%]	0.2383	0	13.5	[11.1 - 16.2%]	0.9739	0	0.31
Bradyrhizobium sp. Gha	Bradyrhizobium_diazoefficiens_SEMIA_5080	36.6	[33.2 - 40.1%]	0.4285	0.71	31.8	[29.4 - 34.3%]	0.1328	0.21	34.5	[31.6 - 37.6%]	0.5044	0.02	1.11
Bradyrhizobium sp. Gha	Bradyrhizobium_diazoefficiens_USDA_110	36.8	[33.4 - 40.3%]	0.4262	0.74	31.8	[29.4 - 34.3%]	0.1328	0.22	34.7	[31.8 - 37.8%]	0.5024	0.02	1.19
Bradyrhizobium sp. Gha	Bradyrhizobium_elkanii_587	20.4	[17.2 - 24.1%]	0.7001	0	24.7	[22.4 - 27.2%]	0.1765	0.01	20	[17.3 - 23.1%]	0.753	0	0.77
Bradyrhizobium sp. Gha	Bradyrhizobium_elkanii_BLY3-8	22.3	[19 - 25.9%]	0.6543	0	23.9	[21.6 - 26.3%]	0.1831	0	21.5	[18.7 - 24.6%]	0.7176	0	0.94
Bradyrhizobium sp. Gha	Bradyrhizobium_elkanii_BLY6-1	22.3	[19.1 - 26%]	0.6538	0	23.9	[21.5 - 26.3%]	0.1831	0	21.5	[18.7 - 24.6%]	0.7172	0	0.94
Bradyrhizobium sp. Gha	Bradyrhizobium_elkanii_CCBAU_05737	21.8	[18.6 - 25.4%]	0.6657	0	24.2	[21.9 - 26.7%]	0.1803	0.01	21.2	[18.4 - 24.2%]	0.726	0	0.64
Bradyrhizobium sp. Gha	Bradyrhizobium_elkanii_CCBAU_43297	21.9	[18.7 - 25.6%]	0.6626	0	24.2	[21.9 - 26.6%]	0.1806	0.01	21.3	[18.5 - 24.3%]	0.7235	0	0.88
Bradyrhizobium sp. Gha	Bradyrhizobium_elkanii_UASWS1015	22.1	[18.9 - 25.8%]	0.6581	0	23.5	[21.2 - 25.9%]	0.1863	0	21.3	[18.6 - 24.4%]	0.7218	0	1.77
Bradyrhizobium sp. Gha	Bradyrhizobium_elkanii_USDA_76	22.5	[19.2 - 26.1%]	0.6505	0	24.2	[21.8 - 26.6%]	0.1807	0.01	21.7	[18.9 - 24.8%]	0.7137	0	0.85
Bradyrhizobium sp. Gha	Bradyrhizobium_elkanii_USDA_94	21.9	[18.7 - 25.6%]	0.663	0	24	[21.7 - 26.5%]	0.1819	0	21.2	[18.5 - 24.3%]	0.7243	0	0.88
Bradyrhizobium sp. Gha	Bradyrhizobium_elkanii_USDA_3254	22.4	[19.1 - 26%]	0.6524	0	24	[21.7 - 26.5%]	0.1818	0.01	21.6	[18.8 - 24.7%]	0.7156	0	0.91
Bradyrhizobium sp. Gha	Bradyrhizobium_elkanii_USDA_3259	22.6	[19.3 - 26.2%]	0.6487	0	24	[21.7 - 26.5%]	0.182	0	21.7	[18.9 - 24.8%]	0.7126	0	1.04
Bradyrhizobium sp. Gha	Bradyrhizobium_elkanii_WSM1741	19.9	[16.7 - 23.5%]	0.7156	0	22.4	[20.1 - 24.8%]	0.1958	0	19.3	[16.6 - 22.4%]	0.7713	0	0.77
Bradyrhizobium sp. Gha	Bradyrhizobium_elkanii_WSM2783	20	[16.8 - 23.6%]	0.7111	0	23.2	[20.9 - 25.7%]	0.1885	0	19.6	[16.8 - 22.6%]	0.7656	0	0.52
Bradyrhizobium sp. Gha	Bradyrhizobium_embrapense_SEMIA_6208	23.4	[20.1 - 27%]	0.6303	0.01	23.4	[21.1 - 25.8%]	0.1872	0	22.3	[19.5 - 25.4%]	0.6995	0	1.11
Bradyrhizobium sp. Gha	Bradyrhizobium_icense_LMTR_13	19.9	[16.8 - 23.6%]	0.713	0	22.5	[20.2 - 24.9%]	0.1952	0	19.4	[16.7 - 22.5%]	0.769	0	0.84
Bradyrhizobium sp. Gha	Bradyrhizobium_japonicum_22	34.8	[31.4 - 38.3%]	0.4497	0.42	30.8	[28.4 - 33.3%]	0.138	0.14	32.8	[29.9 - 35.9%]	0.5257	0.01	1.66
Bradyrhizobium sp. Gha	Bradyrhizobium_japonicum_CCBA_15517	33.6	[30.2 - 37.2%]	0.4636	0.3	32.1	[29.7 - 34.6%]	0.1314	0.24	32.2	[29.2 - 35.3%]	0.5341	0.01	0.53
Bradyrhizobium sp. Gha	Bradyrhizobium_japonicum_CCBAU_15354	33.3	[29.9 - 36.9%]	0.4678	0.27	32.1	[29.7 - 34.6%]	0.1314	0.24	31.9	[29 - 35%]	0.5377	0.01	0.46
Bradyrhizobium sp. Gha	Bradyrhizobium_japonicum_CCBAU_15618	34.4	[31.1 - 38%]	0.4536	0.38	32	[29.6 - 34.5%]	0.1318	0.23	32.8	[29.9 - 35.9%]	0.5256	0.01	0.55
Bradyrhizobium sp. Gha	Bradyrhizobium_japonicum_CCBAU_25435	35.2	[31.8 - 38.7%]	0.4443	0.48	32	[29.6 - 34.5%]	0.1318	0.23	33.5	[30.5 - 36.5%]	0.5175	0.01	0.61
Bradyrhizobium sp. Gha	Bradyrhizobium_japonicum_CCBAU_83623	33.2	[29.8 - 36.8%]	0.4687	0.26	32.1	[29.7 - 34.6%]	0.1314	0.24	31.8	[28.9 - 34.9%]	0.5385	0.01	0.44
Bradyrhizobium sp. Gha	Bradyrhizobium_japonicum_E109	35.7	[32.3 - 39.2%]	0.4383	0.56	32	[29.6 - 34.5%]	0.1318	0.23	33.9	[30.9 - 37%]	0.5123	0.01	0.79
Bradyrhizobium sp. Gha	Bradyrhizobium_japonicum_FN1	35.8	[32.5 - 39.4%]	0.4369	0.57	32	[29.6 - 34.5%]	0.1319	0.23	34	[31 - 37.1%]	0.5112	0.01	0.82
Bradyrhizobium sp. Gha	Bradyrhizobium_japonicum_in8p8	32.5	[29.2 - 36.1%]	0.4776	0.21	29.6	[27.2 - 32.1%]	0.1446	0.09	30.8	[27.8 - 33.9%]	0.5531	0	0.92
Bradyrhizobium sp. Gha	Bradyrhizobium_japonicum_Is-1	36.8	[33.4 - 40.3%]	0.4263	0.74	31.8	[29.4 - 34.3%]	0.1329	0.21	34.7	[31.7 - 37.8%]	0.5025	0.02	1.12
Bradyrhizobium sp. Gha	Bradyrhizobium_japonicum_is5	32.6	[29.2 - 36.1%]	0.4774	0.21	29.5	[27.2 - 32%]	0.1447	0.09	30.8	[27.9 - 33.9%]	0.553	0	0.92
Bradyrhizobium sp. Gha	Bradyrhizobium_japonicum_Is-34	33.8	[30.4 - 37.4%]	0.4611	0.32	31.9	[29.5 - 34.4%]	0.1324	0.22	32.3	[29.4 - 35.4%]	0.5325	0.01	0.18
Bradyrhizobium sp. Gha	Bradyrhizobium_japonicum_SEMIA_5079	35.4	[32 - 38.9%]	0.4419	0.51	31.9	[29.5 - 34.4%]	0.1321	0.23	33.6	[30.7 - 36.7%]	0.5156	0.01	0.68
Bradyrhizobium sp. Gha	Bradyrhizobium_japonicum_USDA_4	37.9	[34.5 - 41.4%]	0.4143	1	31.2	[28.8 - 33.7%]	0.136	0.17	35.4	[32.5 - 38.5%]	0.4939	0.02	0.81
Bradyrhizobium sp. Gha	Bradyrhizobium_japonicum_USDA_6	35.8	[32.4 - 39.3%]	0.4378	0.56	32	[29.6 - 34.5%]	0.1319	0.23	33.9	[31 - 37%]	0.5119	0.01	0.8
Bradyrhizobium sp. Gha	Bradyrhizobium_japonicum_USDA_38	35	[31.6 - 38.5%]	0.4466	0.45	31.9	[29.5 - 34.4%]	0.1321	0.23	33.3	[30.3 - 36.4%]	0.5197	0.01	0.67
Bradyrhizobium sp. Gha	Bradyrhizobium_japonicum_USDA_122	36.8	[33.5 - 40.3%]	0.4257	0.76	31.8	[29.4 - 34.3%]	0.1329	0.21	34.7	[31.8 - 37.8%]	0.502	0.02	1.13
Bradyrhizobium sp. Gha	Bradyrhizobium_japonicum_USDA_123	33.6	[30.2 - 37.1%]	0.4644	0.29	31.8	[29.4 - 34.3%]	0.1326	0.22	32.1	[29.1 - 35.2%]	0.5354	0.01	0.41
Bradyrhizobium sp. Gha	Bradyrhizobium_japonicum_USDA_124	37.5	[34.1 - 41%]	0.4185	0.9	31.7	[29.3 - 34.2%]	0.1331	0.21	35.3	[32.3 - 38.3%]	0.4959	0.02	1.18
Bradyrhizobium sp. Gha	Bradyrhizobium_japonicum_USDA_135	34.4	[31.1 - 38%]	0.4536	0.38	30.9	[28.5 - 33.4%]	0.1374	0.15	32.6	[29.6 - 35.7%]	0.5287	0.01	1.09
Bradyrhizobium sp. Gha	Bradyrhizobium_jicamae_PAC68	20.1	[16.9 - 23.7%]	0.7091	0	22.9	[20.6 - 25.4%]	0.191	0	19.6	[16.9 - 22.6%]	0.7646	0	0.47
Bradyrhizobium sp. Gha	Bradyrhizobium_liaoningense_CCBAU_05525	33.2	[29.9 - 36.8%]	0.4685	0.27	31	[28.6 - 33.5%]	0.137	0.16	31.6	[28.7 - 34.7%]	0.5414	0	0.93
Bradyrhizobium sp. Gha	Bradyrhizobium_liaoningense_CCBAU_83689	33.4	[30 - 37%]	0.4664	0.28	31	[28.6 - 33.5%]	0.137	0.16	31.8	[28.8 - 34.9%]	0.5395	0	0.97
Bradyrhizobium sp. Gha	Bradyrhizobium_liaoningense_CCNWSX0360	34.5	[31.1 - 38%]	0.4532	0.39	30.8	[28.4 - 33.3%]	0.138	0.14	32.6	[29.6 - 35.7%]	0.5287	0.01	0.84
Bradyrhizobium sp. Gha	Rhizobium_lupini_HPC_L_OUTGROUP	12.8	[10.1 - 16.1%]	0.9837	0	17.9	[15.7 - 20.2%]	0.2459	0	13.2	[10.8 - 15.9%]	0.9877	0	3.65
Bradyrhizobium sp. Gha	Bradyrhizobium_manausense_BR3351	40	[36.6 - 43.4%]	0.3928	1.68	34.3	[31.9 - 36.8%]	0.1212	0.52	37.9	[34.9 - 40.9%]	0.4664	0.06	0
Bradyrhizobium sp. Gha	Bradyrhizobium_neotropicale_BR_10247	34.1	[30.7 - 37.6%]	0.4582	0.34	29.7	[27.3 - 32.2%]	0.1436	0.09	32	[29.1 - 35.1%]	0.5361	0.01	0.73
Bradyrhizobium sp. Gha	Bradyrhizobium_oligotrophicum_S58	19.8	[16.6 - 23.4%]	0.7181	0	22.5	[20.2 - 25%]	0.1947	0	19.3	[16.6 - 22.3%]	0.773	0	2.26
Bradyrhizobium sp. Gha	Bradyrhizobium_pachyrhizi_BR3262	22.2	[18.9 - 25.8%]	0.6572	0	23.8	[21.5 - 26.3%]	0.1833	0	21.4	[18.6 - 24.5%]	0.7201	0	0.89
Bradyrhizobium sp. Gha	Bradyrhizobium_pachyrhizi_PAC_48	22.5	[19.2 - 26.1%]	0.6497	0	23.8	[21.5 - 26.2%]	0.1838	0	21.7	[18.9 - 24.7%]	0.7141	0	0.89
Bradyrhizobium sp. Gha	Bradyrhizobium_paxllaeri_LMTR_21	20.6	[17.4 - 24.3%]	0.6949	0	22.7	[20.5 - 25.2%]	0.1925	0	20	[17.3 - 23.1%]	0.7537	0	0.38
Bradyrhizobium sp. Gha	Bradyrhizobium_retamae_Ro19	19.4	[16.2 - 23%]	0.7291	0	22.4	[20.1 - 24.8%]	0.1958	0	18.9	[16.2 - 22%]	0.7822	0	1
Bradyrhizobium sp. Gha	Bradyrhizobium_sp_17-4	19.6	[16.4 - 23.2%]	0.7224	0	24.8	[22.5 - 27.3%]	0.1753	0.01	19.3	[16.6 - 22.4%]	0.7711	0	1.01
Bradyrhizobium sp. Gha	Bradyrhizobium_sp_Ai1a-2	20	[16.8 - 23.6%]	0.7118	0	23.2	[20.9 - 25.6%]	0.1889	0	19.5	[16.8 - 22.6%]	0.7662	0	0.29
Bradyrhizobium sp. Gha	Bradyrhizobium_sp_ARR65	18.6	[15.5 - 22.2%]	0.75	0	22	[19.7 - 24.4%]	0.1996	0	18.3	[15.6 - 21.3%]	0.7999	0	0.86
Bradyrhizobium sp. Gha	Bradyrhizobium_sp_AT1	36.1	[32.7 - 39.6%]	0.4343	0.61	31.2	[28.8 - 33.7%]	0.1359	0.17	34	[31 - 37.1%]	0.5112	0.01	1.69
Bradyrhizobium sp. Gha	Bradyrhizobium_sp_BF49	37.8	[34.5 - 41.3%]	0.4147	0.99	30.5	[28.1 - 33%]	0.1394	0.13	35.2	[32.3 - 38.3%]	0.4963	0.02	0.9
Bradyrhizobium sp. Gha	Bradyrhizobium_sp_BR_10245	31.5	[28.1 - 35.1%]	0.4917	0.15	29.7	[27.3 - 32.2%]	0.1436	0.09	30	[27 - 33.1%]	0.5647	0	0.35
Bradyrhizobium sp. Gha	Bradyrhizobium_sp_BR_10303	21.8	[18.6 - 25.4%]	0.666	0	23.4	[21.1 - 25.8%]	0.1872	0	21	[18.3 - 24.1%]	0.7285	0	0.38
Bradyrhizobium sp. Gha	Bradyrhizobium_sp_CCBAU_15544	37.2	[33.8 - 40.7%]	0.4218	0.83	31.4	[29 - 33.9%]	0.135	0.18	34.9	[32 - 38%]	0.4998	0.02	0.87
Bradyrhizobium sp. Gha	Bradyrhizobium_sp_CCBAU_15615	37.2	[33.8 - 40.7%]	0.4218	0.83	31.3	[28.9 - 33.8%]	0.1354	0.18	34.9	[31.9 - 38%]	0.5001	0.02	0.8
Bradyrhizobium sp. Gha	Bradyrhizobium_sp_CCBAU_15635	37.9	[34.6 - 41.4%]	0.4138	1.01	31.3	[28.9 - 33.8%]	0.1351	0.18	35.5	[32.5 - 38.6%]	0.493	0.03	0.94
Bradyrhizobium sp. Gha	Bradyrhizobium_sp_CCBAU_41267	35.8	[32.4 - 39.3%]	0.4371	0.57	31.9	[29.5 - 34.4%]	0.1322	0.22	33.9	[31 - 37%]	0.5116	0.01	1.13
Bradyrhizobium sp. Gha	Bradyrhizobium_sp_CCBAU_43298	36.2	[32.9 - 39.7%]	0.4325	0.64	30.9	[28.5 - 33.4%]	0.1372	0.15	34	[31.1 - 37.1%]	0.5104	0.01	1.01
Bradyrhizobium sp. Gha	Bradyrhizobium_sp_CCGE-LA001	35.8	[32.5 - 39.4%]	0.4369	0.57	30.4	[28 - 32.9%]	0.1401	0.12	33.6	[30.7 - 36.7%]	0.5157	0.01	0.7
Bradyrhizobium sp. Gha	Bradyrhizobium_sp_CCH4-A6	15	[12.1 - 18.4%]	0.8801	0	21.2	[19 - 23.7%]	0.2068	0	15.1	[12.6 - 18%]	0.9049	0	1.97
Bradyrhizobium sp. Gha	Bradyrhizobium_sp_CCH5-F6	32.9	[29.5 - 36.5%]	0.4727	0.24	30.4	[28 - 32.9%]	0.1398	0.13	31.3	[28.3 - 34.4%]	0.5464	0	1.25
Bradyrhizobium sp. Gha	Bradyrhizobium_sp_CCH10-C7	14.8	[12 - 18.3%]	0.886	0	21	[18.8 - 23.5%]	0.2087	0	15	[12.5 - 17.9%]	0.9098	0	2.15
Bradyrhizobium sp. Gha	Bradyrhizobium_sp_Cp5_3	33.4	[30 - 36.9%]	0.4671	0.27	29.7	[27.3 - 32.2%]	0.1437	0.09	31.5	[28.5 - 34.6%]	0.5436	0	0.54
Bradyrhizobium sp. Gha	Bradyrhizobium_sp_DFCI-1	22.9	[19.6 - 26.5%]	0.6413	0	23.5	[21.2 - 25.9%]	0.1863	0	21.9	[19.1 - 25%]	0.7081	0	1.58
Bradyrhizobium sp. Gha	Bradyrhizobium_sp_DOA1	35.3	[32 - 38.9%]	0.4427	0.5	30.4	[28 - 32.9%]	0.1398	0.13	33.2	[30.3 - 36.3%]	0.5207	0.01	0.94
Bradyrhizobium sp. Gha	Bradyrhizobium_sp_DOA9	37.1	[33.7 - 40.6%]	0.4227	0.81	30.6	[28.2 - 33.1%]	0.1391	0.13	34.7	[31.7 - 37.7%]	0.503	0.02	1.62
Bradyrhizobium sp. Gha	Bradyrhizobium_sp_Ec3_3	29.9	[26.5 - 33.5%]	0.515	0.08	27.3	[25 - 29.8%]	0.1579	0.03	28.2	[25.3 - 31.3%]	0.5916	0	0.23
Bradyrhizobium sp. Gha	Bradyrhizobium_sp_G22	35.1	[31.7 - 38.6%]	0.4454	0.47	31.9	[29.5 - 34.4%]	0.1323	0.22	33.4	[30.4 - 36.4%]	0.5188	0.01	0.86
Bradyrhizobium sp. Gha	Bradyrhizobium_sp_Leaf396	32.2	[28.8 - 35.7%]	0.4827	0.19	29.6	[27.2 - 32.1%]	0.1444	0.09	30.5	[27.5 - 33.6%]	0.5575	0	0.92
Bradyrhizobium sp. Gha	Bradyrhizobium_sp_LMTR_3	20.2	[17 - 23.8%]	0.7058	0	22.4	[20.2 - 24.9%]	0.1954	0	19.6	[16.9 - 22.7%]	0.7633	0	0.6
Bradyrhizobium sp. Gha	Bradyrhizobium_sp_LTSP849	35.2	[31.8 - 38.7%]	0.4448	0.47	31.8	[29.4 - 34.4%]	0.1325	0.22	33.4	[30.4 - 36.5%]	0.5184	0.01	0.37
Bradyrhizobium sp. Gha	Bradyrhizobium_sp_LTSP857	35.8	[32.4 - 39.3%]	0.4371	0.57	31.8	[29.4 - 34.3%]	0.1326	0.22	33.9	[31 - 37%]	0.5118	0.01	0.42
Bradyrhizobium sp. Gha	Bradyrhizobium_sp_LTSP885	22.4	[19.1 - 26%]	0.6531	0	23.1	[20.8 - 25.6%]	0.1892	0	21.5	[18.7 - 24.5%]	0.7188	0	0.52
Bradyrhizobium sp. Gha	Bradyrhizobium_sp_LTSPM299	21.5	[18.2 - 25.1%]	0.6745	0	23	[20.7 - 25.5%]	0.1903	0	20.7	[18 - 23.8%]	0.7365	0	0.05
Bradyrhizobium sp. Gha	Bradyrhizobium_sp_OHSU_III	22.4	[19.1 - 26%]	0.653	0	23.5	[21.2 - 25.9%]	0.1863	0	21.5	[18.7 - 24.6%]	0.7176	0	1.84
Bradyrhizobium sp. Gha	Bradyrhizobium_sp_ORS_278	20.1	[16.9 - 23.7%]	0.7088	0	22.7	[20.4 - 25.1%]	0.1932	0	19.6	[16.9 - 22.6%]	0.7651	0	2.64
Bradyrhizobium sp. Gha	Bradyrhizobium_sp_ORS_285	20.2	[17 - 23.8%]	0.7064	0	22.5	[20.3 - 25%]	0.1943	0	19.6	[16.9 - 22.7%]	0.7634	0	2.36
Bradyrhizobium sp. Gha	Bradyrhizobium_sp_ORS_375	19.9	[16.7 - 23.5%]	0.7145	0	22.8	[20.5 - 25.3%]	0.1921	0	19.4	[16.7 - 22.4%]	0.7694	0	2.63
Bradyrhizobium sp. Gha	Bradyrhizobium_sp_S23321	36.9	[33.5 - 40.4%]	0.4254	0.76	31.4	[29 - 33.9%]	0.1347	0.19	34.7	[31.7 - 37.7%]	0.5028	0.02	1.43
Bradyrhizobium sp. Gha	Bradyrhizobium_sp_STM_3809	20.1	[16.9 - 23.7%]	0.7097	0	23.1	[20.8 - 25.5%]	0.1898	0	19.6	[16.9 - 22.6%]	0.7648	0	3.32
Bradyrhizobium sp. Gha	Bradyrhizobium_sp_STM_3843	19.2	[16.1 - 22.8%]	0.7329	0	22.6	[20.3 - 25%]	0.194	0	18.8	[16.2 - 21.9%]	0.7847	0	0.73
Bradyrhizobium sp. Gha	Bradyrhizobium_sp_th_b2	21.3	[18.1 - 25%]	0.6773	0	23.7	[21.4 - 26.2%]	0.184	0	20.7	[17.9 - 23.8%]	0.7367	0	0.4
Bradyrhizobium sp. Gha	Bradyrhizobium_sp_Tv2a-2	20.1	[17 - 23.7%]	0.7079	0	22.3	[20 - 24.7%]	0.197	0	19.6	[16.8 - 22.6%]	0.7654	0	0.67
Bradyrhizobium sp. Gha	Bradyrhizobium_sp_URHA0002	20.3	[17.1 - 23.9%]	0.7047	0	22.4	[20.1 - 24.8%]	0.1959	0	19.7	[17 - 22.7%]	0.7626	0	0.67
Bradyrhizobium sp. Gha	Bradyrhizobium_sp_URHA0013	39.2	[35.8 - 42.7%]	0.4004	1.39	30.3	[27.9 - 32.8%]	0.1405	0.12	36.2	[33.3 - 39.3%]	0.4847	0.03	0.9
Bradyrhizobium sp. Gha	Bradyrhizobium_sp_URHD0069	16.8	[13.8 - 20.3%]	0.8093	0	21.7	[19.4 - 24.1%]	0.2023	0	16.7	[14.2 - 19.7%]	0.8479	0	2.19
Bradyrhizobium sp. Gha	Bradyrhizobium_sp_USDA_3384	37.2	[33.8 - 40.7%]	0.4217	0.83	32.3	[29.9 - 34.8%]	0.1305	0.26	35.1	[32.2 - 38.2%]	0.4971	0.02	0.7
Bradyrhizobium sp. Gha	Bradyrhizobium_sp_WSM471	37.5	[34.2 - 41%]	0.418	0.91	30.4	[28 - 32.9%]	0.1398	0.13	35	[32 - 38%]	0.4993	0.02	0.54
Bradyrhizobium sp. Gha	Bradyrhizobium_sp_WSM1253	36.9	[33.6 - 40.4%]	0.4246	0.77	30.3	[27.9 - 32.8%]	0.1404	0.12	34.5	[31.5 - 37.5%]	0.5054	0.02	0.28
Bradyrhizobium sp. Gha	Bradyrhizobium_sp_WSM1417	37.5	[34.2 - 41%]	0.4179	0.91	30.4	[28 - 32.9%]	0.1401	0.12	34.9	[32 - 38%]	0.4995	0.02	0.3
Bradyrhizobium sp. Gha	Bradyrhizobium_sp_WSM1743	37.8	[34.4 - 41.3%]	0.4154	0.97	30.6	[28.2 - 33.1%]	0.1388	0.14	35.2	[32.2 - 38.3%]	0.4966	0.02	0.51
Bradyrhizobium sp. Gha	Bradyrhizobium_sp_WSM2254	36.3	[32.9 - 39.8%]	0.4318	0.65	31.9	[29.5 - 34.4%]	0.1325	0.22	34.3	[31.4 - 37.4%]	0.507	0.02	1.02
Bradyrhizobium sp. Gha	Bradyrhizobium_sp_WSM2793	38.8	[35.4 - 42.2%]	0.4051	1.24	31.3	[28.9 - 33.8%]	0.1354	0.18	36.1	[33.2 - 39.2%]	0.4856	0.03	0.66
Bradyrhizobium sp. Gha	Bradyrhizobium_sp_WSM3983	37.7	[34.3 - 41.1%]	0.4167	0.94	35.8	[33.4 - 38.3%]	0.1149	0.85	36.3	[33.4 - 39.4%]	0.4837	0.03	0.1
Bradyrhizobium sp. Gha	Bradyrhizobium_sp_WSM4349	37.2	[33.8 - 40.7%]	0.4217	0.83	30	[27.6 - 32.5%]	0.142	0.11	34.6	[31.6 - 37.7%]	0.5038	0.02	0.27
Bradyrhizobium sp. Gha	Bradyrhizobium_sp_YR681	35.9	[32.5 - 39.4%]	0.4365	0.58	32.3	[29.9 - 34.8%]	0.1303	0.26	34.1	[31.1 - 37.2%]	0.5099	0.01	1.85
Bradyrhizobium sp. Gha	Bradyrhizobium_stylosanthis_BR_446	35.2	[31.8 - 38.7%]	0.4448	0.47	32	[29.6 - 34.5%]	0.1319	0.23	33.4	[30.5 - 36.5%]	0.5181	0.01	1.69
Bradyrhizobium sp. Gha	Bradyrhizobium_tropiciagri_SEMIA_6148	21.9	[18.7 - 25.6%]	0.6626	0	23.7	[21.4 - 26.1%]	0.1846	0	21.2	[18.4 - 24.3%]	0.7249	0	0.63
Bradyrhizobium sp. Gha	Bradyrhizobium_valentinum_LmjM3	19.1	[16 - 22.7%]	0.7369	0	22.5	[20.3 - 25%]	0.1944	0	18.7	[16 - 21.7%]	0.788	0	0.95
Bradyrhizobium sp. Gha	Bradyrhizobium_valentinum_LmjM6	19.3	[16.1 - 22.8%]	0.7324	0	22.5	[20.2 - 24.9%]	0.1951	0	18.8	[16.2 - 21.9%]	0.7846	0	0.99
Bradyrhizobium sp. Gha	Bradyrhizobium_viridifuturi_SEMIA_690	22.7	[19.4 - 26.3%]	0.6455	0	23.6	[21.3 - 26.1%]	0.185	0	21.8	[19 - 24.9%]	0.7111	0	1.16
Bradyrhizobium sp. Gha	Bradyrhizobium_yuanmingense_BR3267	37.6	[34.2 - 41.1%]	0.4171	0.93	30.3	[27.9 - 32.8%]	0.1407	0.12	35	[32 - 38%]	0.4991	0.02	1
Bradyrhizobium sp. Gha	Bradyrhizobium_yuanmingense_CCBAU_05623	36	[32.6 - 39.5%]	0.435	0.6	30.3	[27.9 - 32.8%]	0.1407	0.12	33.7	[30.8 - 36.8%]	0.5145	0.01	0.92
Bradyrhizobium sp. Gha	Bradyrhizobium_yuanmingense_CCBAU_25021	36.7	[33.3 - 40.2%]	0.4276	0.72	30.2	[27.8 - 32.7%]	0.1409	0.12	34.2	[31.3 - 37.3%]	0.5083	0.01	0.94
Bradyrhizobium sp. Gha	Bradyrhizobium_yuanmingense_CCBAU_35157	36.7	[33.3 - 40.2%]	0.4276	0.72	30.3	[27.9 - 32.8%]	0.1406	0.12	34.2	[31.3 - 37.3%]	0.5081	0.01	1.07
Bradyrhizobium sp. Ghvi	Bradyrhizobium sp. OK095	40.7	[37.4 - 44.2%]	0.3854	2	31.6	[29.2 - 34.1%]	0.1339	0.2	37.8	[34.8 - 40.8%]	0.4677	0.06	0.85
Bradyrhizobium sp. Ghvi	Bradyrhizobium sp. R5	23.2	[19.9 - 26.9%]	0.6337	0	24.4	[22.1 - 26.8%]	0.179	0.01	22.3	[19.5 - 25.4%]	0.6993	0	0.61
Bradyrhizobium sp. Ghvi	Bradyrhizobium sp. Rc2d	41.1	[37.7 - 44.5%]	0.3819	2.18	31.8	[29.4 - 34.3%]	0.1328	0.22	38.1	[35.2 - 41.2%]	0.464	0.07	0.21
Bradyrhizobium sp. Ghvi	Bradyrhizobium sp. Rc3b	45.8	[42.4 - 49.2%]	0.3402	5.83	31.4	[29 - 33.9%]	0.1349	0.18	41.6	[38.6 - 44.6%]	0.4292	0.23	0.64
Bradyrhizobium sp. Ghvi	Bradyrhizobium yuanmingense CCBAU 10071	41.7	[38.3 - 45.1%]	0.3763	2.49	30.5	[28.1 - 33%]	0.1395	0.13	38.2	[35.2 - 41.2%]	0.4633	0.07	0.74
Bradyrhizobium sp. Ghvi	Bradyrhizobium yuanmingense CGMCC 1.3531	41.7	[38.3 - 45.1%]	0.3762	2.49	30.5	[28.1 - 33%]	0.1395	0.13	38.2	[35.2 - 41.2%]	0.4633	0.07	0.74
Bradyrhizobium sp. Ghvi	Mesorhizobium_ciceri_WSM1271_OUTGROUP	13.2	[10.4 - 16.5%]	0.9643	0	18.3	[16.2 - 20.7%]	0.24	0	13.5	[11.1 - 16.3%]	0.9728	0	0.47
Bradyrhizobium sp. Ghvi	Bradyrhizobium_diazoefficiens_SEMIA_5080	40.2	[36.8 - 43.6%]	0.3907	1.76	32.1	[29.6 - 34.6%]	0.1315	0.24	37.5	[34.5 - 40.5%]	0.4708	0.05	0.94
Bradyrhizobium sp. Ghvi	Bradyrhizobium_diazoefficiens_USDA_110	40.4	[37.1 - 43.9%]	0.3882	1.87	32.1	[29.7 - 34.6%]	0.1314	0.24	37.7	[34.7 - 40.7%]	0.4686	0.06	1.03
Bradyrhizobium sp. Ghvi	Bradyrhizobium_elkanii_587	21	[17.7 - 24.6%]	0.6867	0	24.6	[22.3 - 27.1%]	0.1769	0.01	20.5	[17.7 - 23.5%]	0.7421	0	0.61
Bradyrhizobium sp. Ghvi	Bradyrhizobium_elkanii_BLY3-8	22.8	[19.5 - 26.5%]	0.6426	0	23.8	[21.5 - 26.2%]	0.1838	0	21.9	[19.1 - 25%]	0.7083	0	0.77
Bradyrhizobium sp. Ghvi	Bradyrhizobium_elkanii_BLY6-1	22.8	[19.6 - 26.5%]	0.6425	0	23.8	[21.5 - 26.2%]	0.1838	0	21.9	[19.1 - 25%]	0.7082	0	0.77
Bradyrhizobium sp. Ghvi	Bradyrhizobium_elkanii_CCBAU_05737	22.1	[18.8 - 25.7%]	0.6602	0	24.3	[22 - 26.8%]	0.1796	0.01	21.4	[18.6 - 24.4%]	0.7212	0	0.48
Bradyrhizobium sp. Ghvi	Bradyrhizobium_elkanii_CCBAU_43297	22.7	[19.4 - 26.3%]	0.6462	0	24.1	[21.8 - 26.6%]	0.1808	0.01	21.8	[19.1 - 24.9%]	0.7101	0	0.72
Bradyrhizobium sp. Ghvi	Bradyrhizobium_elkanii_UASWS1015	22.5	[19.2 - 26.1%]	0.65	0	23.4	[21.1 - 25.8%]	0.187	0	21.6	[18.8 - 24.7%]	0.7154	0	1.61
Bradyrhizobium sp. Ghvi	Bradyrhizobium_elkanii_USDA_76	23.2	[19.9 - 26.8%]	0.6345	0	24	[21.7 - 26.5%]	0.1818	0	22.3	[19.5 - 25.3%]	0.7009	0	0.68
Bradyrhizobium sp. Ghvi	Bradyrhizobium_elkanii_USDA_94	22.6	[19.4 - 26.3%]	0.6468	0	24	[21.7 - 26.4%]	0.1822	0	21.8	[19 - 24.9%]	0.7111	0	0.71
Bradyrhizobium sp. Ghvi	Bradyrhizobium_elkanii_USDA_3254	23	[19.8 - 26.7%]	0.6379	0	23.8	[21.5 - 26.3%]	0.1834	0	22.1	[19.3 - 25.2%]	0.7043	0	0.75
Bradyrhizobium sp. Ghvi	Bradyrhizobium_elkanii_USDA_3259	23.1	[19.9 - 26.8%]	0.6357	0	23.8	[21.5 - 26.2%]	0.1837	0	22.2	[19.4 - 25.3%]	0.7026	0	0.88
Bradyrhizobium sp. Ghvi	Bradyrhizobium_elkanii_WSM1741	20.3	[17.1 - 23.9%]	0.7029	0	22.4	[20.1 - 24.8%]	0.1957	0	19.7	[17 - 22.8%]	0.761	0	0.94
Bradyrhizobium sp. Ghvi	Bradyrhizobium_elkanii_WSM2783	20.3	[17.1 - 23.9%]	0.7039	0	23.2	[20.9 - 25.7%]	0.1884	0	19.8	[17.1 - 22.8%]	0.7597	0	0.68
Bradyrhizobium sp. Ghvi	Bradyrhizobium_embrapense_SEMIA_6208	23.7	[20.4 - 27.3%]	0.6241	0.01	23.5	[21.2 - 25.9%]	0.1863	0	22.6	[19.8 - 25.7%]	0.6942	0	0.94
Bradyrhizobium sp. Ghvi	Bradyrhizobium_icense_LMTR_13	20.5	[17.3 - 24.1%]	0.6983	0	22.4	[20.2 - 24.9%]	0.1953	0	19.9	[17.1 - 22.9%]	0.7572	0	1.01
Bradyrhizobium sp. Ghvi	Bradyrhizobium_japonicum_22	39.7	[36.3 - 43.2%]	0.3954	1.58	30.9	[28.5 - 33.4%]	0.1374	0.15	36.8	[33.8 - 39.8%]	0.4784	0.04	1.49
Bradyrhizobium sp. Ghvi	Bradyrhizobium_japonicum_CCBA_15517	35.3	[31.9 - 38.8%]	0.4436	0.49	32	[29.6 - 34.5%]	0.1318	0.23	33.5	[30.6 - 36.6%]	0.5169	0.01	0.37
Bradyrhizobium sp. Ghvi	Bradyrhizobium_japonicum_CCBAU_15354	35	[31.6 - 38.6%]	0.4465	0.45	32	[29.6 - 34.5%]	0.1319	0.23	33.3	[30.4 - 36.4%]	0.5195	0.01	0.3
Bradyrhizobium sp. Ghvi	Bradyrhizobium_japonicum_CCBAU_15618	36.7	[33.3 - 40.2%]	0.427	0.73	31.9	[29.4 - 34.4%]	0.1325	0.22	34.7	[31.7 - 37.7%]	0.503	0.02	0.39
Bradyrhizobium sp. Ghvi	Bradyrhizobium_japonicum_CCBAU_25435	37.6	[34.2 - 41.1%]	0.4173	0.93	31.9	[29.5 - 34.4%]	0.1323	0.22	35.4	[32.4 - 38.4%]	0.4944	0.02	0.45
Bradyrhizobium sp. Ghvi	Bradyrhizobium_japonicum_CCBAU_83623	34.9	[31.5 - 38.5%]	0.4477	0.44	32	[29.6 - 34.5%]	0.1317	0.23	33.2	[30.3 - 36.3%]	0.5205	0.01	0.28
Bradyrhizobium sp. Ghvi	Bradyrhizobium_japonicum_E109	38.7	[35.4 - 42.2%]	0.4052	1.24	31.9	[29.5 - 34.4%]	0.1323	0.22	36.3	[33.3 - 39.4%]	0.4839	0.03	0.63
Bradyrhizobium sp. Ghvi	Bradyrhizobium_japonicum_FN1	38.9	[35.5 - 42.4%]	0.4037	1.29	31.9	[29.5 - 34.4%]	0.1324	0.22	36.4	[33.5 - 39.5%]	0.4826	0.04	0.65
Bradyrhizobium sp. Ghvi	Bradyrhizobium_japonicum_in8p8	37.3	[33.9 - 40.8%]	0.4209	0.85	29.6	[27.2 - 32.1%]	0.1442	0.09	34.5	[31.6 - 37.6%]	0.5044	0.02	0.75
Bradyrhizobium sp. Ghvi	Bradyrhizobium_japonicum_Is-1	40.5	[37.1 - 43.9%]	0.3879	1.89	32	[29.6 - 34.5%]	0.1316	0.24	37.7	[34.7 - 40.8%]	0.4684	0.06	0.96
Bradyrhizobium sp. Ghvi	Bradyrhizobium_japonicum_is5	37.3	[33.9 - 40.8%]	0.4207	0.85	29.6	[27.2 - 32.1%]	0.1443	0.09	34.5	[31.6 - 37.6%]	0.5043	0.02	0.76
Bradyrhizobium sp. Ghvi	Bradyrhizobium_japonicum_Is-34	36	[32.6 - 39.5%]	0.4353	0.6	31.7	[29.3 - 34.2%]	0.1331	0.21	34	[31.1 - 37.1%]	0.5105	0.01	0.02
Bradyrhizobium sp. Ghvi	Bradyrhizobium_japonicum_SEMIA_5079	37.6	[34.2 - 41.1%]	0.4175	0.92	31.9	[29.5 - 34.4%]	0.1323	0.22	35.4	[32.4 - 38.4%]	0.4946	0.02	0.51
Bradyrhizobium sp. Ghvi	Bradyrhizobium_japonicum_USDA_4	42.3	[38.9 - 45.8%]	0.3704	2.87	31.2	[28.8 - 33.7%]	0.1357	0.17	38.9	[35.9 - 41.9%]	0.4558	0.09	0.64
Bradyrhizobium sp. Ghvi	Bradyrhizobium_japonicum_USDA_6	38.8	[35.4 - 42.3%]	0.4049	1.25	31.9	[29.5 - 34.4%]	0.1324	0.22	36.3	[33.4 - 39.4%]	0.4837	0.03	0.63
Bradyrhizobium sp. Ghvi	Bradyrhizobium_japonicum_USDA_38	37.5	[34.1 - 40.9%]	0.4189	0.89	31.8	[29.4 - 34.3%]	0.1329	0.21	35.2	[32.3 - 38.3%]	0.4961	0.02	0.51
Bradyrhizobium sp. Ghvi	Bradyrhizobium_japonicum_USDA_122	40.5	[37.1 - 43.9%]	0.3879	1.89	32	[29.6 - 34.5%]	0.1316	0.24	37.7	[34.7 - 40.8%]	0.4684	0.06	0.97
Bradyrhizobium sp. Ghvi	Bradyrhizobium_japonicum_USDA_123	35.2	[31.8 - 38.7%]	0.4444	0.48	31.7	[29.3 - 34.3%]	0.133	0.21	33.4	[30.5 - 36.5%]	0.5183	0.01	0.24
Bradyrhizobium sp. Ghvi	Bradyrhizobium_japonicum_USDA_124	39.9	[36.5 - 43.3%]	0.3938	1.64	32.1	[29.7 - 34.6%]	0.1314	0.24	37.2	[34.3 - 40.3%]	0.4735	0.05	1.02
Bradyrhizobium sp. Ghvi	Bradyrhizobium_japonicum_USDA_135	38.5	[35.1 - 42%]	0.4076	1.17	31	[28.6 - 33.6%]	0.1366	0.16	35.9	[32.9 - 39%]	0.4885	0.03	0.93
Bradyrhizobium sp. Ghvi	Bradyrhizobium_jicamae_PAC68	20.6	[17.4 - 24.3%]	0.6949	0	22.7	[20.4 - 25.1%]	0.1933	0	20	[17.3 - 23.1%]	0.7539	0	0.63
Bradyrhizobium sp. Ghvi	Bradyrhizobium_liaoningense_CCBAU_05525	36.6	[33.3 - 40.2%]	0.4278	0.72	31.1	[28.7 - 33.6%]	0.1364	0.16	34.4	[31.5 - 37.5%]	0.5059	0.02	0.77
Bradyrhizobium sp. Ghvi	Bradyrhizobium_liaoningense_CCBAU_83689	36.9	[33.6 - 40.5%]	0.4244	0.78	31	[28.6 - 33.6%]	0.1366	0.16	34.7	[31.7 - 37.7%]	0.503	0.02	0.8
Bradyrhizobium sp. Ghvi	Bradyrhizobium_liaoningense_CCNWSX0360	38	[34.6 - 41.5%]	0.4133	1.02	31.1	[28.7 - 33.6%]	0.1364	0.16	35.5	[32.5 - 38.5%]	0.4934	0.02	0.68
Bradyrhizobium sp. Ghvi	Rhizobium_lupini_HPC_L_OUTGROUP	12.7	[10.1 - 16%]	0.9862	0	17.5	[15.3 - 19.8%]	0.2514	0	13.1	[10.8 - 15.9%]	0.9897	0	3.82
Bradyrhizobium sp. Ghvi	Bradyrhizobium_manausense_BR3351	41.6	[38.3 - 45.1%]	0.3766	2.47	34	[31.6 - 36.5%]	0.1226	0.47	39.2	[36.2 - 42.2%]	0.453	0.1	0.17
Bradyrhizobium sp. Ghvi	Bradyrhizobium_neotropicale_BR_10247	36.4	[33.1 - 39.9%]	0.4302	0.68	29.8	[27.4 - 32.3%]	0.1432	0.1	33.9	[31 - 37%]	0.5118	0.01	0.57
Bradyrhizobium sp. Ghvi	Bradyrhizobium_oligotrophicum_S58	20.4	[17.2 - 24.1%]	0.6999	0	22.7	[20.4 - 25.1%]	0.1932	0	19.9	[17.1 - 22.9%]	0.7579	0	2.09
Bradyrhizobium sp. Ghvi	Bradyrhizobium_pachyrhizi_BR3262	22.9	[19.6 - 26.5%]	0.642	0	23.7	[21.4 - 26.2%]	0.184	0	21.9	[19.1 - 25%]	0.7079	0	0.73
Bradyrhizobium sp. Ghvi	Bradyrhizobium_pachyrhizi_PAC_48	22.8	[19.5 - 26.5%]	0.6429	0	23.8	[21.5 - 26.2%]	0.1838	0	21.9	[19.1 - 25%]	0.7085	0	0.73
Bradyrhizobium sp. Ghvi	Bradyrhizobium_paxllaeri_LMTR_21	21	[17.7 - 24.6%]	0.6868	0	22.6	[20.4 - 25.1%]	0.1935	0	20.3	[17.5 - 23.3%]	0.7474	0	0.54
Bradyrhizobium sp. Ghvi	Bradyrhizobium_retamae_Ro19	19.6	[16.4 - 23.2%]	0.7225	0	22.3	[20.1 - 24.8%]	0.1963	0	19.1	[16.4 - 22.2%]	0.777	0	1.17
Bradyrhizobium sp. Ghvi	Bradyrhizobium_sp_17-4	19.7	[16.6 - 23.3%]	0.7185	0	24.9	[22.6 - 27.4%]	0.1749	0.01	19.5	[16.8 - 22.5%]	0.7678	0	0.84
Bradyrhizobium sp. Ghvi	Bradyrhizobium_sp_Ai1a-2	20.7	[17.5 - 24.3%]	0.6938	0	23	[20.7 - 25.5%]	0.1901	0	20.1	[17.3 - 23.1%]	0.752	0	0.46
Bradyrhizobium sp. Ghvi	Bradyrhizobium_sp_ARR65	19.3	[16.1 - 22.9%]	0.7313	0	22	[19.7 - 24.4%]	0.1993	0	18.8	[16.2 - 21.9%]	0.7849	0	1.02
Bradyrhizobium sp. Ghvi	Bradyrhizobium_sp_AT1	41.6	[38.2 - 45%]	0.3772	2.44	31	[28.6 - 33.6%]	0.1366	0.16	38.3	[35.3 - 41.3%]	0.4622	0.07	1.52
Bradyrhizobium sp. Ghvi	Bradyrhizobium_sp_BF49	41.9	[38.5 - 45.4%]	0.3741	2.63	30.5	[28.1 - 33%]	0.1396	0.13	38.4	[35.4 - 41.4%]	0.4614	0.08	0.74
Bradyrhizobium sp. Ghvi	Bradyrhizobium_sp_BR_10245	33.1	[29.8 - 36.7%]	0.4698	0.26	29.9	[27.5 - 32.4%]	0.1427	0.1	31.3	[28.4 - 34.4%]	0.5454	0	0.19
Bradyrhizobium sp. Ghvi	Bradyrhizobium_sp_BR_10303	22.1	[18.8 - 25.7%]	0.6597	0	23.5	[21.2 - 25.9%]	0.1865	0	21.3	[18.5 - 24.3%]	0.7232	0	0.21
Bradyrhizobium sp. Ghvi	Bradyrhizobium_sp_CCBAU_15544	41.3	[37.9 - 44.7%]	0.3799	2.28	31.3	[28.9 - 33.8%]	0.1354	0.18	38.1	[35.2 - 41.2%]	0.4639	0.07	0.7
Bradyrhizobium sp. Ghvi	Bradyrhizobium_sp_CCBAU_15615	41.4	[38 - 44.8%]	0.3791	2.33	31.4	[29 - 33.9%]	0.1348	0.18	38.2	[35.3 - 41.3%]	0.4628	0.07	0.64
Bradyrhizobium sp. Ghvi	Bradyrhizobium_sp_CCBAU_15635	42.7	[39.3 - 46.1%]	0.367	3.11	31.3	[28.9 - 33.8%]	0.1351	0.18	39.2	[36.3 - 42.3%]	0.4525	0.1	0.78
Bradyrhizobium sp. Ghvi	Bradyrhizobium_sp_CCBAU_41267	39.6	[36.2 - 43%]	0.3969	1.52	32.2	[29.8 - 34.7%]	0.131	0.25	37	[34.1 - 40.1%]	0.4759	0.05	0.97
Bradyrhizobium sp. Ghvi	Bradyrhizobium_sp_CCBAU_43298	40.8	[37.5 - 44.3%]	0.3843	2.06	31.1	[28.7 - 33.6%]	0.1361	0.17	37.7	[34.8 - 40.8%]	0.4681	0.06	0.85
Bradyrhizobium sp. Ghvi	Bradyrhizobium_sp_CCGE-LA001	40.1	[36.8 - 43.6%]	0.3911	1.75	30.3	[27.9 - 32.8%]	0.1405	0.12	36.9	[34 - 40%]	0.4766	0.04	0.53
Bradyrhizobium sp. Ghvi	Bradyrhizobium_sp_CCH4-A6	15	[12.1 - 18.4%]	0.8808	0	21.3	[19 - 23.7%]	0.2063	0	15.1	[12.6 - 18%]	0.9054	0	2.14
Bradyrhizobium sp. Ghvi	Bradyrhizobium_sp_CCH5-F6	36.9	[33.6 - 40.4%]	0.4245	0.78	30.4	[28.1 - 33%]	0.1397	0.13	34.5	[31.5 - 37.6%]	0.5049	0.02	1.09
Bradyrhizobium sp. Ghvi	Bradyrhizobium_sp_CCH10-C7	15	[12.1 - 18.4%]	0.8811	0	20.9	[18.6 - 23.3%]	0.2104	0	15.1	[12.6 - 18%]	0.9061	0	2.31
Bradyrhizobium sp. Ghvi	Bradyrhizobium_sp_Cp5_3	35.6	[32.3 - 39.2%]	0.4393	0.54	29.8	[27.4 - 32.3%]	0.143	0.1	33.3	[30.4 - 36.4%]	0.5195	0.01	0.38
Bradyrhizobium sp. Ghvi	Bradyrhizobium_sp_DFCI-1	23	[19.7 - 26.6%]	0.6398	0	23.5	[21.2 - 26%]	0.1859	0	22	[19.2 - 25.1%]	0.7067	0	1.41
Bradyrhizobium sp. Ghvi	Bradyrhizobium_sp_DOA1	39.8	[36.5 - 43.3%]	0.3942	1.62	30.4	[28 - 32.9%]	0.1401	0.12	36.7	[33.8 - 39.8%]	0.479	0.04	0.78
Bradyrhizobium sp. Ghvi	Bradyrhizobium_sp_DOA9	41.5	[38.1 - 44.9%]	0.3781	2.38	30.8	[28.4 - 33.3%]	0.1377	0.15	38.1	[35.2 - 41.2%]	0.4638	0.07	1.46
Bradyrhizobium sp. Ghvi	Bradyrhizobium_sp_Ec3_3	30.3	[27 - 33.9%]	0.508	0.1	27.4	[25 - 29.9%]	0.1576	0.03	28.6	[25.7 - 31.7%]	0.5855	0	0.39
Bradyrhizobium sp. Ghvi	Bradyrhizobium_sp_G22	37.1	[33.8 - 40.6%]	0.4222	0.82	31.9	[29.5 - 34.4%]	0.1324	0.22	35	[32.1 - 38.1%]	0.4987	0.02	0.7
Bradyrhizobium sp. Ghvi	Bradyrhizobium_sp_Leaf396	36.2	[32.8 - 39.7%]	0.4329	0.63	29.6	[27.2 - 32.1%]	0.1445	0.09	33.7	[30.7 - 36.8%]	0.5148	0.01	0.75
Bradyrhizobium sp. Ghvi	Bradyrhizobium_sp_LMTR_3	20.5	[17.3 - 24.2%]	0.6972	0	22.5	[20.2 - 25%]	0.1946	0	19.9	[17.2 - 23%]	0.7561	0	0.76
Bradyrhizobium sp. Ghvi	Bradyrhizobium_sp_LTSP849	37.6	[34.2 - 41.1%]	0.4174	0.92	31.6	[29.2 - 34.1%]	0.1339	0.2	35.3	[32.3 - 38.4%]	0.4954	0.02	0.21
Bradyrhizobium sp. Ghvi	Bradyrhizobium_sp_LTSP857	38.1	[34.8 - 41.6%]	0.4116	1.06	31.5	[29.1 - 34%]	0.1341	0.19	35.7	[32.8 - 38.8%]	0.4905	0.03	0.25
Bradyrhizobium sp. Ghvi	Bradyrhizobium_sp_LTSP885	23.1	[19.8 - 26.7%]	0.6375	0	23	[20.7 - 25.5%]	0.1903	0	22	[19.2 - 25.1%]	0.7065	0	0.35
Bradyrhizobium sp. Ghvi	Bradyrhizobium_sp_LTSPM299	21.7	[18.4 - 25.3%]	0.6687	0	23.1	[20.8 - 25.5%]	0.1895	0	20.9	[18.2 - 24%]	0.7315	0	0.22
Bradyrhizobium sp. Ghvi	Bradyrhizobium_sp_OHSU_III	22.7	[19.5 - 26.4%]	0.6448	0	23.4	[21.1 - 25.8%]	0.1872	0	21.8	[19 - 24.9%]	0.7113	0	1.68
Bradyrhizobium sp. Ghvi	Bradyrhizobium_sp_ORS_278	20.5	[17.3 - 24.2%]	0.6972	0	22.7	[20.4 - 25.1%]	0.193	0	19.9	[17.2 - 23%]	0.7556	0	2.48
Bradyrhizobium sp. Ghvi	Bradyrhizobium_sp_ORS_285	20.7	[17.5 - 24.3%]	0.6943	0	22.7	[20.4 - 25.2%]	0.1928	0	20	[17.3 - 23.1%]	0.7533	0	2.2
Bradyrhizobium sp. Ghvi	Bradyrhizobium_sp_ORS_375	20.6	[17.4 - 24.2%]	0.697	0	22.9	[20.6 - 25.3%]	0.1915	0	20	[17.2 - 23%]	0.755	0	2.46
Bradyrhizobium sp. Ghvi	Bradyrhizobium_sp_S23321	41.3	[38 - 44.8%]	0.3794	2.31	31.2	[28.8 - 33.7%]	0.1357	0.17	38.2	[35.2 - 41.2%]	0.4636	0.07	1.27
Bradyrhizobium sp. Ghvi	Bradyrhizobium_sp_STM_3809	21.1	[17.9 - 24.7%]	0.6827	0	23	[20.7 - 25.4%]	0.1904	0	20.4	[17.7 - 23.5%]	0.7431	0	3.15
Bradyrhizobium sp. Ghvi	Bradyrhizobium_sp_STM_3843	19.8	[16.6 - 23.4%]	0.7173	0	22.5	[20.2 - 24.9%]	0.1947	0	19.3	[16.6 - 22.3%]	0.7724	0	0.57
Bradyrhizobium sp. Ghvi	Bradyrhizobium_sp_th_b2	21.8	[18.6 - 25.5%]	0.6654	0	23.6	[21.3 - 26%]	0.1854	0	21.1	[18.3 - 24.2%]	0.7274	0	0.24
Bradyrhizobium sp. Ghvi	Bradyrhizobium_sp_Tv2a-2	20.3	[17.1 - 23.9%]	0.7037	0	22.2	[19.9 - 24.7%]	0.1974	0	19.7	[17 - 22.7%]	0.7622	0	0.83
Bradyrhizobium sp. Ghvi	Bradyrhizobium_sp_URHA0002	20.6	[17.4 - 24.2%]	0.6968	0	22.2	[19.9 - 24.6%]	0.1978	0	19.9	[17.2 - 22.9%]	0.7568	0	0.84
Bradyrhizobium sp. Ghvi	Bradyrhizobium_sp_URHA0013	42.3	[39 - 45.8%]	0.3702	2.88	30.3	[27.9 - 32.8%]	0.1403	0.12	38.6	[35.7 - 41.7%]	0.4585	0.08	0.73
Bradyrhizobium sp. Ghvi	Bradyrhizobium_sp_URHD0069	17	[14 - 20.6%]	0.8017	0	21.6	[19.4 - 24%]	0.2031	0	16.9	[14.3 - 19.9%]	0.842	0	2.36
Bradyrhizobium sp. Ghvi	Bradyrhizobium_sp_USDA_3384	39.9	[36.5 - 43.4%]	0.3935	1.65	32.5	[30.1 - 35%]	0.1295	0.28	37.4	[34.4 - 40.4%]	0.4721	0.05	0.53
Bradyrhizobium sp. Ghvi	Bradyrhizobium_sp_WSM471	41.6	[38.2 - 45%]	0.3772	2.44	30.4	[28 - 32.9%]	0.1401	0.12	38.1	[35.1 - 41.1%]	0.4644	0.07	0.37
Bradyrhizobium sp. Ghvi	Bradyrhizobium_sp_WSM1253	40.8	[37.4 - 44.2%]	0.385	2.02	30.2	[27.8 - 32.7%]	0.1409	0.12	37.4	[34.5 - 40.5%]	0.4716	0.05	0.11
Bradyrhizobium sp. Ghvi	Bradyrhizobium_sp_WSM1417	40.4	[37 - 43.8%]	0.389	1.84	30.4	[28 - 32.9%]	0.1401	0.12	37.1	[34.2 - 40.2%]	0.4746	0.05	0.13
Bradyrhizobium sp. Ghvi	Bradyrhizobium_sp_WSM1743	42.4	[39 - 45.8%]	0.3697	2.92	31.3	[28.9 - 33.8%]	0.1352	0.18	39	[36 - 42%]	0.4549	0.1	0.35
Bradyrhizobium sp. Ghvi	Bradyrhizobium_sp_WSM2254	39.9	[36.6 - 43.4%]	0.3932	1.66	31.9	[29.5 - 34.5%]	0.1321	0.23	37.3	[34.3 - 40.3%]	0.4733	0.05	0.85
Bradyrhizobium sp. Ghvi	Bradyrhizobium_sp_WSM2793	44.4	[41 - 47.8%]	0.3518	4.45	31.6	[29.2 - 34.1%]	0.1339	0.2	40.6	[37.7 - 43.7%]	0.4386	0.17	0.5
Bradyrhizobium sp. Ghvi	Bradyrhizobium_sp_WSM3983	40.7	[37.3 - 44.1%]	0.3858	1.98	35	[32.5 - 37.5%]	0.1183	0.65	38.6	[35.7 - 41.7%]	0.4585	0.08	0.06
Bradyrhizobium sp. Ghvi	Bradyrhizobium_sp_WSM4349	40.1	[36.7 - 43.6%]	0.3914	1.73	29.9	[27.5 - 32.4%]	0.1425	0.1	36.8	[33.9 - 39.9%]	0.4781	0.04	0.1
Bradyrhizobium sp. Ghvi	Bradyrhizobium_sp_YR681	40.2	[36.8 - 43.7%]	0.3904	1.77	32.1	[29.7 - 34.6%]	0.1312	0.24	37.5	[34.6 - 40.6%]	0.4704	0.06	1.69
Bradyrhizobium sp. Ghvi	Bradyrhizobium_stylosanthis_BR_446	38.6	[35.2 - 42%]	0.4071	1.19	32	[29.6 - 34.5%]	0.1317	0.23	36.2	[33.2 - 39.2%]	0.4852	0.03	1.52
Bradyrhizobium sp. Ghvi	Bradyrhizobium_tropiciagri_SEMIA_6148	22.7	[19.4 - 26.3%]	0.646	0	23.7	[21.4 - 26.2%]	0.1841	0	21.8	[19 - 24.9%]	0.7111	0	0.46
Bradyrhizobium sp. Ghvi	Bradyrhizobium_valentinum_LmjM3	19.4	[16.3 - 23%]	0.7281	0	22.6	[20.3 - 25.1%]	0.1938	0	19	[16.3 - 22%]	0.7808	0	1.11
Bradyrhizobium sp. Ghvi	Bradyrhizobium_valentinum_LmjM6	19.6	[16.4 - 23.2%]	0.7238	0	22.5	[20.3 - 25%]	0.1944	0	19.1	[16.4 - 22.1%]	0.7775	0	1.15
Bradyrhizobium sp. Ghvi	Bradyrhizobium_viridifuturi_SEMIA_690	23.6	[20.3 - 27.3%]	0.625	0.01	23.6	[21.3 - 26.1%]	0.1852	0	22.6	[19.7 - 25.6%]	0.6944	0	0.99
Bradyrhizobium sp. Ghvi	Bradyrhizobium_yuanmingense_BR3267	43.9	[40.5 - 47.3%]	0.356	4.03	30.6	[28.2 - 33.1%]	0.1387	0.14	39.9	[37 - 43%]	0.4453	0.13	0.84
Bradyrhizobium sp. Ghvi	Bradyrhizobium_yuanmingense_CCBAU_05623	41.3	[37.9 - 44.7%]	0.3803	2.26	30.4	[28 - 32.9%]	0.1398	0.13	37.8	[34.9 - 40.9%]	0.4669	0.06	0.75
Bradyrhizobium sp. Ghvi	Bradyrhizobium_yuanmingense_CCBAU_25021	41.7	[38.3 - 45.2%]	0.3759	2.51	30.6	[28.2 - 33.1%]	0.1392	0.13	38.2	[35.3 - 41.3%]	0.4628	0.07	0.78
Bradyrhizobium sp. Ghvi	Bradyrhizobium_yuanmingense_CCBAU_35157	41.9	[38.5 - 45.3%]	0.3746	2.6	30.6	[28.2 - 33.1%]	0.139	0.13	38.4	[35.4 - 41.4%]	0.4615	0.08	0.9
Bradyrhizobium sp. OK095	Bradyrhizobium sp. R5	22.8	[19.6 - 26.5%]	0.6424	0	23.6	[21.3 - 26%]	0.1855	0	21.9	[19.1 - 25%]	0.7087	0	0.24
Bradyrhizobium sp. OK095	Bradyrhizobium sp. Rc2d	39.7	[36.4 - 43.2%]	0.3951	1.59	33.7	[31.3 - 36.2%]	0.1239	0.43	37.6	[34.6 - 40.6%]	0.47	0.06	1.06
Bradyrhizobium sp. OK095	Bradyrhizobium sp. Rc3b	46.6	[43.2 - 50%]	0.3331	6.86	34.1	[31.7 - 36.6%]	0.122	0.49	43.2	[40.2 - 46.2%]	0.4145	0.39	0.21
Bradyrhizobium sp. OK095	Bradyrhizobium yuanmingense CCBAU 10071	42	[38.6 - 45.4%]	0.3732	2.68	32.4	[30 - 34.9%]	0.1298	0.27	39	[36.1 - 42.1%]	0.4546	0.1	0.12
Bradyrhizobium sp. OK095	Bradyrhizobium yuanmingense CGMCC 1.3531	42	[38.6 - 45.5%]	0.3731	2.69	32.4	[30 - 34.9%]	0.1298	0.27	39	[36.1 - 42.1%]	0.4545	0.1	0.11
Bradyrhizobium sp. OK095	Mesorhizobium_ciceri_WSM1271_OUTGROUP	13.1	[10.4 - 16.4%]	0.9662	0	18.3	[16.2 - 20.7%]	0.2398	0	13.4	[11.1 - 16.2%]	0.9743	0	1.33
Bradyrhizobium sp. OK095	Bradyrhizobium_diazoefficiens_SEMIA_5080	49.8	[46.4 - 53.3%]	0.308	11.99	36.5	[34 - 39%]	0.1121	1.04	46.5	[43.5 - 49.5%]	0.3856	1.07	0.09
Bradyrhizobium sp. OK095	Bradyrhizobium_diazoefficiens_USDA_110	50.4	[46.9 - 53.8%]	0.304	13.07	36.4	[34 - 38.9%]	0.1125	1.01	46.9	[43.9 - 49.9%]	0.3823	1.2	0.17
Bradyrhizobium sp. OK095	Bradyrhizobium_elkanii_587	20.5	[17.3 - 24.1%]	0.6979	0	24.3	[22 - 26.8%]	0.1794	0.01	20.1	[17.3 - 23.1%]	0.7521	0	0.24
Bradyrhizobium sp. OK095	Bradyrhizobium_elkanii_BLY3-8	22.8	[19.5 - 26.5%]	0.6427	0	23.7	[21.4 - 26.2%]	0.184	0	21.9	[19.1 - 25%]	0.7084	0	0.08
Bradyrhizobium sp. OK095	Bradyrhizobium_elkanii_BLY6-1	22.8	[19.6 - 26.5%]	0.6423	0	23.7	[21.4 - 26.2%]	0.184	0	21.9	[19.1 - 25%]	0.7081	0	0.08
Bradyrhizobium sp. OK095	Bradyrhizobium_elkanii_CCBAU_05737	22	[18.7 - 25.6%]	0.6624	0	23.9	[21.6 - 26.3%]	0.1829	0	21.2	[18.5 - 24.3%]	0.7242	0	0.38
Bradyrhizobium sp. OK095	Bradyrhizobium_elkanii_CCBAU_43297	22.2	[19 - 25.9%]	0.6557	0	23.9	[21.6 - 26.4%]	0.1825	0	21.5	[18.7 - 24.5%]	0.7185	0	0.14
Bradyrhizobium sp. OK095	Bradyrhizobium_elkanii_UASWS1015	23.9	[20.6 - 27.6%]	0.6187	0.01	23.5	[21.2 - 25.9%]	0.1864	0	22.8	[20 - 25.9%]	0.6898	0	0.75
Bradyrhizobium sp. OK095	Bradyrhizobium_elkanii_USDA_76	22.8	[19.6 - 26.5%]	0.6426	0	23.7	[21.4 - 26.2%]	0.1845	0	21.9	[19.1 - 25%]	0.7085	0	0.17
Bradyrhizobium sp. OK095	Bradyrhizobium_elkanii_USDA_94	22.7	[19.4 - 26.3%]	0.6465	0	23.7	[21.4 - 26.1%]	0.1846	0	21.8	[19 - 24.9%]	0.7118	0	0.14
Bradyrhizobium sp. OK095	Bradyrhizobium_elkanii_USDA_3254	23.2	[20 - 26.9%]	0.6336	0	23.6	[21.3 - 26%]	0.1856	0	22.2	[19.4 - 25.3%]	0.7016	0	0.11
Bradyrhizobium sp. OK095	Bradyrhizobium_elkanii_USDA_3259	23.5	[20.2 - 27.1%]	0.6279	0.01	23.6	[21.3 - 26%]	0.1856	0	22.4	[19.6 - 25.5%]	0.697	0	0.03
Bradyrhizobium sp. OK095	Bradyrhizobium_elkanii_WSM1741	21.8	[18.6 - 25.5%]	0.6656	0	22.2	[19.9 - 24.6%]	0.1976	0	20.9	[18.1 - 24%]	0.7317	0	1.79
Bradyrhizobium sp. OK095	Bradyrhizobium_elkanii_WSM2783	20.9	[17.7 - 24.6%]	0.6874	0	23.1	[20.8 - 25.6%]	0.1892	0	20.3	[17.6 - 23.4%]	0.7465	0	1.54
Bradyrhizobium sp. OK095	Bradyrhizobium_embrapense_SEMIA_6208	23.9	[20.6 - 27.5%]	0.6202	0.01	23.5	[21.2 - 25.9%]	0.1862	0	22.7	[19.9 - 25.8%]	0.6909	0	0.09
Bradyrhizobium sp. OK095	Bradyrhizobium_icense_LMTR_13	21.4	[18.2 - 25.1%]	0.6748	0	22.2	[19.9 - 24.6%]	0.1976	0	20.6	[17.9 - 23.7%]	0.7391	0	1.86
Bradyrhizobium sp. OK095	Bradyrhizobium_japonicum_22	42.1	[38.7 - 45.5%]	0.3723	2.74	32.9	[30.5 - 35.4%]	0.1275	0.32	39.2	[36.3 - 42.3%]	0.4524	0.1	0.64
Bradyrhizobium sp. OK095	Bradyrhizobium_japonicum_CCBA_15517	45.7	[42.3 - 49.1%]	0.3411	5.71	36.5	[34 - 39%]	0.1121	1.04	43.1	[40.1 - 46.1%]	0.415	0.39	0.49
Bradyrhizobium sp. OK095	Bradyrhizobium_japonicum_CCBAU_15354	44.8	[41.4 - 48.2%]	0.3481	4.85	36.5	[34.1 - 39.1%]	0.1119	1.06	42.5	[39.5 - 45.5%]	0.4211	0.31	0.56
Bradyrhizobium sp. OK095	Bradyrhizobium_japonicum_CCBAU_15618	46.2	[42.9 - 49.7%]	0.3362	6.39	36.4	[34 - 38.9%]	0.1124	1.02	43.6	[40.6 - 46.6%]	0.4108	0.45	0.47
Bradyrhizobium sp. OK095	Bradyrhizobium_japonicum_CCBAU_25435	48.1	[44.7 - 51.5%]	0.3212	8.98	36.4	[33.9 - 38.9%]	0.1126	1.01	45.1	[42.1 - 48.1%]	0.3976	0.7	0.41
Bradyrhizobium sp. OK095	Bradyrhizobium_japonicum_CCBAU_83623	44.9	[41.5 - 48.3%]	0.3475	4.92	36.5	[34.1 - 39.1%]	0.1119	1.06	42.5	[39.5 - 45.5%]	0.4205	0.32	0.58
Bradyrhizobium sp. OK095	Bradyrhizobium_japonicum_E109	50.4	[46.9 - 53.8%]	0.304	13.08	36.3	[33.8 - 38.8%]	0.113	0.98	46.8	[43.8 - 49.9%]	0.3827	1.18	0.23
Bradyrhizobium sp. OK095	Bradyrhizobium_japonicum_FN1	50.7	[47.3 - 54.2%]	0.3015	13.8	36.3	[33.8 - 38.8%]	0.1131	0.97	47.1	[44.1 - 50.1%]	0.3804	1.28	0.2
Bradyrhizobium sp. OK095	Bradyrhizobium_japonicum_in8p8	39.5	[36.1 - 42.9%]	0.3977	1.49	31.2	[28.8 - 33.7%]	0.1359	0.17	36.7	[33.7 - 39.7%]	0.4795	0.04	0.1
Bradyrhizobium sp. OK095	Bradyrhizobium_japonicum_Is-1	50.3	[46.9 - 53.8%]	0.3044	12.98	36.5	[34 - 39%]	0.1121	1.04	46.9	[43.9 - 49.9%]	0.3824	1.2	0.11
Bradyrhizobium sp. OK095	Bradyrhizobium_japonicum_is5	39.5	[36.2 - 43%]	0.3972	1.51	31.2	[28.8 - 33.7%]	0.1359	0.17	36.7	[33.8 - 39.8%]	0.4791	0.04	0.1
Bradyrhizobium sp. OK095	Bradyrhizobium_japonicum_Is-34	45	[41.6 - 48.4%]	0.3468	5	36.3	[33.8 - 38.8%]	0.1129	0.98	42.5	[39.5 - 45.5%]	0.4206	0.32	0.84
Bradyrhizobium sp. OK095	Bradyrhizobium_japonicum_SEMIA_5079	48.6	[45.2 - 52.1%]	0.3171	9.83	36.3	[33.9 - 38.8%]	0.1128	0.99	45.5	[42.5 - 48.5%]	0.3941	0.8	0.34
Bradyrhizobium sp. OK095	Bradyrhizobium_japonicum_USDA_4	45.5	[42.1 - 48.9%]	0.3426	5.51	34.3	[31.8 - 36.8%]	0.1214	0.52	42.3	[39.3 - 45.3%]	0.4224	0.3	0.21
Bradyrhizobium sp. OK095	Bradyrhizobium_japonicum_USDA_6	50.5	[47 - 53.9%]	0.3034	13.24	36.3	[33.8 - 38.8%]	0.113	0.97	46.9	[43.9 - 49.9%]	0.3822	1.2	0.22
Bradyrhizobium sp. OK095	Bradyrhizobium_japonicum_USDA_38	48.5	[45.1 - 52%]	0.318	9.65	36.3	[33.8 - 38.8%]	0.1129	0.98	45.4	[42.4 - 48.4%]	0.395	0.77	0.35
Bradyrhizobium sp. OK095	Bradyrhizobium_japonicum_USDA_122	50.4	[46.9 - 53.8%]	0.3041	13.05	36.5	[34.1 - 39%]	0.1121	1.04	46.9	[43.9 - 49.9%]	0.3821	1.21	0.11
Bradyrhizobium sp. OK095	Bradyrhizobium_japonicum_USDA_123	43.9	[40.5 - 47.3%]	0.3562	4.01	36.4	[34 - 39%]	0.1123	1.03	41.7	[38.7 - 44.7%]	0.4286	0.24	0.61
Bradyrhizobium sp. OK095	Bradyrhizobium_japonicum_USDA_124	50.4	[47 - 53.9%]	0.3038	13.15	35.5	[33.1 - 38.1%]	0.1159	0.78	46.6	[43.6 - 49.7%]	0.3845	1.11	0.16
Bradyrhizobium sp. OK095	Bradyrhizobium_japonicum_USDA_135	43.4	[40 - 46.8%]	0.3609	3.59	33.5	[31 - 36%]	0.1249	0.39	40.4	[37.4 - 43.4%]	0.4407	0.16	0.07
Bradyrhizobium sp. OK095	Bradyrhizobium_jicamae_PAC68	21.9	[18.7 - 25.6%]	0.6626	0	22.7	[20.4 - 25.2%]	0.1928	0	21.1	[18.3 - 24.1%]	0.7277	0	1.49
Bradyrhizobium sp. OK095	Bradyrhizobium_liaoningense_CCBAU_05525	41.1	[37.8 - 44.6%]	0.3815	2.2	33.6	[31.1 - 36.1%]	0.1244	0.41	38.6	[35.7 - 41.7%]	0.4585	0.08	0.09
Bradyrhizobium sp. OK095	Bradyrhizobium_liaoningense_CCBAU_83689	41.7	[38.3 - 45.1%]	0.3764	2.48	33.6	[31.1 - 36.1%]	0.1244	0.41	39.1	[36.1 - 42.1%]	0.454	0.1	0.05
Bradyrhizobium sp. OK095	Bradyrhizobium_liaoningense_CCNWSX0360	42.1	[38.7 - 45.5%]	0.3726	2.72	33.2	[30.8 - 35.8%]	0.1259	0.37	39.3	[36.4 - 42.4%]	0.4515	0.11	0.18
Bradyrhizobium sp. OK095	Rhizobium_lupini_HPC_L_OUTGROUP	12.7	[10 - 16%]	0.9872	0	17.8	[15.7 - 20.2%]	0.2467	0	13.1	[10.8 - 15.9%]	0.9904	0	4.67
Bradyrhizobium sp. OK095	Bradyrhizobium_manausense_BR3351	38.1	[34.7 - 41.6%]	0.4123	1.04	31.7	[29.3 - 34.2%]	0.1331	0.21	35.7	[32.8 - 38.8%]	0.4905	0.03	1.02
Bradyrhizobium sp. OK095	Bradyrhizobium_neotropicale_BR_10247	41.8	[38.5 - 45.3%]	0.3747	2.58	30.9	[28.5 - 33.4%]	0.1375	0.15	38.4	[35.5 - 41.5%]	0.4607	0.08	0.29
Bradyrhizobium sp. OK095	Bradyrhizobium_oligotrophicum_S58	21.5	[18.3 - 25.2%]	0.6722	0	22.7	[20.4 - 25.1%]	0.1933	0	20.7	[18 - 23.8%]	0.7356	0	1.24
Bradyrhizobium sp. OK095	Bradyrhizobium_pachyrhizi_BR3262	23.3	[20 - 26.9%]	0.6329	0	23.6	[21.3 - 26.1%]	0.1851	0	22.3	[19.5 - 25.3%]	0.7009	0	0.12
Bradyrhizobium sp. OK095	Bradyrhizobium_pachyrhizi_PAC_48	23.6	[20.3 - 27.2%]	0.6263	0.01	23.5	[21.2 - 26%]	0.1861	0	22.5	[19.7 - 25.6%]	0.6958	0	0.13
Bradyrhizobium sp. OK095	Bradyrhizobium_paxllaeri_LMTR_21	22.3	[19 - 25.9%]	0.6552	0	22.7	[20.5 - 25.2%]	0.1926	0	21.3	[18.6 - 24.4%]	0.7216	0	1.4
[truncated: 6,388 more rows]

## Sheet: ANIb_comparisons_Bradyrhizobium
Supplementary Data S1. GBDP and ANIb comparisons of Bradyrhizobium genomes.
Referene genome	Subject genome	ANIb	Distance
Bradyrhizobium_yuanmingense_CCBAU_10071	Bradyrhizobium_yuanmingense_CCBAU_25021	0.9993	0.0007
Bradyrhizobium_yuanmingense_CCBAU_10071	Bradyrhizobium_yuanmingense_CGMCC_1_3531	1	0
Bradyrhizobium_yuanmingense_CCBAU_10071	Bradyrhizobium_yuanmingense_CCBAU_35157	0.982	0.018
Bradyrhizobium_yuanmingense_CCBAU_10071	Bradyrhizobium_yuanmingense_CCBAU_05623	0.9701	0.0299
Bradyrhizobium_yuanmingense_CCBAU_10071	Bradyrhizobium_yuanmingense_BR3267	0.9786	0.0214
Bradyrhizobium_yuanmingense_CCBAU_10071	Bradyrhizobium_sp_DOA9	0.9348	0.0652
Bradyrhizobium_yuanmingense_CCBAU_10071	Bradyrhizobium_sp_WSM1743	0.9102	0.0898
Bradyrhizobium_yuanmingense_CCBAU_10071	Bradyrhizobium_japonicum_in8p8	0.8949	0.1051
Bradyrhizobium_yuanmingense_CCBAU_10071	Bradyrhizobium_japonicum_is5	0.8957	0.1043
Bradyrhizobium_yuanmingense_CCBAU_10071	Bradyrhizobium_sp_Leaf396	0.8923	0.1077
Bradyrhizobium_yuanmingense_CCBAU_10071	Bradyrhizobium_japonicum_USDA_135	0.9064	0.0936
Bradyrhizobium_yuanmingense_CCBAU_10071	Bradyrhizobium_liaoningense_CCBAU_05525	0.8893	0.1107
Bradyrhizobium_yuanmingense_CCBAU_10071	Bradyrhizobium_liaoningense_CCBAU_83689	0.9126	0.0874
Bradyrhizobium_yuanmingense_CCBAU_10071	Bradyrhizobium_liaoningense_CCNWSX0360	0.9031	0.0969
Bradyrhizobium_yuanmingense_CCBAU_10071	Bradyrhizobium_sp_CCBAU_43298	0.8817	0.1183
Bradyrhizobium_yuanmingense_CCBAU_10071	Bradyrhizobium_sp_CCH5-F6	0.8981	0.1019
Bradyrhizobium_yuanmingense_CCBAU_10071	Bradyrhizobium_sp_CCGE-LA001	0.8919	0.1081
Bradyrhizobium_yuanmingense_CCBAU_10071	Bradyrhizobium_sp_DOA1	0.891	0.109
Bradyrhizobium_yuanmingense_CCBAU_10071	Bradyrhizobium_daqingense_CGMCC_1_10947	0.8912	0.1088
Bradyrhizobium_yuanmingense_CCBAU_10071	Bradyrhizobium_sp_Rc2d	0.8932	0.1068
Bradyrhizobium_yuanmingense_CCBAU_10071	Bradyrhizobium_sp_CCBAU_15544	0.8937	0.1063
Bradyrhizobium_yuanmingense_CCBAU_10071	Bradyrhizobium_sp_CCBAU_15635	0.8934	0.1066
Bradyrhizobium_yuanmingense_CCBAU_10071	Bradyrhizobium_japonicum_USDA_4	0.8934	0.1066
Bradyrhizobium_yuanmingense_CCBAU_10071	Bradyrhizobium_sp_CCBAU_15615	0.8933	0.1067
Bradyrhizobium_yuanmingense_CCBAU_10071	Bradyrhizobium_sp_ERR11	0.8935	0.1065
Bradyrhizobium_yuanmingense_CCBAU_10071	Bradyrhizobium_sp_Rc3b	0.8941	0.1059
Bradyrhizobium_yuanmingense_CCBAU_10071	Bradyrhizobium_sp_WSM2793	0.8944	0.1056
Bradyrhizobium_yuanmingense_CCBAU_10071	Bradyrhizobium_japonicum_22	0.897	0.103
Bradyrhizobium_yuanmingense_CCBAU_10071	Bradyrhizobium_sp_AT1	0.8931	0.1069
Bradyrhizobium_yuanmingense_CCBAU_10071	Bradyrhizobium_diazoefficiens_SEMIA_5080	0.8927	0.1073
Bradyrhizobium_yuanmingense_CCBAU_10071	Bradyrhizobium_japonicum_USDA_122	0.8927	0.1073
Bradyrhizobium_yuanmingense_CCBAU_10071	Bradyrhizobium_japonicum_Is-1	0.8927	0.1073
Bradyrhizobium_yuanmingense_CCBAU_10071	Bradyrhizobium_diazoefficiens_NK6	0.8935	0.1065
Bradyrhizobium_yuanmingense_CCBAU_10071	Bradyrhizobium_sp_CCBAU_41267	0.8921	0.1079
Bradyrhizobium_yuanmingense_CCBAU_10071	Bradyrhizobium_diazoefficiens_USDA_110	0.8924	0.1076
Bradyrhizobium_yuanmingense_CCBAU_10071	Bradyrhizobium_sp_WSM2254	0.8915	0.1085
Bradyrhizobium_yuanmingense_CCBAU_10071	Bradyrhizobium_sp_CF659	0.8921	0.1079
Bradyrhizobium_yuanmingense_CCBAU_10071	Bradyrhizobium_sp_YR681	0.8881	0.1119
Bradyrhizobium_yuanmingense_CCBAU_10071	Bradyrhizobium_huanghuaihaiense_CGMCC_1_10948	0.8955	0.1045
Bradyrhizobium_yuanmingense_CCBAU_10071	Bradyrhizobium_japonicum_USDA_124	0.8956	0.1044
Bradyrhizobium_yuanmingense_CCBAU_10071	Bradyrhizobium_stylosanthis_BR_446	0.8916	0.1084
Bradyrhizobium_yuanmingense_CCBAU_10071	Bradyrhizobium_arachidis_LMG_26795	0.8902	0.1098
Bradyrhizobium_yuanmingense_CCBAU_10071	Bradyrhizobium_sp_USDA_3384	0.8898	0.1102
Bradyrhizobium_yuanmingense_CCBAU_10071	Bradyrhizobium_japonicum_E109	0.887	0.113
Bradyrhizobium_yuanmingense_CCBAU_10071	Bradyrhizobium_japonicum_FN1	0.887	0.113
Bradyrhizobium_yuanmingense_CCBAU_10071	Bradyrhizobium_japonicum_USDA_6	0.887	0.113
Bradyrhizobium_yuanmingense_CCBAU_10071	Bradyrhizobium_japonicum_CCBAU_25435	0.8861	0.1139
Bradyrhizobium_yuanmingense_CCBAU_10071	Bradyrhizobium_japonicum_SEMIA_5079	0.887	0.113
Bradyrhizobium_yuanmingense_CCBAU_10071	Bradyrhizobium_japonicum_CCBAU_15618	0.8851	0.1149
Bradyrhizobium_yuanmingense_CCBAU_10071	Bradyrhizobium_japonicum_Is-34	0.886	0.114
Bradyrhizobium_yuanmingense_CCBAU_10071	Bradyrhizobium_japonicum_USDA_38	0.8865	0.1135
Bradyrhizobium_yuanmingense_CCBAU_10071	Bradyrhizobium_japonicum_USDA_123	0.8855	0.1145
Bradyrhizobium_yuanmingense_CCBAU_10071	Bradyrhizobium_japonicum_CCBAU_15354	0.8861	0.1139
Bradyrhizobium_yuanmingense_CCBAU_10071	Bradyrhizobium_japonicum_CCBA_15517	0.886	0.114
Bradyrhizobium_yuanmingense_CCBAU_10071	Bradyrhizobium_japonicum_CCBAU_83623	0.8865	0.1135
Bradyrhizobium_yuanmingense_CCBAU_10071	Bradyrhizobium_sp_G22	0.8866	0.1134
Bradyrhizobium_yuanmingense_CCBAU_10071	Bradyrhizobium_sp_OK095	0.8827	0.1173
Bradyrhizobium_yuanmingense_CCBAU_10071	Bradyrhizobium_sp_S23321	0.8816	0.1184
Bradyrhizobium_yuanmingense_CCBAU_10071	Bradyrhizobium_sp_BF49	0.881	0.119
Bradyrhizobium_yuanmingense_CCBAU_10071	Bradyrhizobium_sp_WSM471	0.8795	0.1205
Bradyrhizobium_yuanmingense_CCBAU_10071	Bradyrhizobium_sp_WSM1253	0.8805	0.1195
Bradyrhizobium_yuanmingense_CCBAU_10071	Bradyrhizobium_sp_URHA0013	0.881	0.119
Bradyrhizobium_yuanmingense_CCBAU_10071	Bradyrhizobium_sp_WSM1417	0.8818	0.1182
Bradyrhizobium_yuanmingense_CCBAU_10071	Bradyrhizobium_sp_WSM4349	0.8794	0.1206
Bradyrhizobium_yuanmingense_CCBAU_10071	Bradyrhizobium_sp_LTSP849	0.8751	0.1249
Bradyrhizobium_yuanmingense_CCBAU_10071	Bradyrhizobium_sp_LTSP857	0.8751	0.1249
Bradyrhizobium_yuanmingense_CCBAU_10071	Bradyrhizobium_sp_WSM3983	0.8754	0.1246
Bradyrhizobium_yuanmingense_CCBAU_10071	Bradyrhizobium_sp_Gha	0.8689	0.1311
Bradyrhizobium_yuanmingense_CCBAU_10071	Bradyrhizobium_sp_Cp5_3	0.8729	0.1271
Bradyrhizobium_yuanmingense_CCBAU_10071	Bradyrhizobium_neotropicale_BR_10247	0.8719	0.1281
Bradyrhizobium_yuanmingense_CCBAU_10071	Bradyrhizobium_manausense_BR3351	0.8736	0.1264
Bradyrhizobium_yuanmingense_CCBAU_10071	Bradyrhizobium_sp_Ghvi	0.8747	0.1253
Bradyrhizobium_yuanmingense_CCBAU_10071	Bradyrhizobium_sp_BR_10245	0.873	0.127
Bradyrhizobium_yuanmingense_CCBAU_10071	Bradyrhizobium_sp_Ec3_3	0.8568	0.1432
Bradyrhizobium_yuanmingense_CCBAU_10071	Bradyrhizobium_elkanii_587	0.8223	0.1777
Bradyrhizobium_yuanmingense_CCBAU_10071	Bradyrhizobium_elkanii_CCBAU_05737	0.8241	0.1759
Bradyrhizobium_yuanmingense_CCBAU_10071	Bradyrhizobium_elkanii_USDA_94	0.8242	0.1758
Bradyrhizobium_yuanmingense_CCBAU_10071	Bradyrhizobium_elkanii_BLY6-1	0.8238	0.1762
Bradyrhizobium_yuanmingense_CCBAU_10071	Bradyrhizobium_elkanii_BLY3-8	0.8238	0.1762
Bradyrhizobium_yuanmingense_CCBAU_10071	Bradyrhizobium_elkanii_USDA_76	0.824	0.176
Bradyrhizobium_yuanmingense_CCBAU_10071	Bradyrhizobium_elkanii_CCBAU_43297	0.8235	0.1765
Bradyrhizobium_yuanmingense_CCBAU_10071	Bradyrhizobium_elkanii_USDA_3254	0.8247	0.1753
Bradyrhizobium_yuanmingense_CCBAU_10071	Bradyrhizobium_elkanii_USDA_3259	0.8251	0.1749
Bradyrhizobium_yuanmingense_CCBAU_10071	Bradyrhizobium_pachyrhizi_PAC_48	0.8246	0.1754
Bradyrhizobium_yuanmingense_CCBAU_10071	Bradyrhizobium_sp_R5	0.8246	0.1754
Bradyrhizobium_yuanmingense_CCBAU_10071	Bradyrhizobium_pachyrhizi_BR3262	0.8257	0.1743
Bradyrhizobium_yuanmingense_CCBAU_10071	Bradyrhizobium_sp_DFCI-1	0.8255	0.1745
Bradyrhizobium_yuanmingense_CCBAU_10071	Bradyrhizobium_sp_17-4	0.8306	0.1694
Bradyrhizobium_yuanmingense_CCBAU_10071	Bradyrhizobium_viridifuturi_SEMIA_690	0.8253	0.1747
Bradyrhizobium_yuanmingense_CCBAU_10071	Bradyrhizobium_tropiciagri_SEMIA_6148	0.8251	0.1749
Bradyrhizobium_yuanmingense_CCBAU_10071	Bradyrhizobium_erythrophlei_MT12	0.825	0.175
Bradyrhizobium_yuanmingense_CCBAU_10071	Bradyrhizobium_embrapense_SEMIA_6208	0.8255	0.1745
Bradyrhizobium_yuanmingense_CCBAU_10071	Bradyrhizobium_elkanii_UASWS1015	0.8242	0.1758
Bradyrhizobium_yuanmingense_CCBAU_10071	Bradyrhizobium_sp_OHSU_III	0.8247	0.1753
Bradyrhizobium_yuanmingense_CCBAU_10071	Bradyrhizobium_sp_th_b2	0.8236	0.1764
Bradyrhizobium_yuanmingense_CCBAU_10071	Bradyrhizobium_sp_LTSP885	0.82	0.18
Bradyrhizobium_yuanmingense_CCBAU_10071	Bradyrhizobium_sp_LTSPM299	0.8207	0.1793
Bradyrhizobium_yuanmingense_CCBAU_10071	Bradyrhizobium_sp_BR_10303	0.821	0.179
Bradyrhizobium_yuanmingense_CCBAU_10071	Bradyrhizobium_sp_Ai1a-2	0.8184	0.1816
Bradyrhizobium_yuanmingense_CCBAU_10071	Bradyrhizobium_elkanii_WSM2783	0.8199	0.1801
Bradyrhizobium_yuanmingense_CCBAU_10071	Bradyrhizobium_sp_ORS_278	0.8171	0.1829
Bradyrhizobium_yuanmingense_CCBAU_10071	Bradyrhizobium_sp_ORS_375	0.8176	0.1824
Bradyrhizobium_yuanmingense_CCBAU_10071	Bradyrhizobium_sp_STM_3809	0.82	0.18
Bradyrhizobium_yuanmingense_CCBAU_10071	Bradyrhizobium_sp_BTAi1	0.8145	0.1855
Bradyrhizobium_yuanmingense_CCBAU_10071	Bradyrhizobium_oligotrophicum_S58	0.8177	0.1823
Bradyrhizobium_yuanmingense_CCBAU_10071	Bradyrhizobium_sp_ORS_285	0.8187	0.1813
Bradyrhizobium_yuanmingense_CCBAU_10071	Bradyrhizobium_sp_STM_3843	0.8129	0.1871
Bradyrhizobium_yuanmingense_CCBAU_10071	Bradyrhizobium_sp_Tv2a-2	0.8155	0.1845
Bradyrhizobium_yuanmingense_CCBAU_10071	Bradyrhizobium_sp_ARR65	0.8117	0.1883
Bradyrhizobium_yuanmingense_CCBAU_10071	Bradyrhizobium_elkanii_WSM1741	0.8141	0.1859
Bradyrhizobium_yuanmingense_CCBAU_10071	Bradyrhizobium_retamae_Ro19	0.8133	0.1867
Bradyrhizobium_yuanmingense_CCBAU_10071	Bradyrhizobium_sp_LMTR_3	0.8148	0.1852
Bradyrhizobium_yuanmingense_CCBAU_10071	Bradyrhizobium_icense_LMTR_13	0.813	0.187
Bradyrhizobium_yuanmingense_CCBAU_10071	Bradyrhizobium_valentinum_LmjM3	0.8132	0.1868
Bradyrhizobium_yuanmingense_CCBAU_10071	Bradyrhizobium_valentinum_LmjM6	0.8127	0.1873
Bradyrhizobium_yuanmingense_CCBAU_10071	Bradyrhizobium_jicamae_PAC68	0.8172	0.1828
Bradyrhizobium_yuanmingense_CCBAU_10071	Bradyrhizobium_paxllaeri_LMTR_21	0.8179	0.1821
Bradyrhizobium_yuanmingense_CCBAU_10071	Bradyrhizobium_lablabi_GAS522	0.8169	0.1831
Bradyrhizobium_yuanmingense_CCBAU_10071	Bradyrhizobium_ottawaense_GAS524	0.8169	0.1831
Bradyrhizobium_yuanmingense_CCBAU_10071	Bradyrhizobium_sp_URHA0002	0.8112	0.1888
Bradyrhizobium_yuanmingense_CCBAU_10071	Bradyrhizobium_erythrophlei_GAS138	0.8073	0.1927
Bradyrhizobium_yuanmingense_CCBAU_10071	Bradyrhizobium_sp_URHD0069	0.7998	0.2002
Bradyrhizobium_yuanmingense_CCBAU_10071	Bradyrhizobium_canariense_GAS369	0.8052	0.1948
Bradyrhizobium_yuanmingense_CCBAU_10071	Bradyrhizobium_erythrophlei_GAS242	0.8123	0.1877
Bradyrhizobium_yuanmingense_CCBAU_10071	Bradyrhizobium_erythrophlei_GAS401	0.8014	0.1986
Bradyrhizobium_yuanmingense_CCBAU_10071	Bradyrhizobium_sp_CCH4-A6	0.7743	0.2257
Bradyrhizobium_yuanmingense_CCBAU_10071	Bradyrhizobium_sp_CCH10-C7	0.7754	0.2246
Bradyrhizobium_yuanmingense_CCBAU_10071	Rhizobium_lupini_HPC_L	0.7352	0.2648
Bradyrhizobium_yuanmingense_CCBAU_10071	Mesorhizobium_ciceri_WSM1271	0.7532	0.2468
Bradyrhizobium_yuanmingense_CCBAU_25021	Bradyrhizobium_yuanmingense_CGMCC_1_3531	0.9997	0.0003
Bradyrhizobium_yuanmingense_CCBAU_25021	Bradyrhizobium_yuanmingense_CCBAU_35157	0.9837	0.0163
Bradyrhizobium_yuanmingense_CCBAU_25021	Bradyrhizobium_yuanmingense_CCBAU_05623	0.9708	0.0292
Bradyrhizobium_yuanmingense_CCBAU_25021	Bradyrhizobium_yuanmingense_BR3267	0.9814	0.0186
Bradyrhizobium_yuanmingense_CCBAU_25021	Bradyrhizobium_sp_DOA9	0.932	0.068
Bradyrhizobium_yuanmingense_CCBAU_25021	Bradyrhizobium_sp_WSM1743	0.9084	0.0916
Bradyrhizobium_yuanmingense_CCBAU_25021	Bradyrhizobium_japonicum_in8p8	0.8954	0.1046
Bradyrhizobium_yuanmingense_CCBAU_25021	Bradyrhizobium_japonicum_is5	0.896	0.104
Bradyrhizobium_yuanmingense_CCBAU_25021	Bradyrhizobium_sp_Leaf396	0.8922	0.1078
Bradyrhizobium_yuanmingense_CCBAU_25021	Bradyrhizobium_japonicum_USDA_135	0.9057	0.0943
Bradyrhizobium_yuanmingense_CCBAU_25021	Bradyrhizobium_liaoningense_CCBAU_05525	0.8881	0.1119
Bradyrhizobium_yuanmingense_CCBAU_25021	Bradyrhizobium_liaoningense_CCBAU_83689	0.9126	0.0874
Bradyrhizobium_yuanmingense_CCBAU_25021	Bradyrhizobium_liaoningense_CCNWSX0360	0.9029	0.0971
Bradyrhizobium_yuanmingense_CCBAU_25021	Bradyrhizobium_sp_CCBAU_43298	0.88	0.12
Bradyrhizobium_yuanmingense_CCBAU_25021	Bradyrhizobium_sp_CCH5-F6	0.8979	0.1021
Bradyrhizobium_yuanmingense_CCBAU_25021	Bradyrhizobium_sp_CCGE-LA001	0.8923	0.1077
Bradyrhizobium_yuanmingense_CCBAU_25021	Bradyrhizobium_sp_DOA1	0.8933	0.1067
Bradyrhizobium_yuanmingense_CCBAU_25021	Bradyrhizobium_daqingense_CGMCC_1_10947	0.8872	0.1128
Bradyrhizobium_yuanmingense_CCBAU_25021	Bradyrhizobium_sp_Rc2d	0.8939	0.1061
Bradyrhizobium_yuanmingense_CCBAU_25021	Bradyrhizobium_sp_CCBAU_15544	0.8928	0.1072
Bradyrhizobium_yuanmingense_CCBAU_25021	Bradyrhizobium_sp_CCBAU_15635	0.8939	0.1061
Bradyrhizobium_yuanmingense_CCBAU_25021	Bradyrhizobium_japonicum_USDA_4	0.8928	0.1072
Bradyrhizobium_yuanmingense_CCBAU_25021	Bradyrhizobium_sp_CCBAU_15615	0.8931	0.1069
Bradyrhizobium_yuanmingense_CCBAU_25021	Bradyrhizobium_sp_ERR11	0.8878	0.1122
Bradyrhizobium_yuanmingense_CCBAU_25021	Bradyrhizobium_sp_Rc3b	0.894	0.106
Bradyrhizobium_yuanmingense_CCBAU_25021	Bradyrhizobium_sp_WSM2793	0.8935	0.1065
Bradyrhizobium_yuanmingense_CCBAU_25021	Bradyrhizobium_japonicum_22	0.8888	0.1112
Bradyrhizobium_yuanmingense_CCBAU_25021	Bradyrhizobium_sp_AT1	0.89	0.11
Bradyrhizobium_yuanmingense_CCBAU_25021	Bradyrhizobium_diazoefficiens_SEMIA_5080	0.8927	0.1073
Bradyrhizobium_yuanmingense_CCBAU_25021	Bradyrhizobium_japonicum_USDA_122	0.8927	0.1073
Bradyrhizobium_yuanmingense_CCBAU_25021	Bradyrhizobium_japonicum_Is-1	0.8927	0.1073
Bradyrhizobium_yuanmingense_CCBAU_25021	Bradyrhizobium_diazoefficiens_NK6	0.8916	0.1084
Bradyrhizobium_yuanmingense_CCBAU_25021	Bradyrhizobium_sp_CCBAU_41267	0.8926	0.1074
Bradyrhizobium_yuanmingense_CCBAU_25021	Bradyrhizobium_diazoefficiens_USDA_110	0.8935	0.1065
Bradyrhizobium_yuanmingense_CCBAU_25021	Bradyrhizobium_sp_WSM2254	0.8923	0.1077
Bradyrhizobium_yuanmingense_CCBAU_25021	Bradyrhizobium_sp_CF659	0.8923	0.1077
Bradyrhizobium_yuanmingense_CCBAU_25021	Bradyrhizobium_sp_YR681	0.8851	0.1149
Bradyrhizobium_yuanmingense_CCBAU_25021	Bradyrhizobium_huanghuaihaiense_CGMCC_1_10948	0.8975	0.1025
Bradyrhizobium_yuanmingense_CCBAU_25021	Bradyrhizobium_japonicum_USDA_124	0.8983	0.1017
Bradyrhizobium_yuanmingense_CCBAU_25021	Bradyrhizobium_stylosanthis_BR_446	0.8944	0.1056
Bradyrhizobium_yuanmingense_CCBAU_25021	Bradyrhizobium_arachidis_LMG_26795	0.888	0.112
Bradyrhizobium_yuanmingense_CCBAU_25021	Bradyrhizobium_sp_USDA_3384	0.8866	0.1134
Bradyrhizobium_yuanmingense_CCBAU_25021	Bradyrhizobium_japonicum_E109	0.8838	0.1162
Bradyrhizobium_yuanmingense_CCBAU_25021	Bradyrhizobium_japonicum_FN1	0.8842	0.1158
Bradyrhizobium_yuanmingense_CCBAU_25021	Bradyrhizobium_japonicum_USDA_6	0.8839	0.1161
Bradyrhizobium_yuanmingense_CCBAU_25021	Bradyrhizobium_japonicum_CCBAU_25435	0.8835	0.1165
Bradyrhizobium_yuanmingense_CCBAU_25021	Bradyrhizobium_japonicum_SEMIA_5079	0.8853	0.1147
Bradyrhizobium_yuanmingense_CCBAU_25021	Bradyrhizobium_japonicum_CCBAU_15618	0.8841	0.1159
Bradyrhizobium_yuanmingense_CCBAU_25021	Bradyrhizobium_japonicum_Is-34	0.8847	0.1153
Bradyrhizobium_yuanmingense_CCBAU_25021	Bradyrhizobium_japonicum_USDA_38	0.8851	0.1149
Bradyrhizobium_yuanmingense_CCBAU_25021	Bradyrhizobium_japonicum_USDA_123	0.885	0.115
Bradyrhizobium_yuanmingense_CCBAU_25021	Bradyrhizobium_japonicum_CCBAU_15354	0.886	0.114
Bradyrhizobium_yuanmingense_CCBAU_25021	Bradyrhizobium_japonicum_CCBA_15517	0.8861	0.1139
Bradyrhizobium_yuanmingense_CCBAU_25021	Bradyrhizobium_japonicum_CCBAU_83623	0.8854	0.1146
Bradyrhizobium_yuanmingense_CCBAU_25021	Bradyrhizobium_sp_G22	0.8846	0.1154
Bradyrhizobium_yuanmingense_CCBAU_25021	Bradyrhizobium_sp_OK095	0.8792	0.1208
Bradyrhizobium_yuanmingense_CCBAU_25021	Bradyrhizobium_sp_S23321	0.8799	0.1201
Bradyrhizobium_yuanmingense_CCBAU_25021	Bradyrhizobium_sp_BF49	0.8745	0.1255
Bradyrhizobium_yuanmingense_CCBAU_25021	Bradyrhizobium_sp_WSM471	0.8753	0.1247
Bradyrhizobium_yuanmingense_CCBAU_25021	Bradyrhizobium_sp_WSM1253	0.8778	0.1222
Bradyrhizobium_yuanmingense_CCBAU_25021	Bradyrhizobium_sp_URHA0013	0.8757	0.1243
Bradyrhizobium_yuanmingense_CCBAU_25021	Bradyrhizobium_sp_WSM1417	0.879	0.121
Bradyrhizobium_yuanmingense_CCBAU_25021	Bradyrhizobium_sp_WSM4349	0.8732	0.1268
Bradyrhizobium_yuanmingense_CCBAU_25021	Bradyrhizobium_sp_LTSP849	0.8728	0.1272
Bradyrhizobium_yuanmingense_CCBAU_25021	Bradyrhizobium_sp_LTSP857	0.8719	0.1281
Bradyrhizobium_yuanmingense_CCBAU_25021	Bradyrhizobium_sp_WSM3983	0.8729	0.1271
Bradyrhizobium_yuanmingense_CCBAU_25021	Bradyrhizobium_sp_Gha	0.8629	0.1371
Bradyrhizobium_yuanmingense_CCBAU_25021	Bradyrhizobium_sp_Cp5_3	0.8735	0.1265
Bradyrhizobium_yuanmingense_CCBAU_25021	Bradyrhizobium_neotropicale_BR_10247	0.8729	0.1271
Bradyrhizobium_yuanmingense_CCBAU_25021	Bradyrhizobium_manausense_BR3351	0.8722	0.1278
Bradyrhizobium_yuanmingense_CCBAU_25021	Bradyrhizobium_sp_Ghvi	0.8768	0.1232
Bradyrhizobium_yuanmingense_CCBAU_25021	Bradyrhizobium_sp_BR_10245	0.8737	0.1263
Bradyrhizobium_yuanmingense_CCBAU_25021	Bradyrhizobium_sp_Ec3_3	0.8618	0.1382
Bradyrhizobium_yuanmingense_CCBAU_25021	Bradyrhizobium_elkanii_587	0.8274	0.1726
Bradyrhizobium_yuanmingense_CCBAU_25021	Bradyrhizobium_elkanii_CCBAU_05737	0.828	0.172
Bradyrhizobium_yuanmingense_CCBAU_25021	Bradyrhizobium_elkanii_USDA_94	0.8301	0.1699
Bradyrhizobium_yuanmingense_CCBAU_25021	Bradyrhizobium_elkanii_BLY6-1	0.8269	0.1731
Bradyrhizobium_yuanmingense_CCBAU_25021	Bradyrhizobium_elkanii_BLY3-8	0.8273	0.1727
Bradyrhizobium_yuanmingense_CCBAU_25021	Bradyrhizobium_elkanii_USDA_76	0.8328	0.1672
Bradyrhizobium_yuanmingense_CCBAU_25021	Bradyrhizobium_elkanii_CCBAU_43297	0.8325	0.1675
Bradyrhizobium_yuanmingense_CCBAU_25021	Bradyrhizobium_elkanii_USDA_3254	0.8291	0.1709
Bradyrhizobium_yuanmingense_CCBAU_25021	Bradyrhizobium_elkanii_USDA_3259	0.8291	0.1709
Bradyrhizobium_yuanmingense_CCBAU_25021	Bradyrhizobium_pachyrhizi_PAC_48	0.8283	0.1717
Bradyrhizobium_yuanmingense_CCBAU_25021	Bradyrhizobium_sp_R5	0.8306	0.1694
Bradyrhizobium_yuanmingense_CCBAU_25021	Bradyrhizobium_pachyrhizi_BR3262	0.8287	0.1713
Bradyrhizobium_yuanmingense_CCBAU_25021	Bradyrhizobium_sp_DFCI-1	0.8275	0.1725
Bradyrhizobium_yuanmingense_CCBAU_25021	Bradyrhizobium_sp_17-4	0.8299	0.1701
Bradyrhizobium_yuanmingense_CCBAU_25021	Bradyrhizobium_viridifuturi_SEMIA_690	0.8275	0.1725
Bradyrhizobium_yuanmingense_CCBAU_25021	Bradyrhizobium_tropiciagri_SEMIA_6148	0.8301	0.1699
Bradyrhizobium_yuanmingense_CCBAU_25021	Bradyrhizobium_erythrophlei_MT12	0.8174	0.1826
Bradyrhizobium_yuanmingense_CCBAU_25021	Bradyrhizobium_embrapense_SEMIA_6208	0.8159	0.1841
Bradyrhizobium_yuanmingense_CCBAU_25021	Bradyrhizobium_elkanii_UASWS1015	0.8169	0.1831
Bradyrhizobium_yuanmingense_CCBAU_25021	Bradyrhizobium_sp_OHSU_III	0.8163	0.1837
Bradyrhizobium_yuanmingense_CCBAU_25021	Bradyrhizobium_sp_th_b2	0.8247	0.1753
Bradyrhizobium_yuanmingense_CCBAU_25021	Bradyrhizobium_sp_LTSP885	0.8172	0.1828
Bradyrhizobium_yuanmingense_CCBAU_25021	Bradyrhizobium_sp_LTSPM299	0.8166	0.1834
Bradyrhizobium_yuanmingense_CCBAU_25021	Bradyrhizobium_sp_BR_10303	0.8225	0.1775
Bradyrhizobium_yuanmingense_CCBAU_25021	Bradyrhizobium_sp_Ai1a-2	0.8231	0.1769
Bradyrhizobium_yuanmingense_CCBAU_25021	Bradyrhizobium_elkanii_WSM2783	0.824	0.176
Bradyrhizobium_yuanmingense_CCBAU_25021	Bradyrhizobium_sp_ORS_278	0.8085	0.1915
Bradyrhizobium_yuanmingense_CCBAU_25021	Bradyrhizobium_sp_ORS_375	0.8115	0.1885
Bradyrhizobium_yuanmingense_CCBAU_25021	Bradyrhizobium_sp_STM_3809	0.8116	0.1884
Bradyrhizobium_yuanmingense_CCBAU_25021	Bradyrhizobium_sp_BTAi1	0.8072	0.1928
Bradyrhizobium_yuanmingense_CCBAU_25021	Bradyrhizobium_oligotrophicum_S58	0.8087	0.1913
Bradyrhizobium_yuanmingense_CCBAU_25021	Bradyrhizobium_sp_ORS_285	0.8162	0.1838
Bradyrhizobium_yuanmingense_CCBAU_25021	Bradyrhizobium_sp_STM_3843	0.8166	0.1834
Bradyrhizobium_yuanmingense_CCBAU_25021	Bradyrhizobium_sp_Tv2a-2	0.8211	0.1789
Bradyrhizobium_yuanmingense_CCBAU_25021	Bradyrhizobium_sp_ARR65	0.8205	0.1795
Bradyrhizobium_yuanmingense_CCBAU_25021	Bradyrhizobium_elkanii_WSM1741	0.8189	0.1811
Bradyrhizobium_yuanmingense_CCBAU_25021	Bradyrhizobium_retamae_Ro19	0.8169	0.1831
Bradyrhizobium_yuanmingense_CCBAU_25021	Bradyrhizobium_sp_LMTR_3	0.8185	0.1815
Bradyrhizobium_yuanmingense_CCBAU_25021	Bradyrhizobium_icense_LMTR_13	0.8154	0.1846
Bradyrhizobium_yuanmingense_CCBAU_25021	Bradyrhizobium_valentinum_LmjM3	0.8156	0.1844
Bradyrhizobium_yuanmingense_CCBAU_25021	Bradyrhizobium_valentinum_LmjM6	0.8156	0.1844
Bradyrhizobium_yuanmingense_CCBAU_25021	Bradyrhizobium_jicamae_PAC68	0.8118	0.1882
Bradyrhizobium_yuanmingense_CCBAU_25021	Bradyrhizobium_paxllaeri_LMTR_21	0.8158	0.1842
Bradyrhizobium_yuanmingense_CCBAU_25021	Bradyrhizobium_lablabi_GAS522	0.8152	0.1848
Bradyrhizobium_yuanmingense_CCBAU_25021	Bradyrhizobium_ottawaense_GAS524	0.8152	0.1848
Bradyrhizobium_yuanmingense_CCBAU_25021	Bradyrhizobium_sp_URHA0002	0.8138	0.1862
Bradyrhizobium_yuanmingense_CCBAU_25021	Bradyrhizobium_erythrophlei_GAS138	0.799	0.201
Bradyrhizobium_yuanmingense_CCBAU_25021	Bradyrhizobium_sp_URHD0069	0.7904	0.2096
Bradyrhizobium_yuanmingense_CCBAU_25021	Bradyrhizobium_canariense_GAS369	0.7976	0.2024
Bradyrhizobium_yuanmingense_CCBAU_25021	Bradyrhizobium_erythrophlei_GAS242	0.8115	0.1885
Bradyrhizobium_yuanmingense_CCBAU_25021	Bradyrhizobium_erythrophlei_GAS401	0.8038	0.1962
Bradyrhizobium_yuanmingense_CCBAU_25021	Bradyrhizobium_sp_CCH4-A6	0.7695	0.2305
Bradyrhizobium_yuanmingense_CCBAU_25021	Bradyrhizobium_sp_CCH10-C7	0.7698	0.2302
Bradyrhizobium_yuanmingense_CCBAU_25021	Rhizobium_lupini_HPC_L	0.7303	0.2697
Bradyrhizobium_yuanmingense_CCBAU_25021	Mesorhizobium_ciceri_WSM1271	0.7556	0.2444
Bradyrhizobium_yuanmingense_CGMCC_1_3531	Bradyrhizobium_yuanmingense_CCBAU_35157	0.9834	0.0166
Bradyrhizobium_yuanmingense_CGMCC_1_3531	Bradyrhizobium_yuanmingense_CCBAU_05623	0.974	0.026
Bradyrhizobium_yuanmingense_CGMCC_1_3531	Bradyrhizobium_yuanmingense_BR3267	0.9807	0.0193
Bradyrhizobium_yuanmingense_CGMCC_1_3531	Bradyrhizobium_sp_DOA9	0.9383	0.0617
Bradyrhizobium_yuanmingense_CGMCC_1_3531	Bradyrhizobium_sp_WSM1743	0.9158	0.0842
Bradyrhizobium_yuanmingense_CGMCC_1_3531	Bradyrhizobium_japonicum_in8p8	0.8949	0.1051
Bradyrhizobium_yuanmingense_CGMCC_1_3531	Bradyrhizobium_japonicum_is5	0.8957	0.1043
Bradyrhizobium_yuanmingense_CGMCC_1_3531	Bradyrhizobium_sp_Leaf396	0.8923	0.1077
Bradyrhizobium_yuanmingense_CGMCC_1_3531	Bradyrhizobium_japonicum_USDA_135	0.9063	0.0937
Bradyrhizobium_yuanmingense_CGMCC_1_3531	Bradyrhizobium_liaoningense_CCBAU_05525	0.8893	0.1107
Bradyrhizobium_yuanmingense_CGMCC_1_3531	Bradyrhizobium_liaoningense_CCBAU_83689	0.9126	0.0874
Bradyrhizobium_yuanmingense_CGMCC_1_3531	Bradyrhizobium_liaoningense_CCNWSX0360	0.9031	0.0969
Bradyrhizobium_yuanmingense_CGMCC_1_3531	Bradyrhizobium_sp_CCBAU_43298	0.8817	0.1183
Bradyrhizobium_yuanmingense_CGMCC_1_3531	Bradyrhizobium_sp_CCH5-F6	0.8982	0.1018
Bradyrhizobium_yuanmingense_CGMCC_1_3531	Bradyrhizobium_sp_CCGE-LA001	0.8989	0.1011
Bradyrhizobium_yuanmingense_CGMCC_1_3531	Bradyrhizobium_sp_DOA1	0.8987	0.1013
Bradyrhizobium_yuanmingense_CGMCC_1_3531	Bradyrhizobium_daqingense_CGMCC_1_10947	0.8979	0.1021
Bradyrhizobium_yuanmingense_CGMCC_1_3531	Bradyrhizobium_sp_Rc2d	0.8992	0.1008
Bradyrhizobium_yuanmingense_CGMCC_1_3531	Bradyrhizobium_sp_CCBAU_15544	0.9001	0.0999
Bradyrhizobium_yuanmingense_CGMCC_1_3531	Bradyrhizobium_sp_CCBAU_15635	0.8998	0.1002
Bradyrhizobium_yuanmingense_CGMCC_1_3531	Bradyrhizobium_japonicum_USDA_4	0.8997	0.1003
Bradyrhizobium_yuanmingense_CGMCC_1_3531	Bradyrhizobium_sp_CCBAU_15615	0.8998	0.1002
Bradyrhizobium_yuanmingense_CGMCC_1_3531	Bradyrhizobium_sp_ERR11	0.9	0.1
Bradyrhizobium_yuanmingense_CGMCC_1_3531	Bradyrhizobium_sp_Rc3b	0.9003	0.0997
Bradyrhizobium_yuanmingense_CGMCC_1_3531	Bradyrhizobium_sp_WSM2793	0.9001	0.0999
Bradyrhizobium_yuanmingense_CGMCC_1_3531	Bradyrhizobium_japonicum_22	0.9016	0.0984
Bradyrhizobium_yuanmingense_CGMCC_1_3531	Bradyrhizobium_sp_AT1	0.8995	0.1005
Bradyrhizobium_yuanmingense_CGMCC_1_3531	Bradyrhizobium_diazoefficiens_SEMIA_5080	0.8974	0.1026
Bradyrhizobium_yuanmingense_CGMCC_1_3531	Bradyrhizobium_japonicum_USDA_122	0.8974	0.1026
Bradyrhizobium_yuanmingense_CGMCC_1_3531	Bradyrhizobium_japonicum_Is-1	0.8975	0.1025
Bradyrhizobium_yuanmingense_CGMCC_1_3531	Bradyrhizobium_diazoefficiens_NK6	0.8969	0.1031
Bradyrhizobium_yuanmingense_CGMCC_1_3531	Bradyrhizobium_sp_CCBAU_41267	0.8973	0.1027
Bradyrhizobium_yuanmingense_CGMCC_1_3531	Bradyrhizobium_diazoefficiens_USDA_110	0.8972	0.1028
Bradyrhizobium_yuanmingense_CGMCC_1_3531	Bradyrhizobium_sp_WSM2254	0.8964	0.1036
Bradyrhizobium_yuanmingense_CGMCC_1_3531	Bradyrhizobium_sp_CF659	0.8975	0.1025
Bradyrhizobium_yuanmingense_CGMCC_1_3531	Bradyrhizobium_sp_YR681	0.8921	0.1079
Bradyrhizobium_yuanmingense_CGMCC_1_3531	Bradyrhizobium_huanghuaihaiense_CGMCC_1_10948	0.9022	0.0978
Bradyrhizobium_yuanmingense_CGMCC_1_3531	Bradyrhizobium_japonicum_USDA_124	0.9023	0.0977
Bradyrhizobium_yuanmingense_CGMCC_1_3531	Bradyrhizobium_stylosanthis_BR_446	0.8968	0.1032
Bradyrhizobium_yuanmingense_CGMCC_1_3531	Bradyrhizobium_arachidis_LMG_26795	0.8948	0.1052
Bradyrhizobium_yuanmingense_CGMCC_1_3531	Bradyrhizobium_sp_USDA_3384	0.8946	0.1054
Bradyrhizobium_yuanmingense_CGMCC_1_3531	Bradyrhizobium_japonicum_E109	0.8921	0.1079
Bradyrhizobium_yuanmingense_CGMCC_1_3531	Bradyrhizobium_japonicum_FN1	0.8922	0.1078
Bradyrhizobium_yuanmingense_CGMCC_1_3531	Bradyrhizobium_japonicum_USDA_6	0.8921	0.1079
Bradyrhizobium_yuanmingense_CGMCC_1_3531	Bradyrhizobium_japonicum_CCBAU_25435	0.8922	0.1078
Bradyrhizobium_yuanmingense_CGMCC_1_3531	Bradyrhizobium_japonicum_SEMIA_5079	0.8921	0.1079
Bradyrhizobium_yuanmingense_CGMCC_1_3531	Bradyrhizobium_japonicum_CCBAU_15618	0.8926	0.1074
Bradyrhizobium_yuanmingense_CGMCC_1_3531	Bradyrhizobium_japonicum_Is-34	0.892	0.108
Bradyrhizobium_yuanmingense_CGMCC_1_3531	Bradyrhizobium_japonicum_USDA_38	0.892	0.108
Bradyrhizobium_yuanmingense_CGMCC_1_3531	Bradyrhizobium_japonicum_USDA_123	0.8918	0.1082
Bradyrhizobium_yuanmingense_CGMCC_1_3531	Bradyrhizobium_japonicum_CCBAU_15354	0.8921	0.1079
Bradyrhizobium_yuanmingense_CGMCC_1_3531	Bradyrhizobium_japonicum_CCBA_15517	0.892	0.108
Bradyrhizobium_yuanmingense_CGMCC_1_3531	Bradyrhizobium_japonicum_CCBAU_83623	0.8924	0.1076
Bradyrhizobium_yuanmingense_CGMCC_1_3531	Bradyrhizobium_sp_G22	0.8919	0.1081
Bradyrhizobium_yuanmingense_CGMCC_1_3531	Bradyrhizobium_sp_OK095	0.8867	0.1133
Bradyrhizobium_yuanmingense_CGMCC_1_3531	Bradyrhizobium_sp_S23321	0.8881	0.1119
Bradyrhizobium_yuanmingense_CGMCC_1_3531	Bradyrhizobium_sp_BF49	0.8869	0.1131
Bradyrhizobium_yuanmingense_CGMCC_1_3531	Bradyrhizobium_sp_WSM471	0.8873	0.1127
Bradyrhizobium_yuanmingense_CGMCC_1_3531	Bradyrhizobium_sp_WSM1253	0.8878	0.1122
Bradyrhizobium_yuanmingense_CGMCC_1_3531	Bradyrhizobium_sp_URHA0013	0.8873	0.1127
Bradyrhizobium_yuanmingense_CGMCC_1_3531	Bradyrhizobium_sp_WSM1417	0.887	0.113
Bradyrhizobium_yuanmingense_CGMCC_1_3531	Bradyrhizobium_sp_WSM4349	0.8858	0.1142
Bradyrhizobium_yuanmingense_CGMCC_1_3531	Bradyrhizobium_sp_LTSP849	0.8817	0.1183
Bradyrhizobium_yuanmingense_CGMCC_1_3531	Bradyrhizobium_sp_LTSP857	0.8818	0.1182
Bradyrhizobium_yuanmingense_CGMCC_1_3531	Bradyrhizobium_sp_WSM3983	0.8828	0.1172
Bradyrhizobium_yuanmingense_CGMCC_1_3531	Bradyrhizobium_sp_Gha	0.8786	0.1214
Bradyrhizobium_yuanmingense_CGMCC_1_3531	Bradyrhizobium_sp_Cp5_3	0.8817	0.1183
Bradyrhizobium_yuanmingense_CGMCC_1_3531	Bradyrhizobium_neotropicale_BR_10247	0.8819	0.1181
Bradyrhizobium_yuanmingense_CGMCC_1_3531	Bradyrhizobium_manausense_BR3351	0.882	0.118
Bradyrhizobium_yuanmingense_CGMCC_1_3531	Bradyrhizobium_sp_Ghvi	0.8791	0.1209
Bradyrhizobium_yuanmingense_CGMCC_1_3531	Bradyrhizobium_sp_BR_10245	0.8809	0.1191
Bradyrhizobium_yuanmingense_CGMCC_1_3531	Bradyrhizobium_sp_Ec3_3	0.8649	0.1351
Bradyrhizobium_yuanmingense_CGMCC_1_3531	Bradyrhizobium_elkanii_587	0.8383	0.1617
Bradyrhizobium_yuanmingense_CGMCC_1_3531	Bradyrhizobium_elkanii_CCBAU_05737	0.8352	0.1648
Bradyrhizobium_yuanmingense_CGMCC_1_3531	Bradyrhizobium_elkanii_USDA_94	0.8359	0.1641
Bradyrhizobium_yuanmingense_CGMCC_1_3531	Bradyrhizobium_elkanii_BLY6-1	0.836	0.164
Bradyrhizobium_yuanmingense_CGMCC_1_3531	Bradyrhizobium_elkanii_BLY3-8	0.8359	0.1641
Bradyrhizobium_yuanmingense_CGMCC_1_3531	Bradyrhizobium_elkanii_USDA_76	0.8358	0.1642
Bradyrhizobium_yuanmingense_CGMCC_1_3531	Bradyrhizobium_elkanii_CCBAU_43297	0.8365	0.1635
Bradyrhizobium_yuanmingense_CGMCC_1_3531	Bradyrhizobium_elkanii_USDA_3254	0.836	0.164
Bradyrhizobium_yuanmingense_CGMCC_1_3531	Bradyrhizobium_elkanii_USDA_3259	0.8362	0.1638
Bradyrhizobium_yuanmingense_CGMCC_1_3531	Bradyrhizobium_pachyrhizi_PAC_48	0.8356	0.1644
Bradyrhizobium_yuanmingense_CGMCC_1_3531	Bradyrhizobium_sp_R5	0.8346	0.1654
Bradyrhizobium_yuanmingense_CGMCC_1_3531	Bradyrhizobium_pachyrhizi_BR3262	0.835	0.165
Bradyrhizobium_yuanmingense_CGMCC_1_3531	Bradyrhizobium_sp_DFCI-1	0.8355	0.1645
Bradyrhizobium_yuanmingense_CGMCC_1_3531	Bradyrhizobium_sp_17-4	0.8427	0.1573
Bradyrhizobium_yuanmingense_CGMCC_1_3531	Bradyrhizobium_viridifuturi_SEMIA_690	0.8345	0.1655
Bradyrhizobium_yuanmingense_CGMCC_1_3531	Bradyrhizobium_tropiciagri_SEMIA_6148	0.835	0.165
Bradyrhizobium_yuanmingense_CGMCC_1_3531	Bradyrhizobium_erythrophlei_MT12	0.8338	0.1662
Bradyrhizobium_yuanmingense_CGMCC_1_3531	Bradyrhizobium_embrapense_SEMIA_6208	0.834	0.166
Bradyrhizobium_yuanmingense_CGMCC_1_3531	Bradyrhizobium_elkanii_UASWS1015	0.8345	0.1655
Bradyrhizobium_yuanmingense_CGMCC_1_3531	Bradyrhizobium_sp_OHSU_III	0.8346	0.1654
Bradyrhizobium_yuanmingense_CGMCC_1_3531	Bradyrhizobium_sp_th_b2	0.8331	0.1669
Bradyrhizobium_yuanmingense_CGMCC_1_3531	Bradyrhizobium_sp_LTSP885	0.8283	0.1717
Bradyrhizobium_yuanmingense_CGMCC_1_3531	Bradyrhizobium_sp_LTSPM299	0.8276	0.1724
Bradyrhizobium_yuanmingense_CGMCC_1_3531	Bradyrhizobium_sp_BR_10303	0.8302	0.1698
Bradyrhizobium_yuanmingense_CGMCC_1_3531	Bradyrhizobium_sp_Ai1a-2	0.8286	0.1714
Bradyrhizobium_yuanmingense_CGMCC_1_3531	Bradyrhizobium_elkanii_WSM2783	0.8282	0.1718
Bradyrhizobium_yuanmingense_CGMCC_1_3531	Bradyrhizobium_sp_ORS_278	0.8236	0.1764
Bradyrhizobium_yuanmingense_CGMCC_1_3531	Bradyrhizobium_sp_ORS_375	0.8241	0.1759
Bradyrhizobium_yuanmingense_CGMCC_1_3531	Bradyrhizobium_sp_STM_3809	0.8261	0.1739
Bradyrhizobium_yuanmingense_CGMCC_1_3531	Bradyrhizobium_sp_BTAi1	0.8207	0.1793
Bradyrhizobium_yuanmingense_CGMCC_1_3531	Bradyrhizobium_oligotrophicum_S58	0.8232	0.1768
Bradyrhizobium_yuanmingense_CGMCC_1_3531	Bradyrhizobium_sp_ORS_285	0.8229	0.1771
Bradyrhizobium_yuanmingense_CGMCC_1_3531	Bradyrhizobium_sp_STM_3843	0.8184	0.1816
Bradyrhizobium_yuanmingense_CGMCC_1_3531	Bradyrhizobium_sp_Tv2a-2	0.8196	0.1804
Bradyrhizobium_yuanmingense_CGMCC_1_3531	Bradyrhizobium_sp_ARR65	0.8162	0.1838
Bradyrhizobium_yuanmingense_CGMCC_1_3531	Bradyrhizobium_elkanii_WSM1741	0.8223	0.1777
Bradyrhizobium_yuanmingense_CGMCC_1_3531	Bradyrhizobium_retamae_Ro19	0.8227	0.1773
Bradyrhizobium_yuanmingense_CGMCC_1_3531	Bradyrhizobium_sp_LMTR_3	0.8225	0.1775
Bradyrhizobium_yuanmingense_CGMCC_1_3531	Bradyrhizobium_icense_LMTR_13	0.8227	0.1773
Bradyrhizobium_yuanmingense_CGMCC_1_3531	Bradyrhizobium_valentinum_LmjM3	0.8225	0.1775
Bradyrhizobium_yuanmingense_CGMCC_1_3531	Bradyrhizobium_valentinum_LmjM6	0.822	0.178
Bradyrhizobium_yuanmingense_CGMCC_1_3531	Bradyrhizobium_jicamae_PAC68	0.824	0.176
Bradyrhizobium_yuanmingense_CGMCC_1_3531	Bradyrhizobium_paxllaeri_LMTR_21	0.8243	0.1757
Bradyrhizobium_yuanmingense_CGMCC_1_3531	Bradyrhizobium_lablabi_GAS522	0.8266	0.1734
Bradyrhizobium_yuanmingense_CGMCC_1_3531	Bradyrhizobium_ottawaense_GAS524	0.8265	0.1735
Bradyrhizobium_yuanmingense_CGMCC_1_3531	Bradyrhizobium_sp_URHA0002	0.8236	0.1764
Bradyrhizobium_yuanmingense_CGMCC_1_3531	Bradyrhizobium_erythrophlei_GAS138	0.8165	0.1835
Bradyrhizobium_yuanmingense_CGMCC_1_3531	Bradyrhizobium_sp_URHD0069	0.8136	0.1864
Bradyrhizobium_yuanmingense_CGMCC_1_3531	Bradyrhizobium_canariense_GAS369	0.8138	0.1862
Bradyrhizobium_yuanmingense_CGMCC_1_3531	Bradyrhizobium_erythrophlei_GAS242	0.8237	0.1763
Bradyrhizobium_yuanmingense_CGMCC_1_3531	Bradyrhizobium_erythrophlei_GAS401	0.8125	0.1875
Bradyrhizobium_yuanmingense_CGMCC_1_3531	Bradyrhizobium_sp_CCH4-A6	0.7955	0.2045
Bradyrhizobium_yuanmingense_CGMCC_1_3531	Bradyrhizobium_sp_CCH10-C7	0.796	0.204
Bradyrhizobium_yuanmingense_CGMCC_1_3531	Rhizobium_lupini_HPC_L	0.754	0.246
Bradyrhizobium_yuanmingense_CGMCC_1_3531	Mesorhizobium_ciceri_WSM1271	0.77	0.23
Bradyrhizobium_yuanmingense_CCBAU_35157	Bradyrhizobium_yuanmingense_CCBAU_05623	0.9726	0.0274
Bradyrhizobium_yuanmingense_CCBAU_35157	Bradyrhizobium_yuanmingense_BR3267	0.981	0.019
Bradyrhizobium_yuanmingense_CCBAU_35157	Bradyrhizobium_sp_DOA9	0.9287	0.0713
Bradyrhizobium_yuanmingense_CCBAU_35157	Bradyrhizobium_sp_WSM1743	0.9051	0.0949
Bradyrhizobium_yuanmingense_CCBAU_35157	Bradyrhizobium_japonicum_in8p8	0.8944	0.1056
Bradyrhizobium_yuanmingense_CCBAU_35157	Bradyrhizobium_japonicum_is5	0.8949	0.1051
Bradyrhizobium_yuanmingense_CCBAU_35157	Bradyrhizobium_sp_Leaf396	0.8922	0.1078
Bradyrhizobium_yuanmingense_CCBAU_35157	Bradyrhizobium_japonicum_USDA_135	0.9064	0.0936
Bradyrhizobium_yuanmingense_CCBAU_35157	Bradyrhizobium_liaoningense_CCBAU_05525	0.8919	0.1081
Bradyrhizobium_yuanmingense_CCBAU_35157	Bradyrhizobium_liaoningense_CCBAU_83689	0.9134	0.0866
Bradyrhizobium_yuanmingense_CCBAU_35157	Bradyrhizobium_liaoningense_CCNWSX0360	0.9032	0.0968
Bradyrhizobium_yuanmingense_CCBAU_35157	Bradyrhizobium_sp_CCBAU_43298	0.8757	0.1243
Bradyrhizobium_yuanmingense_CCBAU_35157	Bradyrhizobium_sp_CCH5-F6	0.8997	0.1003
Bradyrhizobium_yuanmingense_CCBAU_35157	Bradyrhizobium_sp_CCGE-LA001	0.8907	0.1093
Bradyrhizobium_yuanmingense_CCBAU_35157	Bradyrhizobium_sp_DOA1	0.8923	0.1077
Bradyrhizobium_yuanmingense_CCBAU_35157	Bradyrhizobium_daqingense_CGMCC_1_10947	0.8923	0.1077
Bradyrhizobium_yuanmingense_CCBAU_35157	Bradyrhizobium_sp_Rc2d	0.8866	0.1134
Bradyrhizobium_yuanmingense_CCBAU_35157	Bradyrhizobium_sp_CCBAU_15544	0.8898	0.1102
Bradyrhizobium_yuanmingense_CCBAU_35157	Bradyrhizobium_sp_CCBAU_15635	0.8928	0.1072
Bradyrhizobium_yuanmingense_CCBAU_35157	Bradyrhizobium_japonicum_USDA_4	0.8987	0.1013
Bradyrhizobium_yuanmingense_CCBAU_35157	Bradyrhizobium_sp_CCBAU_15615	0.8985	0.1015
Bradyrhizobium_yuanmingense_CCBAU_35157	Bradyrhizobium_sp_ERR11	0.8882	0.1118
Bradyrhizobium_yuanmingense_CCBAU_35157	Bradyrhizobium_sp_Rc3b	0.892	0.108
Bradyrhizobium_yuanmingense_CCBAU_35157	Bradyrhizobium_sp_WSM2793	0.8897	0.1103
Bradyrhizobium_yuanmingense_CCBAU_35157	Bradyrhizobium_japonicum_22	0.8877	0.1123
Bradyrhizobium_yuanmingense_CCBAU_35157	Bradyrhizobium_sp_AT1	0.8855	0.1145
Bradyrhizobium_yuanmingense_CCBAU_35157	Bradyrhizobium_diazoefficiens_SEMIA_5080	0.8863	0.1137
Bradyrhizobium_yuanmingense_CCBAU_35157	Bradyrhizobium_japonicum_USDA_122	0.8863	0.1137
Bradyrhizobium_yuanmingense_CCBAU_35157	Bradyrhizobium_japonicum_Is-1	0.8863	0.1137
Bradyrhizobium_yuanmingense_CCBAU_35157	Bradyrhizobium_diazoefficiens_NK6	0.8849	0.1151
Bradyrhizobium_yuanmingense_CCBAU_35157	Bradyrhizobium_sp_CCBAU_41267	0.8866	0.1134
Bradyrhizobium_yuanmingense_CCBAU_35157	Bradyrhizobium_diazoefficiens_USDA_110	0.8869	0.1131
Bradyrhizobium_yuanmingense_CCBAU_35157	Bradyrhizobium_sp_WSM2254	0.882	0.118
Bradyrhizobium_yuanmingense_CCBAU_35157	Bradyrhizobium_sp_CF659	0.88	0.12
Bradyrhizobium_yuanmingense_CCBAU_35157	Bradyrhizobium_sp_YR681	0.8778	0.1222
Bradyrhizobium_yuanmingense_CCBAU_35157	Bradyrhizobium_huanghuaihaiense_CGMCC_1_10948	0.8869	0.1131
Bradyrhizobium_yuanmingense_CCBAU_35157	Bradyrhizobium_japonicum_USDA_124	0.8867	0.1133
Bradyrhizobium_yuanmingense_CCBAU_35157	Bradyrhizobium_stylosanthis_BR_446	0.8884	0.1116
Bradyrhizobium_yuanmingense_CCBAU_35157	Bradyrhizobium_arachidis_LMG_26795	0.8857	0.1143
Bradyrhizobium_yuanmingense_CCBAU_35157	Bradyrhizobium_sp_USDA_3384	0.8854	0.1146
Bradyrhizobium_yuanmingense_CCBAU_35157	Bradyrhizobium_japonicum_E109	0.8806	0.1194
Bradyrhizobium_yuanmingense_CCBAU_35157	Bradyrhizobium_japonicum_FN1	0.8805	0.1195
Bradyrhizobium_yuanmingense_CCBAU_35157	Bradyrhizobium_japonicum_USDA_6	0.8806	0.1194
Bradyrhizobium_yuanmingense_CCBAU_35157	Bradyrhizobium_japonicum_CCBAU_25435	0.8785	0.1215
Bradyrhizobium_yuanmingense_CCBAU_35157	Bradyrhizobium_japonicum_SEMIA_5079	0.882	0.118
Bradyrhizobium_yuanmingense_CCBAU_35157	Bradyrhizobium_japonicum_CCBAU_15618	0.8801	0.1199
Bradyrhizobium_yuanmingense_CCBAU_35157	Bradyrhizobium_japonicum_Is-34	0.8843	0.1157
Bradyrhizobium_yuanmingense_CCBAU_35157	Bradyrhizobium_japonicum_USDA_38	0.8827	0.1173
Bradyrhizobium_yuanmingense_CCBAU_35157	Bradyrhizobium_japonicum_USDA_123	0.8817	0.1183
Bradyrhizobium_yuanmingense_CCBAU_35157	Bradyrhizobium_japonicum_CCBAU_15354	0.8841	0.1159
Bradyrhizobium_yuanmingense_CCBAU_35157	Bradyrhizobium_japonicum_CCBA_15517	0.8826	0.1174
Bradyrhizobium_yuanmingense_CCBAU_35157	Bradyrhizobium_japonicum_CCBAU_83623	0.8831	0.1169
Bradyrhizobium_yuanmingense_CCBAU_35157	Bradyrhizobium_sp_G22	0.8817	0.1183
Bradyrhizobium_yuanmingense_CCBAU_35157	Bradyrhizobium_sp_OK095	0.8765	0.1235
Bradyrhizobium_yuanmingense_CCBAU_35157	Bradyrhizobium_sp_S23321	0.8766	0.1234
Bradyrhizobium_yuanmingense_CCBAU_35157	Bradyrhizobium_sp_BF49	0.8718	0.1282
Bradyrhizobium_yuanmingense_CCBAU_35157	Bradyrhizobium_sp_WSM471	0.8752	0.1248
Bradyrhizobium_yuanmingense_CCBAU_35157	Bradyrhizobium_sp_WSM1253	0.8746	0.1254
Bradyrhizobium_yuanmingense_CCBAU_35157	Bradyrhizobium_sp_URHA0013	0.8769	0.1231
Bradyrhizobium_yuanmingense_CCBAU_35157	Bradyrhizobium_sp_WSM1417	0.8763	0.1237
Bradyrhizobium_yuanmingense_CCBAU_35157	Bradyrhizobium_sp_WSM4349	0.8731	0.1269
Bradyrhizobium_yuanmingense_CCBAU_35157	Bradyrhizobium_sp_LTSP849	0.8675	0.1325
Bradyrhizobium_yuanmingense_CCBAU_35157	Bradyrhizobium_sp_LTSP857	0.8666	0.1334
Bradyrhizobium_yuanmingense_CCBAU_35157	Bradyrhizobium_sp_WSM3983	0.8658	0.1342
Bradyrhizobium_yuanmingense_CCBAU_35157	Bradyrhizobium_sp_Gha	0.8681	0.1319
Bradyrhizobium_yuanmingense_CCBAU_35157	Bradyrhizobium_sp_Cp5_3	0.8749	0.1251
Bradyrhizobium_yuanmingense_CCBAU_35157	Bradyrhizobium_neotropicale_BR_10247	0.8746	0.1254
Bradyrhizobium_yuanmingense_CCBAU_35157	Bradyrhizobium_manausense_BR3351	0.8684	0.1316
Bradyrhizobium_yuanmingense_CCBAU_35157	Bradyrhizobium_sp_Ghvi	0.8641	0.1359
Bradyrhizobium_yuanmingense_CCBAU_35157	Bradyrhizobium_sp_BR_10245	0.872	0.128
Bradyrhizobium_yuanmingense_CCBAU_35157	Bradyrhizobium_sp_Ec3_3	0.8576	0.1424
Bradyrhizobium_yuanmingense_CCBAU_35157	Bradyrhizobium_elkanii_587	0.8175	0.1825
Bradyrhizobium_yuanmingense_CCBAU_35157	Bradyrhizobium_elkanii_CCBAU_05737	0.8227	0.1773
Bradyrhizobium_yuanmingense_CCBAU_35157	Bradyrhizobium_elkanii_USDA_94	0.8185	0.1815
Bradyrhizobium_yuanmingense_CCBAU_35157	Bradyrhizobium_elkanii_BLY6-1	0.8199	0.1801
Bradyrhizobium_yuanmingense_CCBAU_35157	Bradyrhizobium_elkanii_BLY3-8	0.8199	0.1801
Bradyrhizobium_yuanmingense_CCBAU_35157	Bradyrhizobium_elkanii_USDA_76	0.8197	0.1803
Bradyrhizobium_yuanmingense_CCBAU_35157	Bradyrhizobium_elkanii_CCBAU_43297	0.8208	0.1792
Bradyrhizobium_yuanmingense_CCBAU_35157	Bradyrhizobium_elkanii_USDA_3254	0.8226	0.1774
Bradyrhizobium_yuanmingense_CCBAU_35157	Bradyrhizobium_elkanii_USDA_3259	0.8226	0.1774
Bradyrhizobium_yuanmingense_CCBAU_35157	Bradyrhizobium_pachyrhizi_PAC_48	0.8206	0.1794
Bradyrhizobium_yuanmingense_CCBAU_35157	Bradyrhizobium_sp_R5	0.8237	0.1763
Bradyrhizobium_yuanmingense_CCBAU_35157	Bradyrhizobium_pachyrhizi_BR3262	0.8228	0.1772
Bradyrhizobium_yuanmingense_CCBAU_35157	Bradyrhizobium_sp_DFCI-1	0.8225	0.1775
Bradyrhizobium_yuanmingense_CCBAU_35157	Bradyrhizobium_sp_17-4	0.8304	0.1696
Bradyrhizobium_yuanmingense_CCBAU_35157	Bradyrhizobium_viridifuturi_SEMIA_690	0.8217	0.1783
Bradyrhizobium_yuanmingense_CCBAU_35157	Bradyrhizobium_tropiciagri_SEMIA_6148	0.8217	0.1783
Bradyrhizobium_yuanmingense_CCBAU_35157	Bradyrhizobium_erythrophlei_MT12	0.823	0.177
Bradyrhizobium_yuanmingense_CCBAU_35157	Bradyrhizobium_embrapense_SEMIA_6208	0.8146	0.1854
Bradyrhizobium_yuanmingense_CCBAU_35157	Bradyrhizobium_elkanii_UASWS1015	0.8201	0.1799
Bradyrhizobium_yuanmingense_CCBAU_35157	Bradyrhizobium_sp_OHSU_III	0.8187	0.1813
Bradyrhizobium_yuanmingense_CCBAU_35157	Bradyrhizobium_sp_th_b2	0.8169	0.1831
Bradyrhizobium_yuanmingense_CCBAU_35157	Bradyrhizobium_sp_LTSP885	0.8101	0.1899
Bradyrhizobium_yuanmingense_CCBAU_35157	Bradyrhizobium_sp_LTSPM299	0.808	0.192
Bradyrhizobium_yuanmingense_CCBAU_35157	Bradyrhizobium_sp_BR_10303	0.8172	0.1828
Bradyrhizobium_yuanmingense_CCBAU_35157	Bradyrhizobium_sp_Ai1a-2	0.8138	0.1862
Bradyrhizobium_yuanmingense_CCBAU_35157	Bradyrhizobium_elkanii_WSM2783	0.816	0.184
Bradyrhizobium_yuanmingense_CCBAU_35157	Bradyrhizobium_sp_ORS_278	0.8097	0.1903
Bradyrhizobium_yuanmingense_CCBAU_35157	Bradyrhizobium_sp_ORS_375	0.8118	0.1882
Bradyrhizobium_yuanmingense_CCBAU_35157	Bradyrhizobium_sp_STM_3809	0.8147	0.1853
Bradyrhizobium_yuanmingense_CCBAU_35157	Bradyrhizobium_sp_BTAi1	0.8109	0.1891
Bradyrhizobium_yuanmingense_CCBAU_35157	Bradyrhizobium_oligotrophicum_S58	0.8098	0.1902
Bradyrhizobium_yuanmingense_CCBAU_35157	Bradyrhizobium_sp_ORS_285	0.8094	0.1906
Bradyrhizobium_yuanmingense_CCBAU_35157	Bradyrhizobium_sp_STM_3843	0.8114	0.1886
Bradyrhizobium_yuanmingense_CCBAU_35157	Bradyrhizobium_sp_Tv2a-2	0.8078	0.1922
Bradyrhizobium_yuanmingense_CCBAU_35157	Bradyrhizobium_sp_ARR65	0.8083	0.1917
Bradyrhizobium_yuanmingense_CCBAU_35157	Bradyrhizobium_elkanii_WSM1741	0.8084	0.1916
Bradyrhizobium_yuanmingense_CCBAU_35157	Bradyrhizobium_retamae_Ro19	0.808	0.192
Bradyrhizobium_yuanmingense_CCBAU_35157	Bradyrhizobium_sp_LMTR_3	0.8066	0.1934
Bradyrhizobium_yuanmingense_CCBAU_35157	Bradyrhizobium_icense_LMTR_13	0.8087	0.1913
Bradyrhizobium_yuanmingense_CCBAU_35157	Bradyrhizobium_valentinum_LmjM3	0.8048	0.1952
Bradyrhizobium_yuanmingense_CCBAU_35157	Bradyrhizobium_valentinum_LmjM6	0.804	0.196
Bradyrhizobium_yuanmingense_CCBAU_35157	Bradyrhizobium_jicamae_PAC68	0.8072	0.1928
Bradyrhizobium_yuanmingense_CCBAU_35157	Bradyrhizobium_paxllaeri_LMTR_21	0.8052	0.1948
Bradyrhizobium_yuanmingense_CCBAU_35157	Bradyrhizobium_lablabi_GAS522	0.8132	0.1868
Bradyrhizobium_yuanmingense_CCBAU_35157	Bradyrhizobium_ottawaense_GAS524	0.8132	0.1868
Bradyrhizobium_yuanmingense_CCBAU_35157	Bradyrhizobium_sp_URHA0002	0.8054	0.1946
Bradyrhizobium_yuanmingense_CCBAU_35157	Bradyrhizobium_erythrophlei_GAS138	0.8001	0.1999
Bradyrhizobium_yuanmingense_CCBAU_35157	Bradyrhizobium_sp_URHD0069	0.7943	0.2057
Bradyrhizobium_yuanmingense_CCBAU_35157	Bradyrhizobium_canariense_GAS369	0.8036	0.1964
Bradyrhizobium_yuanmingense_CCBAU_35157	Bradyrhizobium_erythrophlei_GAS242	0.8083	0.1917
Bradyrhizobium_yuanmingense_CCBAU_35157	Bradyrhizobium_erythrophlei_GAS401	0.7939	0.2061
Bradyrhizobium_yuanmingense_CCBAU_35157	Bradyrhizobium_sp_CCH4-A6	0.7761	0.2239
Bradyrhizobium_yuanmingense_CCBAU_35157	Bradyrhizobium_sp_CCH10-C7	0.7755	0.2245
Bradyrhizobium_yuanmingense_CCBAU_35157	Rhizobium_lupini_HPC_L	0.7222	0.2778
Bradyrhizobium_yuanmingense_CCBAU_35157	Mesorhizobium_ciceri_WSM1271	0.7338	0.2662
Bradyrhizobium_yuanmingense_CCBAU_05623	Bradyrhizobium_yuanmingense_BR3267	0.9711	0.0289
Bradyrhizobium_yuanmingense_CCBAU_05623	Bradyrhizobium_sp_DOA9	0.9307	0.0693
Bradyrhizobium_yuanmingense_CCBAU_05623	Bradyrhizobium_sp_WSM1743	0.8937	0.1063
Bradyrhizobium_yuanmingense_CCBAU_05623	Bradyrhizobium_japonicum_in8p8	0.8942	0.1058
Bradyrhizobium_yuanmingense_CCBAU_05623	Bradyrhizobium_japonicum_is5	0.8938	0.1062
Bradyrhizobium_yuanmingense_CCBAU_05623	Bradyrhizobium_sp_Leaf396	0.8918	0.1082
Bradyrhizobium_yuanmingense_CCBAU_05623	Bradyrhizobium_japonicum_USDA_135	0.906	0.094
Bradyrhizobium_yuanmingense_CCBAU_05623	Bradyrhizobium_liaoningense_CCBAU_05525	0.8891	0.1109
Bradyrhizobium_yuanmingense_CCBAU_05623	Bradyrhizobium_liaoningense_CCBAU_83689	0.9112	0.0888
Bradyrhizobium_yuanmingense_CCBAU_05623	Bradyrhizobium_liaoningense_CCNWSX0360	0.9009	0.0991
Bradyrhizobium_yuanmingense_CCBAU_05623	Bradyrhizobium_sp_CCBAU_43298	0.8788	0.1212
Bradyrhizobium_yuanmingense_CCBAU_05623	Bradyrhizobium_sp_CCH5-F6	0.8984	0.1016
Bradyrhizobium_yuanmingense_CCBAU_05623	Bradyrhizobium_sp_CCGE-LA001	0.8815	0.1185
Bradyrhizobium_yuanmingense_CCBAU_05623	Bradyrhizobium_sp_DOA1	0.8775	0.1225
Bradyrhizobium_yuanmingense_CCBAU_05623	Bradyrhizobium_daqingense_CGMCC_1_10947	0.8823	0.1177
Bradyrhizobium_yuanmingense_CCBAU_05623	Bradyrhizobium_sp_Rc2d	0.8889	0.1111
Bradyrhizobium_yuanmingense_CCBAU_05623	Bradyrhizobium_sp_CCBAU_15544	0.8777	0.1223
Bradyrhizobium_yuanmingense_CCBAU_05623	Bradyrhizobium_sp_CCBAU_15635	0.8809	0.1191
Bradyrhizobium_yuanmingense_CCBAU_05623	Bradyrhizobium_japonicum_USDA_4	0.8808	0.1192
Bradyrhizobium_yuanmingense_CCBAU_05623	Bradyrhizobium_sp_CCBAU_15615	0.8808	0.1192
Bradyrhizobium_yuanmingense_CCBAU_05623	Bradyrhizobium_sp_ERR11	0.8771	0.1229
Bradyrhizobium_yuanmingense_CCBAU_05623	Bradyrhizobium_sp_Rc3b	0.8893	0.1107
Bradyrhizobium_yuanmingense_CCBAU_05623	Bradyrhizobium_sp_WSM2793	0.8904	0.1096
Bradyrhizobium_yuanmingense_CCBAU_05623	Bradyrhizobium_japonicum_22	0.8946	0.1054
Bradyrhizobium_yuanmingense_CCBAU_05623	Bradyrhizobium_sp_AT1	0.8941	0.1059
Bradyrhizobium_yuanmingense_CCBAU_05623	Bradyrhizobium_diazoefficiens_SEMIA_5080	0.8775	0.1225
Bradyrhizobium_yuanmingense_CCBAU_05623	Bradyrhizobium_japonicum_USDA_122	0.8775	0.1225
Bradyrhizobium_yuanmingense_CCBAU_05623	Bradyrhizobium_japonicum_Is-1	0.8775	0.1225
Bradyrhizobium_yuanmingense_CCBAU_05623	Bradyrhizobium_diazoefficiens_NK6	0.8899	0.1101
Bradyrhizobium_yuanmingense_CCBAU_05623	Bradyrhizobium_sp_CCBAU_41267	0.8778	0.1222
Bradyrhizobium_yuanmingense_CCBAU_05623	Bradyrhizobium_diazoefficiens_USDA_110	0.8777	0.1223
Bradyrhizobium_yuanmingense_CCBAU_05623	Bradyrhizobium_sp_WSM2254	0.8931	0.1069
Bradyrhizobium_yuanmingense_CCBAU_05623	Bradyrhizobium_sp_CF659	0.8895	0.1105
Bradyrhizobium_yuanmingense_CCBAU_05623	Bradyrhizobium_sp_YR681	0.8861	0.1139
Bradyrhizobium_yuanmingense_CCBAU_05623	Bradyrhizobium_huanghuaihaiense_CGMCC_1_10948	0.8808	0.1192
Bradyrhizobium_yuanmingense_CCBAU_05623	Bradyrhizobium_japonicum_USDA_124	0.8809	0.1191
Bradyrhizobium_yuanmingense_CCBAU_05623	Bradyrhizobium_stylosanthis_BR_446	0.8843	0.1157
Bradyrhizobium_yuanmingense_CCBAU_05623	Bradyrhizobium_arachidis_LMG_26795	0.8851	0.1149
Bradyrhizobium_yuanmingense_CCBAU_05623	Bradyrhizobium_sp_USDA_3384	0.8728	0.1272
Bradyrhizobium_yuanmingense_CCBAU_05623	Bradyrhizobium_japonicum_E109	0.8725	0.1275
Bradyrhizobium_yuanmingense_CCBAU_05623	Bradyrhizobium_japonicum_FN1	0.8725	0.1275
Bradyrhizobium_yuanmingense_CCBAU_05623	Bradyrhizobium_japonicum_USDA_6	0.8725	0.1275
Bradyrhizobium_yuanmingense_CCBAU_05623	Bradyrhizobium_japonicum_CCBAU_25435	0.8701	0.1299
Bradyrhizobium_yuanmingense_CCBAU_05623	Bradyrhizobium_japonicum_SEMIA_5079	0.8714	0.1286
Bradyrhizobium_yuanmingense_CCBAU_05623	Bradyrhizobium_japonicum_CCBAU_15618	0.8701	0.1299
Bradyrhizobium_yuanmingense_CCBAU_05623	Bradyrhizobium_japonicum_Is-34	0.8716	0.1284
Bradyrhizobium_yuanmingense_CCBAU_05623	Bradyrhizobium_japonicum_USDA_38	0.8712	0.1288
Bradyrhizobium_yuanmingense_CCBAU_05623	Bradyrhizobium_japonicum_USDA_123	0.872	0.128
Bradyrhizobium_yuanmingense_CCBAU_05623	Bradyrhizobium_japonicum_CCBAU_15354	0.8713	0.1287
Bradyrhizobium_yuanmingense_CCBAU_05623	Bradyrhizobium_japonicum_CCBA_15517	0.8717	0.1283
Bradyrhizobium_yuanmingense_CCBAU_05623	Bradyrhizobium_japonicum_CCBAU_83623	0.8713	0.1287
Bradyrhizobium_yuanmingense_CCBAU_05623	Bradyrhizobium_sp_G22	0.8827	0.1173
Bradyrhizobium_yuanmingense_CCBAU_05623	Bradyrhizobium_sp_OK095	0.8765	0.1235
Bradyrhizobium_yuanmingense_CCBAU_05623	Bradyrhizobium_sp_S23321	0.8787	0.1213
Bradyrhizobium_yuanmingense_CCBAU_05623	Bradyrhizobium_sp_BF49	0.8742	0.1258
Bradyrhizobium_yuanmingense_CCBAU_05623	Bradyrhizobium_sp_WSM471	0.87	0.13
Bradyrhizobium_yuanmingense_CCBAU_05623	Bradyrhizobium_sp_WSM1253	0.8695	0.1305
Bradyrhizobium_yuanmingense_CCBAU_05623	Bradyrhizobium_sp_URHA0013	0.8759	0.1241
Bradyrhizobium_yuanmingense_CCBAU_05623	Bradyrhizobium_sp_WSM1417	0.8772	0.1228
Bradyrhizobium_yuanmingense_CCBAU_05623	Bradyrhizobium_sp_WSM4349	0.8663	0.1337
Bradyrhizobium_yuanmingense_CCBAU_05623	Bradyrhizobium_sp_LTSP849	0.8843	0.1157
Bradyrhizobium_yuanmingense_CCBAU_05623	Bradyrhizobium_sp_LTSP857	0.8843	0.1157
Bradyrhizobium_yuanmingense_CCBAU_05623	Bradyrhizobium_sp_WSM3983	0.8752	0.1248
Bradyrhizobium_yuanmingense_CCBAU_05623	Bradyrhizobium_sp_Gha	0.8607	0.1393
Bradyrhizobium_yuanmingense_CCBAU_05623	Bradyrhizobium_sp_Cp5_3	0.8631	0.1369
Bradyrhizobium_yuanmingense_CCBAU_05623	Bradyrhizobium_neotropicale_BR_10247	0.8679	0.1321
Bradyrhizobium_yuanmingense_CCBAU_05623	Bradyrhizobium_manausense_BR3351	0.864	0.136
Bradyrhizobium_yuanmingense_CCBAU_05623	Bradyrhizobium_sp_Ghvi	0.8659	0.1341
Bradyrhizobium_yuanmingense_CCBAU_05623	Bradyrhizobium_sp_BR_10245	0.876	0.124
Bradyrhizobium_yuanmingense_CCBAU_05623	Bradyrhizobium_sp_Ec3_3	0.8627	0.1373
Bradyrhizobium_yuanmingense_CCBAU_05623	Bradyrhizobium_elkanii_587	0.8103	0.1897
Bradyrhizobium_yuanmingense_CCBAU_05623	Bradyrhizobium_elkanii_CCBAU_05737	0.8077	0.1923
Bradyrhizobium_yuanmingense_CCBAU_05623	Bradyrhizobium_elkanii_USDA_94	0.8016	0.1984
Bradyrhizobium_yuanmingense_CCBAU_05623	Bradyrhizobium_elkanii_BLY6-1	0.8096	0.1904
Bradyrhizobium_yuanmingense_CCBAU_05623	Bradyrhizobium_elkanii_BLY3-8	0.8096	0.1904
Bradyrhizobium_yuanmingense_CCBAU_05623	Bradyrhizobium_elkanii_USDA_76	0.808	0.192
Bradyrhizobium_yuanmingense_CCBAU_05623	Bradyrhizobium_elkanii_CCBAU_43297	0.8092	0.1908
Bradyrhizobium_yuanmingense_CCBAU_05623	Bradyrhizobium_elkanii_USDA_3254	0.8069	0.1931
Bradyrhizobium_yuanmingense_CCBAU_05623	Bradyrhizobium_elkanii_USDA_3259	0.8069	0.1931
Bradyrhizobium_yuanmingense_CCBAU_05623	Bradyrhizobium_pachyrhizi_PAC_48	0.8101	0.1899
Bradyrhizobium_yuanmingense_CCBAU_05623	Bradyrhizobium_sp_R5	0.7996	0.2004
Bradyrhizobium_yuanmingense_CCBAU_05623	Bradyrhizobium_pachyrhizi_BR3262	0.8011	0.1989
Bradyrhizobium_yuanmingense_CCBAU_05623	Bradyrhizobium_sp_DFCI-1	0.8108	0.1892
Bradyrhizobium_yuanmingense_CCBAU_05623	Bradyrhizobium_sp_17-4	0.8098	0.1902
Bradyrhizobium_yuanmingense_CCBAU_05623	Bradyrhizobium_viridifuturi_SEMIA_690	0.8083	0.1917
Bradyrhizobium_yuanmingense_CCBAU_05623	Bradyrhizobium_tropiciagri_SEMIA_6148	0.7989	0.2011
Bradyrhizobium_yuanmingense_CCBAU_05623	Bradyrhizobium_erythrophlei_MT12	0.8097	0.1903
Bradyrhizobium_yuanmingense_CCBAU_05623	Bradyrhizobium_embrapense_SEMIA_6208	0.8074	0.1926
Bradyrhizobium_yuanmingense_CCBAU_05623	Bradyrhizobium_elkanii_UASWS1015	0.8051	0.1949
Bradyrhizobium_yuanmingense_CCBAU_05623	Bradyrhizobium_sp_OHSU_III	0.8053	0.1947
Bradyrhizobium_yuanmingense_CCBAU_05623	Bradyrhizobium_sp_th_b2	0.8087	0.1913
Bradyrhizobium_yuanmingense_CCBAU_05623	Bradyrhizobium_sp_LTSP885	0.8056	0.1944
Bradyrhizobium_yuanmingense_CCBAU_05623	Bradyrhizobium_sp_LTSPM299	0.8044	0.1956
Bradyrhizobium_yuanmingense_CCBAU_05623	Bradyrhizobium_sp_BR_10303	0.8075	0.1925
Bradyrhizobium_yuanmingense_CCBAU_05623	Bradyrhizobium_sp_Ai1a-2	0.7987	0.2013
Bradyrhizobium_yuanmingense_CCBAU_05623	Bradyrhizobium_elkanii_WSM2783	0.8052	0.1948
Bradyrhizobium_yuanmingense_CCBAU_05623	Bradyrhizobium_sp_ORS_278	0.8109	0.1891
Bradyrhizobium_yuanmingense_CCBAU_05623	Bradyrhizobium_sp_ORS_375	0.7754	0.2246
Bradyrhizobium_yuanmingense_CCBAU_05623	Bradyrhizobium_sp_STM_3809	0.8108	0.1892
Bradyrhizobium_yuanmingense_CCBAU_05623	Bradyrhizobium_sp_BTAi1	0.7707	0.2293
Bradyrhizobium_yuanmingense_CCBAU_05623	Bradyrhizobium_oligotrophicum_S58	0.7734	0.2266
Bradyrhizobium_yuanmingense_CCBAU_05623	Bradyrhizobium_sp_ORS_285	0.7735	0.2265
Bradyrhizobium_yuanmingense_CCBAU_05623	Bradyrhizobium_sp_STM_3843	0.8315	0.1685
Bradyrhizobium_yuanmingense_CCBAU_05623	Bradyrhizobium_sp_Tv2a-2	0.8078	0.1922
Bradyrhizobium_yuanmingense_CCBAU_05623	Bradyrhizobium_sp_ARR65	0.8029	0.1971
Bradyrhizobium_yuanmingense_CCBAU_05623	Bradyrhizobium_elkanii_WSM1741	0.8042	0.1958
Bradyrhizobium_yuanmingense_CCBAU_05623	Bradyrhizobium_retamae_Ro19	0.8052	0.1948
Bradyrhizobium_yuanmingense_CCBAU_05623	Bradyrhizobium_sp_LMTR_3	0.8048	0.1952
Bradyrhizobium_yuanmingense_CCBAU_05623	Bradyrhizobium_icense_LMTR_13	0.8032	0.1968
Bradyrhizobium_yuanmingense_CCBAU_05623	Bradyrhizobium_valentinum_LmjM3	0.8063	0.1937
Bradyrhizobium_yuanmingense_CCBAU_05623	Bradyrhizobium_valentinum_LmjM6	0.8076	0.1924
Bradyrhizobium_yuanmingense_CCBAU_05623	Bradyrhizobium_jicamae_PAC68	0.8111	0.1889
Bradyrhizobium_yuanmingense_CCBAU_05623	Bradyrhizobium_paxllaeri_LMTR_21	0.8123	0.1877
Bradyrhizobium_yuanmingense_CCBAU_05623	Bradyrhizobium_lablabi_GAS522	0.8091	0.1909
Bradyrhizobium_yuanmingense_CCBAU_05623	Bradyrhizobium_ottawaense_GAS524	0.8091	0.1909
Bradyrhizobium_yuanmingense_CCBAU_05623	Bradyrhizobium_sp_URHA0002	0.8091	0.1909
Bradyrhizobium_yuanmingense_CCBAU_05623	Bradyrhizobium_erythrophlei_GAS138	0.8075	0.1925
Bradyrhizobium_yuanmingense_CCBAU_05623	Bradyrhizobium_sp_URHD0069	0.7885	0.2115
Bradyrhizobium_yuanmingense_CCBAU_05623	Bradyrhizobium_canariense_GAS369	0.7972	0.2028
Bradyrhizobium_yuanmingense_CCBAU_05623	Bradyrhizobium_erythrophlei_GAS242	0.8081	0.1919
Bradyrhizobium_yuanmingense_CCBAU_05623	Bradyrhizobium_erythrophlei_GAS401	0.7954	0.2046
Bradyrhizobium_yuanmingense_CCBAU_05623	Bradyrhizobium_sp_CCH4-A6	0.7797	0.2203
Bradyrhizobium_yuanmingense_CCBAU_05623	Bradyrhizobium_sp_CCH10-C7	0.7797	0.2203
Bradyrhizobium_yuanmingense_CCBAU_05623	Rhizobium_lupini_HPC_L	0.7389	0.2611
Bradyrhizobium_yuanmingense_CCBAU_05623	Mesorhizobium_ciceri_WSM1271	0.7543	0.2457
Bradyrhizobium_yuanmingense_BR3267	Bradyrhizobium_sp_DOA9	0.933	0.067
Bradyrhizobium_yuanmingense_BR3267	Bradyrhizobium_sp_WSM1743	0.9092	0.0908
Bradyrhizobium_yuanmingense_BR3267	Bradyrhizobium_japonicum_in8p8	0.8947	0.1053
Bradyrhizobium_yuanmingense_BR3267	Bradyrhizobium_japonicum_is5	0.8946	0.1054
Bradyrhizobium_yuanmingense_BR3267	Bradyrhizobium_sp_Leaf396	0.8927	0.1073
Bradyrhizobium_yuanmingense_BR3267	Bradyrhizobium_japonicum_USDA_135	0.9081	0.0919
Bradyrhizobium_yuanmingense_BR3267	Bradyrhizobium_liaoningense_CCBAU_05525	0.8877	0.1123
Bradyrhizobium_yuanmingense_BR3267	Bradyrhizobium_liaoningense_CCBAU_83689	0.9111	0.0889
Bradyrhizobium_yuanmingense_BR3267	Bradyrhizobium_liaoningense_CCNWSX0360	0.9033	0.0967
Bradyrhizobium_yuanmingense_BR3267	Bradyrhizobium_sp_CCBAU_43298	0.8816	0.1184
Bradyrhizobium_yuanmingense_BR3267	Bradyrhizobium_sp_CCH5-F6	0.9003	0.0997
Bradyrhizobium_yuanmingense_BR3267	Bradyrhizobium_sp_CCGE-LA001	0.8933	0.1067
Bradyrhizobium_yuanmingense_BR3267	Bradyrhizobium_sp_DOA1	0.8927	0.1073
Bradyrhizobium_yuanmingense_BR3267	Bradyrhizobium_daqingense_CGMCC_1_10947	0.8926	0.1074
Bradyrhizobium_yuanmingense_BR3267	Bradyrhizobium_sp_Rc2d	0.8938	0.1062
Bradyrhizobium_yuanmingense_BR3267	Bradyrhizobium_sp_CCBAU_15544	0.8938	0.1062
Bradyrhizobium_yuanmingense_BR3267	Bradyrhizobium_sp_CCBAU_15635	0.8942	0.1058
Bradyrhizobium_yuanmingense_BR3267	Bradyrhizobium_japonicum_USDA_4	0.8936	0.1064
Bradyrhizobium_yuanmingense_BR3267	Bradyrhizobium_sp_CCBAU_15615	0.8937	0.1063
Bradyrhizobium_yuanmingense_BR3267	Bradyrhizobium_sp_ERR11	0.8969	0.1031
Bradyrhizobium_yuanmingense_BR3267	Bradyrhizobium_sp_Rc3b	0.8958	0.1042
Bradyrhizobium_yuanmingense_BR3267	Bradyrhizobium_sp_WSM2793	0.8954	0.1046
Bradyrhizobium_yuanmingense_BR3267	Bradyrhizobium_japonicum_22	0.8957	0.1043
Bradyrhizobium_yuanmingense_BR3267	Bradyrhizobium_sp_AT1	0.894	0.106
Bradyrhizobium_yuanmingense_BR3267	Bradyrhizobium_diazoefficiens_SEMIA_5080	0.8919	0.1081
Bradyrhizobium_yuanmingense_BR3267	Bradyrhizobium_japonicum_USDA_122	0.8922	0.1078
Bradyrhizobium_yuanmingense_BR3267	Bradyrhizobium_japonicum_Is-1	0.8919	0.1081
Bradyrhizobium_yuanmingense_BR3267	Bradyrhizobium_diazoefficiens_NK6	0.8923	0.1077
Bradyrhizobium_yuanmingense_BR3267	Bradyrhizobium_sp_CCBAU_41267	0.8917	0.1083
Bradyrhizobium_yuanmingense_BR3267	Bradyrhizobium_diazoefficiens_USDA_110	0.891	0.109
Bradyrhizobium_yuanmingense_BR3267	Bradyrhizobium_sp_WSM2254	0.8901	0.1099
Bradyrhizobium_yuanmingense_BR3267	Bradyrhizobium_sp_CF659	0.8944	0.1056
Bradyrhizobium_yuanmingense_BR3267	Bradyrhizobium_sp_YR681	0.8889	0.1111
Bradyrhizobium_yuanmingense_BR3267	Bradyrhizobium_huanghuaihaiense_CGMCC_1_10948	0.8962	0.1038
Bradyrhizobium_yuanmingense_BR3267	Bradyrhizobium_japonicum_USDA_124	0.8957	0.1043
Bradyrhizobium_yuanmingense_BR3267	Bradyrhizobium_stylosanthis_BR_446	0.8918	0.1082
Bradyrhizobium_yuanmingense_BR3267	Bradyrhizobium_arachidis_LMG_26795	0.8901	0.1099
Bradyrhizobium_yuanmingense_BR3267	Bradyrhizobium_sp_USDA_3384	0.8892	0.1108
Bradyrhizobium_yuanmingense_BR3267	Bradyrhizobium_japonicum_E109	0.8868	0.1132
Bradyrhizobium_yuanmingense_BR3267	Bradyrhizobium_japonicum_FN1	0.8875	0.1125
Bradyrhizobium_yuanmingense_BR3267	Bradyrhizobium_japonicum_USDA_6	0.8877	0.1123
Bradyrhizobium_yuanmingense_BR3267	Bradyrhizobium_japonicum_CCBAU_25435	0.8861	0.1139
Bradyrhizobium_yuanmingense_BR3267	Bradyrhizobium_japonicum_SEMIA_5079	0.8856	0.1144
Bradyrhizobium_yuanmingense_BR3267	Bradyrhizobium_japonicum_CCBAU_15618	0.8873	0.1127
Bradyrhizobium_yuanmingense_BR3267	Bradyrhizobium_japonicum_Is-34	0.8873	0.1127
Bradyrhizobium_yuanmingense_BR3267	Bradyrhizobium_japonicum_USDA_38	0.8874	0.1126
Bradyrhizobium_yuanmingense_BR3267	Bradyrhizobium_japonicum_USDA_123	0.8869	0.1131
Bradyrhizobium_yuanmingense_BR3267	Bradyrhizobium_japonicum_CCBAU_15354	0.8879	0.1121
Bradyrhizobium_yuanmingense_BR3267	Bradyrhizobium_japonicum_CCBA_15517	0.8873	0.1127
Bradyrhizobium_yuanmingense_BR3267	Bradyrhizobium_japonicum_CCBAU_83623	0.8872	0.1128
Bradyrhizobium_yuanmingense_BR3267	Bradyrhizobium_sp_G22	0.8866	0.1134
Bradyrhizobium_yuanmingense_BR3267	Bradyrhizobium_sp_OK095	0.8824	0.1176
Bradyrhizobium_yuanmingense_BR3267	Bradyrhizobium_sp_S23321	0.8835	0.1165
Bradyrhizobium_yuanmingense_BR3267	Bradyrhizobium_sp_BF49	0.8816	0.1184
Bradyrhizobium_yuanmingense_BR3267	Bradyrhizobium_sp_WSM471	0.8802	0.1198
Bradyrhizobium_yuanmingense_BR3267	Bradyrhizobium_sp_WSM1253	0.8824	0.1176
Bradyrhizobium_yuanmingense_BR3267	Bradyrhizobium_sp_URHA0013	0.8827	0.1173
Bradyrhizobium_yuanmingense_BR3267	Bradyrhizobium_sp_WSM1417	0.8816	0.1184
Bradyrhizobium_yuanmingense_BR3267	Bradyrhizobium_sp_WSM4349	0.8796	0.1204
Bradyrhizobium_yuanmingense_BR3267	Bradyrhizobium_sp_LTSP849	0.8753	0.1247
Bradyrhizobium_yuanmingense_BR3267	Bradyrhizobium_sp_LTSP857	0.8753	0.1247
Bradyrhizobium_yuanmingense_BR3267	Bradyrhizobium_sp_WSM3983	0.8783	0.1217
Bradyrhizobium_yuanmingense_BR3267	Bradyrhizobium_sp_Gha	0.8719	0.1281
Bradyrhizobium_yuanmingense_BR3267	Bradyrhizobium_sp_Cp5_3	0.8762	0.1238
Bradyrhizobium_yuanmingense_BR3267	Bradyrhizobium_neotropicale_BR_10247	0.8765	0.1235
Bradyrhizobium_yuanmingense_BR3267	Bradyrhizobium_manausense_BR3351	0.8726	0.1274
Bradyrhizobium_yuanmingense_BR3267	Bradyrhizobium_sp_Ghvi	0.8742	0.1258
Bradyrhizobium_yuanmingense_BR3267	Bradyrhizobium_sp_BR_10245	0.8754	0.1246
Bradyrhizobium_yuanmingense_BR3267	Bradyrhizobium_sp_Ec3_3	0.8578	0.1422
Bradyrhizobium_yuanmingense_BR3267	Bradyrhizobium_elkanii_587	0.8346	0.1654
Bradyrhizobium_yuanmingense_BR3267	Bradyrhizobium_elkanii_CCBAU_05737	0.8342	0.1658
Bradyrhizobium_yuanmingense_BR3267	Bradyrhizobium_elkanii_USDA_94	0.8343	0.1657
Bradyrhizobium_yuanmingense_BR3267	Bradyrhizobium_elkanii_BLY6-1	0.8346	0.1654
Bradyrhizobium_yuanmingense_BR3267	Bradyrhizobium_elkanii_BLY3-8	0.8346	0.1654
Bradyrhizobium_yuanmingense_BR3267	Bradyrhizobium_elkanii_USDA_76	0.8349	0.1651
Bradyrhizobium_yuanmingense_BR3267	Bradyrhizobium_elkanii_CCBAU_43297	0.8359	0.1641
Bradyrhizobium_yuanmingense_BR3267	Bradyrhizobium_elkanii_USDA_3254	0.8345	0.1655
Bradyrhizobium_yuanmingense_BR3267	Bradyrhizobium_elkanii_USDA_3259	0.8347	0.1653
Bradyrhizobium_yuanmingense_BR3267	Bradyrhizobium_pachyrhizi_PAC_48	0.8344	0.1656
Bradyrhizobium_yuanmingense_BR3267	Bradyrhizobium_sp_R5	0.835	0.165
Bradyrhizobium_yuanmingense_BR3267	Bradyrhizobium_pachyrhizi_BR3262	0.8334	0.1666
Bradyrhizobium_yuanmingense_BR3267	Bradyrhizobium_sp_DFCI-1	0.8299	0.1701
Bradyrhizobium_yuanmingense_BR3267	Bradyrhizobium_sp_17-4	0.8362	0.1638
Bradyrhizobium_yuanmingense_BR3267	Bradyrhizobium_viridifuturi_SEMIA_690	0.8342	0.1658
Bradyrhizobium_yuanmingense_BR3267	Bradyrhizobium_tropiciagri_SEMIA_6148	0.8344	0.1656
Bradyrhizobium_yuanmingense_BR3267	Bradyrhizobium_erythrophlei_MT12	0.8312	0.1688
Bradyrhizobium_yuanmingense_BR3267	Bradyrhizobium_embrapense_SEMIA_6208	0.8328	0.1672
Bradyrhizobium_yuanmingense_BR3267	Bradyrhizobium_elkanii_UASWS1015	0.8288	0.1712
Bradyrhizobium_yuanmingense_BR3267	Bradyrhizobium_sp_OHSU_III	0.8283	0.1717
Bradyrhizobium_yuanmingense_BR3267	Bradyrhizobium_sp_th_b2	0.8325	0.1675
Bradyrhizobium_yuanmingense_BR3267	Bradyrhizobium_sp_LTSP885	0.8257	0.1743
Bradyrhizobium_yuanmingense_BR3267	Bradyrhizobium_sp_LTSPM299	0.8232	0.1768
Bradyrhizobium_yuanmingense_BR3267	Bradyrhizobium_sp_BR_10303	0.8284	0.1716
Bradyrhizobium_yuanmingense_BR3267	Bradyrhizobium_sp_Ai1a-2	0.8264	0.1736
Bradyrhizobium_yuanmingense_BR3267	Bradyrhizobium_elkanii_WSM2783	0.8277	0.1723
Bradyrhizobium_yuanmingense_BR3267	Bradyrhizobium_sp_ORS_278	0.8204	0.1796
Bradyrhizobium_yuanmingense_BR3267	Bradyrhizobium_sp_ORS_375	0.819	0.181
Bradyrhizobium_yuanmingense_BR3267	Bradyrhizobium_sp_STM_3809	0.8205	0.1795
Bradyrhizobium_yuanmingense_BR3267	Bradyrhizobium_sp_BTAi1	0.8144	0.1856
Bradyrhizobium_yuanmingense_BR3267	Bradyrhizobium_oligotrophicum_S58	0.8166	0.1834
Bradyrhizobium_yuanmingense_BR3267	Bradyrhizobium_sp_ORS_285	0.8169	0.1831
Bradyrhizobium_yuanmingense_BR3267	Bradyrhizobium_sp_STM_3843	0.8135	0.1865
Bradyrhizobium_yuanmingense_BR3267	Bradyrhizobium_sp_Tv2a-2	0.8156	0.1844
Bradyrhizobium_yuanmingense_BR3267	Bradyrhizobium_sp_ARR65	0.8118	0.1882
Bradyrhizobium_yuanmingense_BR3267	Bradyrhizobium_elkanii_WSM1741	0.8192	0.1808
Bradyrhizobium_yuanmingense_BR3267	Bradyrhizobium_retamae_Ro19	0.8173	0.1827
Bradyrhizobium_yuanmingense_BR3267	Bradyrhizobium_sp_LMTR_3	0.8196	0.1804
Bradyrhizobium_yuanmingense_BR3267	Bradyrhizobium_icense_LMTR_13	0.8197	0.1803
Bradyrhizobium_yuanmingense_BR3267	Bradyrhizobium_valentinum_LmjM3	0.8168	0.1832
Bradyrhizobium_yuanmingense_BR3267	Bradyrhizobium_valentinum_LmjM6	0.8169	0.1831
Bradyrhizobium_yuanmingense_BR3267	Bradyrhizobium_jicamae_PAC68	0.8194	0.1806
Bradyrhizobium_yuanmingense_BR3267	Bradyrhizobium_paxllaeri_LMTR_21	0.8198	0.1802
Bradyrhizobium_yuanmingense_BR3267	Bradyrhizobium_lablabi_GAS522	0.8229	0.1771
Bradyrhizobium_yuanmingense_BR3267	Bradyrhizobium_ottawaense_GAS524	0.8229	0.1771
Bradyrhizobium_yuanmingense_BR3267	Bradyrhizobium_sp_URHA0002	0.8194	0.1806
Bradyrhizobium_yuanmingense_BR3267	Bradyrhizobium_erythrophlei_GAS138	0.8117	0.1883
Bradyrhizobium_yuanmingense_BR3267	Bradyrhizobium_sp_URHD0069	0.8109	0.1891
Bradyrhizobium_yuanmingense_BR3267	Bradyrhizobium_canariense_GAS369	0.8082	0.1918
Bradyrhizobium_yuanmingense_BR3267	Bradyrhizobium_erythrophlei_GAS242	0.8197	0.1803
Bradyrhizobium_yuanmingense_BR3267	Bradyrhizobium_erythrophlei_GAS401	0.8051	0.1949
Bradyrhizobium_yuanmingense_BR3267	Bradyrhizobium_sp_CCH4-A6	0.7926	0.2074
Bradyrhizobium_yuanmingense_BR3267	Bradyrhizobium_sp_CCH10-C7	0.7914	0.2086
Bradyrhizobium_yuanmingense_BR3267	Rhizobium_lupini_HPC_L	0.7431	0.2569
Bradyrhizobium_yuanmingense_BR3267	Mesorhizobium_ciceri_WSM1271	0.768	0.232
Bradyrhizobium_sp_DOA9	Bradyrhizobium_sp_WSM1743	0.9088	0.0912
Bradyrhizobium_sp_DOA9	Bradyrhizobium_japonicum_in8p8	0.8964	0.1036
Bradyrhizobium_sp_DOA9	Bradyrhizobium_japonicum_is5	0.8967	0.1033
Bradyrhizobium_sp_DOA9	Bradyrhizobium_sp_Leaf396	0.8924	0.1076
Bradyrhizobium_sp_DOA9	Bradyrhizobium_japonicum_USDA_135	0.9048	0.0952
Bradyrhizobium_sp_DOA9	Bradyrhizobium_liaoningense_CCBAU_05525	0.8913	0.1087
Bradyrhizobium_sp_DOA9	Bradyrhizobium_liaoningense_CCBAU_83689	0.911	0.089
Bradyrhizobium_sp_DOA9	Bradyrhizobium_liaoningense_CCNWSX0360	0.901	0.099
Bradyrhizobium_sp_DOA9	Bradyrhizobium_sp_CCBAU_43298	0.8856	0.1144
Bradyrhizobium_sp_DOA9	Bradyrhizobium_sp_CCH5-F6	0.8945	0.1055
Bradyrhizobium_sp_DOA9	Bradyrhizobium_sp_CCGE-LA001	0.8924	0.1076
Bradyrhizobium_sp_DOA9	Bradyrhizobium_sp_DOA1	0.8926	0.1074
Bradyrhizobium_sp_DOA9	Bradyrhizobium_daqingense_CGMCC_1_10947	0.8935	0.1065
Bradyrhizobium_sp_DOA9	Bradyrhizobium_sp_Rc2d	0.8933	0.1067
Bradyrhizobium_sp_DOA9	Bradyrhizobium_sp_CCBAU_15544	0.8944	0.1056
Bradyrhizobium_sp_DOA9	Bradyrhizobium_sp_CCBAU_15635	0.8946	0.1054
Bradyrhizobium_sp_DOA9	Bradyrhizobium_japonicum_USDA_4	0.8944	0.1056
Bradyrhizobium_sp_DOA9	Bradyrhizobium_sp_CCBAU_15615	0.8947	0.1053
Bradyrhizobium_sp_DOA9	Bradyrhizobium_sp_ERR11	0.8939	0.1061
Bradyrhizobium_sp_DOA9	Bradyrhizobium_sp_Rc3b	0.8954	0.1046
Bradyrhizobium_sp_DOA9	Bradyrhizobium_sp_WSM2793	0.8945	0.1055
Bradyrhizobium_sp_DOA9	Bradyrhizobium_japonicum_22	0.8971	0.1029
Bradyrhizobium_sp_DOA9	Bradyrhizobium_sp_AT1	0.8933	0.1067
Bradyrhizobium_sp_DOA9	Bradyrhizobium_diazoefficiens_SEMIA_5080	0.8902	0.1098
Bradyrhizobium_sp_DOA9	Bradyrhizobium_japonicum_USDA_122	0.8902	0.1098
Bradyrhizobium_sp_DOA9	Bradyrhizobium_japonicum_Is-1	0.8901	0.1099
Bradyrhizobium_sp_DOA9	Bradyrhizobium_diazoefficiens_NK6	0.8903	0.1097
Bradyrhizobium_sp_DOA9	Bradyrhizobium_sp_CCBAU_41267	0.89	0.11
Bradyrhizobium_sp_DOA9	Bradyrhizobium_diazoefficiens_USDA_110	0.8903	0.1097
Bradyrhizobium_sp_DOA9	Bradyrhizobium_sp_WSM2254	0.8907	0.1093
Bradyrhizobium_sp_DOA9	Bradyrhizobium_sp_CF659	0.8921	0.1079
Bradyrhizobium_sp_DOA9	Bradyrhizobium_sp_YR681	0.8889	0.1111
Bradyrhizobium_sp_DOA9	Bradyrhizobium_huanghuaihaiense_CGMCC_1_10948	0.8951	0.1049
Bradyrhizobium_sp_DOA9	Bradyrhizobium_japonicum_USDA_124	0.8952	0.1048
Bradyrhizobium_sp_DOA9	Bradyrhizobium_stylosanthis_BR_446	0.8912	0.1088
Bradyrhizobium_sp_DOA9	Bradyrhizobium_arachidis_LMG_26795	0.8898	0.1102
Bradyrhizobium_sp_DOA9	Bradyrhizobium_sp_USDA_3384	0.8895	0.1105
Bradyrhizobium_sp_DOA9	Bradyrhizobium_japonicum_E109	0.8873	0.1127
Bradyrhizobium_sp_DOA9	Bradyrhizobium_japonicum_FN1	0.8873	0.1127
Bradyrhizobium_sp_DOA9	Bradyrhizobium_japonicum_USDA_6	0.8873	0.1127
Bradyrhizobium_sp_DOA9	Bradyrhizobium_japonicum_CCBAU_25435	0.8872	0.1128
Bradyrhizobium_sp_DOA9	Bradyrhizobium_japonicum_SEMIA_5079	0.8873	0.1127
Bradyrhizobium_sp_DOA9	Bradyrhizobium_japonicum_CCBAU_15618	0.8871	0.1129
Bradyrhizobium_sp_DOA9	Bradyrhizobium_japonicum_Is-34	0.887	0.113
Bradyrhizobium_sp_DOA9	Bradyrhizobium_japonicum_USDA_38	0.887	0.113
Bradyrhizobium_sp_DOA9	Bradyrhizobium_japonicum_USDA_123	0.8859	0.1141
Bradyrhizobium_sp_DOA9	Bradyrhizobium_japonicum_CCBAU_15354	0.8861	0.1139
Bradyrhizobium_sp_DOA9	Bradyrhizobium_japonicum_CCBA_15517	0.8861	0.1139
Bradyrhizobium_sp_DOA9	Bradyrhizobium_japonicum_CCBAU_83623	0.886	0.114
Bradyrhizobium_sp_DOA9	Bradyrhizobium_sp_G22	0.8869	0.1131
Bradyrhizobium_sp_DOA9	Bradyrhizobium_sp_OK095	0.8828	0.1172
Bradyrhizobium_sp_DOA9	Bradyrhizobium_sp_S23321	0.8831	0.1169
Bradyrhizobium_sp_DOA9	Bradyrhizobium_sp_BF49	0.8809	0.1191
Bradyrhizobium_sp_DOA9	Bradyrhizobium_sp_WSM471	0.8814	0.1186
Bradyrhizobium_sp_DOA9	Bradyrhizobium_sp_WSM1253	0.8806	0.1194
Bradyrhizobium_sp_DOA9	Bradyrhizobium_sp_URHA0013	0.881	0.119
Bradyrhizobium_sp_DOA9	Bradyrhizobium_sp_WSM1417	0.881	0.119
Bradyrhizobium_sp_DOA9	Bradyrhizobium_sp_WSM4349	0.8799	0.1201
Bradyrhizobium_sp_DOA9	Bradyrhizobium_sp_LTSP849	0.8771	0.1229
Bradyrhizobium_sp_DOA9	Bradyrhizobium_sp_LTSP857	0.8771	0.1229
Bradyrhizobium_sp_DOA9	Bradyrhizobium_sp_WSM3983	0.8761	0.1239
Bradyrhizobium_sp_DOA9	Bradyrhizobium_sp_Gha	0.8705	0.1295
Bradyrhizobium_sp_DOA9	Bradyrhizobium_sp_Cp5_3	0.8741	0.1259
Bradyrhizobium_sp_DOA9	Bradyrhizobium_neotropicale_BR_10247	0.8739	0.1261
Bradyrhizobium_sp_DOA9	Bradyrhizobium_manausense_BR3351	0.8742	0.1258
Bradyrhizobium_sp_DOA9	Bradyrhizobium_sp_Ghvi	0.8729	0.1271
Bradyrhizobium_sp_DOA9	Bradyrhizobium_sp_BR_10245	0.874	0.126
Bradyrhizobium_sp_DOA9	Bradyrhizobium_sp_Ec3_3	0.8578	0.1422
Bradyrhizobium_sp_DOA9	Bradyrhizobium_elkanii_587	0.8285	0.1715
Bradyrhizobium_sp_DOA9	Bradyrhizobium_elkanii_CCBAU_05737	0.828	0.172
Bradyrhizobium_sp_DOA9	Bradyrhizobium_elkanii_USDA_94	0.8277	0.1723
Bradyrhizobium_sp_DOA9	Bradyrhizobium_elkanii_BLY6-1	0.8284	0.1716
Bradyrhizobium_sp_DOA9	Bradyrhizobium_elkanii_BLY3-8	0.8284	0.1716
Bradyrhizobium_sp_DOA9	Bradyrhizobium_elkanii_USDA_76	0.8283	0.1717
Bradyrhizobium_sp_DOA9	Bradyrhizobium_elkanii_CCBAU_43297	0.8281	0.1719
Bradyrhizobium_sp_DOA9	Bradyrhizobium_elkanii_USDA_3254	0.8277	0.1723
Bradyrhizobium_sp_DOA9	Bradyrhizobium_elkanii_USDA_3259	0.8278	0.1722
Bradyrhizobium_sp_DOA9	Bradyrhizobium_pachyrhizi_PAC_48	0.8275	0.1725
Bradyrhizobium_sp_DOA9	Bradyrhizobium_sp_R5	0.8282	0.1718
Bradyrhizobium_sp_DOA9	Bradyrhizobium_pachyrhizi_BR3262	0.8284	0.1716
Bradyrhizobium_sp_DOA9	Bradyrhizobium_sp_DFCI-1	0.8287	0.1713
Bradyrhizobium_sp_DOA9	Bradyrhizobium_sp_17-4	0.8338	0.1662
Bradyrhizobium_sp_DOA9	Bradyrhizobium_viridifuturi_SEMIA_690	0.8279	0.1721
Bradyrhizobium_sp_DOA9	Bradyrhizobium_tropiciagri_SEMIA_6148	0.8279	0.1721
Bradyrhizobium_sp_DOA9	Bradyrhizobium_erythrophlei_MT12	0.8281	0.1719
Bradyrhizobium_sp_DOA9	Bradyrhizobium_embrapense_SEMIA_6208	0.8268	0.1732
Bradyrhizobium_sp_DOA9	Bradyrhizobium_elkanii_UASWS1015	0.8281	0.1719
Bradyrhizobium_sp_DOA9	Bradyrhizobium_sp_OHSU_III	0.828	0.172
Bradyrhizobium_sp_DOA9	Bradyrhizobium_sp_th_b2	0.8273	0.1727
Bradyrhizobium_sp_DOA9	Bradyrhizobium_sp_LTSP885	0.8241	0.1759
Bradyrhizobium_sp_DOA9	Bradyrhizobium_sp_LTSPM299	0.8233	0.1767
Bradyrhizobium_sp_DOA9	Bradyrhizobium_sp_BR_10303	0.8244	0.1756
Bradyrhizobium_sp_DOA9	Bradyrhizobium_sp_Ai1a-2	0.8222	0.1778
Bradyrhizobium_sp_DOA9	Bradyrhizobium_elkanii_WSM2783	0.8218	0.1782
Bradyrhizobium_sp_DOA9	Bradyrhizobium_sp_ORS_278	0.8185	0.1815
Bradyrhizobium_sp_DOA9	Bradyrhizobium_sp_ORS_375	0.8199	0.1801
Bradyrhizobium_sp_DOA9	Bradyrhizobium_sp_STM_3809	0.8213	0.1787
Bradyrhizobium_sp_DOA9	Bradyrhizobium_sp_BTAi1	0.817	0.183
Bradyrhizobium_sp_DOA9	Bradyrhizobium_oligotrophicum_S58	0.8192	0.1808
Bradyrhizobium_sp_DOA9	Bradyrhizobium_sp_ORS_285	0.8195	0.1805
Bradyrhizobium_sp_DOA9	Bradyrhizobium_sp_STM_3843	0.8142	0.1858
Bradyrhizobium_sp_DOA9	Bradyrhizobium_sp_Tv2a-2	0.8162	0.1838
Bradyrhizobium_sp_DOA9	Bradyrhizobium_sp_ARR65	0.8117	0.1883
Bradyrhizobium_sp_DOA9	Bradyrhizobium_elkanii_WSM1741	0.8163	0.1837
Bradyrhizobium_sp_DOA9	Bradyrhizobium_retamae_Ro19	0.8161	0.1839
Bradyrhizobium_sp_DOA9	Bradyrhizobium_sp_LMTR_3	0.8173	0.1827
Bradyrhizobium_sp_DOA9	Bradyrhizobium_icense_LMTR_13	0.8166	0.1834
Bradyrhizobium_sp_DOA9	Bradyrhizobium_valentinum_LmjM3	0.8169	0.1831
Bradyrhizobium_sp_DOA9	Bradyrhizobium_valentinum_LmjM6	0.8168	0.1832
Bradyrhizobium_sp_DOA9	Bradyrhizobium_jicamae_PAC68	0.8189	0.1811
Bradyrhizobium_sp_DOA9	Bradyrhizobium_paxllaeri_LMTR_21	0.8191	0.1809
Bradyrhizobium_sp_DOA9	Bradyrhizobium_lablabi_GAS522	0.8208	0.1792
Bradyrhizobium_sp_DOA9	Bradyrhizobium_ottawaense_GAS524	0.8208	0.1792
Bradyrhizobium_sp_DOA9	Bradyrhizobium_sp_URHA0002	0.8166	0.1834
Bradyrhizobium_sp_DOA9	Bradyrhizobium_erythrophlei_GAS138	0.809	0.191
Bradyrhizobium_sp_DOA9	Bradyrhizobium_sp_URHD0069	0.8057	0.1943
Bradyrhizobium_sp_DOA9	Bradyrhizobium_canariense_GAS369	0.8061	0.1939
Bradyrhizobium_sp_DOA9	Bradyrhizobium_erythrophlei_GAS242	0.8152	0.1848
Bradyrhizobium_sp_DOA9	Bradyrhizobium_erythrophlei_GAS401	0.806	0.194
Bradyrhizobium_sp_DOA9	Bradyrhizobium_sp_CCH4-A6	0.7891	0.2109
Bradyrhizobium_sp_DOA9	Bradyrhizobium_sp_CCH10-C7	0.7886	0.2114
Bradyrhizobium_sp_DOA9	Rhizobium_lupini_HPC_L	0.7488	0.2512
Bradyrhizobium_sp_DOA9	Mesorhizobium_ciceri_WSM1271	0.7611	0.2389
Bradyrhizobium_sp_WSM1743	Bradyrhizobium_japonicum_in8p8	0.8986	0.1014
Bradyrhizobium_sp_WSM1743	Bradyrhizobium_japonicum_is5	0.8975	0.1025
Bradyrhizobium_sp_WSM1743	Bradyrhizobium_sp_Leaf396	0.9001	0.0999
Bradyrhizobium_sp_WSM1743	Bradyrhizobium_japonicum_USDA_135	0.9169	0.0831
Bradyrhizobium_sp_WSM1743	Bradyrhizobium_liaoningense_CCBAU_05525	0.9063	0.0937
Bradyrhizobium_sp_WSM1743	Bradyrhizobium_liaoningense_CCBAU_83689	0.9215	0.0785
Bradyrhizobium_sp_WSM1743	Bradyrhizobium_liaoningense_CCNWSX0360	0.909	0.091
Bradyrhizobium_sp_WSM1743	Bradyrhizobium_sp_CCBAU_43298	0.8952	0.1048
Bradyrhizobium_sp_WSM1743	Bradyrhizobium_sp_CCH5-F6	0.8987	0.1013
Bradyrhizobium_sp_WSM1743	Bradyrhizobium_sp_CCGE-LA001	0.8947	0.1053
Bradyrhizobium_sp_WSM1743	Bradyrhizobium_sp_DOA1	0.8889	0.1111
Bradyrhizobium_sp_WSM1743	Bradyrhizobium_daqingense_CGMCC_1_10947	0.8983	0.1017
Bradyrhizobium_sp_WSM1743	Bradyrhizobium_sp_Rc2d	0.8992	0.1008
Bradyrhizobium_sp_WSM1743	Bradyrhizobium_sp_CCBAU_15544	0.8956	0.1044
Bradyrhizobium_sp_WSM1743	Bradyrhizobium_sp_CCBAU_15635	0.8962	0.1038
Bradyrhizobium_sp_WSM1743	Bradyrhizobium_japonicum_USDA_4	0.8962	0.1038
Bradyrhizobium_sp_WSM1743	Bradyrhizobium_sp_CCBAU_15615	0.8958	0.1042
Bradyrhizobium_sp_WSM1743	Bradyrhizobium_sp_ERR11	0.8962	0.1038
Bradyrhizobium_sp_WSM1743	Bradyrhizobium_sp_Rc3b	0.8949	0.1051
Bradyrhizobium_sp_WSM1743	Bradyrhizobium_sp_WSM2793	0.9031	0.0969
Bradyrhizobium_sp_WSM1743	Bradyrhizobium_japonicum_22	0.8913	0.1087
Bradyrhizobium_sp_WSM1743	Bradyrhizobium_sp_AT1	0.89	0.11
Bradyrhizobium_sp_WSM1743	Bradyrhizobium_diazoefficiens_SEMIA_5080	0.8944	0.1056
Bradyrhizobium_sp_WSM1743	Bradyrhizobium_japonicum_USDA_122	0.8944	0.1056
Bradyrhizobium_sp_WSM1743	Bradyrhizobium_japonicum_Is-1	0.8944	0.1056
Bradyrhizobium_sp_WSM1743	Bradyrhizobium_diazoefficiens_NK6	0.8934	0.1066
Bradyrhizobium_sp_WSM1743	Bradyrhizobium_sp_CCBAU_41267	0.8935	0.1065
Bradyrhizobium_sp_WSM1743	Bradyrhizobium_diazoefficiens_USDA_110	0.8938	0.1062
Bradyrhizobium_sp_WSM1743	Bradyrhizobium_sp_WSM2254	0.8954	0.1046
Bradyrhizobium_sp_WSM1743	Bradyrhizobium_sp_CF659	0.8959	0.1041
Bradyrhizobium_sp_WSM1743	Bradyrhizobium_sp_YR681	0.8874	0.1126
Bradyrhizobium_sp_WSM1743	Bradyrhizobium_huanghuaihaiense_CGMCC_1_10948	0.9007	0.0993
Bradyrhizobium_sp_WSM1743	Bradyrhizobium_japonicum_USDA_124	0.9006	0.0994
Bradyrhizobium_sp_WSM1743	Bradyrhizobium_stylosanthis_BR_446	0.8939	0.1061
Bradyrhizobium_sp_WSM1743	Bradyrhizobium_arachidis_LMG_26795	0.8885	0.1115
Bradyrhizobium_sp_WSM1743	Bradyrhizobium_sp_USDA_3384	0.8888	0.1112
Bradyrhizobium_sp_WSM1743	Bradyrhizobium_japonicum_E109	0.8884	0.1116
Bradyrhizobium_sp_WSM1743	Bradyrhizobium_japonicum_FN1	0.8883	0.1117
Bradyrhizobium_sp_WSM1743	Bradyrhizobium_japonicum_USDA_6	0.8884	0.1116
Bradyrhizobium_sp_WSM1743	Bradyrhizobium_japonicum_CCBAU_25435	0.8878	0.1122
Bradyrhizobium_sp_WSM1743	Bradyrhizobium_japonicum_SEMIA_5079	0.8885	0.1115
Bradyrhizobium_sp_WSM1743	Bradyrhizobium_japonicum_CCBAU_15618	0.8879	0.1121
Bradyrhizobium_sp_WSM1743	Bradyrhizobium_japonicum_Is-34	0.8865	0.1135
Bradyrhizobium_sp_WSM1743	Bradyrhizobium_japonicum_USDA_38	0.8863	0.1137
Bradyrhizobium_sp_WSM1743	Bradyrhizobium_japonicum_USDA_123	0.8846	0.1154
Bradyrhizobium_sp_WSM1743	Bradyrhizobium_japonicum_CCBAU_15354	0.8864	0.1136
Bradyrhizobium_sp_WSM1743	Bradyrhizobium_japonicum_CCBA_15517	0.8854	0.1146
Bradyrhizobium_sp_WSM1743	Bradyrhizobium_japonicum_CCBAU_83623	0.8865	0.1135
Bradyrhizobium_sp_WSM1743	Bradyrhizobium_sp_G22	0.8867	0.1133
Bradyrhizobium_sp_WSM1743	Bradyrhizobium_sp_OK095	0.8833	0.1167
Bradyrhizobium_sp_WSM1743	Bradyrhizobium_sp_S23321	0.8799	0.1201
Bradyrhizobium_sp_WSM1743	Bradyrhizobium_sp_BF49	0.8826	0.1174
Bradyrhizobium_sp_WSM1743	Bradyrhizobium_sp_WSM471	0.8823	0.1177
Bradyrhizobium_sp_WSM1743	Bradyrhizobium_sp_WSM1253	0.8808	0.1192
Bradyrhizobium_sp_WSM1743	Bradyrhizobium_sp_URHA0013	0.878	0.122
Bradyrhizobium_sp_WSM1743	Bradyrhizobium_sp_WSM1417	0.8822	0.1178
Bradyrhizobium_sp_WSM1743	Bradyrhizobium_sp_WSM4349	0.8786	0.1214
Bradyrhizobium_sp_WSM1743	Bradyrhizobium_sp_LTSP849	0.8739	0.1261
Bradyrhizobium_sp_WSM1743	Bradyrhizobium_sp_LTSP857	0.8746	0.1254
Bradyrhizobium_sp_WSM1743	Bradyrhizobium_sp_WSM3983	0.8748	0.1252
Bradyrhizobium_sp_WSM1743	Bradyrhizobium_sp_Gha	0.8665	0.1335
Bradyrhizobium_sp_WSM1743	Bradyrhizobium_sp_Cp5_3	0.8703	0.1297
Bradyrhizobium_sp_WSM1743	Bradyrhizobium_neotropicale_BR_10247	0.8702	0.1298
Bradyrhizobium_sp_WSM1743	Bradyrhizobium_manausense_BR3351	0.8683	0.1317
Bradyrhizobium_sp_WSM1743	Bradyrhizobium_sp_Ghvi	0.8712	0.1288
Bradyrhizobium_sp_WSM1743	Bradyrhizobium_sp_BR_10245	0.8695	0.1305
Bradyrhizobium_sp_WSM1743	Bradyrhizobium_sp_Ec3_3	0.857	0.143
Bradyrhizobium_sp_WSM1743	Bradyrhizobium_elkanii_587	0.8239	0.1761
Bradyrhizobium_sp_WSM1743	Bradyrhizobium_elkanii_CCBAU_05737	0.826	0.174
Bradyrhizobium_sp_WSM1743	Bradyrhizobium_elkanii_USDA_94	0.8273	0.1727
Bradyrhizobium_sp_WSM1743	Bradyrhizobium_elkanii_BLY6-1	0.8261	0.1739
Bradyrhizobium_sp_WSM1743	Bradyrhizobium_elkanii_BLY3-8	0.826	0.174
Bradyrhizobium_sp_WSM1743	Bradyrhizobium_elkanii_USDA_76	0.8263	0.1737
Bradyrhizobium_sp_WSM1743	Bradyrhizobium_elkanii_CCBAU_43297	0.8259	0.1741
Bradyrhizobium_sp_WSM1743	Bradyrhizobium_elkanii_USDA_3254	0.8261	0.1739
Bradyrhizobium_sp_WSM1743	Bradyrhizobium_elkanii_USDA_3259	0.8261	0.1739
Bradyrhizobium_sp_WSM1743	Bradyrhizobium_pachyrhizi_PAC_48	0.824	0.176
Bradyrhizobium_sp_WSM1743	Bradyrhizobium_sp_R5	0.826	0.174
Bradyrhizobium_sp_WSM1743	Bradyrhizobium_pachyrhizi_BR3262	0.8263	0.1737
Bradyrhizobium_sp_WSM1743	Bradyrhizobium_sp_DFCI-1	0.8236	0.1764
Bradyrhizobium_sp_WSM1743	Bradyrhizobium_sp_17-4	0.829	0.171
Bradyrhizobium_sp_WSM1743	Bradyrhizobium_viridifuturi_SEMIA_690	0.8243	0.1757
Bradyrhizobium_sp_WSM1743	Bradyrhizobium_tropiciagri_SEMIA_6148	0.8257	0.1743
Bradyrhizobium_sp_WSM1743	Bradyrhizobium_erythrophlei_MT12	0.8235	0.1765
Bradyrhizobium_sp_WSM1743	Bradyrhizobium_embrapense_SEMIA_6208	0.8255	0.1745
Bradyrhizobium_sp_WSM1743	Bradyrhizobium_elkanii_UASWS1015	0.8209	0.1791
Bradyrhizobium_sp_WSM1743	Bradyrhizobium_sp_OHSU_III	0.8247	0.1753
Bradyrhizobium_sp_WSM1743	Bradyrhizobium_sp_th_b2	0.8228	0.1772
Bradyrhizobium_sp_WSM1743	Bradyrhizobium_sp_LTSP885	0.8213	0.1787
Bradyrhizobium_sp_WSM1743	Bradyrhizobium_sp_LTSPM299	0.8206	0.1794
Bradyrhizobium_sp_WSM1743	Bradyrhizobium_sp_BR_10303	0.821	0.179
Bradyrhizobium_sp_WSM1743	Bradyrhizobium_sp_Ai1a-2	0.8226	0.1774
Bradyrhizobium_sp_WSM1743	Bradyrhizobium_elkanii_WSM2783	0.8235	0.1765
Bradyrhizobium_sp_WSM1743	Bradyrhizobium_sp_ORS_278	0.8125	0.1875
Bradyrhizobium_sp_WSM1743	Bradyrhizobium_sp_ORS_375	0.817	0.183
Bradyrhizobium_sp_WSM1743	Bradyrhizobium_sp_STM_3809	0.8152	0.1848
Bradyrhizobium_sp_WSM1743	Bradyrhizobium_sp_BTAi1	0.8128	0.1872
Bradyrhizobium_sp_WSM1743	Bradyrhizobium_oligotrophicum_S58	0.8151	0.1849
Bradyrhizobium_sp_WSM1743	Bradyrhizobium_sp_ORS_285	0.8161	0.1839
Bradyrhizobium_sp_WSM1743	Bradyrhizobium_sp_STM_3843	0.8138	0.1862
Bradyrhizobium_sp_WSM1743	Bradyrhizobium_sp_Tv2a-2	0.8146	0.1854
Bradyrhizobium_sp_WSM1743	Bradyrhizobium_sp_ARR65	0.8113	0.1887
Bradyrhizobium_sp_WSM1743	Bradyrhizobium_elkanii_WSM1741	0.8184	0.1816
Bradyrhizobium_sp_WSM1743	Bradyrhizobium_retamae_Ro19	0.8143	0.1857
Bradyrhizobium_sp_WSM1743	Bradyrhizobium_sp_LMTR_3	0.8209	0.1791
Bradyrhizobium_sp_WSM1743	Bradyrhizobium_icense_LMTR_13	0.8177	0.1823
Bradyrhizobium_sp_WSM1743	Bradyrhizobium_valentinum_LmjM3	0.821	0.179
Bradyrhizobium_sp_WSM1743	Bradyrhizobium_valentinum_LmjM6	0.8214	0.1786
Bradyrhizobium_sp_WSM1743	Bradyrhizobium_jicamae_PAC68	0.818	0.182
Bradyrhizobium_sp_WSM1743	Bradyrhizobium_paxllaeri_LMTR_21	0.819	0.181
Bradyrhizobium_sp_WSM1743	Bradyrhizobium_lablabi_GAS522	0.8164	0.1836
Bradyrhizobium_sp_WSM1743	Bradyrhizobium_ottawaense_GAS524	0.8164	0.1836
Bradyrhizobium_sp_WSM1743	Bradyrhizobium_sp_URHA0002	0.814	0.186
Bradyrhizobium_sp_WSM1743	Bradyrhizobium_erythrophlei_GAS138	0.8097	0.1903
Bradyrhizobium_sp_WSM1743	Bradyrhizobium_sp_URHD0069	0.8013	0.1987
Bradyrhizobium_sp_WSM1743	Bradyrhizobium_canariense_GAS369	0.805	0.195
Bradyrhizobium_sp_WSM1743	Bradyrhizobium_erythrophlei_GAS242	0.8154	0.1846
Bradyrhizobium_sp_WSM1743	Bradyrhizobium_erythrophlei_GAS401	0.8017	0.1983
Bradyrhizobium_sp_WSM1743	Bradyrhizobium_sp_CCH4-A6	0.776	0.224
Bradyrhizobium_sp_WSM1743	Bradyrhizobium_sp_CCH10-C7	0.7763	0.2237
Bradyrhizobium_sp_WSM1743	Rhizobium_lupini_HPC_L	0.7375	0.2625
Bradyrhizobium_sp_WSM1743	Mesorhizobium_ciceri_WSM1271	0.751	0.249
Bradyrhizobium_japonicum_in8p8	Bradyrhizobium_japonicum_is5	1	0
Bradyrhizobium_japonicum_in8p8	Bradyrhizobium_sp_Leaf396	0.9919	0.0081
Bradyrhizobium_japonicum_in8p8	Bradyrhizobium_japonicum_USDA_135	0.9073	0.0927
Bradyrhizobium_japonicum_in8p8	Bradyrhizobium_liaoningense_CCBAU_05525	0.8752	0.1248
Bradyrhizobium_japonicum_in8p8	Bradyrhizobium_liaoningense_CCBAU_83689	0.9114	0.0886
Bradyrhizobium_japonicum_in8p8	Bradyrhizobium_liaoningense_CCNWSX0360	0.8988	0.1012
Bradyrhizobium_japonicum_in8p8	Bradyrhizobium_sp_CCBAU_43298	0.8777	0.1223
Bradyrhizobium_japonicum_in8p8	Bradyrhizobium_sp_CCH5-F6	0.8978	0.1022
Bradyrhizobium_japonicum_in8p8	Bradyrhizobium_sp_CCGE-LA001	0.8883	0.1117
Bradyrhizobium_japonicum_in8p8	Bradyrhizobium_sp_DOA1	0.8865	0.1135
Bradyrhizobium_japonicum_in8p8	Bradyrhizobium_daqingense_CGMCC_1_10947	0.8843	0.1157
Bradyrhizobium_japonicum_in8p8	Bradyrhizobium_sp_Rc2d	0.889	0.111
Bradyrhizobium_japonicum_in8p8	Bradyrhizobium_sp_CCBAU_15544	0.8883	0.1117
Bradyrhizobium_japonicum_in8p8	Bradyrhizobium_sp_CCBAU_15635	0.8883	0.1117
Bradyrhizobium_japonicum_in8p8	Bradyrhizobium_japonicum_USDA_4	0.8875	0.1125
Bradyrhizobium_japonicum_in8p8	Bradyrhizobium_sp_CCBAU_15615	0.8871	0.1129
Bradyrhizobium_japonicum_in8p8	Bradyrhizobium_sp_ERR11	0.8879	0.1121
Bradyrhizobium_japonicum_in8p8	Bradyrhizobium_sp_Rc3b	0.8891	0.1109
Bradyrhizobium_japonicum_in8p8	Bradyrhizobium_sp_WSM2793	0.8898	0.1102
Bradyrhizobium_japonicum_in8p8	Bradyrhizobium_japonicum_22	0.8872	0.1128
Bradyrhizobium_japonicum_in8p8	Bradyrhizobium_sp_AT1	0.888	0.112
Bradyrhizobium_japonicum_in8p8	Bradyrhizobium_diazoefficiens_SEMIA_5080	0.8854	0.1146
Bradyrhizobium_japonicum_in8p8	Bradyrhizobium_japonicum_USDA_122	0.8854	0.1146
Bradyrhizobium_japonicum_in8p8	Bradyrhizobium_japonicum_Is-1	0.8854	0.1146
Bradyrhizobium_japonicum_in8p8	Bradyrhizobium_diazoefficiens_NK6	0.8833	0.1167
Bradyrhizobium_japonicum_in8p8	Bradyrhizobium_sp_CCBAU_41267	0.8835	0.1165
Bradyrhizobium_japonicum_in8p8	Bradyrhizobium_diazoefficiens_USDA_110	0.8845	0.1155
Bradyrhizobium_japonicum_in8p8	Bradyrhizobium_sp_WSM2254	0.8828	0.1172
Bradyrhizobium_japonicum_in8p8	Bradyrhizobium_sp_CF659	0.8877	0.1123
Bradyrhizobium_japonicum_in8p8	Bradyrhizobium_sp_YR681	0.8815	0.1185
Bradyrhizobium_japonicum_in8p8	Bradyrhizobium_huanghuaihaiense_CGMCC_1_10948	0.8868	0.1132
Bradyrhizobium_japonicum_in8p8	Bradyrhizobium_japonicum_USDA_124	0.8847	0.1153
Bradyrhizobium_japonicum_in8p8	Bradyrhizobium_stylosanthis_BR_446	0.8838	0.1162
Bradyrhizobium_japonicum_in8p8	Bradyrhizobium_arachidis_LMG_26795	0.8835	0.1165
Bradyrhizobium_japonicum_in8p8	Bradyrhizobium_sp_USDA_3384	0.8832	0.1168
Bradyrhizobium_japonicum_in8p8	Bradyrhizobium_japonicum_E109	0.8799	0.1201
Bradyrhizobium_japonicum_in8p8	Bradyrhizobium_japonicum_FN1	0.8805	0.1195
Bradyrhizobium_japonicum_in8p8	Bradyrhizobium_japonicum_USDA_6	0.8805	0.1195
Bradyrhizobium_japonicum_in8p8	Bradyrhizobium_japonicum_CCBAU_25435	0.8796	0.1204
Bradyrhizobium_japonicum_in8p8	Bradyrhizobium_japonicum_SEMIA_5079	0.879	0.121
Bradyrhizobium_japonicum_in8p8	Bradyrhizobium_japonicum_CCBAU_15618	0.8782	0.1218
Bradyrhizobium_japonicum_in8p8	Bradyrhizobium_japonicum_Is-34	0.8804	0.1196
Bradyrhizobium_japonicum_in8p8	Bradyrhizobium_japonicum_USDA_38	0.8788	0.1212
Bradyrhizobium_japonicum_in8p8	Bradyrhizobium_japonicum_USDA_123	0.879	0.121
Bradyrhizobium_japonicum_in8p8	Bradyrhizobium_japonicum_CCBAU_15354	0.8804	0.1196
Bradyrhizobium_japonicum_in8p8	Bradyrhizobium_japonicum_CCBA_15517	0.8791	0.1209
Bradyrhizobium_japonicum_in8p8	Bradyrhizobium_japonicum_CCBAU_83623	0.8797	0.1203
Bradyrhizobium_japonicum_in8p8	Bradyrhizobium_sp_G22	0.8793	0.1207
Bradyrhizobium_japonicum_in8p8	Bradyrhizobium_sp_OK095	0.877	0.123
Bradyrhizobium_japonicum_in8p8	Bradyrhizobium_sp_S23321	0.8774	0.1226
Bradyrhizobium_japonicum_in8p8	Bradyrhizobium_sp_BF49	0.8746	0.1254
Bradyrhizobium_japonicum_in8p8	Bradyrhizobium_sp_WSM471	0.8723	0.1277
Bradyrhizobium_japonicum_in8p8	Bradyrhizobium_sp_WSM1253	0.8754	0.1246
Bradyrhizobium_japonicum_in8p8	Bradyrhizobium_sp_URHA0013	0.877	0.123
Bradyrhizobium_japonicum_in8p8	Bradyrhizobium_sp_WSM1417	0.8739	0.1261
Bradyrhizobium_japonicum_in8p8	Bradyrhizobium_sp_WSM4349	0.8736	0.1264
Bradyrhizobium_japonicum_in8p8	Bradyrhizobium_sp_LTSP849	0.8688	0.1312
Bradyrhizobium_japonicum_in8p8	Bradyrhizobium_sp_LTSP857	0.8698	0.1302
Bradyrhizobium_japonicum_in8p8	Bradyrhizobium_sp_WSM3983	0.8709	0.1291
Bradyrhizobium_japonicum_in8p8	Bradyrhizobium_sp_Gha	0.8662	0.1338
Bradyrhizobium_japonicum_in8p8	Bradyrhizobium_sp_Cp5_3	0.8683	0.1317
Bradyrhizobium_japonicum_in8p8	Bradyrhizobium_neotropicale_BR_10247	0.8679	0.1321
Bradyrhizobium_japonicum_in8p8	Bradyrhizobium_manausense_BR3351	0.8651	0.1349
Bradyrhizobium_japonicum_in8p8	Bradyrhizobium_sp_Ghvi	0.8708	0.1292
Bradyrhizobium_japonicum_in8p8	Bradyrhizobium_sp_BR_10245	0.868	0.132
Bradyrhizobium_japonicum_in8p8	Bradyrhizobium_sp_Ec3_3	0.8526	0.1474
Bradyrhizobium_japonicum_in8p8	Bradyrhizobium_elkanii_587	0.827	0.173
Bradyrhizobium_japonicum_in8p8	Bradyrhizobium_elkanii_CCBAU_05737	0.8287	0.1713
Bradyrhizobium_japonicum_in8p8	Bradyrhizobium_elkanii_USDA_94	0.8282	0.1718
Bradyrhizobium_japonicum_in8p8	Bradyrhizobium_elkanii_BLY6-1	0.8276	0.1724
Bradyrhizobium_japonicum_in8p8	Bradyrhizobium_elkanii_BLY3-8	0.8275	0.1725
Bradyrhizobium_japonicum_in8p8	Bradyrhizobium_elkanii_USDA_76	0.8282	0.1718
Bradyrhizobium_japonicum_in8p8	Bradyrhizobium_elkanii_CCBAU_43297	0.8284	0.1716
Bradyrhizobium_japonicum_in8p8	Bradyrhizobium_elkanii_USDA_3254	0.8276	0.1724
Bradyrhizobium_japonicum_in8p8	Bradyrhizobium_elkanii_USDA_3259	0.8274	0.1726
[truncated: 7,306 more rows]
