# Supplementary material for: Phylogenomic Analyses of Bradyrhizobium Reveal Uneven Distribution of the Lateral and Subpolar Flagellar Systems, Which Extends to Rhizobiales
Source: Microorganisms. 2019 Feb 13;7(2):50. doi: 10.3390/microorganisms7020050 (PMC6406911; doi:10.3390/microorganisms7020050)
Supplement: Supplementary file 1 [file microorganisms-07-00050-s001.zip › Supplementary_Data_S2.xlsx]

## Sheet: Clustering_results
Supplementary Data S2. Clustering of Bradyrhizobium genomes for phylogenomic groups and species identification based on GBDP and ANIb.
		GBDP Phylogroups level clusters		GBDP Species level clusters		ANIb Phylogroups level clusters		ANIb Species level clusters
ID	Strain_name	Reference_partition_ID	OPTSIL_clusters_F0.5_T0.1531	Reference_partition_ID	OPTSIL_clusters_F0.5_T0.0360	ANIb_Reference_PGs_partition_ID	OPTSIL_clusters_ANIb_F0.5_T0.1500	ANIb_Reference_SPs_95%_partition_ID	OPTSIL_clusters_ANIb_F0.5_T0.0500
1	Bradyrhizobium_liaoningense_CCBAU_05525	1	1	1	1	1	1	5	5
2	Bradyrhizobium_liaoningense_CCBAU_83689	1	1	1	1	1	1	5	5
3	Bradyrhizobium_japonicum_USDA_135	1	1	1	1	1	1	5	5
4	Bradyrhizobium_liaoningense_CCNWSX0360	1	1	2	2	1	1	5	5
5	Bradyrhizobium_sp_CCBAU_43298	1	1	3	3	1	1	6	6
6	Bradyrhizobium_sp_CCH5-F6	1	1	4	4	1	1	7	7
7	Bradyrhizobium_japonicum_is5	1	1	5	5	1	1	4	4
8	Bradyrhizobium_japonicum_in8p8	1	1	5	5	1	1	4	4
9	Bradyrhizobium_sp_Leaf396	1	1	5	5	1	1	4	4
10	Bradyrhizobium yuanmingense CGMCC 1.3531	1	1	6	6	1	1	1	1
11	Bradyrhizobium yuanmingense CCBAU 10071	1	1	6	6	1	1	1	1
12	Bradyrhizobium_yuanmingense_CCBAU_25021	1	1	6	6	1	1	1	1
13	Bradyrhizobium_yuanmingense_CCBAU_35157	1	1	6	6	1	1	1	1
14	Bradyrhizobium_yuanmingense_BR3267	1	1	6	6	1	1	1	1
15	Bradyrhizobium_yuanmingense_CCBAU_05623	1	1	6	6	1	1	1	1
16	Bradyrhizobium_sp_DOA9	1	1	7	7	1	1	2	2
17	Bradyrhizobium_sp_WSM1743	1	1	8	8	1	1	3	3
18	Bradyrhizobium_sp_DOA1	1	1	9	9	1	1	8	8
19	Bradyrhizobium_sp_CCGE-LA001	1	1	9	9	1	1	8	8
20	Bradyrhizobium daqingense CGMCC 1.10947	1	1	10	10	1	1	9	9
21	Bradyrhizobium sp. Rc2d	1	1	11	11	1	1	10	10
22	Bradyrhizobium_sp_CCBAU_15615	1	1	12	12	1	1	11	11
23	Bradyrhizobium_japonicum_USDA_4	1	1	12	12	1	1	11	11
24	Bradyrhizobium_sp_CCBAU_15635	1	1	12	12	1	1	11	11
25	Bradyrhizobium_sp_CCBAU_15544	1	1	12	12	1	1	11	11
26	Bradyrhizobium sp. Rc3b	1	1	13	13	1	1	12	12
27	Bradyrhizobium_sp_WSM2793	1	1	13	13	1	1	12	12
28	Bradyrhizobium sp. ERR11	1	1	14	14	1	1	11	11
29	Bradyrhizobium_sp_AT1	1	1	15	15	1	1	14	14
30	Bradyrhizobium_japonicum_22	1	1	16	16	1	1	13	13
31	Bradyrhizobium_japonicum_USDA_124	1	1	17	17	1	1	18	18
32	Bradyrhizobium huanghuaihaiense CGMCC 1.10948	1	1	17	17	1	1	18	18
33	Bradyrhizobium_stylosanthis_BR_446	1	1	18	18	1	1	19	19
34	Bradyrhizobium_sp_USDA_3384	1	1	19	19	1	1	20	20
35	Bradyrhizobium arachidis LMG 26795	1	1	19	19	1	1	20	20
36	Bradyrhizobium_japonicum_FN1	1	1	20	20	1	1	21	21
37	Bradyrhizobium_japonicum_E109	1	1	20	20	1	1	21	21
38	Bradyrhizobium_japonicum_USDA_6	1	1	20	20	1	1	21	21
39	Bradyrhizobium_japonicum_CCBAU_25435	1	1	20	20	1	1	21	21
40	Bradyrhizobium_japonicum_SEMIA_5079	1	1	20	20	1	1	21	21
41	Bradyrhizobium_japonicum_CCBAU_15618	1	1	20	20	1	1	21	21
42	Bradyrhizobium_japonicum_USDA_38	1	1	20	20	1	1	21	21
43	Bradyrhizobium_japonicum_Is-34	1	1	20	20	1	1	21	21
44	Bradyrhizobium_japonicum_CCBAU_83623	1	1	21	21	1	1	21	21
45	Bradyrhizobium_japonicum_CCBAU_15354	1	1	21	21	1	1	21	21
46	Bradyrhizobium_japonicum_CCBA_15517	1	1	21	21	1	1	21	21
47	Bradyrhizobium_japonicum_USDA_123	1	1	21	21	1	1	21	21
48	Bradyrhizobium_sp_G22	1	1	22	22	1	1	21	21
49	Bradyrhizobium_japonicum_Is-1	1	1	23	23	1	1	15	15
50	Bradyrhizobium_japonicum_USDA_122	1	1	23	23	1	1	15	15
51	Bradyrhizobium_diazoefficiens_SEMIA_5080	1	1	23	23	1	1	15	15
52	Bradyrhizobium_sp_CCBAU_41267	1	1	23	23	1	1	15	15
53	Bradyrhizobium_diazoefficiens_USDA_110	1	1	23	23	1	1	15	15
54	Bradyrhizobium_diazoefficiens_NK6	1	1	23	23	1	1	15	15
55	Bradyrhizobium sp. CF659	1	1	24	24	1	1	16	16
56	Bradyrhizobium_sp_WSM2254	1	1	25	25	1	1	16	16
57	Bradyrhizobium_sp_YR681	1	1	26	26	1	1	17	17
58	Bradyrhizobium sp. OK095	1	1	27	27	1	1	22	22
59	Bradyrhizobium_sp_S23321	1	1	28	28	1	1	23	23
60	Bradyrhizobium_sp_WSM471	1	1	29	29	1	1	24	24
61	Bradyrhizobium_sp_BF49	1	1	29	29	1	1	24	24
62	Bradyrhizobium_sp_WSM1253	1	1	30	30	1	1	25	25
63	Bradyrhizobium_sp_WSM1417	1	1	31	31	1	1	26	26
64	Bradyrhizobium_sp_URHA0013	1	1	32	32	1	1	26	26
65	Bradyrhizobium_sp_WSM4349	1	1	33	33	1	1	27	27
66	Bradyrhizobium_sp_LTSP849	1	1	34	34	1	1	28	28
67	Bradyrhizobium_sp_LTSP857	1	1	34	34	1	1	28	28
68	Bradyrhizobium_sp_WSM3983	1	1	35	35	1	1	29	29
69	Bradyrhizobium sp. Gha	1	1	36	36	1	1	30	30
70	Bradyrhizobium sp. Ghvi	1	1	37	37	1	1	33	33
71	Bradyrhizobium_manausense_BR3351	1	1	38	38	1	1	32	32
72	Bradyrhizobium_sp_Cp5_3	1	1	39	39	1	1	31	31
73	Bradyrhizobium_neotropicale_BR_10247	1	1	39	39	1	1	31	31
74	Bradyrhizobium_sp_BR_10245	1	1	40	40	1	1	34	34
75	Bradyrhizobium_sp_Ec3_3	1	1	41	41	1	1	35	35
76	Bradyrhizobium_elkanii_CCBAU_43297	2	2	42	42	2	2	36	36
77	Bradyrhizobium_elkanii_USDA_76	2	2	42	42	2	2	36	36
78	Bradyrhizobium_elkanii_587	2	2	42	42	2	2	36	36
79	Bradyrhizobium_elkanii_BLY6-1	2	2	42	42	2	2	36	36
80	Bradyrhizobium_elkanii_BLY3-8	2	2	42	42	2	2	36	36
81	Bradyrhizobium_elkanii_CCBAU_05737	2	2	43	43	2	2	36	36
82	Bradyrhizobium_elkanii_USDA_94	2	2	43	43	2	2	36	36
83	Bradyrhizobium_elkanii_USDA_3254	2	2	44	44	2	2	37	37
84	Bradyrhizobium_elkanii_USDA_3259	2	2	44	44	2	2	37	37
85	Bradyrhizobium_pachyrhizi_PAC_48	2	2	44	44	2	2	37	37
86	Bradyrhizobium sp. R5	2	2	45	45	2	2	37	37
87	Bradyrhizobium_pachyrhizi_BR3262	2	2	45	45	2	2	37	37
88	Bradyrhizobium erythrophlei MT12	2	2	46	46	2	2	41	41
89	Bradyrhizobium_embrapense_SEMIA_6208	2	2	47	47	2	2	42	42
90	Bradyrhizobium_tropiciagri_SEMIA_6148	2	2	48	48	2	2	40	40
91	Bradyrhizobium_viridifuturi_SEMIA_690	2	2	49	49	2	2	39	39
92	Bradyrhizobium_sp_17-4	2	2	50	50	2	2	38	38
93	Bradyrhizobium_sp_DFCI-1	2	2	50	50	2	2	38	38
94	Bradyrhizobium_sp_th_b2	2	2	51	51	2	2	44	44
95	Bradyrhizobium_elkanii_UASWS1015	2	2	52	52	2	2	43	43
96	Bradyrhizobium_sp_OHSU_III	2	2	52	52	2	2	43	43
97	Bradyrhizobium_sp_LTSP885	2	2	53	53	2	2	45	45
98	Bradyrhizobium_sp_LTSPM299	2	2	54	54	2	2	45	45
99	Bradyrhizobium_sp_BR_10303	2	2	55	55	2	2	46	46
100	Bradyrhizobium_elkanii_WSM2783	3	3	56	56	3	3	48	48
101	Bradyrhizobium_sp_Ai1a-2	3	3	57	57	3	3	47	47
102	Bradyrhizobium_sp_STM_3809	4	4	58	58	4	4	51	51
103	Bradyrhizobium_sp_ORS_278	4	4	59	59	4	4	49	49
104	Bradyrhizobium_sp_ORS_375	4	4	60	60	4	4	50	50
105	Bradyrhizobium_sp_ORS_285	4	4	61	61	4	4	54	54
106	Bradyrhizobium_oligotrophicum_S58	4	4	62	62	4	4	53	53
107	Bradyrhizobium_sp_BTAi1	4	4	63	63	4	4	52	52
108	Bradyrhizobium_sp_STM_3843	5	5	64	64	5	5	55	55
109	Bradyrhizobium_sp_Tv2a-2	6	6	65	65	6	6	56	56
110	Bradyrhizobium_sp_ARR65	7	7	66	66	7	7	57	57
111	Bradyrhizobium_sp_LMTR_3	8	8	67	67	8	8	60	60
112	Bradyrhizobium_retamae_Ro19	8	8	68	68	8	8	59	59
113	Bradyrhizobium_elkanii_WSM1741	8	8	69	69	8	8	58	58
114	Bradyrhizobium_icense_LMTR_13	8	8	70	70	8	8	61	61
115	Bradyrhizobium_valentinum_LmjM6	8	8	71	71	8	8	62	62
116	Bradyrhizobium_valentinum_LmjM3	8	8	71	71	8	8	62	62
117	Bradyrhizobium_paxllaeri_LMTR_21	8	8	72	72	8	8	64	64
118	Bradyrhizobium_jicamae_PAC68	8	8	73	73	8	8	63	63
119	Bradyrhizobium lablabi GAS522	9	9	74	74	9	9	65	65
120	Bradyrhizobium ottawaense GAS524	9	9	74	74	9	9	65	65
121	Bradyrhizobium_sp_URHA0002	9	9	75	75	9	9	66	66
122	Bradyrhizobium erythrophlei GAS138	10	10	76	76	10	10	67	67
123	Bradyrhizobium_sp_URHD0069	10	10	77	77	10	10	68	68
124	Bradyrhizobium erythrophlei GAS242	10	10	78	78	10	10	70	70
125	Bradyrhizobium canariense GAS369	11	11	79	79	11	11	69	69
126	Bradyrhizobium erythrophlei GAS401	12	12	80	80	12	12	71	71
127	Bradyrhizobium_sp_CCH4-A6	13	13	81	81	13	13	72	72
128	Bradyrhizobium_sp_CCH10-C7	13	13	81	81	13	13	72	72

## Sheet: Clusters_tresholds
Supplementary Data S2. Clustering of Bradyrhizobium genomes for phylogenomic groups and species identification based on GBDP and ANIb.
GBDP_Treshold_PGs_Clusters_F0.5				GBDP_Treshold_SPs_Clusters_F0.5				ANIb_Treshold_PGs_Clusters_F0.5				ANIb_Treshold_SPs_Clusters_F0.5
Threshold	No._Clusters	Modif._RI_0	Rand_Ind._0	Threshold	No._Clusters	Modif._RI_0	Rand_Ind._0	Threshold	No._Clusters	Modif._RI_0	Rand_Ind._0	Threshold	No._Clusters	Modif._RI_0	Rand_Ind._0
0.11	38	0.485566	0.250152	0.01	102	0.921587	0.514801	0.11	28	0.587683	0.4268	0.01	103	0.872377	0.339656
0.111	38	0.485566	0.250152	0.011	101	0.925175	0.546137	0.111	27	0.592927	0.428145	0.011	102	0.875768	0.362936
0.112	38	0.485566	0.250152	0.012	100	0.928791	0.576199	0.112	25	0.620966	0.46384	0.012	100	0.883823	0.422016
0.113	35	0.49918	0.268516	0.013	99	0.934254	0.632803	0.113	25	0.620966	0.46384	0.013	98	0.890171	0.463672
0.114	34	0.51013	0.283538	0.014	99	0.934254	0.632803	0.114	25	0.620966	0.46384	0.014	96	0.896291	0.496786
0.115	32	0.526204	0.311549	0.015	96	0.945144	0.717921	0.115	24	0.731596	0.787825	0.015	96	0.896291	0.496786
0.116	31	0.552679	0.364903	0.016	94	0.952029	0.764177	0.116	24	0.731596	0.787825	0.016	95	0.900596	0.528541
0.117	29	0.584755	0.425199	0.017	93	0.955278	0.778876	0.117	23	0.744904	0.791272	0.017	92	0.909558	0.564968
0.118	27	0.615217	0.462586	0.018	92	0.957651	0.786099	0.118	23	0.744904	0.791272	0.018	90	0.914106	0.576724
0.119	26	0.619165	0.463248	0.019	92	0.957651	0.786099	0.119	22	0.773013	0.828283	0.019	88	0.920561	0.605314
0.12	26	0.619165	0.463248	0.02	92	0.957651	0.786099	0.12	22	0.773013	0.828283	0.02	87	0.924338	0.621939
0.121	25	0.729097	0.787261	0.021	89	0.966346	0.820991	0.121	21	0.779256	0.828847	0.021	87	0.924338	0.621939
0.122	24	0.735646	0.788123	0.022	88	0.972261	0.860353	0.122	21	0.779256	0.828847	0.022	87	0.924338	0.621939
0.123	24	0.735646	0.788123	0.023	87	0.974719	0.866665	0.123	21	0.779256	0.828847	0.023	86	0.928574	0.643517
0.124	24	0.735646	0.788123	0.024	87	0.974719	0.866665	0.124	21	0.779256	0.828847	0.024	86	0.928574	0.643517
0.125	23	0.749103	0.79157	0.025	87	0.974719	0.866665	0.125	21	0.779256	0.828847	0.025	85	0.930939	0.64881
0.126	23	0.749103	0.79157	0.026	87	0.974719	0.866665	0.126	20	0.83352	0.903207	0.026	85	0.930939	0.64881
0.127	23	0.749103	0.79157	0.027	85	0.98168	0.897226	0.127	18	0.889634	0.9608	0.027	85	0.930939	0.64881
0.128	22	0.777535	0.828572	0.028	85	0.98168	0.897226	0.128	17	0.906349	0.962923	0.028	83	0.941111	0.714147
0.129	22	0.777535	0.828572	0.029	85	0.98168	0.897226	0.129	17	0.906349	0.962923	0.029	82	0.945859	0.737676
0.13	22	0.777535	0.828572	0.03	84	0.989859	0.964389	0.13	17	0.906349	0.962923	0.03	82	0.945859	0.737676
0.131	22	0.777535	0.828572	0.031	84	0.989859	0.964389	0.131	16	0.948548	0.979569	0.031	81	0.948312	0.742283
0.132	22	0.777535	0.828572	0.032	82	0.994968	0.974813	0.132	16	0.948548	0.979569	0.032	81	0.948312	0.742283
0.133	20	0.847106	0.908657	0.033	81	1	1	0.133	16	0.948548	0.979569	0.033	81	0.948312	0.742283
0.134	18	0.910117	0.966898	0.034	81	1	1	0.134	16	0.948548	0.979569	0.034	81	0.948312	0.742283
0.135	18	0.910117	0.966898	0.035	81	1	1	0.135	16	0.948548	0.979569	0.035	80	0.952772	0.760388
0.136	18	0.910117	0.966898	0.036	81	1	1	0.136	16	0.948548	0.979569	0.036	80	0.952772	0.760388
0.137	18	0.910117	0.966898	0.037	81	1	1	0.137	16	0.948548	0.979569	0.037	80	0.952772	0.760388
0.138	16	0.955367	0.979833	0.038	81	1	1	0.138	16	0.948548	0.979569	0.038	80	0.952772	0.760388
0.139	16	0.955367	0.979833	0.039	81	1	1	0.139	16	0.948548	0.979569	0.039	78	0.961358	0.790889
0.14	16	0.955367	0.979833	0.04	80	0.995319	0.980703	0.14	16	0.948548	0.979569	0.04	77	0.965477	0.803522
0.141	16	0.955367	0.979833	0.041	79	0.987484	0.935494	0.141	16	0.948548	0.979569	0.041	77	0.965477	0.803522
0.142	16	0.955367	0.979833	0.042	79	0.987484	0.935494	0.142	16	0.948548	0.979569	0.042	76	0.981673	0.950513
0.143	16	0.955367	0.979833	0.043	79	0.987484	0.935494	0.143	16	0.948548	0.979569	0.043	75	0.984316	0.953743
0.144	16	0.955367	0.979833	0.044	78	0.971278	0.78908	0.144	15	0.975215	0.998957	0.044	75	0.984316	0.953743
0.145	16	0.955367	0.979833	0.045	78	0.971278	0.78908	0.145	15	0.975215	0.998957	0.045	73	0.983255	0.951092
0.146	16	0.955367	0.979833	0.046	78	0.971278	0.78908	0.146	15	0.975215	0.998957	0.046	73	0.983255	0.951092
0.147	16	0.955367	0.979833	0.047	78	0.971278	0.78908	0.147	15	0.975215	0.998957	0.047	73	0.983255	0.951092
0.148	16	0.955367	0.979833	0.048	75	0.959795	0.76499	0.148	15	0.975215	0.998957	0.048	72	0.991339	0.982181
0.149	16	0.955367	0.979833	0.049	74	0.957201	0.762078	0.149	15	0.975215	0.998957	0.049	72	0.991339	0.982181
0.15	16	0.955367	0.979833	0.05	74	0.957201	0.762078	0.15	13	0.992531	0.999739	0.05	72	0.991339	0.982181
0.151	15	0.962285	0.980096	0.051	74	0.957201	0.762078	0.151	12	0.957805	0.993493	0.051	72	0.991339	0.982181
0.152	14	0.989741	0.999479	0.052	74	0.957201	0.762078	0.152	12	0.957805	0.993493	0.052	70	0.98797	0.965727
0.153	13	1	1	0.053	74	0.957201	0.762078	0.153	12	0.957805	0.993493	0.053	67	0.959918	0.852854
0.154	13	1	1	0.054	72	0.94942	0.747836	0.154	12	0.957805	0.993493	0.054	67	0.959918	0.852854
0.155	13	1	1	0.055	72	0.94942	0.747836	0.155	12	0.957805	0.993493	0.055	67	0.959918	0.852854
0.156	13	1	1	0.056	69	0.927026	0.652233	0.156	12	0.957805	0.993493	0.056	66	0.95615	0.848516
0.157	13	1	1	0.057	67	0.915673	0.629396	0.157	12	0.957805	0.993493	0.057	65	0.953415	0.846363
0.158	13	1	1	0.058	67	0.915673	0.629396	0.158	12	0.957805	0.993493	0.058	64	0.949648	0.842087
0.159	12	0.965013	0.993753	0.059	67	0.915673	0.629396	0.159	12	0.957805	0.993493	0.059	63	0.940773	0.817271
0.16	12	0.965013	0.993753	0.06	66	0.906729	0.606174	0.16	12	0.957805	0.993493	0.06	63	0.940773	0.817271
0.161	12	0.965013	0.993753	0.061	65	0.904135	0.604313	0.161	12	0.957805	0.993493	0.061	62	0.937005	0.813269
0.162	12	0.965013	0.993753	0.062	65	0.904135	0.604313	0.162	12	0.957805	0.993493	0.062	62	0.937005	0.813269
0.163	12	0.965013	0.993753	0.063	65	0.904135	0.604313	0.163	12	0.957805	0.993493	0.063	62	0.937005	0.813269
0.164	12	0.965013	0.993753	0.064	65	0.904135	0.604313	0.164	12	0.957805	0.993493	0.064	62	0.937005	0.813269
0.165	12	0.965013	0.993753	0.065	64	0.895718	0.582805	0.165	12	0.957805	0.993493	0.065	61	0.93427	0.811282
0.166	12	0.965013	0.993753	0.066	63	0.892146	0.579362	0.166	11	0.919818	0.981054	0.066	61	0.93427	0.811282
0.167	12	0.965013	0.993753	0.067	63	0.892146	0.579362	0.167	11	0.919818	0.981054	0.067	60	0.928606	0.799551
0.168	12	0.965013	0.993753	0.068	63	0.892146	0.579362	0.168	11	0.919818	0.981054	0.068	60	0.928606	0.799551
0.169	11	0.926739	0.981315	0.069	63	0.892146	0.579362	0.169	9	0.892232	0.97873	0.069	60	0.928606	0.799551
0.17	10	0.91453	0.98054	0.07	63	0.892146	0.579362	0.17	9	0.892232	0.97873	0.07	60	0.928606	0.799551
0.171	10	0.91453	0.98054	0.071	63	0.892146	0.579362	0.171	9	0.892232	0.97873	0.071	60	0.928606	0.799551
0.172	10	0.91453	0.98054	0.072	63	0.892146	0.579362	0.172	8	0.884764	0.978472	0.072	60	0.928606	0.799551
0.173	10	0.91453	0.98054	0.073	63	0.892146	0.579362	0.173	8	0.884764	0.978472	0.073	60	0.928606	0.799551
0.174	10	0.91453	0.98054	0.074	61	0.886958	0.575958	0.174	7	0.763453	0.905945	0.074	59	0.925871	0.797627
0.175	9	0.907005	0.980282	0.075	60	0.881587	0.565972	0.175	7	0.763453	0.905945	0.075	59	0.925871	0.797627
0.176	9	0.907005	0.980282	0.076	60	0.881587	0.565972	0.176	7	0.763453	0.905945	0.076	59	0.925871	0.797627
0.177	7	0.769198	0.906204	0.077	59	0.8764	0.559497	0.177	7	0.763453	0.905945	0.077	59	0.925871	0.797627
0.178	7	0.769198	0.906204	0.078	59	0.8764	0.559497	0.178	6	0.380629	0.313658	0.078	58	0.920935	0.790019
0.179	7	0.769198	0.906204	0.079	59	0.8764	0.559497	0.179	6	0.380629	0.313658	0.079	58	0.920935	0.790019
0.18	7	0.769198	0.906204	0.08	59	0.8764	0.559497	0.18	6	0.380629	0.313658	0.08	58	0.920935	0.790019
0.181	7	0.769198	0.906204	0.081	58	0.873806	0.5579	0.181	6	0.380629	0.313658	0.081	58	0.920935	0.790019
0.182	7	0.769198	0.906204	0.082	58	0.873806	0.5579	0.182	6	0.380629	0.313658	0.082	58	0.920935	0.790019
0.183	6	0.383493	0.313796	0.083	57	0.869125	0.551599	0.183	6	0.380629	0.313658	0.083	57	0.916497	0.784402
0.184	6	0.383493	0.313796	0.084	57	0.869125	0.551599	0.184	6	0.380629	0.313658	0.084	56	0.91273	0.780699
0.185	6	0.383493	0.313796	0.085	57	0.869125	0.551599	0.185	6	0.380629	0.313658	0.085	55	0.908962	0.777029
0.186	6	0.383493	0.313796	0.086	57	0.869125	0.551599	0.186	6	0.380629	0.313658	0.086	54	0.905195	0.773391
0.187	6	0.383493	0.313796	0.087	57	0.869125	0.551599	0.187	5	0.237197	0.175929	0.087	54	0.905195	0.773391
0.188	5	0.369912	0.313065	0.088	56	0.866531	0.550045	0.188	5	0.237197	0.175929	0.088	53	0.89699	0.757414
0.189	5	0.369912	0.313065	0.089	55	0.862323	0.545433	0.189	4	0.223717	0.175254	0.089	52	0.891656	0.748804
0.19	4	0.225401	0.175338	0.09	55	0.862323	0.545433	0.19	3	0.168825	0.135559	0.09	52	0.891656	0.748804
				0.091	54	0.857265	0.537907
				0.092	54	0.857265	0.537907
				0.093	53	0.853693	0.534952
				0.094	51	0.837185	0.501766
				0.095	51	0.837185	0.501766
				0.096	51	0.837185	0.501766
				0.097	50	0.831814	0.494074
				0.098	50	0.831814	0.494074
				0.099	49	0.810378	0.416656
				0.1	49	0.810378	0.416656
